# Supplementary material for: MBNL Depletion Induces Muscle Stem Cell Activation and Myofibre Fusion while Impairing Myonuclear Maturation in Myotonic Dystrophy Type 1
Source: Research Square preprint supplement (doi:10.21203/rs.3.rs-7311936/v1), 2025-08-13
Supplement: Supplementary file 1 [file 45ccea8600da246f29322244.xlsx]

## Sheet: Tabelle1
Supplementary Table T3. Guide RNA sequences for DMPK.
	position (GRCh 38)	strand	sequence
DMPK-Forward	chr19: 45,769,150	+	CGGGACAACGCAGAAGGTAA
DMPK-Reverse	chr19: 45,770,803	-	CAGCCAATGACGAGTTCGGA
