# Supplementary material for: MBNL Depletion Induces Muscle Stem Cell Activation and Myofibre Fusion while Impairing Myonuclear Maturation in Myotonic Dystrophy Type 1
Source: Research Square preprint supplement (doi:10.21203/rs.3.rs-7311936/v1), 2025-08-13
Supplement: Supplementary file 1 [file 1315fbd8d2c43134085a216e.pdf]

A

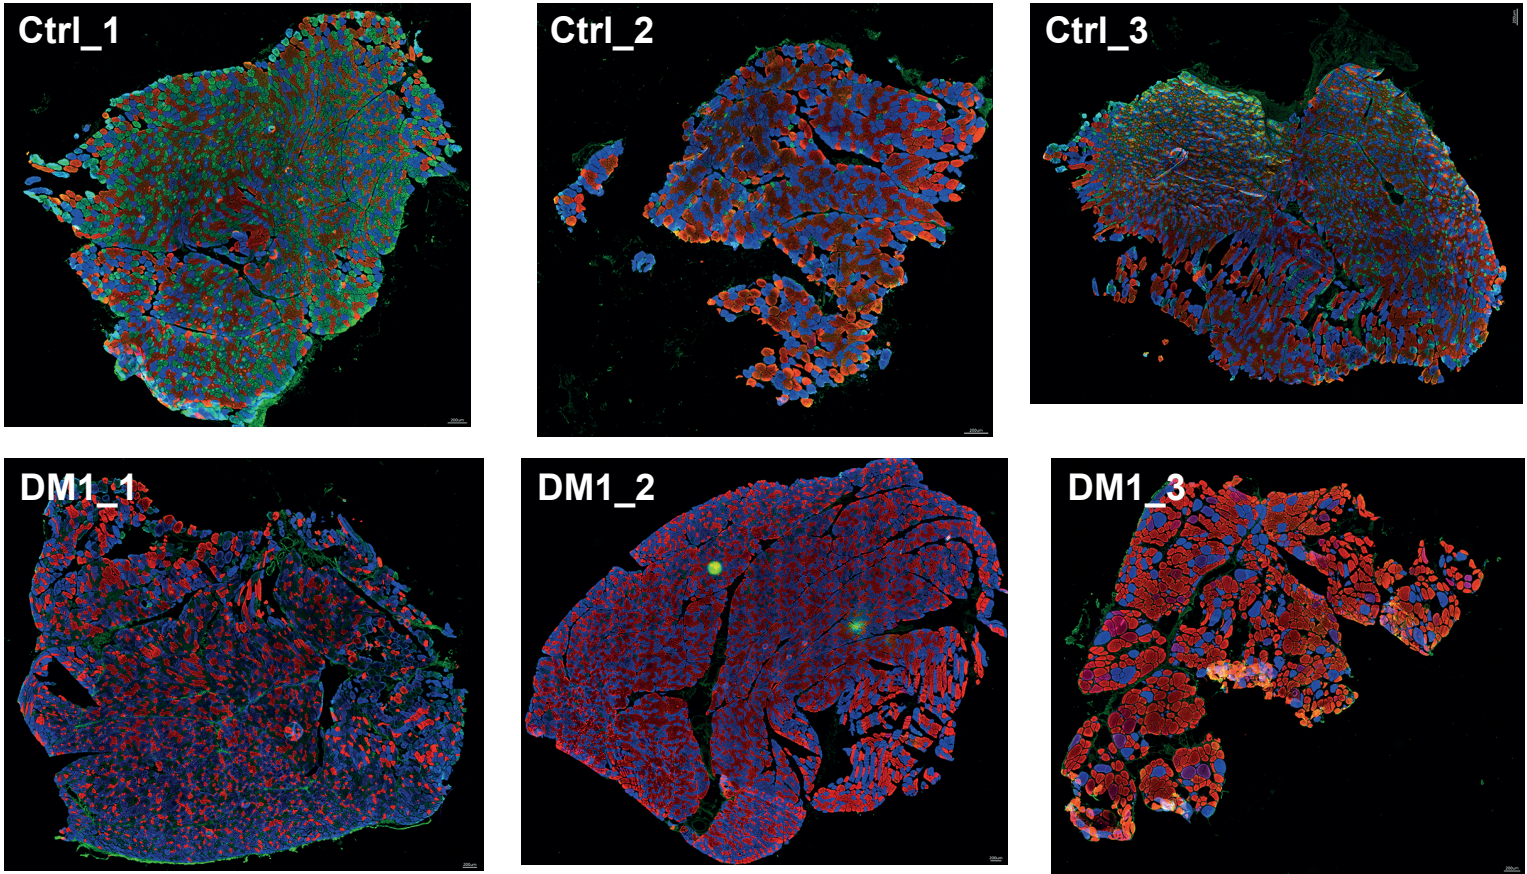

B

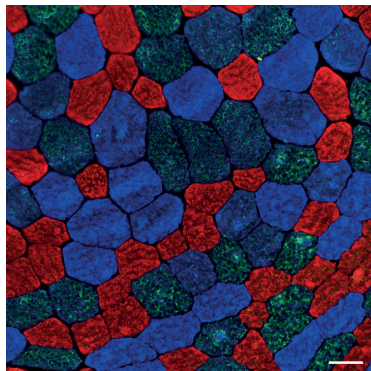

C

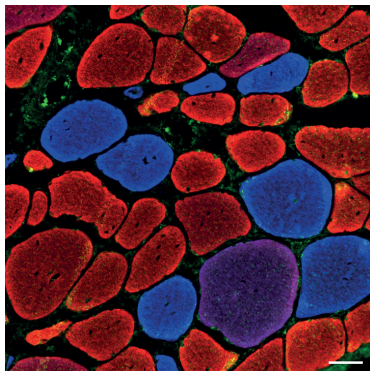

D

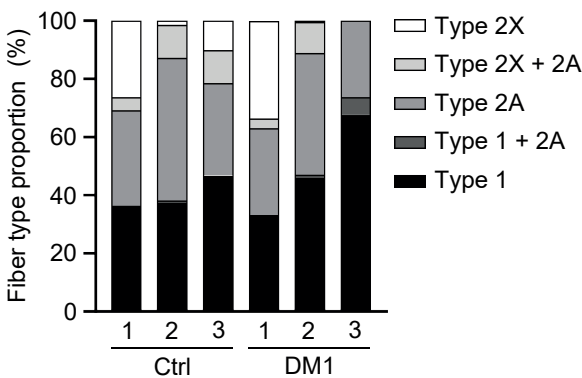

**Fiber type distribution in Control and DM1 patient muscle specimens. (A)** Representative immunofluorescence images of control and DM1 patient muscles sections stained for myosin heavy chain (MyHC) Type I (red), Type IIA (blue), and Type IIX (green). Scale bar: 200  $\mu$ m. **(B)** Higher magnification image of control (Ctrl\_1) muscle section. Scale bar: 50  $\mu$ m. **(C)** Higher magnification of DM1 (DM1\_3) muscle section. Scale bar: 50  $\mu$ m. **(D)** Quantification of fiber type proportion of control and DM1 patient muscle biopsies.
