# Supplementary material for: MBNL Depletion Induces Muscle Stem Cell Activation and Myofibre Fusion while Impairing Myonuclear Maturation in Myotonic Dystrophy Type 1
Source: Research Square preprint supplement (doi:10.21203/rs.3.rs-7311936/v1), 2025-08-13
Supplement: Supplementary file 2 [file 64d4af8227d77bdfccda3f5c.xlsx]

## Sheet: Sheet1
Supplementary Table T2. 933 genes significantly differentially expressed in Cluster X compared to other myonuclear clusters
genes	proto-DM1 (100 - 75%)	classic DM1 (75 - 25%)	severe DM1 (25 - 0%)	Cluster X vs myonuclei
SH2D1B	1.39165e-06	-0.0443729	-3.03708	-4.56684
MYH1	6.61174e-06	0.265836	-1.34701	-4.25106
FAM166B	-9.35817e-06	-0.48087	-2.14602	-3.68113
PPP1R27	-2.53293e-06	-0.823385	-2.00272	-3.65694
PLIN5	0.000221304	-0.353769	-1.60635	-3.44987
RELT	1.19419e-06	-0.302818	-1.28206	-3.76964
ODF3L2	4.84355e-07	-0.138547	-1.66225	-3.92766
CCR3	-1.1108e-05	-0.760968	-1.01052	-3.33446
KCNT1	-2.55352e-06	-0.593723	-1.3132	-3.28075
TBC1D1	-0.000405099	-0.546699	-1.14734	-2.84252
CCDC69	3.29336e-06	-0.685365	-1.13434	-2.82091
RILP	-1.21933e-05	-0.666074	-1.14423	-2.90756
SLC35E4	3.15947e-06	-0.345813	-1.11429	-2.73844
PYGM	-1.08221e-05	-0.54441	-1.15475	-2.74836
UCP3	-1.94985e-05	-0.522406	-1.11825	-2.67012
ASB2	-1.7313e-05	-0.583059	-1.54964	-2.70392
VEGFA	5.07484e-05	-0.69512	-1.36878	-2.96754
SMCO1	-2.10282e-05	-0.641353	-1.49854	-2.91296
MYLK2	-1.06689e-05	-0.553685	-1.42887	-2.85564
LPL	-1.05033e-05	-0.856629	-1.5104	-2.96571
FBP2	-6.41981e-06	-0.640404	-1.58284	-3.12147
MYH7	4.0045e-07	-0.125235	-0.65225	-3.50348
PDE4A	-7.74649e-06	-0.319174	-0.652939	-3.85635
G0S2	0.661125	0.00348895	-1.12329	-3.45904
ROS1	-4.57285e-07	0.244744	-0.835926	-3.27685
LRRC23	-2.02904e-06	-0.303256	-0.688114	-3.1295
MYL2	-7.9096e-06	-0.432308	-0.715589	-3.23848
SMTNL2	5.09693e-06	-0.425585	-0.799305	-3.32639
RASA4B	4.01652e-06	-0.227446	-0.951456	-2.9327
PAIP2B	-6.8304e-06	-0.0464054	-0.981577	-2.99915
GDNF	-1.73664e-07	-0.1098	-0.991282	-2.88736
LMO1	-2.14799e-06	-0.243841	-1.10205	-3.26781
PLIN4	2.80187e-05	-0.424121	-1.04551	-3.13345
SLC16A3	-4.79138e-06	-1.68682	-2.70853	-0.624988
BNC2	8.61826e-08	-1.04792	-1.78211	0.608387
MT1X	-9.18507e-06	-1.09553	-2.04386	0.671753
ATP1B1	-0.000118317	-0.425028	-0.720184	-2.65233
COX14	-1.76336e-05	-0.447239	-0.704598	-2.64743
EEPD1	-3.60138e-06	-0.292756	-0.571278	-2.48256
MYADML2	-2.18614e-05	-0.441813	-0.586976	-2.474
RNF128	-1.71834e-05	-0.336133	-0.861091	-2.75044
MAOA	-2.69861e-06	-0.322069	-0.882823	-2.78549
XIRP1	-4.61652e-07	-0.216271	-0.890261	-2.62675
MAP2K6	-6.77225e-05	-0.217901	-1.03122	-2.66051
HK1	-1.51773e-06	-0.1461	-0.765771	-2.6627
UGT3A1	-1.46524e-06	-0.205824	-0.545363	-2.76498
RASA4	9.74879e-06	-0.123039	-0.685201	-2.85885
FABP3	-8.76635e-05	-0.458659	-0.863033	-2.48044
ACACB	1.73599e-05	-0.478445	-1.02568	-2.44679
ALDH1L1	-1.01567e-05	-0.428581	-0.99557	-2.16379
SLC29A1	-1.41636e-05	-0.49565	-0.847913	-2.23963
MAOB	-4.23091e-06	-0.263123	-0.892508	-2.25744
MYLK4	-0.000131781	-0.101097	-0.990274	-2.21289
AQP4	-3.2723e-06	-0.147766	-1.02774	-2.27348
FBXO32	3.43242e-05	-0.368417	-1.17696	-2.44973
MN1	-3.60565e-06	-0.350735	-1.2146	-2.1852
SELENBP1	-0.50353	-0.424074	-0.851993	-2.43303
TP53INP2	-0.463044	-0.29631	-0.677421	-2.25711
SEMA4B	-2.52386e-06	-0.549302	-0.555731	-2.33079
E2F3	-5.0956e-06	-0.195898	-0.562596	-2.27135
STK33	5.54567e-06	-0.286895	-0.578173	-2.33232
CNKSR1	-1.01264e-06	-0.334217	-0.521747	-2.10818
GPI	-4.28195e-07	-0.400361	-0.563509	-2.2462
SLC16A1	-2.22457e-05	-0.787967	-1.2952	-2.06503
PARP15	-5.97898e-06	-0.629594	-1.3114	-2.14582
RGS3	-7.8543e-06	-0.707828	-1.26855	-2.28601
HSPB7	-4.34628e-06	-0.812079	-0.961459	-2.19544
ANKRD9	-1.93651e-05	-0.715505	-1.10773	-2.36833
NKAIN1	1.12959e-05	0.095274	-0.575161	-2.05573
HYAL4	-1.9688e-06	-0.111329	-0.63072	-2.36401
CHAF1B	2.07953e-06	-0.0444635	-0.797592	-2.37496
TPI1	0.000152164	-0.42224	-0.56942	-1.65903
PGPEP1L	-3.96904e-06	-0.36207	-0.525435	-1.73403
SLC2A4	-9.97006e-06	-0.42817	-0.554434	-1.73265
HSPA1A	6.64102e-05	-0.202054	-0.827599	-1.76025
SLC7A2	-3.9205e-06	-0.221584	-0.782811	-1.70021
KCND3	-7.98878e-06	-0.348657	-0.793024	-1.76091
ST3GAL1	-6.44167e-06	-0.283024	-0.831766	-1.68983
LDHA	5.39202e-06	-0.0243889	-0.548893	-1.88224
HSF4	-6.03978e-06	-0.145805	-0.562418	-1.79011
SLC36A2	-1.0864e-05	-0.205448	-0.591537	-1.84976
RAB11FIP1	-6.80946e-06	-0.140981	-0.634167	-1.87994
THSD4	-2.38094e-06	-0.184216	-0.656333	-2.09578
PPP1R1A	1.85589e-06	-0.250609	-0.629949	-2.04325
ZNF423	6.51872e-06	-0.258977	-0.609403	-2.03774
ALDH1L1-AS2	-3.88729e-06	-0.249741	-0.766497	-1.86595
ASB18	-4.35805e-06	-0.284291	-0.731185	-2.04609
ARRDC2	1.93326e-05	-0.30821	-0.756029	-1.96084
IDI2	-0.970589	-0.640045	-2.2706	-2.59367
IGFN1	1.90478e-06	-0.0445833	-1.97913	-2.6694
PPP1R3C	-8.15867e-06	-0.413584	-1.6888	-2.28629
PCAT7	-8.99329e-06	-0.356723	-1.45559	-2.11497
ATP2A1	-5.08784e-07	-0.398641	-1.33612	-2.28789
OPTN	-1.26716e-05	-0.440684	-1.46821	-2.34803
NOS1	1.04635e-05	-0.383742	-1.4641	-2.31223
PSTPIP2	-6.24882e-06	-0.890367	-2.25149	-2.25149
CKM	-1.26073e-05	-1.10751	-1.88487	-2.00793
ATP2B2	-6.12054e-06	-0.962175	-1.94667	-2.98765
RNF157	-5.64625e-06	-0.588595	-2.26878	-2.76673
ARNTL	-0.6878	-0.194669	-0.518808	-1.54154
EPB41	-0.33156	-0.237416	-0.596739	-1.39546
FBXO40	-0.291365	-0.360217	-0.618581	-1.48891
NIN	0.33073	0.00106864	-0.571169	-1.2147
GREM2	4.43362e-06	0.132204	-0.574223	-1.18454
MPP7	5.78393e-05	-0.085436	-0.596813	-1.09711
VSIG10	-5.87205e-06	-0.124404	-0.565524	-1.15989
ABRA	1.16389e-06	-0.12534	-0.661299	-1.69085
GDNF-AS1	4.74488e-05	-0.0785801	-0.612934	-1.58209
GPT2	-7.07547e-06	-0.0446157	-0.589542	-1.53133
TPM2	-5.51048e-05	-0.18996	-0.61652	-1.34998
TFRC	-1.26532e-06	-0.119291	-0.555345	-1.38152
SYNM	-4.73134e-06	-0.141732	-0.523112	-1.35976
SLC25A25	1.13126e-06	-0.0103687	-0.538146	-1.40526
ABCC4	-9.75105e-06	-0.0222814	-0.595174	-1.31182
NMNAT1	-5.3935e-06	-0.319814	-0.685478	-1.40009
LMOD2	3.18821e-05	-0.276499	-0.643022	-1.30386
DNAJB1	-1.85839e-06	-0.294039	-0.599541	-1.36603
RPL3L	4.47592e-06	-0.178694	-0.638686	-1.49191
MLXIP	-2.85836e-05	-0.261292	-0.625517	-1.58349
ST8SIA5	3.89159e-06	-0.282732	-0.613106	-1.49221
SREBF1	-3.38485e-06	-0.345067	-0.501171	-1.44712
LDB3	-2.11847e-05	-0.254404	-0.509993	-1.49667
C1orf21	-1.29784e-05	-0.273111	-0.558515	-1.43476
SPTBN4	-1.05482e-05	-0.226637	-0.538188	-1.4085
SAR1B	-0.347541	-0.406337	-0.738925	-1.02391
ASAP3	-0.438446	-0.268081	-0.793372	-1.159
ME1	-0.477145	-0.427578	-0.762883	-1.21649
NEAT1	0.000256246	-0.529438	-0.67337	-0.947039
SIVA1	1.08973e-06	-0.428891	-0.801331	-1.00839
BZW2	-1.02659e-05	-0.415822	-0.687336	-0.956816
DCXR	-1.15787e-05	-0.399296	-0.698365	-0.936772
FNDC5	4.20674e-05	-0.393895	-0.752329	-0.915255
EEF2K	-8.92077e-06	-0.424895	-0.730926	-0.908669
OBSCN	6.96406e-07	-0.324412	-0.723828	-1.14453
ASB15	-1.44299e-05	-0.292892	-0.673423	-1.20364
BOLA3	-1.01574e-05	-0.423331	-0.733458	-1.24163
FHIT	-1.60567e-05	-0.421809	-0.734229	-1.22204
NRP1	6.38273e-06	-0.375186	-0.698244	-1.25993
ACADVL	-1.73984e-05	-0.352044	-0.671197	-1.21635
BCL6	-1.04731e-05	-0.372859	-0.577893	-1.10152
ST6GAL1	-9.26895e-06	-0.402248	-0.606836	-1.19269
MYOT	-7.23659e-06	-0.468088	-0.607461	-1.15231
TRIM63	0.000239124	-0.331303	-0.710775	-1.03837
CES3	-6.80962e-06	-0.446606	-0.708749	-1.07791
CLUH	5.86797e-06	-0.426858	-0.648704	-1.08195
MAPK12	-5.47982e-06	-0.544488	-1.19438	-1.26901
SLC1A4	7.74526e-06	-0.460988	-1.17139	-1.42658
SLC25A4	-1.1119e-05	-0.589125	-1.1449	-1.42837
GOT1	-4.11709e-06	-0.29971	-0.917776	-1.2917
CAMK2G	-1.43784e-05	-0.432739	-0.827418	-1.16379
KEAP1	-2.02577e-05	-0.467933	-0.894104	-1.17275
ASB10	-1.07981e-05	-0.592746	-1.00854	-1.31734
DUSP13	-1.29892e-05	-0.665806	-1.06115	-1.24663
GOT2	0.000145593	-0.565036	-1.18123	-1.14549
OPLAH	-7.45137e-06	-0.521008	-1.09246	-1.13785
TPST2	-2.90029e-05	-0.582534	-1.07149	-1.12484
PTPN3	-1.18639e-05	-0.574848	-1.03998	-1.05322
JUP	-7.84456e-07	-0.497065	-1.00839	-1.19324
DHRSX	-8.98017e-06	-0.546962	-0.583928	-1.49086
EGLN1	-1.7068e-05	-0.438112	-0.740097	-1.3406
CLIC5	-4.81872e-06	-0.476877	-0.833217	-1.37204
CUEDC1	3.13706e-06	-0.497552	-0.700396	-1.44629
GABARAPL1	-3.42095e-05	-0.512032	-0.664743	-1.36877
DUSP26	-3.1942e-05	-0.444339	-0.667588	-1.34307
SNTA1	-3.1179e-06	-0.445073	-0.684468	-1.39047
SLC22A23	-8.3443e-06	-0.559584	-0.751319	-1.591
ABCC1	-3.20887e-05	-0.600014	-0.834044	-1.50731
CHSY3	-1.00324e-05	-0.581083	-0.957065	-1.48116
LAPTM4B	-1.35099e-05	-0.608716	-0.997764	-1.60296
PLIN2	0.000173477	-0.326554	-1.01198	-1.58097
TRIP10	-1.46703e-07	-0.367251	-1.07661	-1.53022
NUDT19	-1.776e-05	-0.382226	-0.901951	-1.57484
CTSC	-1.61186e-05	-0.452358	-0.844768	-1.54592
ZCCHC2	-1.08053e-05	-0.423637	-0.852845	-1.51852
NRG4	-1.22596e-05	-0.278033	-0.81645	-1.45518
HSPA1B	1.28882e-06	-0.288676	-0.907591	-1.49672
MID1IP1	2.0939e-05	-0.305593	-0.893095	-1.45297
SH3BGR	-1.35794e-05	-0.30903	-0.880307	-1.46933
ATRNL1	5.55908e-07	-0.0937675	-1.54418	-0.911607
LGR5	-1.71654e-06	-0.118902	-1.2674	-1.2469
MYBPC2	-1.55956e-06	-0.173757	-1.21975	-0.931791
SCP2	-2.69626e-05	-0.500565	-0.944562	-1.03432
SH2B2	2.48354e-07	-0.520775	-0.848642	-1.0353
GLUL	-1.05866e-05	-0.430825	-0.977263	-0.972841
PDE4D	-9.22223e-05	-0.456612	-0.902496	-0.898552
SYNGR1	-1.13102e-05	-0.625128	-0.867447	-1.06053
TANGO2	-1.45528e-05	-0.671934	-0.853938	-1.11041
SQSTM1	1.19134e-05	-0.564074	-0.942583	-0.930339
MDH2	3.40973e-06	-0.649938	-1.02332	-0.968278
IPO13	-1.37113e-05	-0.633966	-0.925395	-0.988896
CHCHD10	-5.63523e-06	-0.695057	-0.953578	-0.966884
PTP4A3	8.74044e-06	-0.698034	-1.07382	-0.781892
RNF34	-1.32294e-05	-0.564589	-1.08173	-0.739386
EPS15L1	-7.32796e-06	-0.600348	-1.04076	-0.690654
MIB2	-1.99089e-06	-0.531387	-1.1892	-0.92556
KCNJ12	-9.07304e-06	-0.589298	-1.18475	-0.985308
KLHL30	1.33982e-06	-0.493881	-1.08995	-0.875822
PRKCA	2.60501e-06	-0.468037	-1.08928	-0.96617
MBP	-2.99702e-05	-0.57557	-1.05099	-0.601315
PEBP4	5.41238e-06	-0.393251	-1.14835	-0.52903
IDH2	-7.81596e-06	-0.503759	-1.12588	-0.613509
MYOM1	7.54171e-05	-0.506957	-1.14791	-0.516917
FLII	-1.17665e-06	-0.818548	-1.36818	-0.687632
PKM	-7.6926e-05	-0.60458	-1.29066	-0.781683
RBM20	-2.20941e-05	-0.698012	-1.39385	-0.920629
BLVRB	-1.41264e-05	-0.728366	-1.23341	-0.981692
ITSN1	-9.92051e-05	-0.196475	-0.521739	-0.516319
SLC25A27	-8.28914e-06	-0.244294	-0.535678	-0.515141
FBXL20	-2.50389e-05	-0.261657	-0.519536	-0.535367
SMAP1	-1.26307e-05	-0.299107	-0.501841	-0.561659
MYOZ1	-0.000363643	-0.328853	-0.503262	-0.595041
TTN	8.76561e-07	-0.239908	-0.578813	-0.672262
UBE2B	1.70681e-05	-0.280266	-0.573635	-0.675925
PFKFB1	9.00092e-06	-0.223543	-0.565967	-0.621767
DIAPH2-AS1	-2.32824e-05	-0.231274	-0.556264	-0.627333
NOL3	-2.83357e-06	-0.270177	-0.591329	-0.61787
MAP4	-9.02228e-06	-0.260085	-0.59481	-0.646218
NUDT4	9.23678e-05	-0.256329	-0.585723	-0.642766
SIMC1	-6.39361e-07	-0.163076	-0.637607	-0.594167
WBP1L	2.28851e-06	-0.237317	-0.63296	-0.582927
KIF1C	-1.91943e-05	-0.249456	-0.688943	-0.608797
BCKDHB	-7.03422e-06	-0.303655	-0.729518	-0.512373
OGDH	-8.67761e-06	-0.346473	-0.616359	-0.508064
RYR1	0.000777502	-0.331731	-0.65924	-0.5022
RCSD1	-6.89537e-06	-0.302795	-0.63781	-0.589416
EPM2A	-1.24131e-05	-0.319322	-0.588966	-0.553481
DOCK4	1.26368e-06	-0.284846	-0.734608	-0.879647
CYTH1	-1.15238e-05	-0.334387	-0.687542	-0.896792
STK25	-2.42424e-06	-0.302862	-0.581589	-0.844913
NUCB1	0.000162438	-0.360553	-0.566291	-0.869575
SYPL2	-1.14584e-05	-0.368588	-0.593256	-0.826764
VWA8	-1.42785e-05	-0.334633	-0.591057	-0.828719
UBC	-3.42407e-06	-0.306551	-0.605348	-0.917558
PIR	-0.000158207	-0.316201	-0.549006	-0.941804
GPR135	-5.88579e-07	-0.314798	-0.514144	-0.894171
ANKRD52	8.88467e-07	-0.29252	-0.535306	-1.00863
DIAPH2	-2.28057e-05	-0.287011	-0.615869	-1.02186
AR	-2.82352e-06	-0.314268	-0.579428	-1.06849
MDH1	0.000414224	-0.238095	-0.530275	-0.930271
CS	0.000578969	-0.240969	-0.523775	-0.909625
HSPA8	-2.57797e-06	-0.196947	-0.574431	-0.893152
TACC2	0.00026444	-0.203648	-0.598063	-0.92294
CMYA5	3.4322e-06	-0.173194	-0.592874	-1.02406
SLC9A2	7.53378e-06	-0.117272	-0.534701	-0.961737
TECRL	-3.99821e-06	-0.10548	-0.591444	-0.969924
LGR4	-3.91303e-06	-0.0545614	-0.517107	-0.877567
FAM151A	-2.87589e-06	-0.120822	-0.589994	-0.785798
IL18	-1.84596e-06	-0.0398374	-0.618029	-0.827964
RNF150	3.48173e-06	-0.138077	-0.56504	-0.681457
GHR	-1.58439e-06	-0.133439	-0.603732	-0.68354
PCGF5	-2.65729e-07	-0.204662	-0.504345	-0.709375
ACO2	-1.37142e-05	-0.189962	-0.530535	-0.749896
BTG2	-1.59597e-06	-0.188976	-0.535258	-0.828738
RNF114	-1.89602e-05	-0.243083	-0.548276	-0.805574
AIMP2	2.67582e-06	-0.271772	-0.592835	-0.715711
TRAPPC9	-1.10267e-05	-0.314242	-0.586502	-0.714938
CD38	6.06055e-06	-0.329055	-0.533113	-0.768768
UBE2O	-3.19828e-06	-0.307445	-0.523504	-0.715839
FXN	-2.17297e-06	-0.279616	-0.62557	-0.805212
SAMD4A	-1.70757e-05	-0.293222	-0.660542	-0.775157
RBM38	-3.36586e-05	-0.229471	-0.60834	-0.730842
PGK1	-1.81489e-06	-0.237475	-0.69208	-0.710976
PGP	1.46501e-06	-0.294414	-0.656652	-0.70465
NNT	-9.24397e-06	-0.282467	-0.868814	-0.842649
ZYG11B	1.62887e-05	-0.238437	-0.789653	-0.843572
IRS2	-9.77576e-06	-0.241171	-0.824338	-0.92072
CYP27A1	5.99909e-06	-0.170921	-0.848604	-0.84136
NEDD1	-6.35692e-06	-0.143544	-0.783413	-0.773495
SAMM50	-1.65283e-05	-0.254264	-0.800806	-0.740959
STXBP5	-7.9325e-05	-0.255736	-0.710825	-0.805568
AAMDC	-7.99096e-06	-0.189567	-0.714179	-0.819006
HDAC4	-2.35887e-08	-0.291776	-1.03515	-0.853065
MSRB3	-7.34685e-06	-0.272671	-1.0287	-0.882405
PGM1	-4.22983e-06	-0.366385	-1.03526	-0.686649
VDAC1	-3.74278e-05	-0.393599	-0.978452	-0.812747
HHATL	-7.0776e-06	-0.541081	-0.559296	-0.662588
PDLIM7	1.0049e-06	-0.567379	-0.625837	-0.748613
ARHGEF10L	8.21734e-06	-0.443146	-0.538774	-0.723573
COX7B	-1.99772e-05	-0.423866	-0.549857	-0.667588
EMC3	-3.88921e-05	-0.376707	-0.576422	-0.601183
FAM210A	-1.33491e-05	-0.438183	-0.565837	-0.610275
ALPK3	-1.62749e-05	-0.483712	-0.636062	-0.677492
C19orf12	-9.26476e-06	-0.484762	-0.711982	-0.671281
CALCOCO2	1.96684e-05	-0.363749	-0.70145	-0.666891
ISCA1	-1.53883e-05	-0.344183	-0.640849	-0.670535
NDUFS7	-2.92335e-06	-0.377335	-0.654355	-0.704216
AGPAT3	1.32158e-05	-0.390481	-0.625433	-0.753798
RTN4IP1	-7.58193e-06	-0.382231	-0.697748	-0.780992
SFXN4	3.08921e-06	-0.393145	-0.690156	-0.801705
COX10	-1.06396e-05	-0.567732	-0.875589	-0.755779
NMRK2	-4.38386e-07	-0.558942	-0.826825	-0.7443
SLC25A12	2.47721e-05	-0.499816	-0.961817	-0.692558
MAN2A2	-7.49729e-06	-0.561747	-0.931688	-0.744917
GBX1	-7.40492e-06	-0.328953	-0.896355	-0.670272
NREP	3.85588e-06	-0.326395	-0.856345	-0.743268
KIF21A	1.35996e-07	-0.311771	-0.885586	-0.739373
COQ9	-2.09884e-05	-0.466543	-0.802465	-0.759432
HOOK2	2.7477e-07	-0.417536	-0.815319	-0.692081
PPARA	-1.07257e-05	-0.426558	-0.752376	-0.718772
WIPI1	-6.6603e-06	-0.598308	-0.76268	-0.63916
TECR	-5.41915e-06	-0.536108	-0.804006	-0.664701
ABLIM2	1.99168e-05	-0.499816	-0.818567	-0.52222
MACROD1	-2.62904e-06	-0.50162	-0.870555	-0.550992
GYS1	1.22653e-05	-0.477161	-0.813778	-0.577336
GFOD1	1.12352e-05	-0.478689	-0.796215	-0.640038
CHCHD3	-5.23591e-06	-0.45062	-0.80759	-0.621582
PPTC7	-9.57068e-06	-0.471856	-0.809876	-0.616895
TMEM164	-2.54551e-06	-0.381553	-0.824118	-0.539182
PABPC4	6.89476e-05	-0.448082	-0.855966	-0.515371
INSR	-1.52865e-05	-0.405838	-0.878751	-0.54746
RAB12	-1.66034e-05	-0.362404	-0.915646	-0.5897
PKIA	-2.01526e-05	-0.434912	-0.922949	-0.500086
WWP1	-2.50192e-05	-0.433575	-0.948845	-0.565302
ACACA	-3.63643e-05	-0.452401	-0.694708	-0.604593
SGK3	-1.59773e-05	-0.467469	-0.742248	-0.574259
TUBA4A	-1.11606e-05	-0.433906	-0.735497	-0.618897
SMPDL3A	-9.47718e-06	-0.420098	-0.743291	-0.577273
UBAC1	2.80638e-06	-0.327039	-0.7828	-0.633504
HSPB6	-3.44343e-06	-0.373178	-0.783668	-0.631443
CEP85	8.63648e-05	-0.334694	-0.738655	-0.555613
STAU2	-1.57651e-05	-0.372183	-0.730993	-0.585655
CD59	-0.56506	-0.637326	-1.18751	-0.983154
UBE2D1	-0.578561	-0.489803	-1.13491	-0.643529
EIF2B3	-0.325932	-0.4521	-0.617481	-0.503707
IDE	-0.321655	-0.367396	-0.659831	-0.572611
PLN	-0.46095	-0.424289	-0.519034	-0.758308
SIK2	-0.314043	-0.386081	-0.69427	-0.771304
COX7A1	-0.426168	-0.773713	-0.87875	-0.752203
IQCH-AS1	-0.288764	-0.529647	-0.886358	-0.828842
MAVS	-0.243417	-0.553692	-0.768033	-0.760976
VGLL2	-0.583128	-0.715609	-1.55446	-1.86079
LRRC20	-0.623537	-1.21168	-1.93683	-2.23508
NR4A1	-1.21101	-1.11125	-1.53748	-1.68361
FHOD1	-0.853554	-1.46606	-1.96661	-1.34485
ENO3	-7.37777e-06	-1.01358	-1.68526	-0.836637
SYNPO	-1.40627e-05	-1.01356	-1.66824	-0.534972
RAD23A	-7.17304e-06	-0.869311	-1.64282	-0.61466
DAAM2	-3.59768e-06	-1.4227	-1.91844	-1.36588
GPR157	-3.92817e-05	-1.03209	-2.19458	-1.35674
IMPA2	-2.50078e-05	-1.09087	-1.92879	-1.59202
DUSP3	-1.4346e-05	-0.803947	-1.665	-1.59476
SLC41A1	-2.496e-05	-0.902901	-1.5813	-1.13272
CKMT2	-3.04375e-05	-0.913134	-1.73251	-1.33961
SPEG	-7.78705e-06	-0.726541	-1.27087	-1.20602
TMEM143	-1.77725e-05	-0.754296	-1.37718	-1.10835
MKNK2	-6.14349e-06	-0.851251	-1.4459	-1.14522
TPM1	5.9977e-07	-0.474859	-1.69666	-1.13998
RORC	-0.00010881	-0.633343	-1.45942	-1.24432
ARHGEF6	9.86923e-06	-0.600498	-1.50457	-1.33859
NPR3	1.27382e-05	-0.0986506	-1.84674	-1.80752
RHOBTB1	-2.50268e-06	-0.080451	-1.21774	-1.59264
RYR3	-0.00017611	-0.133181	-1.53573	-1.45385
ACSL1	-0.445623	-0.48018	-0.892812	-1.63651
IDI1	-0.631698	-0.674336	-0.94942	-1.34235
SLC19A2	-0.538829	-0.65376	-1.38187	-1.47982
BCO2	-0.426408	-0.478093	-1.10835	-1.34626
LPIN1	-0.354003	-0.644624	-1.1461	-1.37928
LRRC2	-0.303726	-0.56119	-1.17907	-1.22349
RTN4RL1	-1.34146e-06	-0.548346	-0.977279	-1.92163
TCAP	-1.35719e-05	-0.549921	-1.17202	-1.86799
MYH2	2.11892e-06	-0.547703	-1.23151	-1.80189
PARVB	-1.62082e-05	-0.6076	-1.06568	-1.70938
ESRRA	-1.94804e-06	-0.558962	-1.10649	-1.6249
FTCDNL1	-1.05999e-05	-0.608658	-1.16055	-1.69392
SLC22A5	-7.08426e-06	-0.564588	-1.16069	-1.69823
ACTA1	-1.48616e-07	-0.831151	-1.29493	-1.75361
GAPDH	0.000152918	-0.808393	-1.36878	-1.6932
ZDHHC14	-4.46145e-06	-0.54317	-1.29922	-1.56695
TMEM233	-1.12522e-05	-0.552383	-1.24736	-1.60277
ALDOA	-1.76921e-05	-0.744857	-1.34122	-1.52453
BSG	-2.18952e-06	-0.68891	-1.34408	-1.58451
FHL3	-9.6067e-06	-0.719791	-1.23626	-1.67042
SH3RF3	1.53156e-06	-0.691212	-1.16946	-1.56552
BRICD5	8.0541e-06	0.61973	0.504094	-1.34457
ZNF436	4.36937e-05	0.371007	0.610289	-1.12598
GADL1	1.43442e-05	0.341634	0.54103	-1.12561
SPON2	1.20135e-06	0.280666	0.647057	-1.21314
PNMT	4.70957e-06	0.314763	0.667393	-1.24389
PPARGC1B	1.22267e-05	0.238093	0.59239	-1.2904
MYLK3	-7.83209e-06	0.204015	0.554537	-1.21269
CLCN5	0.390198	0.555608	0.787234	-1.04752
SEMA3C	9.45825e-06	0.634093	0.807444	-1.06727
RNF122	2.65202e-06	0.292343	0.730361	-0.986319
TSPAN9	1.80124e-05	0.383792	0.756602	-1.02197
SGSM2	6.69348e-06	0.425342	0.693036	-1.0131
SFRP4	1.8377e-06	0.503193	0.776689	-0.814133
FGD6	1.22962e-05	0.541982	0.676811	-0.934233
SPATS2	7.477e-06	0.480009	0.958656	-0.635707
MAP4K1	-0.000149889	0.567014	0.983125	-0.732745
AMY2B	1.30322e-05	0.657172	0.961684	-0.562169
ATP1B4	7.76133e-06	0.654487	0.818375	-0.571215
SLC4A7	1.66314e-05	0.620244	0.64355	-0.505288
GLRA1	6.19234e-06	0.3157	0.846092	-0.61341
MYH10	3.28998e-06	0.344982	0.698842	-0.694394
SNX1	0.405806	0.514181	0.52534	-0.624144
NFATC2	-1.06019e-05	0.0498211	0.516241	-0.668652
NAA40	1.60568e-05	0.200801	0.650887	-0.842155
HEY2	4.73411e-06	0.229638	0.549057	-0.848003
HOXB-AS1	1.43015e-06	0.199011	0.537277	-0.84407
SPSB4	5.42375e-06	0.282851	0.516959	-0.77859
MICAL3	1.97331e-05	0.237603	0.524961	-0.789423
CPT1A	-3.22761e-06	0.370833	0.54681	-0.91951
POLR2A	1.18517e-05	0.43009	0.611148	-0.810576
RBFOX2	2.55549e-05	0.410642	0.65872	-0.783388
SLC39A10	-1.37585e-07	0.284244	0.583375	-0.757948
NOSIP	2.61563e-05	0.346887	0.54486	-0.787419
BARD1	7.05298e-06	0.998172	0.535062	-0.632781
ANKRD1	1.98835e-06	1.3311	0.912065	-1.09574
ATP1A4	0.591463	0.921697	1.44529	-0.837291
SRGAP3	1.36365e-05	0.602582	1.16802	-0.936731
FAT2	1.81704e-06	0.777233	1.28456	-0.675643
SLC35F2	-1.69101e-06	0.849279	1.8193	-0.87796
CFH	6.8785e-06	0.982433	1.53057	-0.530865
GRAMD1B	1.15235e-05	0.833998	1.55088	-0.567118
NPHP1	0.610534	0.950628	0.610067	-2.85639
MMP2	3.5391e-06	0.33669	0.808486	-3.06156
TINAG	4.39666e-06	0.498676	0.942787	-2.65296
EYA2	4.01651e-06	0.385422	0.945441	-2.59052
SF3A3	1.12025e-05	0.367967	0.731413	-2.73551
MYL6B	6.64686e-06	0.246405	0.870571	-2.58209
CCDC63	4.14878e-07	0.581574	1.09338	-3.42923
KCNK2	3.95966e-06	0.594526	1.17624	-3.05351
HOGA1	2.88796e-06	0.726006	1.27903	-2.82393
ATXN7L2	1.03045	0.780385	0.874199	-1.82596
NOTUM	1.26813	1.10676	0.730193	-1.72295
MORN4	4.53393e-06	0.599747	1.19486	-1.57828
B3GALT5	3.54982e-06	0.634876	1.00066	-1.62244
ITIH4	6.91478e-07	0.264295	0.955827	-1.22656
LRRC7	4.45722e-06	0.426366	1.20189	-1.3027
TNFRSF19	7.0321e-06	0.597477	1.18582	-1.25558
ZNF273	1.80766e-06	0.197174	1.62729	-1.27832
IL31RA	1.15897e-06	0.116568	1.07378	-1.78253
OTX2-AS1	-2.7105e-06	0.045327	1.3883	-1.86498
PFKFB2	8.07324e-06	0.10059	0.576934	-2.02267
FSIP1	-2.66457e-07	0.124275	0.637819	-2.46011
CYB561D1	0.607631	0.411621	0.546099	-1.80321
LRRC3B	-1.79469e-06	-0.148565	0.690543	-1.46579
KREMEN1	-3.16808e-05	0.0831155	0.643402	-1.70094
CYP2J2	-4.19594e-05	0.301006	0.786754	-1.56287
NODAL	4.52118e-06	0.217365	0.693096	-1.48991
CRHR2	1.75457	2.07232	3.01087	-3.12331
HCN1	3.40625e-06	2.55473	3.58712	-0.777781
B4GALNT3	9.22029e-06	1.90612	2.70739	-1.96507
ADAMTSL1	1.08594e-05	0.720537	2.71	-2.1642
LRP1B	9.09347e-07	1.1898	2.05118	-2.09393
TENM1	9.55695e-06	1.2625	2.30323	-2.79505
LINC01091	0.560635	1.61522	2.16048	-0.795166
ATCAY	2.23213e-06	1.40402	2.30728	-0.718752
P2RY6	6.9338e-06	1.00332	1.47463	-1.41391
ZNF385C	6.76692e-06	0.990165	1.44927	-1.00909
FXYD7	9.98692e-07	0.891682	1.52073	-1.07744
DNAH3	5.03452e-06	1.40635	2.14446	-1.33043
SLC35F1	-8.67678e-06	0.778224	2.15698	-1.0142
SEC14L5	5.16372e-06	0.966973	2.21466	-1.22971
FOSB	-2.96287e-06	0.101406	-0.967111	0.77651
COX6A2	1.88824e-06	-0.412289	-0.625046	0.619827
STAT3	2.88519e-05	-0.416191	-0.582449	0.578624
NOMO1	2.76592e-06	-0.400168	-0.597588	1.14516
ODC1	-8.71705e-06	-0.416922	-0.741668	1.19185
NT5DC1	-1.83698e-05	-0.503598	-0.716183	1.07669
NDUFB9	-2.45737e-05	-0.421413	-0.725783	1.08149
MRAS	7.36913e-06	-0.146626	-0.586648	0.844317
GALK2	0.000122255	-0.273009	-0.537695	0.972977
BIN1	1.58963e-06	-0.230943	-0.538796	1.05448
LYRM2	7.2042e-06	-0.247568	-0.504903	1.06673
EIF2AK3	-1.92709e-06	-1.08236	-0.997368	0.826244
DNAJB6	-2.10529e-05	-0.587931	-1.16928	0.581672
MOB3B	-0.535764	-0.544609	-0.843897	1.12229
COX11	-0.440684	-0.461755	-0.80499	1.06924
DDX59	-1.13825e-05	-0.359205	-0.969592	1.08674
STRADB	-2.64992e-05	-0.614993	-1.09971	1.23575
GULP1	-0.553665	-0.398417	-0.605518	2.65119
CCDC85A	3.33684e-07	-0.472457	-0.535011	2.25826
ATF7IP2	-1.92099e-05	-0.379288	-0.611475	2.37716
STOM	-0.390788	-0.364005	-0.515937	1.37741
COL10A1	-1.28972e-05	-0.370133	-0.521332	1.30569
FGF9	-3.54681e-06	-0.462437	-0.540308	1.44076
NOMO2	1.05036e-05	-0.426782	-0.594174	1.47097
GAB3	-1.91136e-05	-0.282291	-0.504481	1.94694
MLLT3	-8.49748e-06	-0.420213	-0.596824	1.65202
LITAF	-1.60534e-05	-0.447401	-0.523201	1.7161
IGSF11	-3.57938e-06	-0.0105699	-0.753353	1.50565
PARM1	-1.48077e-06	-0.114751	-0.647196	1.6944
C2orf88	-4.35159e-06	-0.288942	-0.679292	1.60315
LMO2	-5.12442e-06	-0.313258	-0.671805	1.69588
HSPA4L	-1.89366e-05	-0.881342	-1.28502	2.02914
NETO2	-1.28639e-05	-0.616877	-1.09966	2.00586
BICD1	-0.795154	-0.615408	-0.730894	1.82567
TOM1L1	-0.712574	-0.767458	-1.02022	1.53652
ADAMTS9	5.66823e-06	0.45803	0.695615	0.509619
AKAP9	3.06745e-05	0.50576	0.661781	0.556623
NABP1	-1.19362e-06	0.406231	0.573671	0.626575
TFCP2	1.60609e-05	0.395383	0.617689	0.514241
FAT4	0.305208	0.426314	0.56795	0.789088
ARHGEF2	-0.000103672	0.420733	0.630117	0.966869
CSTF3	1.64783e-05	0.421395	0.570655	0.925618
SUCO	1.28097e-05	0.443816	0.50673	0.897459
LIMA1	2.23005e-05	0.507417	0.594611	0.835789
YPEL1	1.20278e-05	0.49423	0.552352	0.87393
GSN	-5.5751e-06	0.219509	0.622765	0.726031
ZNF562	2.37387e-06	0.403232	0.665884	0.750664
ZNRF2	0.336731	0.617756	0.906496	0.634774
MTSS1	0.290521	0.575909	0.709712	0.636183
APLF	6.40071e-06	0.510946	0.878372	0.703255
DLEU1	1.94998e-06	0.501834	0.86937	0.841862
ANP32B	1.22546e-05	0.689136	0.819595	0.840343
RPS6KA5	7.30355e-06	0.733874	0.730946	0.817191
PTPN21	-0.00102162	0.536749	0.722429	0.683646
SCPEP1	1.32097e-06	0.632761	0.688527	0.742587
TP63	2.40708e-05	0.65287	0.976037	0.516428
ANK3	-0.000190899	0.540748	0.882335	0.562077
ERRFI1	1.00133e-05	0.735919	1.00466	0.861375
AIG1	1.06189e-05	0.682342	1.09424	0.73694
MYLK	1.1237e-05	0.301296	0.858915	1.34772
CLEC2B	-1.10367e-05	0.249615	0.855794	1.24706
SLC35D2	6.91815e-06	0.358633	0.575226	1.37054
PRMT2	-2.44508e-06	0.325136	0.547232	1.28225
CNRIP1	7.37138e-06	0.252351	0.679447	1.43388
LINC00649	-8.63474e-06	0.158696	0.68554	1.37527
SGCE	8.59297e-06	0.521022	0.666042	1.19795
XYLT1	6.04576e-06	0.425991	0.771451	1.19289
TOX2	1.8642e-06	0.488979	0.771724	1.28991
NFKB2	6.79569e-06	0.303032	0.649217	1.14253
NOTCH2	6.29295e-06	0.311141	0.519066	1.10849
NRXN3	3.52993e-06	0.26489	0.528217	1.0892
NBPF14	5.97905e-05	0.493249	0.562158	1.04768
ACADL	3.45621e-06	0.515361	0.620974	1.11201
RBMS3	6.68463e-06	0.432528	0.624088	1.0973
SYNE1	7.75924e-05	0.463939	0.668683	1.08953
NAIP	8.39392e-06	0.477319	0.52757	1.15972
ZNF662	4.47829e-06	0.369556	0.542663	1.08937
TRAF3IP2-AS1	1.46505e-05	0.394444	0.502418	1.14942
ZFPM2	1.67974e-05	0.417194	0.552374	1.13544
RBMS3-AS3	-6.74924e-06	0.204256	0.691804	1.02765
C1orf167	-1.67058e-07	0.0372007	0.679085	1.09782
ZBTB46	6.18326e-05	0.129829	0.584532	1.10726
SORL1	-6.3637e-06	0.160035	0.511677	0.883227
STON2	9.06554e-06	0.117878	0.540836	0.897167
MAGED1	1.24218e-05	0.280131	0.522964	0.80037
SESTD1	-4.57696e-06	0.329617	0.567834	0.913474
SGMS2	8.77829e-06	0.246686	0.542082	0.896709
ARMC2	-9.15786e-07	0.509113	0.935298	0.936963
ZNF544	1.34106e-05	0.533071	0.935811	1.04214
SUPT3H	1.57001e-06	0.390517	0.781477	0.931645
ETS2	-1.15823e-05	0.415779	0.814222	0.928773
HMGN1	8.213e-06	0.511739	0.709001	0.945049
DAPP1	3.54776e-06	0.568983	0.756436	1.02458
FLRT2	-9.42001e-07	0.518233	0.767603	1.06342
TRIM38	-6.14518e-06	0.235587	0.853046	0.635137
CSPG4	1.22122e-05	0.241174	1.07044	0.799183
SLC3A1	0.624596	0.872364	1.58286	0.588833
LMO7	0.836821	1.14704	1.32138	0.786992
PDE5A	1.44474e-05	1.11908	1.81338	0.72647
CCDC39-AS1	4.44328e-06	1.72747	1.67049	0.714477
CCDC39	7.90899e-06	1.41866	1.27826	0.859826
MIR503HG	2.4039e-06	1.1669	1.45724	0.884034
RIMS2	2.12053e-06	0.163952	2.27759	1.47789
VWA5A	3.47302e-06	0.640848	1.58477	0.918248
GAS6-AS1	2.80394e-06	0.47657	1.79114	0.828853
PLAG1	5.04438e-06	0.588463	1.22161	0.831283
ABLIM1	5.18678e-05	0.438898	1.37963	0.777094
MAGED2	4.0062e-06	0.391984	1.19884	0.958075
PIP5K1B	3.02653e-06	0.565638	1.26625	1.12896
FAM174B	7.20985e-06	0.564069	1.18585	1.09458
FSD1L	8.11337e-06	0.76607	1.05796	1.01934
LINC01135	6.2465e-06	0.740384	0.985016	1.12039
ZNF667	8.15063e-06	0.679869	0.907206	1.14736
ZNF568	1.56751e-05	0.701361	1.11419	1.18676
IFITM10	1.38708e-06	0.784214	1.01076	1.30048
CACNG8	2.76381e-06	0.688964	0.999161	1.28943
XKR6	0.504391	0.580113	1.1413	1.05612
FREM2	0.493448	0.74796	1.1353	1.03413
GOLGA8A	0.473942	0.563972	0.944963	1.27312
EML6	0.534383	0.676864	0.982938	1.4557
CDC42EP3	0.567152	0.80432	1.09353	1.38535
PRR16	0.500353	0.79093	1.1096	1.34066
PRKD1	4.04561e-06	0.519628	1.1528	1.84171
FDXR	4.51192e-07	0.5059	1.1778	1.60805
L3MBTL4	1.72921e-07	0.558924	1.28752	1.60846
NAV3	2.782e-06	0.627363	1.1425	1.61712
LINC00598	1.25671e-05	0.60765	1.08577	1.71522
CCDC144NL	5.63479e-06	0.666281	1.10177	1.74864
KIF20B	9.07444e-06	0.675997	0.963808	1.61237
TTC8	2.99823e-06	0.699555	0.98442	1.64137
DYNC2H1	9.36463e-06	0.740179	1.06802	1.6737
ABCG2	3.08276e-06	0.742529	0.982916	1.71309
CDC25B	1.5921e-05	0.710357	1.00014	1.77875
PCDHGA1	2.96135e-06	0.860483	1.2206	1.63197
RUNX1	9.09644e-06	0.81107	1.14781	1.87015
ZNF385D	3.8617e-06	0.490828	1.58663	1.4358
LINC00504	4.45342e-06	0.683906	1.27981	1.54353
ST8SIA2	5.39049e-06	0.719826	1.34961	1.38778
ITGA3	0.283008	0.704475	1.40293	1.3101
PDGFC	9.12962e-06	0.863857	1.32145	1.19408
PPP1R14C	9.56845e-06	0.846668	1.18877	1.3287
HS3ST3A1	5.00673e-06	0.833814	1.08411	2.47494
EEF1A1	1.35473e-05	0.610754	1.08277	2.33666
PHYHIPL	-1.18075e-06	0.602421	1.06041	2.33806
PLXNB1	9.46686e-06	0.848025	1.32555	2.59795
PTPRF	8.54955e-07	0.606426	1.21971	2.71111
NCAM1	5.35694e-06	0.710501	1.22592	2.62298
ARAP2	1.21626e-06	0.695367	0.766228	2.53026
RAPH1	1.94206e-05	0.682948	0.884899	2.63852
EPB41L3	5.74251e-06	0.764264	0.761727	2.70186
RAI14	1.20065e-05	0.646584	0.773211	2.66447
FAS	3.90056e-06	0.56854	0.699418	2.68553
KIF2A	1.18303e-05	0.440076	0.721545	2.64689
ASTN2	5.57843e-06	0.513112	0.831826	2.68809
DZIP1	0.387686	0.72051	0.965667	2.82409
CAPN9	1.41108e-06	0.759215	0.818852	2.90861
NRCAM	3.51521e-06	0.816137	0.987618	2.73999
MTHFD1L	1.23651e-06	0.568226	0.95157	2.14885
RALYL	1.29609e-06	0.623801	0.824408	2.15871
EPHB1	1.12512e-05	0.455348	1.01153	2.0215
PCDHGB6	2.73284e-06	0.596445	1.00593	1.94158
ALPK1	0.000696271	0.677029	0.988842	2.06772
MEGF10	6.65004e-06	0.611619	0.952712	2.02253
KHDRBS2	1.40502e-06	0.321459	1.05697	2.10377
LINC00907	-4.32321e-08	0.220778	1.07343	2.10414
TUBA1A	7.62354e-06	0.377053	0.869827	2.36445
DAP	3.39775e-06	0.418671	0.869128	2.19855
TNFRSF21	1.26159e-05	0.455509	0.933702	2.28365
SLIT2	9.25349e-06	0.380532	0.527948	2.05968
SGTB	5.90075e-06	0.430152	0.569319	1.96913
TBC1D32	-2.9286e-07	0.444332	0.591458	2.0163
COL4A6	7.85329e-06	0.631077	0.740297	2.01508
PLEKHA2	7.15902e-06	0.478671	0.648982	2.13114
SYNE3	-8.39983e-07	0.41306	0.792747	2.08037
ADARB1	0.448731	0.536702	0.544471	2.28872
RUNX2	-5.33717e-07	0.615334	0.693292	2.4391
LCA5	1.22604e-05	0.59381	0.736617	2.33774
SLC16A2	1.6381e-05	0.460392	0.680836	2.30408
ARHGAP42	-1.24144e-06	0.468904	0.680809	2.35898
ABI3BP	-6.29772e-06	0.394574	0.593074	2.23602
PLEKHA5	8.76655e-05	0.48211	0.561421	2.2812
RGS2	-0.615001	0.0726098	0.940042	2.73733
HMGN5	9.32649e-08	0.127768	0.514522	2.3206
GPC5	-1.66302e-08	0.056195	0.537872	2.2419
IQCJ-SCHIP1	4.64592e-07	0.205518	0.5333	2.11845
NUDT14	1.12435e-05	0.274276	0.513218	2.23338
FGF2	-6.08477e-06	0.274261	0.824379	2.5566
EPB41L4B	-7.57474e-08	0.427993	0.660604	2.50986
PLA2R1	-5.80402e-06	0.354672	0.640958	2.42174
TRPM3	9.17814e-06	0.324661	0.642099	2.43059
VIM	-3.72318e-05	0.322507	0.635999	2.44614
COBLL1	-1.62959e-05	0.0830001	0.520949	2.57986
LAMA2	-1.64873e-05	0.216403	0.571528	2.42087
PARD6G	-3.37037e-06	0.301949	0.530411	2.38739
TSHZ3	0.395592	0.385415	0.553327	2.93461
MYOF	3.17205e-07	0.311226	0.724555	2.72317
PAPLN	4.60156e-06	0.330862	0.748557	2.81455
ANTXR1	-3.12298e-05	0.344162	0.517394	2.70959
LRP1	2.12222e-06	0.262896	0.591654	2.6568
BOC	1.10886e-05	0.447507	0.927613	2.81261
NTRK3	6.55561e-07	0.453034	0.911648	2.90289
S100A10	1.88671e-06	0.228	0.682074	2.96816
GALNT7	-5.65121e-07	0.445323	0.668921	2.97083
FREM1	6.6245e-06	0.422181	0.743553	2.93749
CYBRD1	-5.95825e-06	0.327853	0.600133	2.82795
VSTM4	1.36118e-05	0.410183	0.584652	2.92382
ABCA8	-1.12303e-06	0.330763	0.631264	2.93141
NUMBL	3.42104e-06	0.146479	0.593863	1.6194
SDC2	-5.25239e-06	0.130198	0.645848	1.5469
FREM2-AS1	3.22942e-06	0.176019	0.677406	1.56917
SLC47A2	4.81736e-07	0.276856	0.6013	1.53236
PTK2B	-1.87425e-06	0.32367	0.671842	1.62725
MDM2	-2.20338e-06	0.258278	0.718849	1.62439
MARCKS	1.18621e-05	0.345618	0.514123	1.71993
PLXNA3	4.14325e-06	0.265893	0.517525	1.738
CASQ2	-4.25668e-05	0.170611	0.551911	1.91472
ADAMTS7	6.2853e-06	0.157794	0.65825	1.75166
PCBP3	9.99255e-07	0.0875873	0.541714	1.70613
LINC00211	2.57029e-06	0.888169	0.801564	1.67881
BEST3	1.38965e-05	0.376399	0.941163	1.44506
CAB39L	1.27969e-06	0.457719	0.873558	1.53224
RALGPS2	2.80898e-06	0.68431	0.85296	1.37921
PCDHGA10	1.03328e-07	0.638186	0.901591	1.49833
GLI3	7.87152e-06	0.67103	0.982993	1.45671
EML5	-1.38036e-06	0.452717	0.504635	1.52952
HMBOX1	0.160144	0.394188	0.691999	1.44349
WDHD1	1.58556e-05	0.41404	0.715137	1.52676
KANK2	1.25275e-05	0.572656	0.727109	1.4651
ZNF135	6.68207e-07	0.402331	0.777705	1.69743
A4GALT	3.7679e-06	0.360962	0.759193	1.73278
TIAM1	5.25132e-06	0.608388	0.784685	1.67205
FAM102B	1.27682e-06	0.491091	0.68429	1.82823
CELF2-AS2	3.55742e-06	0.598526	0.610865	1.80311
ZFP82	2.08393e-05	0.564927	0.609121	1.78361
COL5A1	0.557012	0.763301	1.12842	2.04539
ADAM23	0.420747	0.830415	0.985028	1.66557
FAM13C	0.517713	0.86908	1.02803	1.63404
CSMD1	6.09504e-06	1.03489	1.0022	2.11728
PIEZO2	1.32075e-06	1.30464	1.15453	2.07421
PCDHB14	1.08754e-05	1.05367	1.56484	2.13369
THSD7A	1.06353e-05	0.950342	1.49686	2.15829
HOOK1	3.01478e-07	0.900725	1.20685	2.2708
GXYLT2	1.53085e-05	1.01765	1.28909	2.40569
PHEX	4.5801e-06	0.773972	1.64688	2.1022
RNASEH2B-AS1	1.75141e-06	0.690777	1.69547	1.97404
KLF5	4.55581e-06	0.803244	1.39653	2.11803
MAP3K7CL	6.44447e-06	0.766762	1.47038	1.8796
RNLS	-4.53635e-06	0.723078	1.25234	2.12611
ARHGAP28	6.28048e-06	0.613063	1.14706	2.13786
ITGA9	-8.26655e-07	0.448394	1.40663	2.33205
CALCRL	4.3241e-06	0.608501	1.39017	2.18772
KY	5.39882e-07	0.537174	1.27854	2.16096
SLC4A10	-7.81882e-07	0.232283	2.51185	2.70173
SRRM4	1.52729e-07	0.354742	1.57108	2.80399
ACTC1	1.62839e-06	0.311608	1.57471	2.53803
LINC00589	1.88388e-06	0.124303	2.1959	2.41534
SPAG6	4.78148e-07	0.18965	1.96164	2.14309
GABRB2	4.3311e-06	1.69172	1.37619	2.9179
DPP6	6.72558e-06	1.2981	2.12105	2.79293
GPC3	1.2675e-06	1.56232	2.02082	2.88244
FGFR2	9.10002e-07	1.72636	1.97763	2.98781
SNX7	4.47232e-06	1.61541	2.31722	3.0699
EFNA5	1.16692e-08	1.37323	2.18638	3.11441
PLA1A	8.87065e-07	1.65192	1.38219	1.64664
LINC01031	3.68521e-06	1.27573	1.82159	1.78617
SESN3	8.38641e-06	1.36197	1.69209	1.5957
CHRNA1	7.82977e-06	1.75086	2.177	2.08578
KCNH8	2.22436e-06	1.36583	1.78179	2.03771
DACT1	1.13016e-05	1.35748	1.81775	2.44694
LRTM1	1.74867e-06	1.1178	2.32463	2.26083
CDKN1A	3.35544e-07	0.746817	1.83344	2.37676
SIDT1	0.57216	1.06668	1.82036	1.80343
MEG3	0.556874	1.10462	1.60553	1.87755
C1orf105	4.6144e-06	0.974453	1.92891	1.54653
ZNF385D-AS1	2.51171e-06	0.782173	1.89884	1.74613
SCG2	2.10677e-06	5.66951	7.48741	5.25357
PEX5L-AS2	3.74283e-07	5.48848	6.05308	5.29065
CTNNA2	1.1536e-06	6.47724	6.34931	2.284
CDKN2A	7.52004e-07	6.73007	8.07622	2.09743
SMCO2	1.54401e-06	7.27305	8.37744	3.52732
LINC01038	3.09187	3.75338	4.87073	3.4985
LINC00382	2.50453	4.05578	5.06448	3.11266
ADAMTS20	2.12087	4.37838	5.5709	2.11052
ERBB3	2.2933	3.65781	5.31716	1.94434
PRSS12	3.43355e-06	3.44578	3.79471	3.45895
PCDH15	6.2891e-07	3.55924	4.21137	3.60214
GALNTL6	2.92361e-06	4.29181	5.26878	3.81078
NDST4	6.36833e-08	2.93335	5.10913	4.82211
ELAVL2	2.50371e-06	3.39154	4.98342	4.92669
DGKB	1.97332	1.7269	2.05128	3.38896
CCDC8	1.15766	1.85075	2.60354	3.27803
SCN5A	1.16453	1.52206	0.955888	2.91793
CHRNG	0.82186	1.529	2.10258	2.28
STK32A	0.850277	1.24966	2.0061	2.56363
MAPK4	0.667543	1.30747	2.11384	2.55156
MEG8	0.98318	1.29284	1.66091	2.66026
DAPK1	0.528897	1.10215	1.52588	2.69087
BRIP1	0.657358	0.908559	1.31031	2.68084
PROM1	0.566691	1.21661	1.58206	2.27254
TENM4	0.856227	1.0224	1.21625	2.33258
MED12L	1.55836	2.52441	2.8905	0.886508
MYH3	1.02571	2.10017	2.08734	0.679063
NUP210L	1.36002	1.78635	2.01723	1.81891
DKK2	1.13644	1.39822	1.8757	1.74456
FAM184B	0.884428	1.29099	2.10478	1.18344
FGF14	0.744459	1.30703	2.13187	1.76415
CHRND	1.21073	1.46911	1.41148	1.03858
PREPL	1.17979	1.41333	1.69827	0.720689
ZNF711	0.822567	1.64391	1.46047	1.5333
COL28A1	0.859747	1.08564	1.2615	1.28777
GADD45A	0.749464	1.36388	1.65074	1.17008
SLC16A10	0.623362	1.21675	1.45995	1.14556
DNAH8	3.25082e-06	2.5027	1.62091	1.8917
NPNT	8.93903e-06	1.75852	2.76484	1.23105
CALML6	3.06765e-06	1.43633	2.27914	1.4139
AKNAD1	2.9087e-06	1.19071	2.22042	1.18611
ARG2	-1.67262e-06	1.08983	2.03806	1.19672
GRM8	2.65131e-06	2.93104	3.4533	2.41401
KRT80	4.77186e-06	2.41719	3.50047	2.7466
KCNJ3	7.11093e-06	2.21493	2.54219	3.10833
CUX2	5.28534e-06	2.13039	3.10103	3.34915
CCSER1	0.869219	2.16796	2.43429	2.54938
COL21A1	1.04611	2.47891	3.12303	2.65118
LTK	1.18901	2.13125	2.95711	2.21081
PTPRD	1.13622e-05	1.77116	2.88238	1.98928
MTUS2	2.28125e-06	1.6918	2.57734	2.59325
CNTN3	3.21747e-06	1.60432	2.40008	2.30727
EDA2R	2.99182e-06	1.59437	2.36492	2.37072
LINC00466	1.77562e-06	1.69372	3.21601	2.41069
IGFL4	9.08832e-07	1.39535	3.53586	2.27491
SLC4A3	0.807174	1.38742	2.93237	1.7379
RPS6KA6	0.639344	1.81234	2.89455	1.65432
FST	1.38434	3.00497	4.02128	1.81325
NWD1	1.26259	3.224	4.27696	1.09691
PNPLA3	2.01725e-07	2.4185	3.15824	1.85525
LIPJ	3.18133e-06	2.56348	3.98387	2.08629
DLEU7	3.09024e-06	2.98662	3.66391	1.52298
EMCN	-1.35442e-05	-0.215803	-0.671374	5.40605
CAV1	-0.680486	-0.371246	-0.61537	4.04854
SOX7	-4.60213e-06	-0.478333	-0.646006	3.70415
HPSE2	-1.68182e-07	0.214897	1.17551	4.53743
HS3ST2	3.8168e-07	-0.0348591	0.979444	4.6492
AOX1	-4.73472e-06	-0.123063	0.785019	4.30115
VIT	9.39505e-07	0.315839	0.708153	4.30665
CTTNBP2	-2.20162e-06	0.252475	0.574592	4.58269
IGFBP6	2.14087e-06	0.244902	0.579369	4.54653
EVC2	6.54132e-06	0.507267	0.871317	4.3898
LPAR1	-5.12891e-06	0.555417	0.920097	4.32708
PLEKHH2	-3.372e-06	0.407452	1.02045	4.41994
ELN	1.43846e-06	0.56688	1.04178	4.37217
PTGFRN	8.20985e-06	0.715865	1.15906	4.00349
GLI1	5.56344e-06	0.58534	1.22248	4.06238
PEX5L	6.93661e-07	0.822962	1.05253	4.11465
SBSPON	3.82937e-06	0.840499	1.16131	4.25405
OLFML2A	0.280894	0.546625	0.597441	4.01194
OAF	1.58559e-05	0.631051	0.793675	3.98857
ITGA10	7.11431e-06	0.652209	0.625017	4.11192
MYEF2	1.13248e-06	0.554357	0.689796	4.13572
RGS13	-1.38441e-06	0.135304	0.84832	3.92001
EFEMP1	2.57514e-06	0.220504	0.812124	3.8643
ROBO2	-1.49697e-06	0.1476	0.712592	4.04187
RGS17	1.68677e-07	0.22307	0.782474	4.02157
ITGB4	9.8729e-07	0.23896	0.687818	3.98977
MRC2	9.23729e-06	0.382335	0.688535	3.8171
PLSCR4	-1.19596e-05	0.224237	0.541184	3.99292
PROS1	5.72282e-06	0.370249	0.593228	4.09324
MAMDC2	-3.59645e-06	0.091132	0.515889	3.33808
MAMDC2-AS1	-1.47602e-05	0.05517	0.679128	3.24398
BMPER	-1.7895e-06	0.0428026	0.528262	3.60088
SORBS2	4.54784e-06	0.252102	0.503204	3.61431
DCN	-1.39163e-05	0.176223	0.512925	3.46295
SVEP1	-9.81745e-06	0.299881	0.577279	3.43834
JAM3	3.20713e-07	0.286574	0.577501	3.43616
GLDN	5.49186e-08	0.137637	0.881867	2.92383
GPR39	6.16911e-07	0.0621111	0.840927	3.14758
NOVA1	-5.15842e-06	0.229955	0.911492	3.18635
CYP1B1	3.02054e-06	0.37733	0.861164	3.33528
HRH1	-2.49722e-06	0.282519	0.734525	3.47673
VAV3	1.36124e-05	0.523525	0.737739	3.20831
SCD5	-2.24994e-06	0.562537	0.73251	3.18618
HNMT	-1.38373e-06	0.338602	0.550721	3.12839
NRK	5.42657e-06	0.392358	0.697937	3.14162
CASC15	9.73377e-06	0.485415	0.50194	3.21877
RGL1	-7.78841e-06	0.352066	0.632879	3.30416
RNASEH2B	8.95186e-07	0.484246	0.62972	3.27829
PGR	4.39481e-06	1.07473	1.54742	3.30324
SPATA18	3.89206e-06	1.03387	1.79112	3.11344
DLEU2L	8.15914e-07	0.82471	1.63801	3.22522
MKX	1.61469e-06	0.802695	1.70656	3.18646
CDKN2B-AS1	-1.55782e-06	0.82788	1.3724	2.94785
MPP2	4.79446e-06	0.82766	1.23541	2.83666
EFCAB7	-5.74685e-06	0.532688	1.31723	3.00057
CPE	-3.61704e-06	0.526192	1.26675	3.02308
TP53I3	2.78815e-05	0.633303	1.07976	2.87286
PLXNB2	4.83418e-06	0.560673	1.17923	2.85774
MUSK	1.14151e-05	1.14546	1.3869	2.92338
DCDC1	-1.48206e-08	1.03246	1.06366	3.08965
PLCE1	1.18473e-05	0.84656	1.09022	3.24356
RFX8	2.27016e-06	0.489972	1.64323	3.14006
ATP8A2	4.42514e-06	0.33623	1.59921	3.14864
PAMR1	-8.29642e-06	0.116809	1.45575	3.25386
TWIST1	2.05591e-07	0.256798	1.64022	3.49426
VAT1L	1.42077e-06	0.197693	1.57887	3.43726
CRISPLD1	2.93153e-06	0.830515	1.20379	3.80343
TNFAIP8L3	-3.22127e-07	0.743445	1.19332	3.61152
SAMD12	1.84501e-06	0.777876	1.42474	3.48768
GPC6	1.18247e-05	1.05369	1.45128	3.65359
LSP1	-6.69968e-06	0.624404	0.990387	3.9438
BLNK	-4.79492e-07	0.461968	1.00332	3.83703
CNTN4	-4.33655e-06	0.214364	1.07528	3.79162
IGF1	6.73669e-06	0.246436	0.916603	3.66817
CYP1B1-AS1	9.37621e-06	0.619382	1.15121	3.31254
NCKAP5	-2.55303e-06	0.460479	1.26759	3.52066
SLC22A15	7.61259e-06	0.703332	0.806356	3.768
DCLK2	8.33041e-06	0.629504	0.799604	3.46825
PTCHD1	0.953876	1.2294	1.34261	5.26173
TMEFF2	0.834099	1.05224	1.35305	4.88427
PAK3	0.620752	0.931044	1.39165	5.2044
LINC01013	4.45308e-06	1.0869	2.4884	5.03976
PPM1E	-6.49421e-07	1.15826	2.1761	5.18189
BTNL8	4.64109e-06	1.51404	2.32037	5.40946
COL19A1	2.30251e-06	1.68762	2.01253	5.31804
KLRG2	4.56949e-07	0.0888916	2.32285	4.03266
NRXN1	-1.1603e-06	0.503997	1.3925	4.01795
OPCML	1.0525e-06	0.464019	1.44441	3.86952
PERP	-4.52679e-06	0.304129	1.6364	3.8506
TNNT2	7.92947e-07	0.214146	1.38549	4.0046
NRG1	9.06788e-08	0.165418	1.55213	4.12559
CHODL	6.91867e-06	1.34929	1.85101	4.08623
CLSTN2	7.4388e-06	0.895295	1.75579	3.82926
PLCE1-AS1	2.45969e-06	1.01719	1.58985	4.01852
SEZ6L	1.64278e-06	1.07902	1.80107	3.96354
PPP2R2B	1.43728e-06	0.753518	1.53584	4.63028
SUSD4	0.000104627	1.19791	1.43094	4.29349
RELN	2.36735e-06	1.14082	1.17487	4.44626
GRIK4	0.745144	0.777934	1.36491	3.64759
ITGBL1	0.736541	1.07759	1.72526	3.98495
CDH11	0.598929	1.25508	1.53509	3.76384
COL24A1	0.654832	1.67838	1.99949	3.65333
FAT1	0.676807	1.31045	1.77976	4.30675
DCLK1	0.543235	1.53985	1.73197	4.00635
KCNJ16	3.76202e-06	2.60277	2.60516	6.31528
LGR6	1.58436e-06	2.1855	2.50742	5.87503
TMEM200A	1.43862e-06	2.08249	2.86744	5.68723
NHLH2	1.05536e-06	2.62812	3.48234	6.21676
LINC00578	1.21888e-06	1.74076	3.19902	6.26614
ARHGAP36	2.86503e-06	1.75881	3.64334	3.98849
GALNT13	1.52104e-06	3.09617	3.87476	4.8553
DNAH11	3.09545e-06	2.97778	3.31468	5.36598
MYH8	1.98391	2.79262	3.56438	4.91148
ITGB8	0.962274	2.1674	2.6813	4.53147
CSMD3	1.30368	1.96838	2.31156	5.01851
TENM2	1.43	2.23992	3.38371	5.54272
SLC24A2	1.09482	1.86058	2.59474	5.90398
CLDN1	3.31029e-07	0.32315	2.44853	8.79647
EDIL3	1.85945e-06	1.29876	2.08985	7.74913
PDZRN4	-1.46135e-06	1.1196	2.01693	7.444
TLL1	-8.25725e-07	0.27657	0.550095	5.8071
CD28	-4.74289e-06	0.385796	0.608501	6.17607
EPHA3	-1.14736e-06	0.164561	0.573411	6.11047
KLHL2	1.33101e-06	0.747232	1.04482	5.35446
SLC44A3	7.57156e-07	0.868221	0.892771	5.72969
CNN3	1.35268e-05	0.778432	0.941143	5.60986
BANK1	-5.19699e-06	0.365985	1.43273	6.06979
SAMD3	-4.28555e-08	0.831389	1.14357	6.15736
ATP8B4	-8.14671e-06	0.659769	1.10256	6.17326
SLC44A5	1.26381e-06	0.319843	1.92257	5.36777
CNTN5	1.32098e-06	0.115904	1.38737	5.09774
PHLDB2	-2.52238e-07	0.376715	0.637575	5.46177
KCNMB4	4.60753e-07	0.21884	0.675892	5.38318
EBF2	5.9801e-06	0.208585	0.533172	4.89587
FBLN1	-4.54056e-06	0.244317	0.620011	4.97808
TP73	3.86293e-07	0.201703	0.812927	4.80028
MFAP5	-3.74716e-06	0.313029	0.726159	4.94595
KYNU	-7.44172e-06	0.716379	1.77646	7.01026
PTGFR	-1.9885e-06	0.409673	1.25948	7.22112
TNR	2.07452e-08	0.0654054	1.34223	6.90986
SLC2A1	6.0647e-06	1.24671	2.15107	6.19458
CERKL	2.63781e-07	0.291717	2.71956	6.09337
