# Supplementary material for: MBNL Depletion Induces Muscle Stem Cell Activation and Myofibre Fusion while Impairing Myonuclear Maturation in Myotonic Dystrophy Type 1
Source: Research Square preprint supplement (doi:10.21203/rs.3.rs-7311936/v1), 2025-08-13
Supplement: Supplementary file 2 [file 263916fcf685a907258e3ab8.pdf]

Supplementary Figure S2

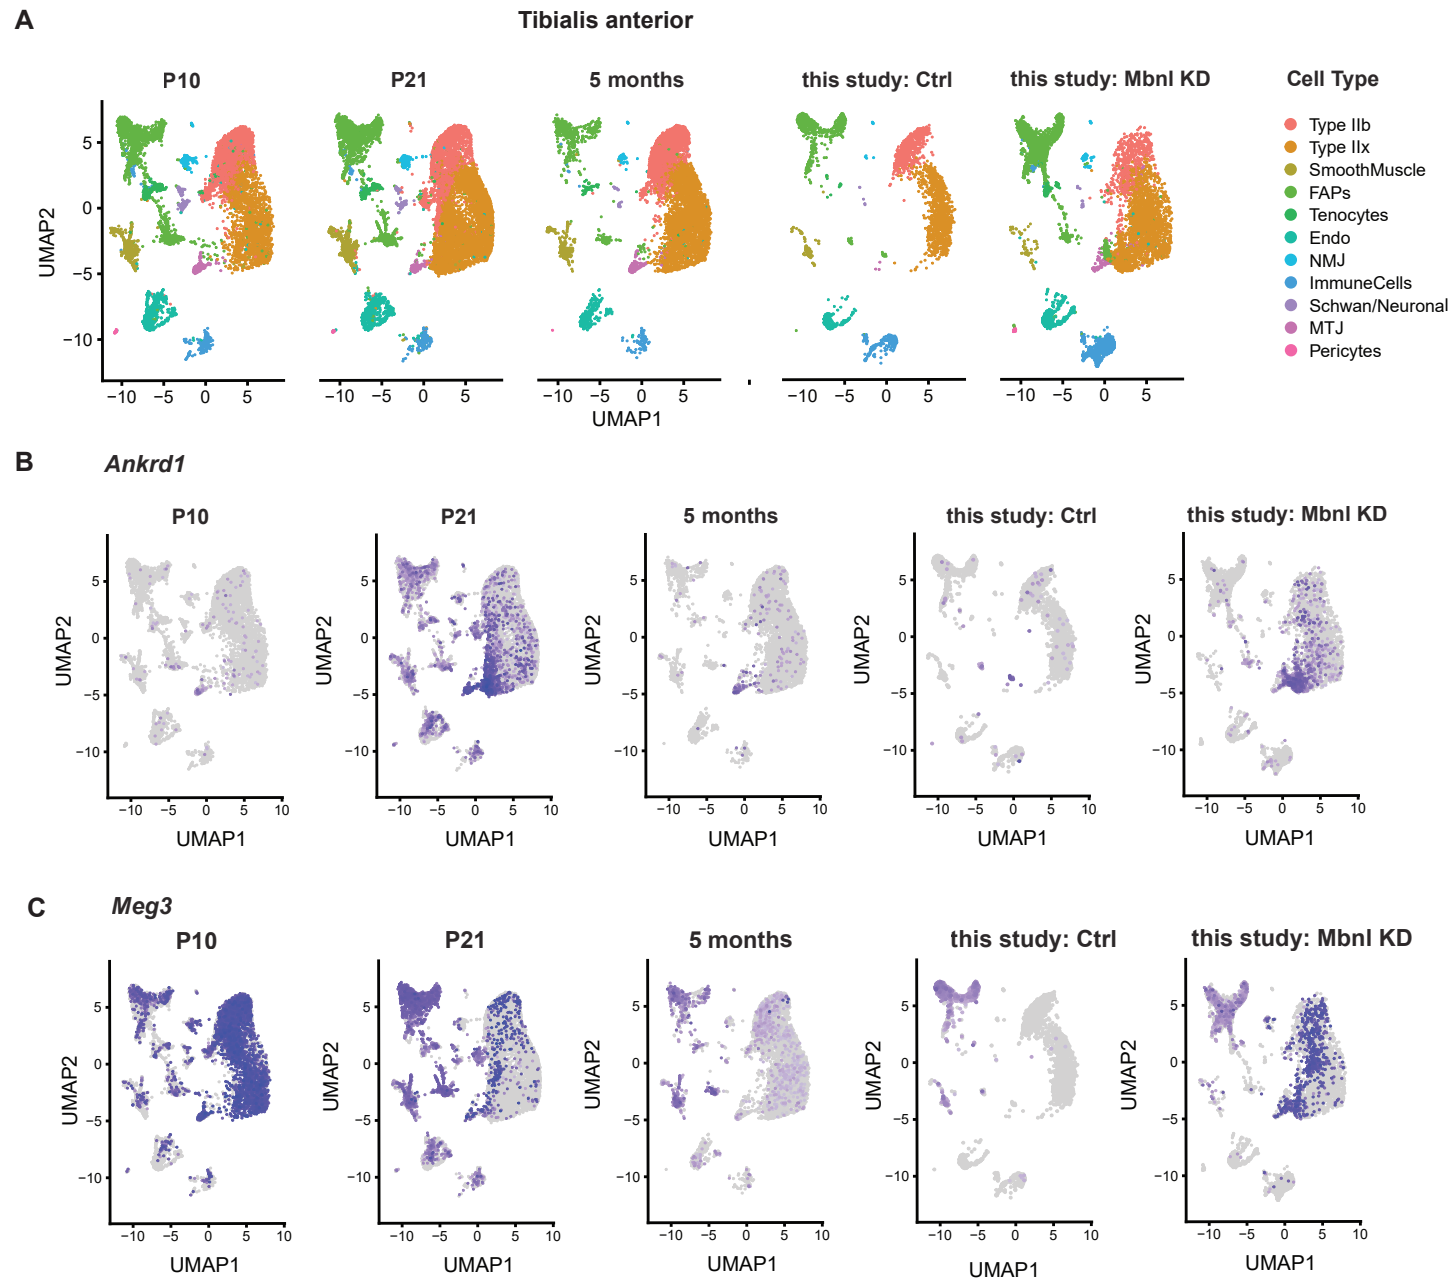

Comparison of *Meg3* and *Ankrd1* transcriptional clusters with muscle developmental signatures **(A)** UMAP of the integrated data between the TA snRNA-seq from *Petrany* et al at P10, P21 and 5-month and the Ctrl and MBNL-KD TA muscles from this study. Each point represents a single-nucleus and is coloured by the cell-identity. **(B-C)** UMAPs as in (A). Each point is coloured by the intensity of *Ankrd1* and *Meg3* expression and represents a single nucleus. Dot plot of the different cell types and their expression of the key marker genes representing *Ankrd1* (B) and *Meg3* (C) clusters over development and compared to the data found in this study.
