# Supplementary material for: MBNL Depletion Induces Muscle Stem Cell Activation and Myofibre Fusion while Impairing Myonuclear Maturation in Myotonic Dystrophy Type 1
Source: Research Square preprint supplement (doi:10.21203/rs.3.rs-7311936/v1), 2025-08-13
Supplement: Supplementary file 3 [file 55dc4b6410a79937a046a859.pdf]

## Supplementary Figure S8

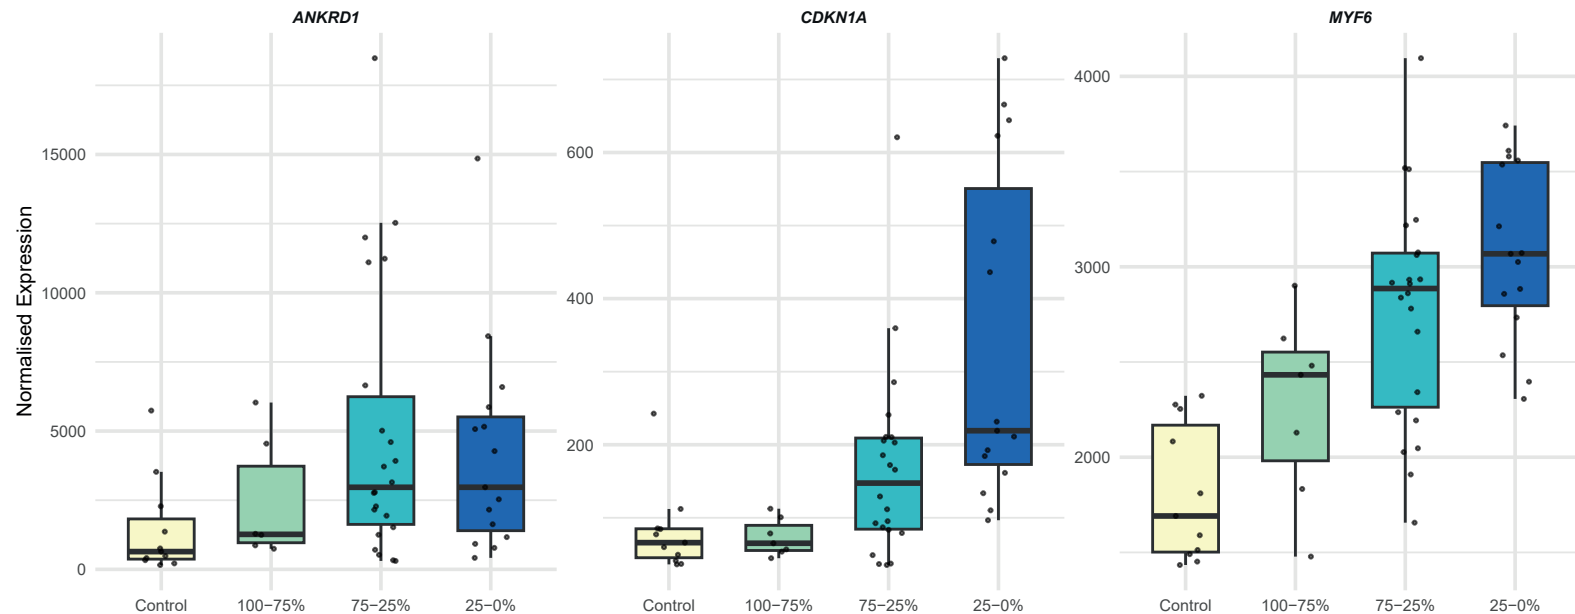

Expression of *ANKRD1*, *CDKN1A*, and *MYF6* genes analysed in a bulk RNA-seq dataset from unrelated DM1 patients (9 controls, 43 patients). Patients were stratified by dorsiflexion strength into three clinical groups: 100–75% (mild/proto-DM1), 75–25% (classic DM1), and 25–0% (severe DM1).
