# Supplementary material for: MBNL Depletion Induces Muscle Stem Cell Activation and Myofibre Fusion while Impairing Myonuclear Maturation in Myotonic Dystrophy Type 1
Source: Research Square preprint supplement (doi:10.21203/rs.3.rs-7311936/v1), 2025-08-13
Supplement: Supplementary file 3 [file 79bfc6a1c5d8216d7e0ac5cc.xlsx]

## Sheet: Tabelle1
Supplementary Table T4. Antibodies used in this study
Antibodies	Supplyer	Reference number
Anti-PAX7	Santa Cruz	sc-81648
Anti-Ki67	Abcam	ab15580
Anti-Caveolin3	Santa Cruz	sc-7665
Anti-Myosin heavy chain (Type IIX)	DSHB	6H1
Anti-Myosin heavy chain (Type I)	DSHB	BA-D5
Anti-Myosin heavy chain (Type IIA)	DSHB	SC-71
Anti-CD8 alpha	Abcam	ab60076
Anti-CD68	DAKO	M0814
Anti-p21	Santa Cruz	sc-397
Anti-CD56 (NCAM1)	Milteny Biotec	130-113-307
Anti-Myosin heavy chain (embryonic)	DSHB	F1.652
