# Supplementary material for: MBNL Depletion Induces Muscle Stem Cell Activation and Myofibre Fusion while Impairing Myonuclear Maturation in Myotonic Dystrophy Type 1
Source: Research Square preprint supplement (doi:10.21203/rs.3.rs-7311936/v1), 2025-08-13
Supplement: Supplementary file 4 [file b948ac4bb050b2842fe3760c.xlsx]

## Sheet: rMATS Analysis Mbnl KD vs Ctrl
Supplementary Table T1. RNAseq analysis on Mbnl KD and Ctrl TA muscles 10 weeks PI (rMATS analysis)
rowID	GeneID	geneSymbol	chr	strand	IncLevel_10W Ctrl_1	IncLevel_10W Ctrl_2	IncLevel_10W Ctrl_3	IncLevel_10W Mbnl KD_1	IncLevel_10W Mbnl KD_2	IncLevel_10W Mbnl_3	dPSI	PValue	FDR	Type	alternative_exon_coordinates
A5SS.323	ENSMUSG00000021027.17	Ralgapa1	chr12	-	0.963	1	0.916	0.419	0.512	0.411	0.512	0	0	A5SS	55719583-55719708~55721405-55722773~55722773-55722941
A5SS.1283	ENSMUSG00000029478.16	Ncor2	chr5	-	0.272	0.267	0.193	0.815	0.722	0.792	-0.532	0	0	A5SS	125018810-125018990~125019818-125019959~125019959-125020046
A5SS.1372	ENSMUSG00000030852.18	Tacc2	chr7	+	0.946	0.96	0.954	0.412	0.421	0.446	0.527	0	0	A5SS	130734948-130735150~130735150-130735228~130739811-130739873
A5SS.1373	ENSMUSG00000030852.18	Tacc2	chr7	+	0.903	0.925	0.904	0.305	0.303	0.328	0.599	0	0	A5SS	130734948-130735150~130735150-130735243~130739811-130739873
MXE.295	ENSMUSG00000005583.16	Mef2c	chr13	+	0.26	0.228	0.198	0.612	0.506	0.605	-0.346	0	0	MXE	83592777-83592981~83625264-83625408;83625469-83625607~83633054-83633241
MXE.367	ENSMUSG00000079055.10	Slc8a3	chr12	-	0.883	0.874	0.842	0.114	0.372	0.128	0.662	0	0	MXE	81204891-81205016~81214065-81214169;81216720-81216827~81314259-81316104
MXE.497	ENSMUSG00000025871.18	4833439L19Rik	chr13	-	0.139	0.113	0.113	0.407	0.532	0.443	-0.339	0	0	MXE	54556367-54556651~54559197-54559324;54564514-54564621~54565181-54565338
MXE.498	ENSMUSG00000025871.18	4833439L19Rik	chr13	-	0.112	0.103	0.138	0.413	0.484	0.424	-0.323	0	0	MXE	54559197-54559324~54561692-54561871;54564184-54564272~54564514-54564621
MXE.544	ENSMUSG00000026950.18	Neb	chr2	-	0.04	0.042	0.047	0.001	0.002	0.004	0.041	0	0	MXE	52149093-52149277~52149589-52149697;52160655-52160748~52162067-52162172
MXE.551	ENSMUSG00000026950.18	Neb	chr2	-	0.527	0.484	0.618	0.069	0.094	0.093	0.458	0	0	MXE	52149589-52149697~52150536-52150629;52151363-52151456~52159476-52159569
MXE.555	ENSMUSG00000026950.18	Neb	chr2	-	0.476	0.51	0.516	0.252	0.3	0.2	0.25	0	0	MXE	52150536-52150629~52150966-52151059;52153055-52153148~52153682-52153775
MXE.563	ENSMUSG00000026950.18	Neb	chr2	-	0.391	0.39	0.295	0.913	0.887	0.904	-0.543	0	0	MXE	52149589-52149697~52151363-52151456;52157831-52157924~52159476-52159569
MXE.564	ENSMUSG00000026950.18	Neb	chr2	-	0.745	0.76	0.708	0.976	0.965	0.958	-0.229	0	0	MXE	52149589-52149697~52151363-52151456;52159476-52159569~52160655-52160748
MXE.565	ENSMUSG00000026950.18	Neb	chr2	-	0.229	0.24	0.229	0.091	0.133	0.096	0.126	0	0	MXE	52150966-52151059~52151363-52151456;52153055-52153148~52153682-52153775
MXE.572	ENSMUSG00000026950.18	Neb	chr2	-	0.483	0.485	0.491	0.131	0.165	0.148	0.338	0	0	MXE	52150536-52150629~52153055-52153148;52153682-52153775~52157290-52157383
MXE.587	ENSMUSG00000026950.18	Neb	chr2	-	0.197	0.199	0.137	0.642	0.611	0.674	-0.465	0	0	MXE	52153055-52153148~52153682-52153775;52156354-52156447~52157290-52157383
MXE.588	ENSMUSG00000026950.18	Neb	chr2	-	0.311	0.361	0.313	0.698	0.603	0.756	-0.357	0	0	MXE	52153055-52153148~52153682-52153775;52157290-52157383~52157831-52157924
MXE.589	ENSMUSG00000026950.18	Neb	chr2	-	0.571	0.53	0.55	0.805	0.724	0.831	-0.236	0	0	MXE	52153055-52153148~52153682-52153775;52157831-52157924~52159476-52159569
MXE.597	ENSMUSG00000026950.18	Neb	chr2	-	0.894	0.884	0.86	0.997	0.994	0.986	-0.113	0	0	MXE	52151363-52151456~52160655-52160748;52161370-52161475~52162067-52162172
MXE.776	ENSMUSG00000028402.18	Mpdz	chr4	-	0.784	0.799	0.814	0.414	0.259	0.344	0.46	0	0	MXE	81310156-81310319~81313499-81313598;81317593-81317704~81320345-81320523
MXE.888	ENSMUSG00000018411.17	Mapt	chr11	+	0.715	0.515	0.477	0	0	0	0.569	0	0	MXE	104282367-104282480~104287122-104287209;104294858-104294924~104302360-104302410
MXE.1184	ENSMUSG00000026407.17	Cacna1s	chr1	+	0	0.003	0.003	0.47	0.405	0.428	-0.432	0	0	MXE	136101478-136101562~136105447-136105576;136105783-136105849~136106401-136106493
MXE.1231	ENSMUSG00000039844.20	Rapgef1	chr2	+	0.572	0.643	0.57	0.948	0.941	0.85	-0.318	0	0	MXE	29707197-29707400~29719592-29719850;29720642-29720738~29722223-29722309
MXE.1258	ENSMUSG00000020458.16	Rtn4	chr11	+	0.037	0.03	0.03	0.385	0.304	0.363	-0.318	0	0	MXE	29705534-29705591~29706409-29708770;29733632-29733840~29736359-29736498
MXE.1333	ENSMUSG00000061462.18	Obscn	chr11	-	0.146	0.171	0.21	0.415	0.317	0.435	-0.213	0	0	MXE	59052444-59052711~59053573-59053837;59062030-59062294~59062646-59062910
MXE.1484	ENSMUSG00000051747.15	Ttn	chr2	-	0.976	0.981	0.975	0.916	0.93	0.875	0.07	0	0	MXE	76856264-76856366~76857903-76857987;76859913-76859997~76861096-76861177
MXE.1910	ENSMUSG00000039126.10	Prune2	chr19	+	1	1	1	0.394	0.241	0.417	0.649	0	0	MXE	17208230-17208329~17211677-17211713;17212291-17212330~17216325-17216373
MXE.2017	ENSMUSG00000061723.18	Tnnt3	chr7	+	0.696	0.937	0.873	0.079	0.087	0	0.78	0	0	MXE	142504047-142504065~142505515-142505530;142507749-142507788~142508334-142508353
MXE.2018	ENSMUSG00000061723.18	Tnnt3	chr7	+	0.632	0.92	0.821	0	0	0	0.791	0	0	MXE	142505287-142505299~142505515-142505530;142507749-142507788~142508334-142508353
MXE.2019	ENSMUSG00000061723.18	Tnnt3	chr7	+	0.116	0.075	0.081	0.01	0.02	0.015	0.076	0	0	MXE	142512531-142512622~142513664-142513705;142514325-142514366~142515775-142515830
MXE.2035	ENSMUSG00000031636.7	Pdlim3	chr8	+	0.102	0.112	0.118	0.69	0.437	0.694	-0.496	0	0	MXE	45900474-45900559~45908468-45908656;45909018-45909086~45915128-45915259
MXE.2060	ENSMUSG00000001419.17	Mef2d	chr3	+	0.286	0.266	0.212	0.8	0.736	0.794	-0.522	0	0	MXE	88156321-88156525~88158033-88158171;88158220-88158355~88159121-88159332
MXE.2081	ENSMUSG00000021493.15	Pdlim7	chr13	-	0.117	0.165	0.121	0.504	0.672	0.609	-0.461	0	0	MXE	55507487-55507624~55507863-55507880;55508207-55508326~55508779-55508810
MXE.2108	ENSMUSG00000032294.17	Pkm	chr9	+	0.985	0.989	0.981	0.93	0.958	0.925	0.047	0	0	MXE	59671920-59672073~59675028-59675195;59675567-59675734~59678043-59678225
RI.2739	ENSMUSG00000021493.15	Pdlim7	chr13	-	0.966	0.943	0.934	0.782	0.754	0.725	0.194	0	0	RI	55506305-55506367~55506305-55507366~55507329-55507366
SE.92	ENSMUSG00000031422.16	Morf4l2	chrX	-	0.477	0.521	0.594	0.892	0.886	0.917	-0.368	0	0	SE	136732941-136734501~136735545-136735622~136739804-136739894
SE.704	ENSMUSG00000024603.8	Dctn4	chr18	+	0	0	0	0.482	0.637	0.503	-0.541	0	0	SE	60544038-60544146~60545356-60545377~60545747-60545821
SE.735	ENSMUSG00000024969.15	Mark2	chr19	-	0.083	0.165	0.138	0.605	0.661	0.778	-0.553	0	0	SE	7280997-7281255~7281797-7281959~7282725-7282818
SE.762	ENSMUSG00000024381.16	Bin1	chr18	+	0.015	0.003	0.008	0.371	0.267	0.388	-0.333	0	0	SE	32414182-32414290~32414944-32415037~32419842-32419928
SE.766	ENSMUSG00000024381.16	Bin1	chr18	+	0.373	0.409	0.335	0.655	0.695	0.695	-0.309	0	0	SE	32424819-32424967~32431670-32431742~32431982-32432093
SE.983	ENSMUSG00000024049.15	Myom1	chr17	+	0.037	0.058	0.047	0.362	0.321	0.383	-0.308	0	0	SE	71080773-71080895~71082202-71082496~71084237-71084434
SE.1216	ENSMUSG00000056692.13	Ilrun	chr17	-	0.909	0.9	0.963	0.769	0.741	0.693	0.19	0	0	SE	27751234-27753995~27767910-27768239~27786070-27786268
SE.1417	ENSMUSG00000022892.11	App	chr16	-	0.85	0.86	0.707	0.299	0.18	0.187	0.584	0	0	SE	85030231-85030365~85040250-85040307~85056323-85056526
SE.1418	ENSMUSG00000022892.11	App	chr16	-	0.96	0.952	0.904	0.599	0.513	0.534	0.39	0	0	SE	85030231-85030365~85043575-85043743~85056323-85056526
SE.1727	ENSMUSG00000022789.15	Dnm1l	chr16	-	0.157	0.19	0.116	0.923	0.847	0.808	-0.705	0	0	SE	16316601-16316778~16318763-16318841~16319451-16319508
SE.2623	ENSMUSG00000021798.14	Ldb3	chr14	-	0.178	0.158	0.096	0.958	0.988	0.946	-0.82	0	0	SE	34552176-34552322~34555342-34555528~34566856-34566893
SE.2624	ENSMUSG00000021798.14	Ldb3	chr14	-	0.872	0.866	0.838	0.967	0.99	0.957	-0.113	0	0	SE	34567397-34567567~34569712-34569727~34571717-34571921
SE.2625	ENSMUSG00000021798.14	Ldb3	chr14	-	0.945	0.938	0.879	0.32	0.226	0.203	0.671	0	0	SE	34567397-34567567~34569712-34569727~34576985-34577344
SE.2628	ENSMUSG00000021798.14	Ldb3	chr14	-	0.038	0.038	0.03	0.142	0.145	0.091	-0.091	0	0	SE	34572989-34573012~34576985-34577344~34578594-34578670
SE.2977	ENSMUSG00000005583.16	Mef2c	chr13	+	0.091	0.05	0.061	0.288	0.202	0.261	-0.183	0	0	SE	83592777-83592981~83625264-83625324~83625469-83625607
SE.3595	ENSMUSG00000079055.10	Slc8a3	chr12	-	0.824	0.803	0.759	0.079	0.369	0.09	0.616	0	0	SE	81214065-81214169~81216720-81216827~81314259-81316104
SE.3742	ENSMUSG00000035247.16	Hectd1	chr12	-	0.379	0.376	0.385	0.833	0.752	0.858	-0.434	0	0	SE	51754214-51754422~51754920-51755103~51757046-51757101
SE.4285	ENSMUSG00000038485.6	Socs7	chr11	+	0.303	0.263	0.201	0.935	0.92	0.921	-0.67	0	0	SE	97373065-97373130~97376996-97377098~97377935-97378066
SE.4286	ENSMUSG00000038485.6	Socs7	chr11	+	0.574	0.5	0.596	0.925	0.986	0.94	-0.394	0	0	SE	97376436-97376541~97376996-97377098~97377935-97378066
SE.4981	ENSMUSG00000025871.18	4833439L19Rik	chr13	-	0.083	0.058	0.074	0.598	0.593	0.49	-0.489	0	0	SE	54561707-54561871~54564509-54564621~54565181-54565325
SE.4982	ENSMUSG00000025871.18	4833439L19Rik	chr13	-	0.214	0.318	0.396	0.894	0.918	0.873	-0.586	0	0	SE	54564184-54564272~54564509-54564621~54565181-54565325
SE.4985	ENSMUSG00000025871.18	4833439L19Rik	chr13	-	0.102	0.07	0.076	0.633	0.619	0.536	-0.513	0	0	SE	54561692-54561871~54564514-54564621~54565181-54565303
SE.4986	ENSMUSG00000025871.18	4833439L19Rik	chr13	-	0.365	0.519	0.609	0.951	0.96	0.939	-0.452	0	0	SE	54564184-54564272~54564514-54564621~54565181-54565303
SE.5291	ENSMUSG00000020061.18	Mybpc1	chr10	-	0.976	0.985	0.988	0.898	0.897	0.905	0.083	0	0	SE	88518278-88518569~88519900-88519943~88522966-88523153
SE.5292	ENSMUSG00000020061.18	Mybpc1	chr10	-	0.938	0.963	0.963	0.828	0.802	0.824	0.137	0	0	SE	88518338-88518569~88521276-88521335~88522966-88523153
SE.5293	ENSMUSG00000020061.18	Mybpc1	chr10	-	0.799	0.826	0.781	0.919	0.93	0.957	-0.133	0	0	SE	88519900-88519943~88521276-88521335~88522966-88523153
SE.5294	ENSMUSG00000020061.18	Mybpc1	chr10	-	0.013	0.009	0.013	0.054	0.033	0.085	-0.046	0	0	SE	88536314-88536482~88537465-88537519~88540948-88541083
SE.5298	ENSMUSG00000020061.18	Mybpc1	chr10	-	0.646	0.573	0.471	0.963	0.946	0.951	-0.39	0	0	SE	88573415-88573529~88582006-88582048~88585659-88585695
SE.5617	ENSMUSG00000026950.18	Neb	chr2	-	0.972	0.972	0.946	0.996	0.995	0.995	-0.032	0	0	SE	52149589-52149697~52150536-52150629~52150966-52151059
SE.5618	ENSMUSG00000026950.18	Neb	chr2	-	0.484	0.528	0.414	0.936	0.912	0.901	-0.441	0	0	SE	52149589-52149697~52150536-52150629~52151363-52151456
SE.5623	ENSMUSG00000026950.18	Neb	chr2	-	0.555	0.582	0.481	0.964	0.947	0.952	-0.415	0	0	SE	52149589-52149697~52150966-52151059~52151363-52151456
SE.5629	ENSMUSG00000026950.18	Neb	chr2	-	0.865	0.852	0.832	0.94	0.931	0.948	-0.09	0	0	SE	52150536-52150629~52150966-52151059~52151363-52151456
SE.5644	ENSMUSG00000026950.18	Neb	chr2	-	1	0.988	1	0.729	0.664	0.64	0.318	0	0	SE	52150536-52150629~52151363-52151456~52157290-52157383
SE.5645	ENSMUSG00000026950.18	Neb	chr2	-	0.967	0.965	0.955	0.643	0.694	0.615	0.312	0	0	SE	52150536-52150629~52151363-52151456~52157831-52157912
SE.5646	ENSMUSG00000026950.18	Neb	chr2	-	0.95	0.893	0.945	0.621	0.547	0.623	0.332	0	0	SE	52150536-52150629~52151363-52151456~52159476-52159569
SE.5670	ENSMUSG00000026950.18	Neb	chr2	-	0.822	0.798	0.761	0.944	0.97	0.936	-0.156	0	0	SE	52151363-52151456~52153055-52153148~52157831-52157912
SE.5671	ENSMUSG00000026950.18	Neb	chr2	-	0.653	0.644	0.548	0.957	0.96	0.953	-0.342	0	0	SE	52151363-52151456~52153055-52153148~52159476-52159569
SE.5673	ENSMUSG00000026950.18	Neb	chr2	-	1	0.952	1	0.392	0.455	0.256	0.616	0	0	SE	52150536-52150629~52153682-52153775~52157290-52157383
SE.5674	ENSMUSG00000026950.18	Neb	chr2	-	0.876	0.85	0.826	0.258	0.283	0.185	0.609	0	0	SE	52150536-52150629~52153682-52153775~52157831-52157912
SE.5685	ENSMUSG00000026950.18	Neb	chr2	-	0.953	0.959	0.961	0.356	0.413	0.371	0.578	0	0	SE	52153055-52153148~52153682-52153775~52156354-52156447
SE.5686	ENSMUSG00000026950.18	Neb	chr2	-	0.866	0.889	0.874	0.441	0.524	0.475	0.396	0	0	SE	52153055-52153148~52153682-52153775~52157290-52157383
SE.5687	ENSMUSG00000026950.18	Neb	chr2	-	0.566	0.642	0.592	0.333	0.381	0.317	0.256	0	0	SE	52153055-52153148~52153682-52153775~52157831-52157912
SE.5689	ENSMUSG00000026950.18	Neb	chr2	-	0.782	0.813	0.69	0.118	0.107	0.154	0.635	0	0	SE	52153055-52153148~52154569-52154662~52156354-52156447
SE.5690	ENSMUSG00000026950.18	Neb	chr2	-	0.215	0.298	0.263	0.052	0.026	0.076	0.207	0	0	SE	52153055-52153148~52154569-52154662~52157290-52157383
SE.5705	ENSMUSG00000026950.18	Neb	chr2	-	0.017	0.013	0.04	0.166	0.209	0.216	-0.174	0	0	SE	52151363-52151456~52156354-52156447~52157831-52157924
SE.5708	ENSMUSG00000026950.18	Neb	chr2	-	0.035	0.033	0.045	0.328	0.329	0.289	-0.278	0	0	SE	52153055-52153148~52156354-52156447~52157831-52157924
SE.5709	ENSMUSG00000026950.18	Neb	chr2	-	0.188	0.115	0.091	0.643	0.737	0.827	-0.604	0	0	SE	52153055-52153148~52156354-52156447~52159476-52159569
SE.5718	ENSMUSG00000026950.18	Neb	chr2	-	0.469	0.523	0.397	0.809	0.873	0.84	-0.378	0	0	SE	52151363-52151456~52157290-52157383~52157831-52157912
SE.5720	ENSMUSG00000026950.18	Neb	chr2	-	0.686	0.758	0.693	0.923	0.939	0.946	-0.224	0	0	SE	52153682-52153775~52157290-52157383~52157831-52157912
SE.5723	ENSMUSG00000026950.18	Neb	chr2	-	0.917	0.911	0.821	0.998	0.962	0.995	-0.102	0	0	SE	52149589-52149697~52157831-52157924~52159476-52159569
SE.5726	ENSMUSG00000026950.18	Neb	chr2	-	0.523	0.516	0.44	0.918	0.91	0.922	-0.424	0	0	SE	52151363-52151456~52157831-52157924~52159476-52159569
SE.5735	ENSMUSG00000026950.18	Neb	chr2	-	0.896	0.895	0.855	0.998	0.993	0.994	-0.113	0	0	SE	52160655-52160748~52161370-52161475~52162067-52162172
SE.5736	ENSMUSG00000026950.18	Neb	chr2	-	0.917	0.922	0.911	0.988	0.98	0.984	-0.067	0	0	SE	52162904-52163009~52163936-52164050~52164591-52164702
SE.5738	ENSMUSG00000026950.18	Neb	chr2	-	0.919	0.928	0.914	0.997	0.997	0.995	-0.076	0	0	SE	52164591-52164702~52165166-52165277~52167559-52167664
SE.6141	ENSMUSG00000040118.15	Cacna2d1	chr5	+	0.995	0.986	1	0.324	0.447	0.323	0.629	0	0	SE	16320083-16320158~16322538-16322595~16326311-16326383
SE.6153	ENSMUSG00000049225.14	Pdp1	chr4	-	0.003	0.022	0.006	0.397	0.418	0.561	-0.448	0	0	SE	11959806-11962233~11965613-11965648~11966301-11966427
SE.6635	ENSMUSG00000011257.19	Pabpc4	chr4	+	0.578	0.609	0.537	0.901	0.908	0.894	-0.326	0	0	SE	123295201-123295273~123295749-123295836~123295929-123296057
SE.6636	ENSMUSG00000011257.19	Pabpc4	chr4	+	0.153	0.209	0.216	0.547	0.461	0.472	-0.301	0	0	SE	123295201-123295321~123295749-123295836~123295929-123296057
SE.6655	ENSMUSG00000004558.15	Ndrg2	chr14	-	0.981	0.979	0.967	0.827	0.805	0.862	0.144	0	0	SE	51910505-51910785~51911085-51911127~51911465-51911546
SE.7246	ENSMUSG00000029862.16	Clcn1	chr6	+	0.344	0.474	0.127	1	1	1	-0.685	0	0	SE	42292940-42293018~42293443-42293522~42294074-42294156
SE.7247	ENSMUSG00000029862.16	Clcn1	chr6	+	0.15	0.149	0.058	0.645	0.9	0.724	-0.637	0	0	SE	42292940-42293018~42293443-42293522~42294077-42294156
SE.7442	ENSMUSG00000028402.18	Mpdz	chr4	-	0.297	0.335	0.226	0.856	0.961	0.853	-0.604	0	0	SE	81310156-81310319~81313499-81313598~81317593-81317704
SE.7443	ENSMUSG00000028402.18	Mpdz	chr4	-	0.311	0.219	0.353	0.856	0.812	0.814	-0.533	0	0	SE	81310156-81310319~81313499-81313598~81320345-81320523
SE.7447	ENSMUSG00000028402.18	Mpdz	chr4	-	0.861	0.945	0.814	0.193	0.111	0.148	0.723	0	0	SE	81329426-81329531~81332976-81333018~81335675-81335874
SE.7527	ENSMUSG00000028960.20	Ube4b	chr4	-	0.935	0.953	0.851	0.157	0.458	0.164	0.653	0	0	SE	149372827-149372969~149379271-149379409~149380033-149380338
SE.7605	ENSMUSG00000073557.12	Ppp1r12b	chr1	-	0.892	0.925	0.948	0.226	0.175	0.184	0.727	0	0	SE	134759066-134760495~134765896-134766077~134771997-134772048
SE.7952	ENSMUSG00000060913.6	Trim55	chr3	+	0.87	0.98	0.985	0.239	0.227	0.196	0.724	0	0	SE	19672755-19672997~19674253-19674541~19691476-19692421
SE.8068	ENSMUSG00000036087.18	Slain2	chr5	+	0.917	0.942	0.925	0.464	0.449	0.404	0.489	0	0	SE	72958148-72958286~72965803-72965881~72974530-72974702
SE.8684	ENSMUSG00000018411.17	Mapt	chr11	+	0.858	0.967	0.803	0.31	0.277	0.307	0.578	0	0	SE	104306625-104306758~104307880-104307934~104310268-104310534
SE.8942	ENSMUSG00000033392.16	Clasp2	chr9	+	0.019	0.019	0.008	0.264	0.297	0.156	-0.224	0	0	SE	113870622-113870730~113875264-113875327~113876243-113876350
SE.9819	ENSMUSG00000019487.11	Trip10	chr17	+	0.925	0.951	0.936	0.58	0.63	0.713	0.296	0	0	SE	57255272-57255467~57256859-57257027~57257234-57257344
SE.10275	ENSMUSG00000026571.12	Dcaf6	chr1	-	0.862	0.909	0.902	0.198	0.422	0.245	0.603	0	0	SE	165357428-165357546~165374061-165374235~165388657-165388746
SE.10487	ENSMUSG00000051586.17	Mical3	chr6	-	1	0.923	0.809	0.093	0.209	0.279	0.717	0	0	SE	120962754-120962865~120966053-120966116~120969354-120969492
SE.11330	ENSMUSG00000032536.12	Trak1	chr9	+	0.827	0.8	0.792	0.446	0.489	0.445	0.346	0	0	SE	121468984-121469087~121470227-121470320~121472236-121474916
SE.11530	ENSMUSG00000026782.15	Abi2	chr1	+	0.012	0	0	0.482	0.468	0.398	-0.445	0	0	SE	60448077-60448202~60450070-60450253~60453603-60453762
SE.11925	ENSMUSG00000026407.17	Cacna1s	chr1	+	0.998	0.998	1	0.403	0.504	0.451	0.546	0	0	SE	136101478-136101562~136104569-136104626~136105447-136105576
SE.12111	ENSMUSG00000012296.16	Tjap1	chr17	-	0.038	0.128	0.085	0.849	0.829	0.877	-0.768	0	0	SE	46260094-46260202~46260879-46260909~46261135-46261202
SE.12334	ENSMUSG00000039844.20	Rapgef1	chr2	+	0.592	0.569	0.605	0.079	0.097	0.113	0.492	0	0	SE	29719592-29719850~29720642-29720738~29722223-29722309
SE.12375	ENSMUSG00000068823.10	Csde1	chr3	+	0.863	0.847	0.834	0.571	0.665	0.553	0.252	0	0	SE	103028788-103029212~103036574-103036721~103038691-103038890
SE.13117	ENSMUSG00000030695.16	Aldoa	chr7	-	0.011	0.01	0.013	0.037	0.036	0.037	-0.025	0	0	SE	126797643-126797776~126797973-126798126~126800001-126800036
SE.13186	ENSMUSG00000061462.18	Obscn	chr11	-	0.276	0.305	0.229	0.594	0.59	0.512	-0.295	0	0	SE	59010341-59010536~59015435-59015478~59020456-59020568
SE.13192	ENSMUSG00000061462.18	Obscn	chr11	-	0.066	0.078	0.108	0.025	0.032	0.039	0.052	0	0	SE	59043880-59044153~59044813-59045080~59049424-59049500
SE.13263	ENSMUSG00000061462.18	Obscn	chr11	-	0.351	0.243	0.229	0.782	0.666	0.881	-0.502	0	0	SE	59053573-59053837~59062646-59062910~59064186-59064450
SE.13676	ENSMUSG00000057897.14	Camk2b	chr11	-	0.562	0.561	0.649	0.076	0.118	0.116	0.487	0	0	SE	5972812-5972888~5976764-5976893~5979672-5979721
SE.13681	ENSMUSG00000057897.14	Camk2b	chr11	-	0.675	0.637	0.653	0.113	0.07	0.133	0.55	0	0	SE	5972812-5972888~5978398-5978512~5979672-5979721
SE.13685	ENSMUSG00000057897.14	Camk2b	chr11	-	1	0.99	1	0.713	0.607	0.677	0.331	0	0	SE	5982720-5982758~5987056-5987131~5988100-5988143
SE.13791	ENSMUSG00000044308.17	Ubr3	chr2	+	0.003	0.008	0.017	0.093	0.117	0.161	-0.114	0	0	SE	69993711-69993812~69999084-69999218~70000457-70000543
SE.13852	ENSMUSG00000009207.15	Lnpk	chr2	-	0.669	0.629	0.758	0.313	0.273	0.326	0.381	0	0	SE	74520290-74522297~74528091-74528174~74529630-74529801
SE.13899	ENSMUSG00000051747.15	Ttn	chr2	-	0.867	0.857	0.834	0.991	0.996	0.986	-0.138	0	0	SE	76703979-76705329~76705669-76705972~76706439-76706593
SE.13915	ENSMUSG00000051747.15	Ttn	chr2	-	0.989	0.992	0.985	0.94	0.898	0.973	0.052	0	0	SE	76800482-76800580~76802230-76802497~76803292-76803416
SE.13922	ENSMUSG00000051747.15	Ttn	chr2	-	0.562	0.529	0.401	0.89	0.851	0.889	-0.379	0	0	SE	76816988-76817075~76817788-76817863~76821115-76821184
SE.13924	ENSMUSG00000051747.15	Ttn	chr2	-	0.734	0.742	0.646	0.962	0.93	0.923	-0.231	0	0	SE	76816988-76817075~76818735-76818816~76821115-76821184
SE.13936	ENSMUSG00000051747.15	Ttn	chr2	-	1	1	1	0.964	0.949	0.978	0.036	0	0	SE	76818735-76818816~76821115-76821184~76822450-76822564
SE.13960	ENSMUSG00000051747.15	Ttn	chr2	-	1	1	1	0.169	0	0	0.944	0	0	SE	76818735-76818816~76826446-76826542~76831787-76831874
SE.14291	ENSMUSG00000051747.15	Ttn	chr2	-	0.819	0.896	0.798	0.49	0.376	0.358	0.43	0	0	SE	76856264-76856366~76857609-76857690~76857903-76857987
SE.14303	ENSMUSG00000051747.15	Ttn	chr2	-	0.995	0.997	0.992	0.947	0.916	0.96	0.054	0	0	SE	76857903-76857987~76859459-76859546~76859913-76859997
SE.14311	ENSMUSG00000051747.15	Ttn	chr2	-	0.018	0.016	0.019	0.152	0.137	0.138	-0.125	0	0	SE	76857903-76857987~76859913-76859997~76862799-76862859
SE.14312	ENSMUSG00000051747.15	Ttn	chr2	-	0.932	0.943	0.938	0.996	1	0.995	-0.059	0	0	SE	76859459-76859546~76859913-76859997~76861096-76861177
SE.14358	ENSMUSG00000051747.15	Ttn	chr2	-	0.958	0.952	0.919	0.99	0.969	0.999	-0.043	0	0	SE	76881557-76881839~76883909-76884197~76906253-76906532
SE.14362	ENSMUSG00000051747.15	Ttn	chr2	-	0.968	0.963	0.949	0.993	0.978	0.996	-0.029	0	0	SE	76883909-76884197~76884345-76884633~76906253-76906532
SE.14382	ENSMUSG00000051747.15	Ttn	chr2	-	0.94	0.936	0.904	0.987	0.955	0.991	-0.051	0	0	SE	76883909-76884197~76887106-76887385~76906253-76906532
SE.14389	ENSMUSG00000051747.15	Ttn	chr2	-	0.914	0.901	0.828	0.978	0.944	0.998	-0.092	0	0	SE	76881557-76881839~76887805-76888087~76906253-76906532
SE.14396	ENSMUSG00000051747.15	Ttn	chr2	-	0.946	0.941	0.91	0.989	0.965	0.994	-0.05	0	0	SE	76883909-76884197~76887805-76888087~76906253-76906532
SE.14400	ENSMUSG00000051747.15	Ttn	chr2	-	0.879	0.859	0.776	0.968	0.918	0.997	-0.123	0	0	SE	76881557-76881839~76888885-76889173~76906253-76906532
SE.14403	ENSMUSG00000051747.15	Ttn	chr2	-	0.923	0.914	0.879	0.983	0.948	0.991	-0.069	0	0	SE	76883909-76884197~76888885-76889173~76906253-76906532
SE.14408	ENSMUSG00000051747.15	Ttn	chr2	-	0.889	0.881	0.828	0.976	0.929	0.985	-0.097	0	0	SE	76883909-76884197~76889303-76889591~76906253-76906532
SE.14417	ENSMUSG00000051747.15	Ttn	chr2	-	0.876	0.882	0.884	0.934	0.939	0.989	-0.073	0	0	SE	76877902-76878181~76890093-76890372~76903062-76903626
SE.14444	ENSMUSG00000051747.15	Ttn	chr2	-	0.841	0.821	0.684	0.954	0.867	0.995	-0.157	0	0	SE	76881557-76881839~76892898-76893177~76906253-76906532
SE.14447	ENSMUSG00000051747.15	Ttn	chr2	-	0.897	0.889	0.819	0.976	0.914	0.986	-0.09	0	0	SE	76883909-76884197~76892898-76893177~76906253-76906532
SE.14463	ENSMUSG00000051747.15	Ttn	chr2	-	0.921	0.914	0.848	0.982	0.929	0.989	-0.072	0	0	SE	76883909-76884197~76894141-76894423~76906253-76906532
SE.14477	ENSMUSG00000051747.15	Ttn	chr2	-	0.84	0.851	0.817	0.935	0.936	0.987	-0.117	0	0	SE	76877902-76878181~76894623-76894902~76903062-76903626
SE.14480	ENSMUSG00000051747.15	Ttn	chr2	-	0.822	0.798	0.607	0.966	0.887	0.997	-0.208	0	0	SE	76881557-76881839~76894623-76894902~76906253-76906532
SE.14490	ENSMUSG00000051747.15	Ttn	chr2	-	0.77	0.793	0.784	0.917	0.911	0.981	-0.154	0	0	SE	76877902-76878181~76895141-76895429~76903062-76903626
SE.14504	ENSMUSG00000051747.15	Ttn	chr2	-	0.718	0.736	0.694	0.876	0.882	0.981	-0.197	0	0	SE	76877902-76878181~76896319-76896598~76903062-76903626
SE.14522	ENSMUSG00000051747.15	Ttn	chr2	-	0.696	0.731	0.689	0.871	0.859	0.978	-0.197	0	0	SE	76877902-76878181~76898444-76898723~76903062-76903626
SE.14524	ENSMUSG00000051747.15	Ttn	chr2	-	0.912	0.875	0.814	0.979	0.935	0.992	-0.102	0	0	SE	76887805-76888087~76898444-76898723~76903062-76903626
SE.14533	ENSMUSG00000051747.15	Ttn	chr2	-	0.706	0.694	0.676	0.876	0.84	0.978	-0.206	0	0	SE	76877902-76878181~76898837-76899116~76903062-76903626
SE.14555	ENSMUSG00000051747.15	Ttn	chr2	-	0.827	0.838	0.84	0.934	0.941	0.988	-0.119	0	0	SE	76877902-76878181~76899979-76900267~76903062-76903626
SE.14577	ENSMUSG00000051747.15	Ttn	chr2	-	0.727	0.741	0.726	0.884	0.876	0.981	-0.182	0	0	SE	76877902-76878181~76901463-76901742~76903062-76903626
SE.14592	ENSMUSG00000051747.15	Ttn	chr2	-	0.962	0.946	0.917	0.992	0.975	0.997	-0.046	0	0	SE	76887805-76888087~76901840-76902122~76903062-76903626
SE.14602	ENSMUSG00000051747.15	Ttn	chr2	-	0.957	0.951	0.914	0.989	0.97	0.999	-0.045	0	0	SE	76881557-76881839~76903062-76903626~76906253-76906532
SE.14603	ENSMUSG00000051747.15	Ttn	chr2	-	0.973	0.971	0.957	0.994	0.981	0.997	-0.024	0	0	SE	76883909-76884197~76903062-76903626~76906253-76906532
SE.14627	ENSMUSG00000051747.15	Ttn	chr2	-	0.006	0.005	0.006	0.368	0.223	0.362	-0.312	0	0	SE	76921550-76921607~76925604-76925979~76927086-76927275
SE.14634	ENSMUSG00000051747.15	Ttn	chr2	-	0.901	0.897	0.889	0.989	0.99	0.979	-0.09	0	0	SE	76954794-76955088~76964474-76964612~76965090-76965228
SE.14636	ENSMUSG00000051747.15	Ttn	chr2	-	0.14	0.148	0.108	0.49	0.503	0.347	-0.315	0	0	SE	76954794-76955088~76965090-76965228~76967053-76967185
SE.14695	ENSMUSG00000034101.14	Ctnnd1	chr2	-	0.03	0	0.025	0.328	0.247	0.25	-0.257	0	0	SE	84624269-84624558~84626019-84626137~84650405-84650676
SE.14829	ENSMUSG00000001911.16	Nfix	chr8	-	0.392	0.347	0.38	0.857	0.864	0.842	-0.481	0	0	SE	84721642-84721818~84723727-84723850~84726468-84726605
SE.15202	ENSMUSG00000027291.15	Vps39	chr2	-	0.632	0.777	0.84	0.114	0	0	0.712	0	0	SE	120346327-120346392~120346856-120346889~120350163-120350229
SE.15242	ENSMUSG00000033526.16	Ppip5k1	chr2	-	0.013	0.011	0.026	0.381	0.191	0.36	-0.294	0	0	SE	121323193-121323376~121327644-121327770~121331557-121331648
SE.15391	ENSMUSG00000026489.13	Coq8a	chr1	-	0.002	0	0	0.212	0.284	0.295	-0.263	0	0	SE	180179195-180179284~180179499-180179592~180182061-180182247
SE.16147	ENSMUSG00000029392.12	Rilpl1	chr5	-	1	1	0.935	0.289	0.207	0.177	0.754	0	0	SE	124493651-124493844~124495898-124495922~124501839-124501932
SE.16148	ENSMUSG00000029392.12	Rilpl1	chr5	-	1	1	0.856	0.197	0.218	0.46	0.66	0	0	SE	124493663-124493844~124496182-124496270~124501839-124501932
SE.16510	ENSMUSG00000032560.14	Dnajc13	chr9	-	0.01	0	0	0.273	0.299	0.266	-0.276	0	0	SE	104152095-104152423~104153267-104153376~104156813-104156913
SE.17014	ENSMUSG00000055027.17	Smyd1	chr6	-	0.576	0.539	0.568	0.833	0.83	0.865	-0.282	0	0	SE	71225331-71225521~71235342-71235381~71237356-71237487
SE.17320	ENSMUSG00000064302.13	Clasp1	chr1	+	0.672	0.657	0.676	0.102	0.055	0.08	0.589	0	0	SE	118510205-118510376~118512174-118512222~118521826-118521934
SE.18014	ENSMUSG00000069601.14	Ank3	chr10	+	0.022	0.015	0.039	0.316	0.253	0.404	-0.299	0	0	SE	69950951-69951058~69953439-69953472~69955925-69956150
SE.18045	ENSMUSG00000032826.19	Ank2	chr3	-	0.467	0.339	0.458	0.792	0.861	0.87	-0.42	0	0	SE	127010853-127011051~127012672-127012771~127013238-127013337
SE.18288	ENSMUSG00000030592.18	Ryr1	chr7	-	0.244	0.253	0.297	0.111	0.139	0.105	0.146	0	0	SE	29043848-29043929~29044918-29044936~29045603-29045677
SE.18289	ENSMUSG00000030592.18	Ryr1	chr7	-	0.05	0.055	0.048	0.006	0.008	0.01	0.043	0	0	SE	29054888-29055059~29056233-29056248~29056923-29057016
SE.18670	ENSMUSG00000052852.8	Reep1	chr6	+	0.985	1	1	0.35	0.377	0.377	0.627	0	0	SE	71795146-71795324~71799165-71799201~71805342-71805494
SE.18833	ENSMUSG00000049134.15	Nrap	chr19	-	0.541	0.521	0.647	0.195	0.198	0.262	0.351	0	0	SE	56372806-56372914~56374363-56374468~56378054-56378171
SE.19000	ENSMUSG00000038763.12	Alpk3	chr7	+	0.464	0.462	0.573	0.863	0.863	0.909	-0.379	0	0	SE	81057599-81057772~81063948-81063987~81067878-81068000
SE.19037	ENSMUSG00000030249.15	Abcc9	chr6	-	0.662	0.616	0.526	0.921	0.869	0.933	-0.306	0	0	SE	142646271-142646373~142648026-142648065~142652526-142652632
SE.19176	ENSMUSG00000032737.13	Inppl1	chr7	-	0.688	0.69	0.712	0.945	0.957	0.979	-0.264	0	0	SE	101822631-101823403~101823512-101823646~101823892-101824559
SE.19350	ENSMUSG00000038244.14	Mical2	chr7	+	0.872	0.771	0.759	0.179	0.304	0.118	0.6	0	0	SE	112331895-112332039~112345245-112345353~112346721-112346908
SE.19449	ENSMUSG00000030730.12	Atp2a1	chr7	-	0.995	0.993	0.999	0.11	0.057	0.142	0.893	0	0	SE	126445857-126446126~126446544-126446586~126446870-126446988
SE.19488	ENSMUSG00000025085.16	Ablim1	chr19	-	0	0.021	0.021	0.622	0.555	0.645	-0.593	0	0	SE	57049461-57049509~57051129-57051234~57061252-57061382
SE.19780	ENSMUSG00000061723.18	Tnnt3	chr7	+	0.185	0.042	0.074	1	1	0.933	-0.877	0	0	SE	142504022-142504065~142507749-142507788~142508334-142508353
SE.19781	ENSMUSG00000061723.18	Tnnt3	chr7	+	0.224	0.045	0.09	1	1	1	-0.88	0	0	SE	142505287-142505299~142507749-142507788~142508334-142508353
SE.19782	ENSMUSG00000061723.18	Tnnt3	chr7	+	0.185	0.033	0.031	1	1	1	-0.917	0	0	SE	142505515-142505530~142507749-142507788~142508334-142508353
SE.19786	ENSMUSG00000061723.18	Tnnt3	chr7	+	0.653	0.716	0.713	0.945	0.9	0.944	-0.236	0	0	SE	142513664-142513705~142514325-142514366~142515775-142515830
SE.20045	ENSMUSG00000031636.7	Pdlim3	chr8	+	0.031	0.027	0.03	0.359	0.167	0.31	-0.249	0	0	SE	45900474-45900559~45908468-45908656~45909018-45909086
SE.20660	ENSMUSG00000052934.14	Fbxo31	chr8	-	0.778	0.847	0.818	0.08	0.069	0.134	0.72	0	0	SE	121560385-121560462~121564637-121564724~121566274-121566346
SE.20719	ENSMUSG00000021493.15	Pdlim7	chr13	-	0.139	0.204	0.13	0.518	0.693	0.586	-0.441	0	0	SE	55507863-55507880~55508207-55508326~55508779-55508810
SE.21579	ENSMUSG00000032497.19	Lrrfip2	chr9	+	1	1	0.878	0.015	0.197	0.111	0.852	0	0	SE	111179046-111179097~111179176-111179221~111179872-111179920
SE.5622	ENSMUSG00000026950.18	Neb	chr2	-	0.939	0.945	0.871	0.998	0.969	0.996	-0.069	1.11022e-16	1.50607e-14	SE	52149589-52149697~52150536-52150629~52159476-52159569
SE.5706	ENSMUSG00000026950.18	Neb	chr2	-	0.004	0.005	0.007	0.091	0.058	0.267	-0.133	1.11022e-16	1.50607e-14	SE	52151363-52151456~52156354-52156447~52159476-52159569
SE.6142	ENSMUSG00000040118.15	Cacna2d1	chr5	+	0.984	0.916	0.879	0.377	0.42	0.504	0.493	1.11022e-16	1.50607e-14	SE	16320083-16320158~16322538-16322595~16326326-16326383
SE.10224	ENSMUSG00000027523.20	Gnas	chr2	+	0.923	0.916	0.912	0.981	0.971	0.969	-0.057	1.11022e-16	1.50607e-14	SE	174334211-174334284~174336746-174336791~174341652-174341707
SE.13273	ENSMUSG00000061462.18	Obscn	chr11	-	0.376	0.485	0.348	0.134	0.062	0.116	0.299	1.11022e-16	1.50607e-14	SE	59062646-59062910~59063464-59063683~59064186-59064450
SE.14062	ENSMUSG00000051747.15	Ttn	chr2	-	0.003	0.014	0.008	0.042	0.02	0.051	-0.029	1.11022e-16	1.50607e-14	SE	76831787-76831874~76838811-76838895~76847387-76847471
SE.14120	ENSMUSG00000051747.15	Ttn	chr2	-	0.07	0.073	0.031	0.326	0.281	0.325	-0.253	1.11022e-16	1.50607e-14	SE	76831787-76831874~76841767-76841836~76857903-76857987
MXE.1230	ENSMUSG00000039844.20	Rapgef1	chr2	+	0.539	0.633	0.664	0.928	0.94	0.819	-0.284	2.22045e-16	1.57723e-14	MXE	29707197-29707400~29710155-29710308;29720642-29720738~29722223-29722309
SE.10979	ENSMUSG00000061816.15	Myl1	chr1	-	0.04	0.035	0.06	0.02	0.024	0.013	0.026	2.22045e-16	2.99365e-14	SE	66934245-66934273~66934517-66934542~66944791-66945143
SE.6797	ENSMUSG00000024392.17	Bag6	chr17	+	0.338	0.266	0.233	0.604	0.56	0.618	-0.315	3.33067e-16	4.4631e-14	SE	35142306-35142384~35142497-35142605~35142726-35142839
MXE.574	ENSMUSG00000026950.18	Neb	chr2	-	0.432	0.478	0.491	0.123	0.161	0.147	0.323	6.66134e-16	4.58383e-14	MXE	52150966-52151059~52153055-52153148;52153682-52153775~52157290-52157383
MXE.590	ENSMUSG00000026950.18	Neb	chr2	-	0.483	0.451	0.382	0.655	0.729	0.702	-0.257	7.77156e-16	5.18575e-14	MXE	52153682-52153775~52154569-52154662;52156354-52156447~52157290-52157383
SE.11687	ENSMUSG00000030987.5	Stim1	chr7	+	0.256	0.151	0.118	0.642	0.489	0.522	-0.376	4.44089e-16	5.8791e-14	SE	102427081-102427317~102428773-102428866~102430884-102430928
SE.14440	ENSMUSG00000051747.15	Ttn	chr2	-	0.856	0.867	0.86	0.912	0.922	0.983	-0.078	4.44089e-16	5.8791e-14	SE	76877902-76878181~76892898-76893177~76903062-76903626
SE.14409	ENSMUSG00000051747.15	Ttn	chr2	-	0.961	0.939	0.928	0.987	0.972	0.993	-0.041	5.55112e-16	7.21842e-14	SE	76887805-76888087~76889303-76889591~76903062-76903626
SE.17326	ENSMUSG00000064302.13	Clasp1	chr1	+	0.204	0.301	0.227	0.725	0.782	0.678	-0.484	5.55112e-16	7.21842e-14	SE	118539265-118539369~118541674-118541698~118543101-118543346
SE.18604	ENSMUSG00000039126.10	Prune2	chr19	+	1	1	1	0.246	0.301	0.304	0.716	5.55112e-16	7.21842e-14	SE	17208230-17208329~17211677-17211713~17212291-17212330
MXE.430	ENSMUSG00000038485.6	Socs7	chr11	+	0.782	0.856	0.861	0.547	0.492	0.533	0.309	1.33227e-15	8.38187e-14	MXE	97373065-97373130~97376436-97376541;97376996-97377098~97377935-97378066
MXE.1038	ENSMUSG00000027523.20	Gnas	chr2	+	0.809	0.723	0.85	0.913	0.933	0.932	-0.132	1.33227e-15	8.38187e-14	MXE	174334211-174334284~174336746-174336791;174341649-174341707~174343199-174343297
MXE.547	ENSMUSG00000026950.18	Neb	chr2	-	0.057	0.044	0.065	0.136	0.157	0.134	-0.087	1.44329e-15	8.82812e-14	MXE	52149589-52149697~52150536-52150629;52153055-52153148~52157290-52157383
SE.2530	ENSMUSG00000022185.19	Acin1	chr14	-	1	1	1	0.129	0	0.282	0.863	8.88178e-16	1.14815e-13	SE	54651514-54651858~54653213-54653317~54653534-54653681
MXE.1384	ENSMUSG00000033335.17	Dnm2	chr9	+	0.923	0.868	0.896	0.577	0.686	0.543	0.294	1.9984e-15	1.18932e-13	MXE	21478280-21478348~21478898-21479037;21480406-21480545~21481332-21481419
SE.19489	ENSMUSG00000025085.16	Ablim1	chr19	-	0.057	0	0.019	0.238	0.325	0.373	-0.287	9.99201e-16	1.28412e-13	SE	57049461-57049509~57059084-57059204~57061252-57061382
SE.1217	ENSMUSG00000056692.13	Ilrun	chr17	-	0.859	0.855	0.952	0.678	0.696	0.632	0.22	1.33227e-15	1.7022e-13	SE	27751245-27753995~27768135-27768239~27786070-27786268
SE.18027	ENSMUSG00000069601.14	Ank3	chr10	+	1	0.983	1	0.784	0.506	0.671	0.341	1.77636e-15	2.25649e-13	SE	70013971-70014055~70014189-70014246~70015567-70015653
SE.7561	ENSMUSG00000045962.16	Wnk1	chr6	-	0.356	0.397	0.45	0.697	0.829	0.656	-0.326	1.9984e-15	2.52396e-13	SE	119951897-119951995~119953770-119954232~119956070-119956196
SE.141	ENSMUSG00000034055.16	Phka1	chrX	-	0.353	0.347	0.409	0.079	0.13	0.228	0.224	2.44249e-15	3.06721e-13	SE	102555525-102555617~102557095-102557272~102559564-102559734
SE.20696	ENSMUSG00000001017.15	Chtop	chr3	-	0.357	0.255	0.247	0.047	0.089	0.022	0.234	4.32987e-15	5.40643e-13	SE	90503095-90503282~90505394-90505478~90506107-90506261
SE.2529	ENSMUSG00000022185.19	Acin1	chr14	-	1	1	1	0.149	0	0.317	0.845	5.32907e-15	6.61648e-13	SE	54651716-54651858~54653213-54653278~54653534-54653682
SE.13935	ENSMUSG00000051747.15	Ttn	chr2	-	1	0.982	1	0.813	0.523	0.386	0.42	6.99441e-15	8.63534e-13	SE	76816988-76817075~76821115-76821184~76831787-76831874
MXE.601	ENSMUSG00000026950.18	Neb	chr2	-	0.031	0.03	0.05	0.016	0.006	0.024	0.022	1.92069e-14	1.11299e-12	MXE	52183731-52183836~52185270-52185375;52186011-52186116~52187410-52187515
SE.11080	ENSMUSG00000038764.14	Ptpn3	chr4	-	0.922	0.911	0.94	0.992	1	1	-0.073	1.78746e-14	2.19448e-12	SE	57239527-57239700~57240785-57240849~57244974-57245063
SE.14536	ENSMUSG00000051747.15	Ttn	chr2	-	0.682	0.614	0.422	0.934	0.74	0.994	-0.317	1.80966e-14	2.2094e-12	SE	76881557-76881839~76898837-76899116~76906253-76906532
SE.19614	ENSMUSG00000032324.11	Tspan3	chr9	-	0.915	0.964	0.885	1	1	0.993	-0.076	1.9984e-14	2.42635e-12	SE	56135883-56136735~56145488-56145572~56145774-56145927
MXE.566	ENSMUSG00000026950.18	Neb	chr2	-	0.024	0.02	0.024	0.057	0.06	0.058	-0.036	4.32987e-14	2.44471e-12	MXE	52150966-52151059~52151363-52151456;52153055-52153148~52157290-52157383
SE.6476	ENSMUSG00000014426.9	Map3k4	chr17	-	0.31	0.329	0.391	0.842	0.738	0.769	-0.44	2.88658e-14	3.48547e-12	SE	12239969-12240070~12242649-12242805~12243499-12243596
MXE.34	ENSMUSG00000025006.18	Sorbs1	chr19	-	0.294	0.384	0.291	0.806	0.718	0.804	-0.453	6.78346e-14	3.7343e-12	MXE	40352517-40352565~40361041-40361104;40361428-40361503~40363201-40363265
SE.21940	ENSMUSG00000021820.18	Camk2g	chr14	-	0.104	0.093	0.074	0.394	0.321	0.24	-0.228	3.24185e-14	3.89306e-12	SE	20739326-20739402~20741377-20741491~20742704-20742753
SE.18087	ENSMUSG00000070385.12	Ampd1	chr3	+	0.329	0.282	0.229	0.043	0.032	0.05	0.238	4.37428e-14	5.22441e-12	SE	103074013-103074117~103075406-103075418~103079028-103079203
SE.5698	ENSMUSG00000026950.18	Neb	chr2	-	1	0.99	1	0.862	0.903	0.812	0.138	5.85088e-14	6.95021e-12	SE	52150536-52150629~52156354-52156447~52157290-52157383
SE.14450	ENSMUSG00000051747.15	Ttn	chr2	-	0.964	0.944	0.924	0.986	0.965	0.994	-0.038	6.05072e-14	7.14895e-12	SE	76887805-76888087~76892898-76893177~76903062-76903626
MXE.1729	ENSMUSG00000029767.16	Calu	chr6	+	0.432	0.265	0.368	0.671	0.707	0.682	-0.332	1.36446e-13	7.32817e-12	MXE	29356470-29356697~29361293-29361487;29361559-29361753~29366039-29366206
SE.8679	ENSMUSG00000018411.17	Mapt	chr11	+	0.332	0.287	0.187	0	0	0	0.269	7.50511e-14	8.78597e-12	SE	104282367-104282480~104287122-104287209~104294858-104294924
SE.13552	ENSMUSG00000017119.19	Nbr1	chr11	+	0.756	0.771	0.693	0.985	0.987	0.931	-0.228	7.51621e-14	8.78597e-12	SE	101576302-101576409~101577193-101577251~101577931-101578037
SE.6496	ENSMUSG00000009090.17	Ap1b1	chr11	+	0.173	0.248	0.143	0.594	0.644	0.612	-0.429	8.55982e-14	9.95294e-12	SE	5032417-5032619~5033241-5033262~5033686-5033842
SE.16959	ENSMUSG00000030852.18	Tacc2	chr7	+	0.905	0.976	1	0.749	0.762	0.786	0.195	9.68114e-14	1.11975e-11	SE	130577483-130577516~130589969-130590026~130601836-130601937
SE.4284	ENSMUSG00000038485.6	Socs7	chr11	+	0.61	0.679	0.61	0.945	0.918	0.93	-0.298	9.74776e-14	1.12155e-11	SE	97373065-97373130~97376436-97376541~97377935-97378066
SE.14434	ENSMUSG00000051747.15	Ttn	chr2	-	0.975	0.972	0.947	0.997	0.98	0.998	-0.027	1.07248e-13	1.22754e-11	SE	76883909-76884197~76892503-76892785~76903062-76903626
SE.20020	ENSMUSG00000018661.17	Cog1	chr11	+	0.556	0.794	0.642	0.124	0.069	0.173	0.542	1.10689e-13	1.26037e-11	SE	113661139-113661218~113661658-113661693~113662206-113662400
SE.18935	ENSMUSG00000027763.13	Mbnl1	chr3	+	0.079	0.086	0.074	0.186	0.233	0.207	-0.129	1.12466e-13	1.27399e-11	SE	60613262-60613520~60614682-60614736~60615619-60615772
SE.2946	ENSMUSG00000021686.6	Ap3b1	chr13	+	0.605	0.392	0.402	0.065	0.037	0	0.432	1.39222e-13	1.569e-11	SE	94547754-94547893~94565164-94565200~94565604-94565683
SE.4350	ENSMUSG00000020859.16	Spag9	chr11	+	0.575	0.493	0.602	0.304	0.26	0.22	0.295	1.90514e-13	2.13609e-11	SE	94112032-94112146~94113262-94113301~94114172-94114349
MXE.556	ENSMUSG00000026950.18	Neb	chr2	-	0.192	0.191	0.206	0.1	0.073	0.102	0.105	4.49862e-13	2.35856e-11	MXE	52150536-52150629~52150966-52151059;52151363-52151456~52156354-52156447
SE.14287	ENSMUSG00000051747.15	Ttn	chr2	-	0.453	0.604	0.345	0.055	0.074	0.144	0.376	2.35811e-13	2.63055e-11	SE	76856264-76856366~76857396-76857474~76857903-76857987
SE.20736	ENSMUSG00000057193.8	Slc44a2	chr9	+	0.403	0.453	0.387	0.67	0.685	0.666	-0.259	2.44693e-13	2.71585e-11	SE	21352466-21352551~21353000-21353172~21353681-21353978
SE.8441	ENSMUSG00000031865.16	Dctn1	chr6	+	0.02	0.022	0.007	0.174	0.114	0.104	-0.114	2.4869e-13	2.74634e-11	SE	83183298-83183333~83186427-83186445~83187763-83187784
SE.912	ENSMUSG00000024127.15	Prepl	chr17	-	0.86	0.79	0.773	0.372	0.495	0.4	0.385	2.71339e-13	2.98147e-11	SE	85083192-85083315~85088339-85088875~85090105-85090224
SE.5633	ENSMUSG00000026950.18	Neb	chr2	-	1	0.997	1	0.954	0.961	0.931	0.05	3.17635e-13	3.47281e-11	SE	52150536-52150629~52150966-52151059~52157290-52157383
MXE.348	ENSMUSG00000021268.17	Meg3	chr12	+	0.242	0.594	0.559	0.955	0.955	0.964	-0.493	1.05604e-12	5.40793e-11	MXE	109544026-109544742~109546429-109546542;109549290-109549371~109549478-109549552
SE.8880	ENSMUSG00000038975.14	Rabggtb	chr3	-	0.623	0.543	0.825	1	0.979	1	-0.329	5.57221e-13	6.06212e-11	SE	153908789-153908915~153909348-153909459~153909545-153909598
SE.7061	ENSMUSG00000037736.20	Limch1	chr5	+	1	1	1	0.749	0.808	0.667	0.259	6.53366e-13	7.07309e-11	SE	66974409-66974662~66985432-66985675~66986210-66986537
SE.13193	ENSMUSG00000061462.18	Obscn	chr11	-	1	1	0.991	0.889	0.741	0.851	0.17	6.66023e-13	7.17476e-11	SE	59044813-59045080~59046034-59046307~59049424-59049500
SE.18049	ENSMUSG00000032826.19	Ank2	chr3	-	0.092	0.046	0	0.238	0.416	0.187	-0.234	6.95222e-13	7.45278e-11	SE	127048181-127048280~127052225-127052249~127052687-127052873
SE.3127	ENSMUSG00000021375.11	Kif13a	chr13	-	0.855	0.871	0.697	0.259	0.432	0.339	0.464	7.10876e-13	7.5836e-11	SE	46802515-46802729~46808156-46808276~46808890-46809057
SE.18189	ENSMUSG00000038777.19	Sema6c	chr3	+	0.551	0.648	0.547	0.807	0.868	0.825	-0.251	8.94396e-13	9.49528e-11	SE	95171557-95171602~95171790-95171886~95172254-95173653
SE.5860	ENSMUSG00000024924.14	Vldlr	chr19	+	0.949	0.945	0.816	0.624	0.745	0.629	0.237	9.97979e-13	1.0544e-10	SE	27245534-27245681~27246592-27246676~27247009-27247090
SE.20931	ENSMUSG00000052512.17	Nav2	chr7	+	0.931	1	1	0.596	0.729	0.506	0.367	1.03828e-12	1.09173e-10	SE	49547838-49548541~49551596-49552049~49556909-49556996
MXE.546	ENSMUSG00000026950.18	Neb	chr2	-	0.43	0.427	0.453	0.212	0.321	0.215	0.187	2.22e-12	1.11101e-10	MXE	52149589-52149697~52150536-52150629;52153055-52153148~52153682-52153775
A3SS.1935	ENSMUSG00000022995.16	Enah	chr1	-	0.364	0.382	0.335	0.623	0.695	0.668	-0.302	3.70814e-14	1.12987e-10	A3SS	181921657-181921768~181921768-181922500~181923559-181923840
SE.2312	ENSMUSG00000022139.17	Mbnl2	chr14	+	0.171	0.129	0.165	0.324	0.318	0.402	-0.193	1.27354e-12	1.33273e-10	SE	120396450-120396604~120404637-120404732~120428934-120429626
SE.6152	ENSMUSG00000049225.14	Pdp1	chr4	-	0.156	0.327	0.272	0.866	0.937	0.696	-0.581	1.28797e-12	1.34144e-10	SE	11959806-11962233~11965613-11965648~11965883-11965927
SE.14485	ENSMUSG00000051747.15	Ttn	chr2	-	0.458	0.474	0.405	0.737	0.594	0.773	-0.256	1.57563e-12	1.6333e-10	SE	76894141-76894423~76894623-76894902~76903062-76903626
MXE.1695	ENSMUSG00000061904.12	Slc25a3	chr10	-	0.93	0.939	0.922	0.844	0.884	0.854	0.07	3.44058e-12	1.68359e-10	MXE	91119526-91119706~91121921-91122043;91122107-91122331~91123557-91123706
SE.12538	ENSMUSG00000026490.18	Cdc42bpa	chr1	+	0	0	0	0.191	0.242	0.249	-0.227	1.96243e-12	2.02471e-10	SE	179999361-179999453~180024644-180024802~180031504-180031588
SE.14099	ENSMUSG00000051747.15	Ttn	chr2	-	0.58	0.582	0.436	0.831	0.739	0.837	-0.27	1.98741e-12	2.0409e-10	SE	76831787-76831874~76841089-76841389~76857903-76857987
MXE.1696	ENSMUSG00000061904.12	Slc25a3	chr10	-	0.975	0.978	0.971	0.942	0.955	0.946	0.027	4.67693e-12	2.23882e-10	MXE	91119526-91119706~91121921-91122043;91122206-91122331~91123557-91123706
SE.8682	ENSMUSG00000018411.17	Mapt	chr11	+	0.67	0.747	0.884	0.267	0.293	0.256	0.495	2.37066e-12	2.42314e-10	SE	104302360-104302410~104305211-104305409~104306625-104306674
SE.20936	ENSMUSG00000052512.17	Nav2	chr7	+	1	1	1	0.435	0.765	0.245	0.518	2.8878e-12	2.93807e-10	SE	49552839-49552905~49554214-49554259~49556909-49557070
SE.21314	ENSMUSG00000015501.10	Hivep2	chr10	+	0.016	0	0	0.119	0.131	0.052	-0.095	3.33134e-12	3.37371e-10	SE	14066582-14066684~14110664-14110786~14126451-14126496
SE.7558	ENSMUSG00000045962.16	Wnk1	chr6	-	0.554	0.582	0.584	0.75	0.838	0.736	-0.201	3.45024e-12	3.4781e-10	SE	119951897-119951995~119952684-119952969~119956070-119956196
SE.4812	ENSMUSG00000020340.16	Cyfip2	chr11	-	0.423	0.488	0.495	0.228	0.182	0.199	0.266	3.7258e-12	3.73873e-10	SE	46257548-46257702~46258675-46258750~46260799-46260947
SE.13219	ENSMUSG00000061462.18	Obscn	chr11	-	1	0.943	1	0.392	0.611	0.662	0.426	3.79075e-12	3.78661e-10	SE	59054161-59054425~59055960-59056224~59061423-59061687
SE.17078	ENSMUSG00000022517.17	Mgrn1	chr16	+	0.588	0.56	0.597	0.374	0.342	0.31	0.24	4.39715e-12	4.37248e-10	SE	4924422-4924532~4926308-4926374~4927674-4927901
SE.17493	ENSMUSG00000030172.15	Erc1	chr6	-	0.762	0.852	0.893	0.17	0.355	0.259	0.574	4.55103e-12	4.50511e-10	SE	119773733-119773901~119777987-119778071~119779476-119779632
SE.14460	ENSMUSG00000051747.15	Ttn	chr2	-	0.918	0.923	0.918	0.944	0.952	0.988	-0.042	5.18807e-12	5.11269e-10	SE	76877902-76878181~76894141-76894423~76903062-76903626
SE.13250	ENSMUSG00000061462.18	Obscn	chr11	-	0.345	0.294	0.299	0.692	0.583	0.838	-0.392	5.31752e-12	5.21687e-10	SE	59053573-59053837~59062030-59062294~59064186-59064450
SE.11188	ENSMUSG00000026150.14	Mff	chr1	+	0.184	0.289	0.218	0.084	0.109	0.061	0.146	5.88307e-12	5.74606e-10	SE	82727227-82727336~82728066-82728238~82729215-82729436
SE.19433	ENSMUSG00000030766.15	Arhgap17	chr7	-	0.397	0.346	0.251	0.714	0.907	0.904	-0.51	6.37035e-12	6.19446e-10	SE	123292035-123292205~123294471-123294705~123296409-123296566
SE.13439	ENSMUSG00000033335.17	Dnm2	chr9	+	0.917	0.881	0.909	0.431	0.472	0.622	0.394	7.4023e-12	7.16621e-10	SE	21478280-21478348~21478898-21479037~21480406-21480545
MXE.753	ENSMUSG00000029862.16	Clcn1	chr6	+	0.089	0.077	0	0.258	0.6	0.562	-0.418	1.54809e-11	7.25299e-10	MXE	42292940-42293018~42293443-42293522;42294077-42294156~42298798-42298924
SE.18938	ENSMUSG00000027763.13	Mbnl1	chr3	+	0.147	0.095	0.182	0.354	0.316	0.365	-0.204	8.55183e-12	8.24276e-10	SE	60615619-60615773~60621422-60621458~60622145-60622240
SE.390	ENSMUSG00000025006.18	Sorbs1	chr19	-	0.301	0.299	0.226	0.836	1	0.747	-0.586	8.68094e-12	8.33067e-10	SE	40361041-40361104~40361428-40361503~40363201-40363265
MXE.1593	ENSMUSG00000028273.15	Pdlim5	chr3	-	0.027	0.021	0.057	0.155	0.129	0.303	-0.161	1.91522e-11	8.78609e-10	MXE	142306283-142306298~142309527-142309544;142312122-142312214~142314405-142314448
SE.4980	ENSMUSG00000025871.18	4833439L19Rik	chr13	-	0.245	0.161	0.137	0.581	0.387	0.489	-0.305	9.66316e-12	9.23294e-10	SE	54561570-54561871~54564184-54564272~54565181-54565356
SE.4661	ENSMUSG00000000538.18	Tom1l2	chr11	-	0.646	0.798	0.551	0.895	1	0.982	-0.294	9.73899e-12	9.26511e-10	SE	60231100-60231137~60232897-60232957~60241817-60241893
MXE.1687	ENSMUSG00000029478.16	Ncor2	chr5	-	0.569	0.473	0.398	0.104	0.215	0.093	0.343	2.34538e-11	1.05398e-09	MXE	125018810-125018990~125019818-125020046;125022870-125022924~125023500-125023646
MXE.730	ENSMUSG00000028863.13	Meaf6	chr4	+	0	0	0	0.464	0.698	0.912	-0.691	2.46166e-11	1.08412e-09	MXE	125102838-125103031~125107516-125107546;125107651-125107709~125108322-125108356
MXE.576	ENSMUSG00000026950.18	Neb	chr2	-	0.11	0.128	0.14	0.053	0.071	0.061	0.064	2.56677e-11	1.08693e-09	MXE	52151363-52151456~52153055-52153148;52153682-52153775~52154569-52154662
MXE.596	ENSMUSG00000026950.18	Neb	chr2	-	0.732	0.689	0.757	0.895	0.797	0.872	-0.129	2.54786e-11	1.08693e-09	MXE	52154569-52154662~52156354-52156447;52157831-52157924~52159476-52159569
SE.764	ENSMUSG00000024381.16	Bin1	chr18	+	0.023	0.017	0.04	0.06	0.074	0.109	-0.054	1.30015e-11	1.23155e-09	SE	32424819-32424967~32426223-32426352~32431982-32432093
SE.14407	ENSMUSG00000051747.15	Ttn	chr2	-	0.976	0.975	0.952	0.997	0.983	0.997	-0.025	1.41667e-11	1.33617e-09	SE	76883909-76884197~76889303-76889591~76903062-76903626
SE.13229	ENSMUSG00000061462.18	Obscn	chr11	-	1	0.955	1	0.552	0.717	0.805	0.294	1.43506e-11	1.34773e-09	SE	59054161-59054425~59060843-59061107~59061423-59061687
SE.16131	ENSMUSG00000049550.17	Clip1	chr5	-	0.996	1	1	0.929	0.938	0.964	0.055	1.53523e-11	1.43567e-09	SE	123641777-123641881~123642418-123642616~123646082-123646305
SE.15722	ENSMUSG00000029106.14	Add1	chr5	+	0.127	0.097	0.12	0.388	0.301	0.296	-0.214	1.5687e-11	1.46075e-09	SE	34628414-34628513~34629135-34629172~34630469-34632305
SE.7059	ENSMUSG00000037736.20	Limch1	chr5	+	0.771	0.753	0.898	0.335	0.533	0.279	0.425	1.66811e-11	1.54677e-09	SE	66974409-66974662~66975558-66975819~66993142-66993178
SE.18068	ENSMUSG00000030374.15	Strn4	chr7	+	0.33	0.192	0.416	0.017	0	0	0.307	1.71765e-11	1.58601e-09	SE	16824138-16824217~16825789-16825850~16826463-16826661
SE.11620	ENSMUSG00000024163.17	Mapk8ip3	chr17	-	0	0.058	0	0.365	0.404	0.301	-0.337	1.98607e-11	1.82618e-09	SE	24917994-24918139~24920471-24920495~24923815-24923868
SE.16985	ENSMUSG00000030852.18	Tacc2	chr7	+	0.93	0.961	0.964	0.727	0.909	0.724	0.165	2.00217e-11	1.83332e-09	SE	130742129-130742301~130743543-130743684~130751189-130751333
MXE.1353	ENSMUSG00000061462.18	Obscn	chr11	-	0.76	0.823	0.858	0.652	0.672	0.686	0.144	4.44809e-11	1.84805e-09	MXE	59062030-59062294~59062646-59062910;59064186-59064450~59067065-59067329
MXE.1873	ENSMUSG00000054808.15	Actn4	chr7	-	0.953	0.908	0.921	0.773	0.732	0.745	0.177	4.66628e-11	1.9028e-09	MXE	28894500-28894659~28895120-28895186;28895431-28895512~28896088-28896235
SE.18672	ENSMUSG00000066442.17	Mthfs	chr9	+	1	1	1	0.069	0.607	0.486	0.613	2.80269e-11	2.55568e-09	SE	89211410-89211481~89212533-89213256~89215208-89215470
MXE.1592	ENSMUSG00000028273.15	Pdlim5	chr3	-	0.04	0.034	0.072	0.326	0.23	0.607	-0.339	6.85142e-11	2.74306e-09	MXE	142304704-142304722~142309527-142309544;142312122-142312214~142314405-142314448
MXE.54	ENSMUSG00000032845.16	Alpk2	chr18	-	0.511	0.561	0.527	0.325	0.422	0.372	0.16	8.0601e-11	3.16935e-09	MXE	65300013-65300161~65304449-65307813;65349027-65350708~65372720-65372838
MXE.368	ENSMUSG00000079055.10	Slc8a3	chr12	-	0.848	0.819	0.809	0.174	0.539	0.162	0.534	8.43946e-11	3.2603e-09	MXE	81209453-81209471~81214065-81214169;81216720-81216827~81314259-81316104
SE.16973	ENSMUSG00000030852.18	Tacc2	chr7	+	0.969	0.982	0.969	0.933	0.832	0.829	0.109	3.86917e-11	3.51359e-09	SE	130621720-130626841~130663015-130663141~130674601-130674739
SE.16969	ENSMUSG00000030852.18	Tacc2	chr7	+	0.983	0.989	0.971	0.957	0.893	0.877	0.072	4.0952e-11	3.70355e-09	SE	130621720-130626841~130627397-130627499~130674601-130674739
SE.20695	ENSMUSG00000001017.15	Chtop	chr3	-	0.228	0.195	0.264	0.03	0.049	0.034	0.191	4.28553e-11	3.85978e-09	SE	90503095-90503279~90505394-90505478~90506107-90506261
SE.17324	ENSMUSG00000064302.13	Clasp1	chr1	+	0.045	0.1	0.123	0.429	0.552	0.356	-0.356	4.46626e-11	4.00614e-09	SE	118525296-118525455~118536134-118536197~118539265-118539369
SE.14466	ENSMUSG00000051747.15	Ttn	chr2	-	0.981	0.968	0.956	0.992	0.979	0.996	-0.021	4.67311e-11	4.17464e-09	SE	76887805-76888087~76894141-76894423~76903062-76903626
SE.11119	ENSMUSG00000040964.16	Arhgef10l	chr4	-	0.331	0.342	0.577	0.009	0.034	0.022	0.395	4.90595e-11	4.36491e-09	SE	140568338-140568520~140568755-140568770~140570256-140570402
MXE.557	ENSMUSG00000026950.18	Neb	chr2	-	0.066	0.062	0.082	0.171	0.148	0.127	-0.079	1.16346e-10	4.41713e-09	MXE	52150536-52150629~52150966-52151059;52153055-52153148~52157290-52157383
SE.3589	ENSMUSG00000079055.10	Slc8a3	chr12	-	0.877	1	1	0.086	0.641	0.075	0.692	5.45303e-11	4.83209e-09	SE	81204891-81205016~81209453-81209471~81214065-81214169
SE.17198	ENSMUSG00000057230.14	Aak1	chr6	+	0.187	0	0.59	1	1	0.863	-0.695	5.77518e-11	5.097e-09	SE	86982541-86982643~86983811-86983922~86986263-86986374
SE.14145	ENSMUSG00000051747.15	Ttn	chr2	-	0.027	0.019	0.011	0.104	0.143	0.148	-0.113	6.68772e-11	5.87877e-09	SE	76831787-76831874~76844204-76844279~76850569-76850644
A3SS.2311	ENSMUSG00000030852.18	Tacc2	chr7	+	0.918	0.885	0.866	0.967	1	0.962	-0.087	4.00424e-12	6.10046e-09	A3SS	130728522-130729828~130733505-130733517~130733517-130733566
SE.1415	ENSMUSG00000022892.11	App	chr16	-	0.374	0.432	0.415	0.604	0.669	0.639	-0.23	8.9161e-11	7.80638e-09	SE	84965669-84965770~84971407-84971461~84978063-84978285
SE.10973	ENSMUSG00000061816.15	Myl1	chr1	-	0.082	0.086	0.077	0.156	0.134	0.116	-0.054	8.99955e-11	7.84818e-09	SE	66930185-66930329~66934245-66934273~66934517-66934542
SE.5319	ENSMUSG00000035620.15	Ric8b	chr10	+	0.397	0.485	0.467	0.914	0.77	0.954	-0.43	9.36706e-11	8.13639e-09	SE	84969862-84970091~84970728-84970824~84980047-84980192
SE.15720	ENSMUSG00000029106.14	Add1	chr5	+	0.357	0.442	0.401	0.135	0.08	0.028	0.319	1.04397e-10	9.03238e-09	SE	34620044-34620134~34620831-34620918~34625278-34625435
MXE.1520	ENSMUSG00000051747.15	Ttn	chr2	-	0.776	0.776	0.824	0.669	0.737	0.674	0.099	2.51702e-10	9.39405e-09	MXE	76894141-76894423~76894623-76894902;76903062-76903626~76906253-76906532
MXE.1546	ENSMUSG00000051747.15	Ttn	chr2	-	0.872	0.86	0.858	0.911	0.917	0.918	-0.052	2.62112e-10	9.61949e-09	MXE	76967053-76967185~76968395-76968533;76969139-76969292~76969620-76969951
RI.1909	ENSMUSG00000014778.10	Fhod1	chr8	-	0.143	0.139	0.124	0.467	0.517	0.432	-0.337	9.07496e-12	1.31768e-08	RI	105331641-105331824~105331641-105332192~105332036-105332192
SE.13942	ENSMUSG00000051747.15	Ttn	chr2	-	1	0.951	1	0.752	0.443	0.46	0.432	1.58956e-10	1.36989e-08	SE	76816988-76817075~76822450-76822564~76831787-76831874
SE.5710	ENSMUSG00000026950.18	Neb	chr2	-	0.654	0.612	0.505	0.81	0.832	0.844	-0.238	1.60171e-10	1.37497e-08	SE	52153682-52153775~52156354-52156447~52157290-52157383
SE.16201	ENSMUSG00000029446.14	Psph	chr5	-	0.534	0.5	0.741	0.029	0	0.16	0.529	1.70233e-10	1.45566e-08	SE	129771475-129771632~129776829-129776941~129779021-129779248
SE.3114	ENSMUSG00000037960.11	Card19	chr13	-	0.108	0.121	0.177	0.328	0.26	0.379	-0.187	1.86173e-10	1.58579e-08	SE	49203717-49203789~49203928-49203988~49205191-49205345
SE.10277	ENSMUSG00000026571.12	Dcaf6	chr1	-	0.974	0.961	0.989	0.758	0.935	0.748	0.161	2.01783e-10	1.71212e-08	SE	165367445-165367505~165374061-165374235~165388657-165388746
SE.14446	ENSMUSG00000051747.15	Ttn	chr2	-	0.978	0.976	0.95	0.997	0.979	0.997	-0.023	2.20055e-10	1.85997e-08	SE	76883909-76884197~76892898-76893177~76903062-76903626
SE.3126	ENSMUSG00000021375.11	Kif13a	chr13	-	1	0.972	1	0.603	0.905	0.704	0.253	2.44241e-10	2.05649e-08	SE	46778893-46778993~46780625-46780664~46785245-46785392
SE.11057	ENSMUSG00000028708.16	Mknk1	chr4	+	0.685	0.692	0.766	0.351	0.18	0.121	0.497	2.46313e-10	2.06602e-08	SE	115848219-115848362~115854901-115855007~115857031-115857133
SE.4477	ENSMUSG00000000631.20	Myo18a	chr11	+	0.954	0.983	0.984	0.866	0.882	0.831	0.114	2.7798e-10	2.32277e-08	SE	77812008-77812719~77814633-77814711~77815855-77815891
MXE.585	ENSMUSG00000026950.18	Neb	chr2	-	0.807	0.811	0.689	0.918	0.924	0.939	-0.158	6.68282e-10	2.41239e-08	MXE	52151363-52151456~52153682-52153775;52156354-52156447~52157290-52157383
SE.10211	ENSMUSG00000018501.17	Ncor1	chr11	-	0.164	0.162	0.158	0.327	0.39	0.282	-0.172	3.07763e-10	2.5619e-08	SE	62358854-62359015~62359760-62359934~62366963-62367159
MXE.1516	ENSMUSG00000051747.15	Ttn	chr2	-	0.366	0.362	0.372	0.492	0.457	0.54	-0.13	7.42449e-10	2.63689e-08	MXE	76892898-76893177~76894141-76894423;76895923-76896202~76896319-76896598
SE.4644	ENSMUSG00000042529.14	Kcnj12	chr11	+	0.256	0.756	0.065	1	1	1	-0.641	3.18366e-10	2.64016e-08	SE	61065803-61065977~61066665-61066950~61069127-61071127
SE.3771	ENSMUSG00000037989.15	Wnk2	chr13	-	0.96	0.937	0.985	0.813	0.753	0.744	0.191	3.29043e-10	2.71844e-08	SE	49044373-49044418~49050483-49050582~49051356-49051527
SE.388	ENSMUSG00000025006.18	Sorbs1	chr19	-	0.111	0.258	0.251	0.036	0.07	0.052	0.154	3.48498e-10	2.86839e-08	SE	40352517-40352565~40361041-40361104~40363201-40363265
SE.10683	ENSMUSG00000029406.15	Pitpnm2	chr5	-	0.872	0.799	0.723	0.412	0.506	0.487	0.33	3.5723e-10	2.92928e-08	SE	124123938-124124087~124124797-124124959~124125298-124125463
SE.13074	ENSMUSG00000041757.17	Plekha6	chr1	+	1	1	0.394	0	0	0	0.798	4.31468e-10	3.52489e-08	SE	133275811-133275865~133279372-133279453~133281782-133281863
SE.16468	ENSMUSG00000029650.10	Slc46a3	chr5	-	0.55	0.647	0.429	1	1	1	-0.458	4.56999e-10	3.71963e-08	SE	147893880-147894045~147894480-147894596~147894708-147894815
A3SS.2362	ENSMUSG00000045095.16	Magi1	chr6	-	0	0	0	0.64	0.446	0.563	-0.55	3.67063e-11	3.72814e-08	A3SS	93694007-93694175~93694175-93694211~93697193-93697487
SE.5659	ENSMUSG00000026950.18	Neb	chr2	-	1	0.955	1	0.81	0.809	0.664	0.224	4.77252e-10	3.87014e-08	SE	52150536-52150629~52153055-52153148~52157290-52157383
MXE.1536	ENSMUSG00000051747.15	Ttn	chr2	-	0.756	0.756	0.792	0.647	0.707	0.621	0.11	1.129e-09	3.94613e-08	MXE	76899590-76899869~76899979-76900267;76903062-76903626~76906253-76906532
SE.16225	ENSMUSG00000061904.12	Slc25a3	chr10	-	0.014	0.012	0.018	0.033	0.026	0.033	-0.016	5.20518e-10	4.20548e-08	SE	91119526-91119706~91121921-91122043~91122206-91122331
SE.8314	ENSMUSG00000029020.13	Mfn2	chr4	-	0.973	0.979	0.964	0.921	0.932	0.904	0.053	5.47707e-10	4.40894e-08	SE	147898463-147898642~147902927-147903010~147903354-147903497
A5SS.1162	ENSMUSG00000034101.14	Ctnnd1	chr2	-	0.719	1	1	0.235	0.338	0.367	0.593	1.26702e-10	4.57901e-08	A5SS	84626019-84626137~84650320-84650405~84650405-84650745
SE.16611	ENSMUSG00000029767.16	Calu	chr6	+	0.424	0.655	0.462	0.207	0.173	0.182	0.326	5.9382e-10	4.7627e-08	SE	29361293-29361487~29361559-29361753~29366039-29366206
MXE.1039	ENSMUSG00000027523.20	Gnas	chr2	+	0.949	0.918	0.928	0.984	0.975	0.973	-0.046	1.44758e-09	4.95492e-08	MXE	174334211-174334284~174336746-174336791;174341652-174341707~174343199-174343297
MXE.1544	ENSMUSG00000051747.15	Ttn	chr2	-	0.764	0.751	0.792	0.65	0.707	0.615	0.112	1.46262e-09	4.95492e-08	MXE	76901463-76901742~76901840-76902122;76903062-76903626~76906253-76906532
MXE.1937	ENSMUSG00000049134.15	Nrap	chr19	-	0.677	0.685	0.655	0.793	0.796	0.813	-0.128	1.54933e-09	5.16914e-08	MXE	56366374-56366473~56371822-56371927;56372806-56372914~56378054-56378171
SE.375	ENSMUSG00000025006.18	Sorbs1	chr19	-	0.987	0.985	0.925	0.728	0.896	0.743	0.177	6.63745e-10	5.30416e-08	SE	40318021-40318068~40321792-40321960~40324746-40324832
SE.18936	ENSMUSG00000027763.13	Mbnl1	chr3	+	0.068	0.074	0.122	0.495	0.329	0.391	-0.317	6.73189e-10	5.36015e-08	SE	60613262-60613520~60614682-60614736~60615724-60615773
MXE.1874	ENSMUSG00000054808.15	Actn4	chr7	-	0.911	0.94	0.985	0.802	0.723	0.739	0.191	1.65934e-09	5.45355e-08	MXE	28906971-28907064~28909902-28909988;28911489-28911575~28912239-28912321
SE.11215	ENSMUSG00000028906.17	Epb41	chr4	-	0.242	0.427	0.148	0.026	0	0	0.264	7.4409e-10	5.90329e-08	SE	131935738-131935867~131955527-131955578~131957642-131957819
SE.14565	ENSMUSG00000051747.15	Ttn	chr2	-	0.332	0.349	0.309	0.619	0.474	0.701	-0.268	9.38953e-10	7.42246e-08	SE	76894141-76894423~76900381-76900660~76903062-76903626
SE.14056	ENSMUSG00000051747.15	Ttn	chr2	-	0.009	0.102	0.052	0.296	0.176	0.365	-0.225	1.19489e-09	9.41179e-08	SE	76826994-76827078~76838811-76838895~76847387-76847471
SE.5634	ENSMUSG00000026950.18	Neb	chr2	-	0.983	0.982	0.971	0.922	0.951	0.904	0.053	1.26023e-09	9.89103e-08	SE	52150536-52150629~52150966-52151059~52157831-52157912
SE.12024	ENSMUSG00000025968.16	Ndufs1	chr1	-	0.023	0.03	0.02	0.11	0.104	0.094	-0.078	1.36773e-09	1.06965e-07	SE	63170848-63170914~63172153-63172257~63176585-63176669
SE.18480	ENSMUSG00000019854.17	Reps1	chr10	+	0.145	0.194	0.245	0.541	0.592	0.558	-0.369	1.41262e-09	1.10084e-07	SE	18104153-18104275~18107667-18107748~18114398-18114486
SE.16730	ENSMUSG00000019787.9	Trdn	chr10	+	0.998	1	0.997	0.97	0.987	0.962	0.025	1.57052e-09	1.21956e-07	SE	33195948-33196125~33200162-33200222~33233854-33233926
SE.5819	ENSMUSG00000032336.17	Nptn	chr9	+	0.036	0.052	0.042	0.096	0.071	0.11	-0.049	1.62569e-09	1.25796e-07	SE	58582239-58582526~58618662-58619010~58623686-58623855
MXE.169	ENSMUSG00000022677.15	Fopnl	chr16	-	0.375	0.388	0.342	0.207	0.174	0.14	0.195	3.98051e-09	1.28898e-07	MXE	14299243-14300209~14304453-14304587;14311046-14311131~14313815-14314013
SE.17795	ENSMUSG00000068250.13	Amn1	chr6	-	1	1	1	0.651	0.455	0.569	0.442	1.72853e-09	1.33285e-07	SE	149170832-149171050~149183393-149183538~149188605-149188695
SE.11176	ENSMUSG00000056211.13	R3hdm1	chr1	+	0.568	0.887	0.802	0.12	0.351	0.204	0.527	1.83561e-09	1.41047e-07	SE	128153188-128153399~128162768-128162858~128167892-128168007
SE.21888	ENSMUSG00000037151.8	Lrrc20	chr10	+	0.955	0.964	0.92	0.838	0.61	0.825	0.189	2.19507e-09	1.6808e-07	SE	61475800-61475889~61482335-61482482~61527059-61527209
SE.11121	ENSMUSG00000040964.16	Arhgef10l	chr4	-	0.111	0	0	0.394	0.489	0.352	-0.375	2.20583e-09	1.68317e-07	SE	140583823-140583932~140586783-140586900~140591817-140591987
SE.5638	ENSMUSG00000026950.18	Neb	chr2	-	0.99	0.994	0.99	0.859	0.955	0.864	0.099	2.24505e-09	1.70717e-07	SE	52149589-52149697~52151363-52151456~52157831-52157912
SE.18610	ENSMUSG00000039126.10	Prune2	chr19	+	0.694	1	1	0.223	0.067	0.284	0.707	2.52419e-09	1.91282e-07	SE	17212291-17212330~17216325-17216373~17220783-17221809
SE.7353	ENSMUSG00000028207.18	Asph	chr4	-	1	1	1	0.619	0.549	0.25	0.527	2.5567e-09	1.93079e-07	SE	9604515-9604629~9610842-9610938~9635900-9635969
SE.15734	ENSMUSG00000022565.15	Plec	chr15	-	0.68	0.69	0.608	0.32	0.437	0.226	0.332	2.58581e-09	1.93944e-07	SE	76194340-76194430~76194558-76194573~76194750-76194812
SE.19812	ENSMUSG00000005534.10	Insr	chr8	-	0.219	0.125	0.15	0.389	0.451	0.36	-0.235	2.58499e-09	1.93944e-07	SE	3174794-3174888~3181701-3181737~3184950-3185152
MXE.1522	ENSMUSG00000051747.15	Ttn	chr2	-	0.859	0.86	0.903	0.797	0.851	0.783	0.064	6.80177e-09	2.17065e-07	MXE	76894141-76894423~76894659-76894902;76903062-76903626~76906253-76906532
MXE.1043	ENSMUSG00000026571.12	Dcaf6	chr1	-	0.704	0.646	0.779	0.46	0.384	0.235	0.35	7.04599e-09	2.21647e-07	MXE	165351960-165352076~165357428-165357546;165367445-165367505~165374061-165374235
SE.14544	ENSMUSG00000051747.15	Ttn	chr2	-	0.114	0.131	0.099	0.301	0.157	0.364	-0.159	2.98364e-09	2.23022e-07	SE	76894141-76894423~76899207-76899489~76903062-76903626
SE.14937	ENSMUSG00000038437.11	Mllt6	chr11	+	0.378	0.503	0.578	0.829	0.74	0.789	-0.3	3.00744e-09	2.24039e-07	SE	97677147-97677236~97678313-97678663~97678964-97679055
A5SS.1323	ENSMUSG00000029650.10	Slc46a3	chr5	-	0.757	0.766	0.613	1	1	1	-0.288	7.94169e-10	2.39177e-07	A5SS	147893832-147894045~147894480-147894708~147894708-147894815
SE.15059	ENSMUSG00000028273.15	Pdlim5	chr3	-	1	1	1	0.655	0.767	0.542	0.345	3.23644e-09	2.40284e-07	SE	142304704-142304722~142306283-142306298~142312122-142312214
SE.5660	ENSMUSG00000026950.18	Neb	chr2	-	0.961	0.949	0.937	0.808	0.894	0.738	0.136	3.46991e-09	2.5675e-07	SE	52150536-52150629~52153055-52153148~52157831-52157912
SE.16515	ENSMUSG00000014959.12	Gorasp2	chr2	+	0.116	0.047	0.145	0.036	0.013	0.022	0.079	3.57576e-09	2.63694e-07	SE	70661575-70661760~70672564-70672761~70676464-70676545
SE.18606	ENSMUSG00000039126.10	Prune2	chr19	+	0	0	0	0.954	0.929	0.841	-0.908	3.59974e-09	2.64575e-07	SE	17208230-17208329~17212291-17212330~17220783-17221809
SE.4402	ENSMUSG00000034297.14	Med13	chr11	-	0.983	0.992	0.976	0.876	0.893	0.895	0.096	3.62411e-09	2.64596e-07	SE	86330987-86331185~86331882-86332028~86345859-86346028
SE.14233	ENSMUSG00000051747.15	Ttn	chr2	-	0.685	0.632	0.528	0.832	0.815	0.804	-0.202	3.61953e-09	2.64596e-07	SE	76831787-76831874~76851554-76851764~76857903-76857987
MXE.1528	ENSMUSG00000051747.15	Ttn	chr2	-	0.781	0.774	0.816	0.656	0.738	0.629	0.116	8.7113e-09	2.70173e-07	MXE	76896319-76896598~76896698-76896980;76903062-76903626~76906253-76906532
SE.2547	ENSMUSG00000022884.16	Eif4a2	chr16	+	0.025	0.024	0.012	0.04	0.038	0.123	-0.047	3.76824e-09	2.74208e-07	SE	23111816-23111896~23112350-23112457~23113166-23113184
SE.11217	ENSMUSG00000028906.17	Epb41	chr4	-	0.187	0.425	0.259	0.028	0	0.034	0.27	3.8035e-09	2.7586e-07	SE	131935738-131935867~131955542-131955578~131957642-131957819
SE.13543	ENSMUSG00000037652.15	Phc3	chr3	-	0.847	0.915	0.712	1	1	0.98	-0.169	3.96971e-09	2.86968e-07	SE	30950875-30951031~30958008-30958086~30961727-30961883
SE.7965	ENSMUSG00000038170.15	Pde4dip	chr3	-	0.895	0.904	0.897	0.835	0.842	0.813	0.069	4.16163e-09	2.99855e-07	SE	97706871-97707057~97709481-97709634~97710220-97710444
MXE.1540	ENSMUSG00000051747.15	Ttn	chr2	-	0.795	0.792	0.822	0.688	0.76	0.677	0.095	1.07677e-08	3.29312e-07	MXE	76900381-76900660~76900756-76901035;76903062-76903626~76906253-76906532
SE.5656	ENSMUSG00000026950.18	Neb	chr2	-	0.423	0.49	0.275	0.976	0.705	0.872	-0.455	4.86099e-09	3.49102e-07	SE	52149589-52149697~52153055-52153148~52159476-52159569
SE.21145	ENSMUSG00000032340.8	Neo1	chr9	-	0.679	0.604	0.666	0.841	0.947	0.975	-0.271	6.12362e-09	4.38348e-07	SE	58880591-58880855~58884469-58884628~58888400-58888493
SE.10232	ENSMUSG00000073771.11	Btbd19	chr4	-	0	0.352	0	0.685	1	1	-0.778	6.401e-09	4.56715e-07	SE	117120174-117120861~117120970-117121096~117121197-117121329
SE.13938	ENSMUSG00000051747.15	Ttn	chr2	-	1	1	1	0.962	0.851	0.877	0.103	6.97766e-09	4.9625e-07	SE	76818735-76818816~76821115-76821184~76831787-76831874
SE.2073	ENSMUSG00000033287.16	Kctd17	chr15	+	1	1	0.387	0.24	0	0	0.716	7.19042e-09	5.09731e-07	SE	78435584-78435710~78437583-78437671~78438486-78438497
SE.14594	ENSMUSG00000051747.15	Ttn	chr2	-	0.381	0.417	0.356	0.684	0.519	0.767	-0.272	7.22472e-09	5.10516e-07	SE	76894141-76894423~76901840-76902122~76903062-76903626
SE.6060	ENSMUSG00000017210.14	Med24	chr11	-	0.229	0.172	0.251	0.036	0	0.017	0.2	7.2543e-09	5.10963e-07	SE	98716413-98716525~98717708-98717765~98717909-98718142
SE.5711	ENSMUSG00000026950.18	Neb	chr2	-	0.139	0.119	0.223	0.392	0.513	0.417	-0.28	7.90297e-09	5.53107e-07	SE	52153682-52153775~52156354-52156447~52157831-52157924
SE.14173	ENSMUSG00000051747.15	Ttn	chr2	-	0.562	0.461	0.176	1	1	1	-0.6	7.87832e-09	5.53107e-07	SE	76832100-76832184~76847387-76847471~76857903-76857987
SE.20935	ENSMUSG00000052512.17	Nav2	chr7	+	0.606	1	1	0.133	0.31	0.065	0.699	7.98373e-09	5.56986e-07	SE	49547838-49548541~49554214-49554259~49556909-49557070
SE.595	ENSMUSG00000058881.13	Zfp516	chr18	+	0.724	0.775	0.66	1	1	0.927	-0.256	8.03274e-09	5.58632e-07	SE	82986743-82988198~82993069-82993189~82994469-82994537
MXE.1535	ENSMUSG00000051747.15	Ttn	chr2	-	0.802	0.808	0.825	0.705	0.773	0.709	0.083	1.97906e-08	5.96971e-07	MXE	76899207-76899489~76899590-76899869;76903062-76903626~76906253-76906532
MXE.1538	ENSMUSG00000051747.15	Ttn	chr2	-	0.758	0.758	0.795	0.652	0.719	0.629	0.104	2.03108e-08	6.04383e-07	MXE	76899979-76900267~76900381-76900660;76903062-76903626~76906253-76906532
SE.4977	ENSMUSG00000025871.18	4833439L19Rik	chr13	-	0.911	0.822	0.739	0.306	0.387	0.335	0.481	9.10315e-09	6.31075e-07	SE	54559197-54559324~54564184-54564272~54565181-54565356
SE.5174	ENSMUSG00000020169.4	Best3	chr10	+	0.818	0.943	1	0.685	0.252	0.321	0.501	9.1602e-09	6.33033e-07	SE	116986313-116986812~116988614-116988782~116993063-116993297
SE.6511	ENSMUSG00000037692.14	Ahdc1	chr4	+	0.143	0.2	0.138	0.033	0.008	0	0.147	9.79503e-09	6.74782e-07	SE	133055012-133055203~133055294-133055505~133060675-133060892
SE.6632	ENSMUSG00000028649.21	Macf1	chr4	-	0.436	0.564	0.399	0.779	0.866	0.747	-0.331	1.01231e-08	6.95202e-07	SE	123539795-123539873~123542491-123542587~123544741-123544831
SE.13050	ENSMUSG00000051343.11	Rab11fip5	chr6	-	0.404	0.375	0.301	0.624	0.612	0.637	-0.264	1.07843e-08	7.38302e-07	SE	85337480-85337670~85340342-85342361~85347779-85348455
SE.7065	ENSMUSG00000037736.20	Limch1	chr5	+	0.582	0.608	0.796	0.17	0.372	0.239	0.402	1.11735e-08	7.62574e-07	SE	66974409-66974662~66987930-66988042~66993142-66993178
SE.9723	ENSMUSG00000035629.19	Rubcn	chr16	-	0.022	0.023	0	0.144	0.194	0.252	-0.182	1.13533e-08	7.72448e-07	SE	32838237-32838353~32841536-32841581~32842997-32843531
SE.7825	ENSMUSG00000063235.16	Ptpmt1	chr2	-	1	1	1	0.448	0.265	0.591	0.565	1.1853e-08	8.03952e-07	SE	90908715-90911319~90916853-90916911~90917428-90917509
A3SS.1429	ENSMUSG00000023150.14	Ivns1abp	chr1	+	0.154	0.128	0.144	0.116	0.068	0.043	0.066	1.06289e-09	8.09655e-07	A3SS	151354633-151354759~151355166-151356128~151356128-151356236
SE.15576	ENSMUSG00000042359.18	Osbpl6	chr2	+	0.368	0.585	0.538	0.87	0.903	1	-0.427	1.20535e-08	8.15042e-07	SE	76568108-76568242~76577011-76577119~76579172-76579310
SE.7562	ENSMUSG00000045962.16	Wnk1	chr6	-	0.365	0.381	0.484	0.56	0.67	0.604	-0.201	1.22573e-08	8.26278e-07	SE	119952684-119952969~119953770-119954232~119956070-119956196
SE.21721	ENSMUSG00000029804.17	Herc3	chr6	+	1	1	1	0.724	0.756	0.574	0.315	1.23411e-08	8.29381e-07	SE	58862828-58863049~58870153-58870213~58873733-58873745
SE.14170	ENSMUSG00000051747.15	Ttn	chr2	-	0.76	0.712	0.618	0.867	0.874	0.824	-0.158	1.25836e-08	8.43098e-07	SE	76831787-76831874~76847387-76847471~76857903-76857987
SE.14506	ENSMUSG00000051747.15	Ttn	chr2	-	0.218	0.227	0.182	0.465	0.329	0.592	-0.253	1.30963e-08	8.74788e-07	SE	76894141-76894423~76896319-76896598~76903062-76903626
SE.15393	ENSMUSG00000026489.13	Coq8a	chr1	-	0	0	0.001	0.025	0.023	0.065	-0.037	1.42499e-08	9.4896e-07	SE	180179141-180179284~180180898-180180997~180182061-180182247
SE.8966	ENSMUSG00000027346.15	Gpcpd1	chr2	-	0.99	0.965	0.992	0.792	0.851	0.96	0.115	1.49718e-08	9.91023e-07	SE	132556934-132556976~132558606-132558682~132564626-132564711
SE.21051	ENSMUSG00000039542.16	Ncam1	chr9	-	0	0	0	0.689	0.632	0.238	-0.52	1.4971e-08	9.91023e-07	SE	49523625-49523646~49535208-49535250~49543010-49543030
RI.48	ENSMUSG00000071653.9	1810009A15Rik	chr19	+	1	1	1	0.494	0	0.661	0.615	1.0357e-09	1.00255e-06	RI	8889123-8889248~8889123-8889727~8889636-8889727
SE.10980	ENSMUSG00000026113.17	Inpp4a	chr1	+	0.2	0.424	0.206	0.694	0.657	0.75	-0.424	1.5852e-08	1.04614e-06	SE	37372310-37372419~37374271-37374289~37377577-37377761
SE.15589	ENSMUSG00000026860.16	Sh3glb2	chr2	-	0.927	0.921	1	0.656	0.711	0.612	0.29	1.59223e-08	1.04763e-06	SE	30347080-30347104~30348554-30348617~30350287-30350380
MXE.942	ENSMUSG00000037568.12	Vash2	chr1	-	0	0	0	0.696	0.825	0.538	-0.686	3.82573e-08	1.12323e-06	MXE	190960097-190960479~190966202-190966277;190970403-190970492~190978180-190978587
SE.13947	ENSMUSG00000051747.15	Ttn	chr2	-	1	1	1	0.901	0.665	0.662	0.257	1.75049e-08	1.14832e-06	SE	76818735-76818816~76822450-76822564~76831787-76831874
MXE.598	ENSMUSG00000026950.18	Neb	chr2	-	0.502	0.513	0.576	0.424	0.429	0.377	0.12	4.26499e-08	1.23572e-06	MXE	52160655-52160748~52161370-52161475;52162067-52162172~52162904-52163009
SE.659	ENSMUSG00000042439.13	Zfp532	chr18	+	1	1	1	0.859	0.361	0.448	0.444	1.90444e-08	1.2456e-06	SE	65644192-65644369~65656350-65656632~65682894-65683007
A5SS.1714	ENSMUSG00000032041.15	Tirap	chr9	-	0.61	1	1	0.211	0	0.05	0.783	4.92008e-09	1.27008e-06	A5SS	35191573-35191696~35199210-35199220~35199220-35199319
SE.21157	ENSMUSG00000051705.13	Senp8	chr9	-	0.776	0.409	0.366	0	0	0	0.517	2.00388e-08	1.30674e-06	SE	59734258-59737868~59750261-59750371~59750577-59750627
SE.17667	ENSMUSG00000028964.14	Park7	chr4	-	1	1	1	0.745	0.87	0.889	0.165	2.01786e-08	1.31197e-06	SE	150901007-150901094~150905249-150905309~150907039-150907141
SE.3469	ENSMUSG00000021182.16	Ccdc88c	chr12	-	0.669	0.906	0.921	0.313	0.522	0.356	0.435	2.13279e-08	1.3826e-06	SE	100923179-100923368~100925211-100925650~100928826-100929065
SE.2309	ENSMUSG00000022139.17	Mbnl2	chr14	+	0.093	0.097	0.051	0.275	0.245	0.16	-0.146	2.24615e-08	1.45181e-06	SE	120388899-120389163~120395711-120395765~120396450-120396604
SE.4755	ENSMUSG00000020386.5	Sar1b	chr11	+	0.825	0.779	0.849	0.912	0.946	0.896	-0.1	2.31668e-08	1.493e-06	SE	51763686-51763791~51777486-51777561~51779688-51779808
SE.1612	ENSMUSG00000038084.16	Opa1	chr16	+	0.35	0.479	0.318	0.147	0.146	0.174	0.227	2.359e-08	1.51583e-06	SE	29588251-29588359~29588822-29588876~29589680-29589748
A3SS.2345	ENSMUSG00000101655.1	2310040G24Rik	chr6	-	0.479	0.515	0.539	0.744	0.815	0.835	-0.287	2.51044e-09	1.52986e-06	A3SS	86483375-86483699~86483699-86483717~86487794-86488227
SE.14117	ENSMUSG00000051747.15	Ttn	chr2	-	0.009	0.011	0.006	0.032	0.023	0.025	-0.018	2.56385e-08	1.64266e-06	SE	76831787-76831874~76841767-76841836~76847387-76847471
MXE.583	ENSMUSG00000026950.18	Neb	chr2	-	0.793	0.827	0.678	0.907	0.918	0.926	-0.151	5.84334e-08	1.67104e-06	MXE	52150536-52150629~52153682-52153775;52156354-52156447~52157290-52157383
MXE.1337	ENSMUSG00000061462.18	Obscn	chr11	-	0.802	0.837	0.842	0.932	0.906	0.94	-0.099	5.95979e-08	1.68249e-06	MXE	59053573-59053837~59054161-59054425;59062030-59062294~59062646-59062910
SE.10270	ENSMUSG00000026571.12	Dcaf6	chr1	-	0.27	0.401	0.355	0.096	0.058	0.102	0.257	2.66766e-08	1.7042e-06	SE	165357428-165357546~165367445-165367505~165388657-165388761
MXE.1517	ENSMUSG00000051747.15	Ttn	chr2	-	0.193	0.203	0.191	0.288	0.241	0.334	-0.092	6.27147e-08	1.72622e-06	MXE	76892898-76893177~76894141-76894423;76898444-76898723~76898837-76899116
MXE.1541	ENSMUSG00000051747.15	Ttn	chr2	-	0.683	0.676	0.716	0.556	0.632	0.563	0.108	6.21456e-08	1.72622e-06	MXE	76900381-76900660~76900756-76901035;76906253-76906532~76921550-76921607
SE.7438	ENSMUSG00000003810.13	Mast2	chr4	-	0.27	0.281	0.182	0.145	0.099	0.132	0.119	2.88741e-08	1.83924e-06	SE	116352972-116353064~116368735-116368930~116391602-116391634
SE.68	ENSMUSG00000025261.18	Huwe1	chrX	+	0.036	0.067	0.045	0.121	0.145	0.146	-0.088	2.93923e-08	1.86684e-06	SE	151835223-151835292~151836221-151836329~151840055-151840108
SE.5694	ENSMUSG00000026950.18	Neb	chr2	-	0.509	0.569	0.517	0.722	0.8	0.729	-0.219	3.11645e-08	1.97369e-06	SE	52153682-52153775~52154569-52154662~52157831-52157924
MXE.1534	ENSMUSG00000051747.15	Ttn	chr2	-	0.847	0.839	0.87	0.749	0.83	0.761	0.072	7.65811e-08	2.08187e-06	MXE	76898837-76899116~76899207-76899489;76903062-76903626~76906253-76906532
SE.379	ENSMUSG00000025006.18	Sorbs1	chr19	-	0.826	0.793	0.676	0.959	1	0.967	-0.21	3.3354e-08	2.10629e-06	SE	40336985-40337035~40340044-40340146~40344355-40344439
MXE.104	ENSMUSG00000039153.17	Runx2	chr17	-	0	0	0.658	0.794	1	1	-0.712	7.90007e-08	2.12146e-06	MXE	44610027-44610093~44639664-44639826;44658518-44658692~44717191-44717296
SE.8685	ENSMUSG00000018411.17	Mapt	chr11	+	1	1	1	0.764	0.941	0.842	0.151	3.52637e-08	2.2205e-06	SE	104310268-104310534~104318156-104318249~104321350-104321432
SE.16163	ENSMUSG00000029478.16	Ncor2	chr5	-	0.535	0.63	0.735	0.928	0.837	0.929	-0.265	3.62882e-08	2.27849e-06	SE	125018810-125018990~125019818-125020046~125022870-125022924
SE.2704	ENSMUSG00000063142.15	Kcnma1	chr14	-	0.792	0.909	0.532	0.233	0.353	0.178	0.49	3.64998e-08	2.28524e-06	SE	23330839-23330970~23336039-23336120~23336944-23337058
SE.10130	ENSMUSG00000028538.12	St3gal3	chr4	-	0.95	0.972	0.9	0.752	0.796	0.573	0.234	4.09926e-08	2.55924e-06	SE	118031839-118031882~118054649-118054697~118107548-118107693
MXE.1479	ENSMUSG00000051747.15	Ttn	chr2	-	0.293	0.266	0.244	0.101	0.167	0.193	0.114	1.00133e-07	2.65654e-06	MXE	76854386-76854467~76856264-76856366;76857396-76857474~76857609-76857690
MXE.1342	ENSMUSG00000061462.18	Obscn	chr11	-	0.968	0.95	0.955	0.909	0.944	0.904	0.039	1.02403e-07	2.68443e-06	MXE	59055376-59055640~59055960-59056224;59067065-59067329~59067582-59067846
SE.17094	ENSMUSG00000044477.12	Zfand3	chr17	+	0.955	0.994	0.98	0.933	0.906	0.839	0.084	4.4064e-08	2.74321e-06	SE	30135322-30135505~30153302-30153368~30192562-30192730
SE.910	ENSMUSG00000024127.15	Prepl	chr17	-	0.62	0.871	0.864	0.978	0.975	1	-0.199	4.47463e-08	2.77781e-06	SE	85066147-85066297~85068884-85069101~85070427-85070603
SE.16583	ENSMUSG00000027692.16	Tnik	chr3	+	0.065	0.132	0	0.359	0.376	0.393	-0.31	4.55079e-08	2.81713e-06	SE	28623010-28623108~28625198-28625222~28630430-28630615
SE.2978	ENSMUSG00000005583.16	Mef2c	chr13	+	0.773	0.767	0.755	0.886	0.881	0.882	-0.118	4.58658e-08	2.83131e-06	SE	83592777-83592981~83625264-83625408~83633054-83633135
A3SS.992	ENSMUSG00000039137.18	Whrn	chr4	-	1	1	1	0	0	0.572	0.809	5.59023e-09	2.83891e-06	A3SS	63429085-63429118~63429118-63429417~63431849-63432059
SE.12767	ENSMUSG00000027605.18	Acss2	chr2	+	0.951	0.946	0.921	0.54	0.791	0.719	0.256	4.63797e-08	2.85501e-06	SE	155550354-155550469~155551189-155551228~155555853-155555991
SE.21768	ENSMUSG00000025786.17	Zdhhc3	chr9	-	0	0.329	0	0.662	0.329	1	-0.554	4.661e-08	2.86118e-06	SE	123089032-123089156~123090976-123091132~123100258-123100592
SE.14402	ENSMUSG00000051747.15	Ttn	chr2	-	0.984	0.982	0.968	0.998	0.988	0.998	-0.017	4.72288e-08	2.89109e-06	SE	76883909-76884197~76888885-76889173~76903062-76903626
RI.838	ENSMUSG00000024845.17	Tmem134	chr19	+	0.091	0.144	0.072	0.237	0.245	0.251	-0.142	4.02616e-09	2.92299e-06	RI	4127549-4127639~4127549-4127836~4127759-4127836
A3SS.1311	ENSMUSG00000030409.16	Dmpk	chr7	+	0.208	0.206	0.183	0.331	0.298	0.39	-0.141	6.90339e-09	3.00495e-06	A3SS	19091938-19092254~19092417-19092546~19092546-19092632
SE.3197	ENSMUSG00000006611.15	Hfe	chr13	-	0.794	1	0.935	0.509	0.337	0.491	0.464	5.03525e-08	3.07374e-06	SE	23706766-23707066~23708027-23708291~23710626-23710854
MXE.1436	ENSMUSG00000051747.15	Ttn	chr2	-	0.9	0.917	0.911	0.833	0.812	0.862	0.074	1.18884e-07	3.0798e-06	MXE	76817788-76817863~76818735-76818816;76821115-76821184~76822450-76822564
RI.742	ENSMUSG00000043822.18	Adamtsl5	chr10	-	0.615	0.526	0.598	0.777	0.823	0.801	-0.221	7.09379e-09	3.24282e-06	RI	80342306-80342393~80342306-80343020~80342908-80343020
RI.1348	ENSMUSG00000019194.15	Scn1b	chr7	-	0.143	0.13	0.162	0.266	0.237	0.205	-0.091	7.26541e-09	3.24282e-06	RI	31116523-31117136~31116523-31117295~31117223-31117295
RI.1917	ENSMUSG00000038619.12	Ensa	chr3	+	0.984	0.962	0.988	0.89	0.871	0.878	0.098	7.81672e-09	3.24282e-06	RI	95628540-95628707~95628540-95632102~95631431-95632102
A5SS.1239	ENSMUSG00000029106.14	Add1	chr5	+	0.145	0.032	0.068	0.238	0.215	0.332	-0.18	1.46794e-08	3.31571e-06	A5SS	34616562-34616814~34616814-34616907~34619349-34619451
SE.11212	ENSMUSG00000028906.17	Epb41	chr4	-	0.807	0.646	0.856	1	1	1	-0.23	5.47256e-08	3.33144e-06	SE	131935738-131935867~131937014-131937464~131955527-131955578
SE.9499	ENSMUSG00000064080.12	Fbln2	chr6	+	0.537	0.586	0.475	0.739	0.693	0.742	-0.192	5.56278e-08	3.37701e-06	SE	91257724-91257826~91259629-91259770~91263338-91263473
SE.17647	ENSMUSG00000097354.7	2310001H17Rik	chr6	-	1	1	1	0.766	0.798	0.493	0.314	5.68099e-08	3.43927e-06	SE	129212735-129216536~129233063-129233153~129237738-129237857
SE.3390	ENSMUSG00000097451.11	Rian	chr12	+	0.797	0.567	0.766	0.112	0.164	0.167	0.562	5.89966e-08	3.56184e-06	SE	109627148-109627153~109634275-109634354~109635393-109635457
SE.9771	ENSMUSG00000021557.15	Agtpbp1	chr13	-	0.974	1	1	0.837	0.789	1	0.116	6.75493e-08	4.05591e-06	SE	59445741-59450314~59460468-59460629~59461996-59462173
SE.19356	ENSMUSG00000055320.18	Tead1	chr7	+	0.395	0.501	0.28	0.125	0.158	0.111	0.261	6.75486e-08	4.05591e-06	SE	112839415-112839480~112841887-112841950~112842039-112842102
SE.14119	ENSMUSG00000051747.15	Ttn	chr2	-	0.07	0.073	0.034	0.186	0.14	0.287	-0.145	7.0147e-08	4.20041e-06	SE	76831787-76831874~76841767-76841836~76850569-76850644
MXE.584	ENSMUSG00000026950.18	Neb	chr2	-	0.812	0.823	0.674	0.911	0.917	0.926	-0.148	1.73994e-07	4.40384e-06	MXE	52150966-52151059~52153682-52153775;52156354-52156447~52157290-52157383
MXE.1345	ENSMUSG00000061462.18	Obscn	chr11	-	0.665	0.647	0.664	0.781	0.811	0.796	-0.137	1.72621e-07	4.40384e-06	MXE	59055960-59056224~59061423-59061687;59062030-59062294~59062646-59062910
MXE.1911	ENSMUSG00000039126.10	Prune2	chr19	+	0.087	0.195	0	0.512	0.84	0.599	-0.556	1.7624e-07	4.41e-06	MXE	17211677-17211713~17212291-17212330;17216325-17216373~17220783-17223932
MXE.1530	ENSMUSG00000051747.15	Ttn	chr2	-	0.785	0.797	0.805	0.69	0.755	0.653	0.096	1.82162e-07	4.50698e-06	MXE	76896698-76896980~76897121-76897400;76903062-76903626~76906253-76906532
MXE.577	ENSMUSG00000026950.18	Neb	chr2	-	0.029	0.032	0.039	0.012	0.015	0.012	0.02	1.86352e-07	4.55942e-06	MXE	52151363-52151456~52153055-52153148;52153682-52153775~52157290-52157383
A3SS.1791	ENSMUSG00000058254.12	Tspan7	chrX	+	0.881	1	1	0.462	0.671	0.5	0.416	1.29439e-08	4.93e-06	A3SS	10585496-10585652~10590135-10595278~10595278-10595354
MXE.1065	ENSMUSG00000051586.17	Mical3	chr6	-	0	0.11	0.526	0.886	0.922	0.778	-0.65	2.06316e-07	4.99239e-06	MXE	120962754-120962865~120966053-120966116;120969354-120969492~120973402-120973647
SE.13972	ENSMUSG00000051747.15	Ttn	chr2	-	1	1	1	0.084	0.865	0.243	0.603	8.40063e-08	5.01664e-06	SE	76818735-76818816~76826994-76827078~76857903-76857987
MXE.1533	ENSMUSG00000051747.15	Ttn	chr2	-	0.871	0.879	0.9	0.795	0.876	0.778	0.067	2.24468e-07	5.3726e-06	MXE	76898444-76898723~76898837-76899116;76903062-76903626~76906253-76906532
SE.8526	ENSMUSG00000042520.16	Ubap2l	chr3	-	0.069	0	0	0.219	0.691	0.691	-0.511	9.12016e-08	5.43156e-06	SE	90000139-90000253~90001817-90001868~90002278-90002476
SE.3772	ENSMUSG00000037989.15	Wnk2	chr13	-	0.765	0.892	0.826	0.584	0.498	0.509	0.297	9.37099e-08	5.56586e-06	SE	49044373-49044418~49050483-49050582~49052558-49052773
SE.4224	ENSMUSG00000003518.13	Dusp3	chr11	-	0.846	0.876	0.881	0.73	0.764	0.752	0.119	9.47204e-08	5.61072e-06	SE	101971142-101974939~101981616-101981843~101984611-101984751
SE.14157	ENSMUSG00000051747.15	Ttn	chr2	-	0.965	0.892	0.953	0.743	0.752	0.769	0.182	9.56278e-08	5.64924e-06	SE	76838811-76838895~76847112-76847196~76847387-76847471
SE.21153	ENSMUSG00000051705.13	Senp8	chr9	-	0.171	0.59	0.382	1	1	1	-0.619	9.8674e-08	5.81356e-06	SE	59734452-59737868~59739939-59740032~59750261-59750371
SE.17685	ENSMUSG00000030189.15	Ybx3	chr6	-	0.256	0.201	0.201	0.393	0.284	0.337	-0.119	9.91183e-08	5.82413e-06	SE	131370322-131370414~131375973-131376180~131379357-131379480
SE.193	ENSMUSG00000019088.14	Dnase1l1	chrX	-	0.467	0.33	0.345	0	0	0	0.381	9.97557e-08	5.84595e-06	SE	74273216-74273691~74276478-74276556~74277038-74277342
SE.16229	ENSMUSG00000061904.12	Slc25a3	chr10	-	0.961	0.966	0.959	0.906	0.93	0.932	0.039	1.15527e-07	6.75219e-06	SE	91121921-91122043~91122206-91122331~91123557-91123706
MXE.809	ENSMUSG00000033502.15	Cdc14a	chr3	-	0.095	0	0	0.431	0.486	0.321	-0.381	2.88155e-07	6.82278e-06	MXE	116351205-116351272~116366626-116366706;116392821-116392914~116422566-116422649
SE.6360	ENSMUSG00000028759.13	Hp1bp3	chr4	+	0.962	1	1	0.835	0.59	0.771	0.255	1.1746e-07	6.84696e-06	SE	138216295-138216740~138221525-138221723~138222088-138222188
SE.21767	ENSMUSG00000025786.17	Zdhhc3	chr9	-	0	0.14	0	0.495	0.329	0.855	-0.513	1.18328e-07	6.8793e-06	SE	123089032-123089156~123090976-123091132~123098922-123098974
A5SS.158	ENSMUSG00000068663.14	Clec16a	chr16	+	0.516	0.507	0.556	0.204	0.161	0.339	0.292	3.45781e-08	6.94251e-06	A5SS	10595801-10595985~10595985-10596033~10611002-10611135
SE.7851	ENSMUSG00000031137.17	Fgf13	chrX	-	0.972	1	1	0.868	0.877	0.868	0.12	1.21342e-07	7.03193e-06	SE	59131876-59131950~59250798-59250966~59567139-59567472
SE.14488	ENSMUSG00000051747.15	Ttn	chr2	-	0.325	0.338	0.255	0.591	0.418	0.661	-0.251	1.21593e-07	7.03193e-06	SE	76894141-76894423~76894659-76894902~76903062-76903626
SE.13212	ENSMUSG00000061462.18	Obscn	chr11	-	0.036	0.03	0.034	0.081	0.068	0.124	-0.058	1.22574e-07	7.07006e-06	SE	59053573-59053837~59054161-59054425~59067065-59067329
SE.18928	ENSMUSG00000027763.13	Mbnl1	chr3	+	0.701	0.745	0.758	0.566	0.577	0.633	0.143	1.2974e-07	7.4638e-06	SE	60501178-60501423~60528755-60529804~60595593-60595764
SE.5716	ENSMUSG00000026950.18	Neb	chr2	-	0.962	0.971	0.942	0.874	0.909	0.873	0.073	1.31059e-07	7.50042e-06	SE	52150536-52150629~52157290-52157383~52157831-52157912
SE.18927	ENSMUSG00000027763.13	Mbnl1	chr3	+	0.969	0.996	0.958	0.889	0.931	0.83	0.091	1.31053e-07	7.50042e-06	SE	60473041-60473173~60528755-60529804~60595593-60595764
SE.5740	ENSMUSG00000026950.18	Neb	chr2	-	0.936	0.928	0.899	0.955	0.99	0.926	-0.036	1.33367e-07	7.61266e-06	SE	52183731-52183836~52185270-52185375~52186011-52186116
SE.7670	ENSMUSG00000053819.16	Camk2d	chr3	+	0.834	0.976	0.865	0.671	0.673	0.676	0.218	1.39364e-07	7.93434e-06	SE	126840136-126840365~126841484-126841573~126842757-126843218
SE.16881	ENSMUSG00000003476.16	Crhr2	chr6	-	0.916	0.942	0.909	0.721	0.632	0.724	0.23	1.41587e-07	8.0401e-06	SE	55117413-55117539~55123682-55123773~55132769-55132841
SE.14827	ENSMUSG00000001911.16	Nfix	chr8	-	0.123	0.061	0.119	0.164	0.156	0.235	-0.084	1.41996e-07	8.04251e-06	SE	84713765-84713857~84716140-84716288~84721642-84721818
SE.19894	ENSMUSG00000022353.10	Mtss1	chr15	-	0.063	0.023	0	0.236	0.55	0.176	-0.292	1.49799e-07	8.46267e-06	SE	58947325-58947520~58948322-58948442~58951469-58951680
SE.21161	ENSMUSG00000027438.14	Napb	chr2	-	0.16	0	0	0.553	0.696	0.276	-0.455	1.54854e-07	8.72583e-06	SE	148706945-148707023~148707158-148707205~148709316-148709433
MXE.1335	ENSMUSG00000061462.18	Obscn	chr11	-	0.792	0.781	0.819	0.916	0.897	0.917	-0.113	3.91124e-07	9.16229e-06	MXE	59053573-59053837~59054161-59054425;59054773-59055037~59055376-59055640
MXE.595	ENSMUSG00000026950.18	Neb	chr2	-	0.62	0.65	0.669	0.821	0.705	0.835	-0.141	4.0164e-07	9.30958e-06	MXE	52154569-52154662~52156354-52156447;52157290-52157383~52157831-52157924
SE.3280	ENSMUSG00000023805.17	Synj2	chr17	+	1	1	1	0.85	0.854	0.674	0.207	1.70414e-07	9.57154e-06	SE	6028418-6028586~6029683-6029834~6032696-6032809
SE.14283	ENSMUSG00000051747.15	Ttn	chr2	-	0.858	0.847	0.694	0.966	0.928	1	-0.165	1.70734e-07	9.57154e-06	SE	76852056-76852137~76857396-76857474~76857609-76857690
SE.18328	ENSMUSG00000029095.17	Ablim2	chr5	+	1	1	0.969	0.75	0.809	0.919	0.164	1.72106e-07	9.62392e-06	SE	35828123-35828182~35831685-35831742~35833052-35833130
MXE.752	ENSMUSG00000029862.16	Clcn1	chr6	+	0.166	0.15	0	0.351	0.575	0.82	-0.477	4.19896e-07	9.63136e-06	MXE	42292940-42293018~42293443-42293522;42294074-42294156~42298798-42298924
SE.4950	ENSMUSG00000000378.15	Ccm2	chr11	+	0.89	1	1	0.812	0.506	0.603	0.323	1.76021e-07	9.81788e-06	SE	6546886-6547029~6569963-6570137~6584519-6584603
SE.7823	ENSMUSG00000063235.16	Ptpmt1	chr2	-	0.983	1	1	0.863	0.963	0.801	0.119	1.77501e-07	9.87537e-06	SE	90908715-90911319~90913983-90914175~90916853-90916911
SE.2338	ENSMUSG00000033004.16	Mycbp2	chr14	-	0.208	0.193	0.262	0.514	0.417	0.445	-0.238	1.83449e-07	1.01805e-05	SE	103155123-103156767~103169856-103170012~103172566-103172689
SE.15478	ENSMUSG00000037712.16	Fermt2	chr14	-	0.797	0.771	0.828	0.532	0.697	0.56	0.202	1.89126e-07	1.04691e-05	SE	45475897-45476113~45476417-45476450~45482431-45482566
SE.20048	ENSMUSG00000031636.7	Pdlim3	chr8	+	0.408	0.632	0.462	0.075	0.149	0.05	0.409	1.97863e-07	1.09252e-05	SE	45908468-45908656~45909018-45909086~45915128-45915259
SE.14195	ENSMUSG00000051747.15	Ttn	chr2	-	0.006	0.009	0	0.041	0.024	0.04	-0.03	2.09538e-07	1.15409e-05	SE	76847724-76847808~76848558-76848642~76850569-76850644
SE.14581	ENSMUSG00000051747.15	Ttn	chr2	-	0.225	0.232	0.205	0.485	0.322	0.597	-0.247	2.13737e-07	1.17233e-05	SE	76894141-76894423~76901463-76901742~76903062-76903626
SE.18046	ENSMUSG00000032826.19	Ank2	chr3	-	0.168	0.112	0.143	0.464	0.252	0.331	-0.208	2.13918e-07	1.17233e-05	SE	127023291-127023390~127029218-127029317~127032115-127032313
RI.2740	ENSMUSG00000021493.15	Pdlim7	chr13	-	0.125	0.112	0.152	0.306	0.309	0.197	-0.141	3.30531e-08	1.19983e-05	RI	55507329-55507366~55507329-55507624~55507487-55507624
SE.17885	ENSMUSG00000035203.16	Epn1	chr7	+	0.982	0.996	0.976	0.958	0.942	0.899	0.052	2.20802e-07	1.20705e-05	SE	5083662-5083982~5089918-5090168~5092840-5092965
SE.16986	ENSMUSG00000030852.18	Tacc2	chr7	+	0.799	0.887	0.869	0.401	0.706	0.352	0.365	2.21763e-07	1.2093e-05	SE	130742129-130742301~130744526-130744616~130751189-130751333
SE.14266	ENSMUSG00000051747.15	Ttn	chr2	-	0.035	0	0.01	0.037	0.156	0.136	-0.095	2.27962e-07	1.24002e-05	SE	76831787-76831874~76854386-76854467~76857903-76857987
SE.7352	ENSMUSG00000028207.18	Asph	chr4	-	1	1	1	0.793	0.571	0.651	0.328	2.33659e-07	1.26787e-05	SE	9604515-9604629~9607796-9607871~9610842-9610938
SE.14063	ENSMUSG00000051747.15	Ttn	chr2	-	0.026	0.074	0.037	0.188	0.084	0.38	-0.172	2.38315e-07	1.28996e-05	SE	76831787-76831874~76838811-76838895~76850569-76850644
RI.2534	ENSMUSG00000042606.9	Hirip3	chr7	+	0	0	0	0.288	0.68	1	-0.656	4.10675e-08	1.32511e-05	RI	126862599-126862720~126862599-126862926~126862817-126862926
SE.381	ENSMUSG00000025006.18	Sorbs1	chr19	-	0.833	0.79	0.635	0.968	1	0.944	-0.218	2.46248e-07	1.32962e-05	SE	40336985-40337035~40340684-40340750~40344355-40344439
SE.2332	ENSMUSG00000048349.9	Pou4f1	chr14	-	1	0.502	1	0.191	0.226	0.23	0.618	2.48675e-07	1.33943e-05	SE	104461675-104464544~104465684-104466871~104467610-104467999
SE.5861	ENSMUSG00000029208.16	Guf1	chr5	+	0.866	0.912	0.903	0.585	0.453	0.423	0.407	2.5503e-07	1.3703e-05	SE	69561653-69561857~69563082-69563222~69564523-69564647
SE.3858	ENSMUSG00000021843.17	Ktn1	chr14	+	0.747	0.918	0.907	0.521	0.645	0.593	0.271	2.55759e-07	1.37087e-05	SE	47704186-47704277~47704419-47704488~47705762-47705800
SE.7551	ENSMUSG00000045962.16	Wnk1	chr6	-	0.893	0.845	0.83	0.965	0.982	0.94	-0.106	2.64282e-07	1.41311e-05	SE	119929832-119929867~119932689-119932761~119934255-119934329
MXE.1543	ENSMUSG00000051747.15	Ttn	chr2	-	0.808	0.805	0.838	0.703	0.786	0.663	0.1	6.23351e-07	1.41507e-05	MXE	76900756-76901035~76901463-76901742;76903062-76903626~76906253-76906532
MXE.1481	ENSMUSG00000051747.15	Ttn	chr2	-	0.374	0.283	0.303	0.143	0.244	0.181	0.131	6.3223e-07	1.42058e-05	MXE	76856802-76856904~76857154-76857229;76857396-76857474~76857609-76857690
SE.14177	ENSMUSG00000051747.15	Ttn	chr2	-	0.243	0.243	0.155	0.762	1	0.658	-0.593	2.77322e-07	1.47923e-05	SE	76841089-76841389~76847387-76847471~76850569-76850644
SE.14052	ENSMUSG00000051747.15	Ttn	chr2	-	0	0.394	0	0.722	0.661	0.796	-0.595	2.88497e-07	1.53511e-05	SE	76831787-76831874~76836732-76836813~76838568-76838643
SE.10255	ENSMUSG00000069631.14	Strada	chr11	-	1	1	1	0.9	0.732	0.692	0.225	3.14992e-07	1.67204e-05	SE	106168308-106168480~106170953-106171077~106171155-106171264
MXE.1989	ENSMUSG00000025085.16	Ablim1	chr19	-	1	1	1	0.458	0.297	1	0.415	7.51882e-07	1.67237e-05	MXE	57068859-57068937~57073854-57073902;57077413-57077497~57079812-57079871
SE.17200	ENSMUSG00000029993.16	Nfu1	chr6	+	0.303	0.203	0.37	0.137	0.05	0.056	0.211	3.16374e-07	1.67534e-05	SE	87015565-87015701~87016175-87016394~87019364-87019431
SE.13288	ENSMUSG00000061462.18	Obscn	chr11	-	0.76	0.514	0.659	1	1	1	-0.356	3.25515e-07	1.7196e-05	SE	59085064-59085340~59086664-59086940~59093295-59093571
SE.6997	ENSMUSG00000028863.13	Meaf6	chr4	+	0.743	1	0.591	0.265	0.213	0.046	0.603	3.413e-07	1.79435e-05	SE	125102838-125103031~125107651-125107709~125108322-125108356
SE.14529	ENSMUSG00000051747.15	Ttn	chr2	-	0.201	0.224	0.179	0.454	0.286	0.557	-0.231	3.4076e-07	1.79435e-05	SE	76894141-76894423~76898444-76898723~76903062-76903626
SE.4960	ENSMUSG00000041164.15	Zmiz2	chr11	+	0.56	0.439	0.456	0.795	0.71	0.827	-0.292	3.44889e-07	1.8089e-05	SE	6397506-6397686~6398261-6398339~6398555-6398724
SE.9498	ENSMUSG00000064080.12	Fbln2	chr6	+	0	0	0	0.411	0.259	0.848	-0.506	3.48323e-07	1.82256e-05	SE	91215174-91215352~91218827-91218892~91233062-91233304
SE.19796	ENSMUSG00000010751.15	Tnfrsf22	chr7	-	0	0.339	0.435	0.822	1	1	-0.683	3.58774e-07	1.87279e-05	SE	143636724-143638436~143639244-143639289~143639901-143639975
SE.13884	ENSMUSG00000057110.15	Cntrl	chr2	+	0.881	1	1	0.689	0.425	0	0.589	3.71271e-07	1.93342e-05	SE	35129620-35129815~35133957-35134111~35135467-35135688
RI.2572	ENSMUSG00000029472.13	Anapc5	chr5	-	0.082	0.073	0.076	0.121	0.125	0.139	-0.051	6.83539e-08	1.985e-05	RI	122799338-122799474~122799338-122800593~122800450-122800593
SE.20054	ENSMUSG00000031634.13	Ufsp2	chr8	+	1	1	1	0.923	0.863	0.716	0.166	3.84283e-07	1.99646e-05	SE	45984040-45984233~45985321-45985468~45991747-45991813
SE.12552	ENSMUSG00000042198.12	Chchd7	chr4	+	0	0	0	0.173	0.258	0.09	-0.174	3.89584e-07	2.01922e-05	SE	3942720-3942819~3942987-3943026~3943387-3943528
SE.3032	ENSMUSG00000037341.14	Slc9a7	chrX	-	0.625	0.472	0.517	0.915	1	0.935	-0.412	4.00176e-07	2.06924e-05	SE	20131770-20131834~20138912-20138972~20158814-20158968
SE.6344	ENSMUSG00000062519.13	Zfp398	chr6	+	1	1	1	0.836	0.622	0.92	0.207	4.11842e-07	2.12456e-05	SE	47835663-47835920~47840251-47840647~47858928-47859055
SE.13971	ENSMUSG00000051747.15	Ttn	chr2	-	1	1	1	0.857	0.74	0.881	0.174	4.22266e-07	2.17324e-05	SE	76818735-76818816~76826994-76827078~76847387-76847471
SE.9964	ENSMUSG00000058835.14	Abi1	chr2	-	0.973	1	1	0.804	0.838	0.893	0.146	4.38374e-07	2.25087e-05	SE	22946575-22946761~22950183-22950270~22953434-22953608
SE.10186	ENSMUSG00000034800.15	Zfp661	chr2	-	1	1	1	0.214	0.12	1	0.555	4.49559e-07	2.30291e-05	SE	127581475-127581546~127581858-127582075~127584629-127584669
A5SS.1498	ENSMUSG00000053964.17	Lgals4	chr7	+	0.14	0	0	0	1	1	-0.62	1.31701e-07	2.37984e-05	A5SS	28840580-28840610~28840610-28840691~28840863-28840952
SE.2857	ENSMUSG00000021759.14	Plpp1	chr13	+	1	1	1	0.852	0.973	0.799	0.125	4.67023e-07	2.38424e-05	SE	112800862-112801266~112851402-112851554~112856745-112857026
SE.21961	ENSMUSG00000010461.15	Eya4	chr10	-	0.306	0.422	0.578	0.068	0.093	0.111	0.345	4.67604e-07	2.38424e-05	SE	23163393-23163486~23171625-23171694~23172998-23173123
SE.18715	ENSMUSG00000055489.8	Ano5	chr7	+	0.912	0.947	0.897	0.978	1	0.992	-0.071	4.69945e-07	2.39063e-05	SE	51585322-51585528~51587637-51587816~51593623-51594360
SE.9207	ENSMUSG00000027646.15	Src	chr2	+	0	0	0	0.338	0.51	0.121	-0.323	4.72589e-07	2.39853e-05	SE	157458533-157458633~157458842-157458860~157462709-157462808
SE.14012	ENSMUSG00000051747.15	Ttn	chr2	-	1	1	1	0.632	0.895	0.895	0.193	4.77789e-07	2.41377e-05	SE	76818735-76818816~76831787-76831874~76857903-76857987
SE.17043	ENSMUSG00000056698.11	Elmod3	chr6	-	0.453	0.216	0.356	1	0.713	1	-0.563	4.77514e-07	2.41377e-05	SE	72594739-72595020~72596435-72596466~72598321-72598342
SE.19783	ENSMUSG00000061723.18	Tnnt3	chr7	+	0.028	0.013	0.011	0.002	0.002	0.003	0.015	5.00909e-07	2.52476e-05	SE	142512531-142512622~142513664-142513705~142514325-142514366
SE.5223	ENSMUSG00000019966.18	Kitl	chr10	+	0.788	0.706	0.509	1	0.906	0.947	-0.283	5.02265e-07	2.52581e-05	SE	100079973-100080130~100080856-100080940~100087346-100087456
SE.20147	ENSMUSG00000029769.16	Ccdc136	chr6	+	1	1	1	0.848	0.629	0.548	0.325	5.03683e-07	2.52715e-05	SE	29411247-29411385~29411709-29411868~29412363-29412534
SE.13211	ENSMUSG00000061462.18	Obscn	chr11	-	0.168	0.112	0.101	0.315	0.26	0.437	-0.21	5.26812e-07	2.63718e-05	SE	59053573-59053837~59054161-59054425~59064186-59064450
SE.6410	ENSMUSG00000027255.14	Arfgap2	chr2	+	0.827	0.983	0.912	0.61	0.573	0.61	0.31	5.84329e-07	2.91846e-05	SE	91268451-91268508~91269069-91269111~91269451-91269504
SE.21155	ENSMUSG00000051705.13	Senp8	chr9	-	0.16	0.534	0.741	1	1	1	-0.522	5.91751e-07	2.94883e-05	SE	59737261-59737868~59739939-59740051~59750261-59750371
MXE.427	ENSMUSG00000020882.17	Cacnb1	chr11	-	0.963	0.935	0.981	0.901	0.92	0.913	0.048	1.34446e-06	2.96049e-05	MXE	98009857-98009916~98010003-98010376;98011342-98011497~98011865-98011942
RI.2422	ENSMUSG00000030470.15	Csrp3	chr7	-	0.007	0.006	0.006	0.014	0.021	0.018	-0.011	1.122e-07	2.96208e-05	RI	48833738-48833871~48833738-48835635~48835466-48835635
SE.4520	ENSMUSG00000000282.12	Mnt	chr11	+	1	1	1	0.732	0.41	0.916	0.314	6.08506e-07	3.02546e-05	SE	74836325-74836948~74837430-74837472~74837611-74837723
SE.5375	ENSMUSG00000061589.14	Dot1l	chr10	+	0.549	1	1	0.061	0.314	0.092	0.694	6.10374e-07	3.0279e-05	SE	80790610-80791561~80791743-80791839~80792142-80792773
A3SS.2377	ENSMUSG00000024201.12	Kdm4b	chr17	+	1	0.918	1	0.866	0.796	0.853	0.134	9.07999e-08	3.07408e-05	A3SS	56394789-56394889~56396203-56396221~56396221-56396382
SE.9059	ENSMUSG00000008435.15	Rdh13	chr7	-	0.493	0.421	0.618	0.774	1	0.848	-0.363	6.34513e-07	3.14056e-05	SE	4431421-4431634~4434993-4435098~4442593-4442749
SE.5624	ENSMUSG00000026950.18	Neb	chr2	-	0.889	1	1	0.755	0.597	0.531	0.335	6.38653e-07	3.15394e-05	SE	52149589-52149697~52150966-52151059~52153055-52153148
SE.1900	ENSMUSG00000023008.18	Fmnl3	chr15	-	0.308	0.165	0.33	0.054	0.097	0	0.217	6.48232e-07	3.19407e-05	SE	99327843-99328166~99329093-99329176~99329279-99329432
SE.3660	ENSMUSG00000021103.12	Mnat1	chr12	+	0.904	1	1	0.707	0.501	0.251	0.482	6.50794e-07	3.19952e-05	SE	73167999-73168152~73170593-73170667~73179204-73179308
RI.1235	ENSMUSG00000098754.7	Prn	chr2	+	1	1	1	0.697	0.758	0.519	0.342	1.52427e-07	3.43053e-05	RI	131953008-131953582~131953008-131956130~131954820-131956130
RI.1773	ENSMUSG00000039660.16	Spout1	chr2	-	1	1	1	0.737	0.393	0.492	0.459	1.53571e-07	3.43053e-05	RI	30177592-30177721~30177592-30177965~30177919-30177965
SE.3416	ENSMUSG00000021268.17	Meg3	chr12	+	1	0.464	0.415	0.075	0.094	0.065	0.548	7.11384e-07	3.48959e-05	SE	109546429-109546542~109549290-109549371~109549478-109549552
SE.19776	ENSMUSG00000031097.15	Tnni2	chr7	+	1	1	1	0.625	0.294	0.217	0.621	7.22252e-07	3.53501e-05	SE	142441807-142441868~142442468-142442498~142443170-142443212
A3SS.562	ENSMUSG00000050106.17	Tmc8	chr11	+	1	1	0	0.14	0	0	0.62	1.41309e-07	3.61634e-05	A3SS	117783770-117783920~117784109-117784112~117784112-117784195
A3SS.1651	ENSMUSG00000026153.15	Fam135a	chr1	-	0.769	0.803	0.573	1	1	1	-0.285	1.42422e-07	3.61634e-05	A3SS	24028199-24029940~24029940-24030528~24032662-24032736
A3SS.2493	ENSMUSG00000040940.18	Arhgef1	chr7	+	0.729	0.792	0.813	0.9	0.985	0.972	-0.174	1.26849e-07	3.61634e-05	A3SS	24916017-24916053~24916800-24916803~24916803-24916941
SE.11213	ENSMUSG00000028906.17	Epb41	chr4	-	0.875	0.662	0.731	1	1	0.913	-0.215	7.40999e-07	3.61871e-05	SE	131935738-131935867~131937014-131937464~131955542-131955578
SE.18123	ENSMUSG00000021987.9	Mtmr6	chr14	+	0.153	0.148	0.134	0.071	0.061	0.057	0.082	7.68921e-07	3.74674e-05	SE	60265272-60265361~60270358-60270549~60277128-60277245
SE.14209	ENSMUSG00000051747.15	Ttn	chr2	-	0.7	0.885	0.804	0.939	1	0.978	-0.176	7.86742e-07	3.8251e-05	SE	76841089-76841389~76850305-76850380~76850569-76850644
SE.1902	ENSMUSG00000023007.15	Prpf40b	chr15	+	1	0.633	1	0.126	0.601	0.079	0.609	8.14052e-07	3.94914e-05	SE	99295240-99295273~99301786-99301984~99303282-99303363
SE.9305	ENSMUSG00000063382.6	Bcl9l	chr9	+	0.855	0.943	0.977	0.676	0.769	0.607	0.241	8.25321e-07	3.98621e-05	SE	44482865-44483486~44489654-44489711~44500744-44500800
SE.19366	ENSMUSG00000032380.9	Dapk2	chr9	+	1	0.981	1	0.947	0.863	0.915	0.085	8.25036e-07	3.98621e-05	SE	66220533-66220755~66231712-66231851~66246416-66246546
MXE.794	ENSMUSG00000045962.16	Wnk1	chr6	-	0.309	0.321	0.368	0.433	0.484	0.406	-0.108	1.82987e-06	3.98948e-05	MXE	119951897-119951995~119952684-119952969;119953770-119954232~119956070-119956196
SE.20996	ENSMUSG00000109324.2	Prmt1	chr7	-	0.504	0.387	0.436	0.192	0.256	0.123	0.252	9.22802e-07	4.44726e-05	SE	44983485-44983587~44984079-44984133~44986282-44986356
SE.7824	ENSMUSG00000063235.16	Ptpmt1	chr2	-	1	1	1	0.893	0.939	0.874	0.098	9.30672e-07	4.47537e-05	SE	90908715-90911319~90913983-90914175~90917428-90917509
SE.3386	ENSMUSG00000097451.11	Rian	chr12	+	1	1	0.862	0.535	0.515	0.537	0.425	9.47069e-07	4.54428e-05	SE	109627047-109627132~109634193-109634354~109635393-109635457
SE.9402	ENSMUSG00000022307.16	Oxr1	chr15	+	0.781	0.679	0.855	1	1	1	-0.228	1.00921e-06	4.83192e-05	SE	41819838-41820578~41823326-41823495~41825889-41826052
SE.3697	ENSMUSG00000021000.17	Mia2	chr12	+	0.099	0.071	0.135	0.317	0.375	0.311	-0.233	1.01542e-06	4.85106e-05	SE	59137697-59137786~59144698-59144770~59146335-59146362
SE.14051	ENSMUSG00000051747.15	Ttn	chr2	-	0.779	0.517	0.681	1	1	1	-0.341	1.02485e-06	4.88549e-05	SE	76832100-76832184~76832267-76832351~76857903-76857987
SE.18481	ENSMUSG00000019854.17	Reps1	chr10	+	0.079	0.109	0.092	0.311	0.317	0.448	-0.265	1.02966e-06	4.89777e-05	SE	18104153-18104275~18107670-18107748~18114398-18114486
SE.2838	ENSMUSG00000033083.16	Tbc1d4	chr14	-	1	1	1	0.76	1	0.548	0.231	1.03568e-06	4.90832e-05	SE	101465600-101465764~101475076-101475241~101476979-101477206
SE.14111	ENSMUSG00000051747.15	Ttn	chr2	-	0.039	0.039	0	0.177	0.186	0.124	-0.136	1.0384e-06	4.90832e-05	SE	76826994-76827078~76841767-76841836~76847387-76847471
SE.18323	ENSMUSG00000024875.5	Yif1a	chr19	+	0.868	0.93	0.945	1	0.983	1	-0.08	1.03857e-06	4.90832e-05	SE	5091540-5091696~5092128-5092222~5092301-5092501
SE.2856	ENSMUSG00000021759.14	Plpp1	chr13	+	1	1	1	0.874	0.975	0.835	0.105	1.09516e-06	5.1549e-05	SE	112800791-112801266~112834858-112835013~112856745-112857026
SE.19150	ENSMUSG00000018909.15	Arrb1	chr7	+	0.683	0.821	0.404	0.141	0.223	0.067	0.492	1.09544e-06	5.1549e-05	SE	99596022-99596106~99597035-99597059~99598490-99598561
SE.2979	ENSMUSG00000005583.16	Mef2c	chr13	+	0.906	0.918	0.926	0.832	0.878	0.831	0.07	1.10938e-06	5.20935e-05	SE	83592777-83592981~83625469-83625607~83633054-83633241
MXE.248	ENSMUSG00000021798.14	Ldb3	chr14	-	0.977	0.977	0.976	0.934	0.956	0.97	0.023	2.47536e-06	5.29198e-05	MXE	34567397-34567567~34569712-34569727;34571717-34571921~34572989-34573012
MXE.2130	ENSMUSG00000032355.16	Mlip	chr9	-	0.934	0.914	0.958	0.844	0.894	0.816	0.084	2.45438e-06	5.29198e-05	MXE	77181351-77181396~77216976-77217048;77229484-77230954~77239391-77239784
MXE.1524	ENSMUSG00000051747.15	Ttn	chr2	-	0.771	0.762	0.811	0.648	0.746	0.693	0.086	2.52024e-06	5.33612e-05	MXE	76894623-76894902~76895141-76895429;76903062-76903626~76906253-76906532
SE.19530	ENSMUSG00000053877.12	Srcap	chr7	+	0.226	0.234	0.233	0.427	0.581	0.506	-0.274	1.16589e-06	5.46303e-05	SE	127539756-127539921~127540250-127540433~127540655-127540922
SE.10115	ENSMUSG00000029992.14	Gfpt1	chr6	+	0.802	0.847	0.845	0.219	0.5	0.543	0.411	1.19695e-06	5.59663e-05	SE	87060520-87060600~87060784-87060832~87063804-87063910
A3SS.1312	ENSMUSG00000030409.16	Dmpk	chr7	+	0.188	0.182	0.154	0.283	0.258	0.299	-0.105	2.46958e-07	5.78832e-05	A3SS	19092207-19092254~19092417-19092542~19092542-19092632
SE.6510	ENSMUSG00000037692.14	Ahdc1	chr4	+	1	1	0.409	0.172	0.172	0	0.688	1.24392e-06	5.8039e-05	SE	133055012-133055203~133055294-133055505~133060661-133060822
RI.469	ENSMUSG00000035711.5	Dok3	chr13	-	1	1	1	0.457	1	0.229	0.438	3.19993e-07	5.80787e-05	RI	55527331-55527637~55527331-55528554~55528448-55528554
RI.1985	ENSMUSG00000032322.14	Pstpip1	chr9	+	1	1	1	0.768	0.804	0.33	0.366	3.13746e-07	5.80787e-05	RI	56123747-56123793~56123747-56124673~56124593-56124673
RI.2820	ENSMUSG00000037742.14	Eef1a1	chr9	-	0.021	0.028	0.019	0.03	0.018	0.097	-0.026	3.14083e-07	5.80787e-05	RI	78479277-78479534~78479277-78479774~78479623-78479774
SE.15872	ENSMUSG00000027506.15	Tpd52	chr3	-	0.597	0.54	0.533	0.906	0.831	0.93	-0.332	1.24767e-06	5.80905e-05	SE	8934991-8935040~8936438-8936480~8943550-8943577
SE.11194	ENSMUSG00000026150.14	Mff	chr1	+	0.913	0.89	0.82	0.579	0.76	0.44	0.281	1.26072e-06	5.8574e-05	SE	82735418-82735507~82741817-82741976~82747082-82747142
SE.196	ENSMUSG00000019088.14	Dnase1l1	chrX	-	0.952	0.856	0.918	0.653	0.568	0.632	0.291	1.33901e-06	6.20802e-05	SE	74274367-74274468~74276478-74276556~74277038-74277342
SE.5926	ENSMUSG00000021870.17	Slmap	chr14	-	0.745	0.754	0.611	0.855	0.896	0.883	-0.175	1.35977e-06	6.27782e-05	SE	26413167-26414988~26416202-26416292~26418112-26418247
SE.17060	ENSMUSG00000035776.14	Cd99l2	chrX	-	0.379	0.399	0.262	0.728	0.531	0.633	-0.284	1.35701e-06	6.27782e-05	SE	71441073-71441145~71449938-71450007~71450610-71450673
SE.19495	ENSMUSG00000025085.16	Ablim1	chr19	-	1	1	1	0.435	0.314	1	0.417	1.36693e-06	6.29761e-05	SE	57073854-57073902~57077413-57077497~57079812-57079871
MXE.558	ENSMUSG00000026950.18	Neb	chr2	-	0.062	0.058	0.08	0.03	0.033	0.025	0.037	3.02641e-06	6.34681e-05	MXE	52150536-52150629~52150966-52151059;52153682-52153775~52157290-52157383
SE.13220	ENSMUSG00000061462.18	Obscn	chr11	-	0.867	0.649	0.891	0.251	0.349	0.521	0.429	1.38814e-06	6.38196e-05	SE	59054161-59054425~59055960-59056224~59062030-59062294
SE.5713	ENSMUSG00000026950.18	Neb	chr2	-	0.782	0.803	0.689	0.839	0.932	0.871	-0.123	1.39763e-06	6.41219e-05	SE	52154569-52154662~52156354-52156447~52157290-52157383
SE.12427	ENSMUSG00000061751.16	Kalrn	chr16	-	0	0	0.093	0.229	0.13	0.144	-0.137	1.4141e-06	6.46076e-05	SE	34039878-34040009~34049829-34049922~34053559-34053664
SE.13276	ENSMUSG00000061462.18	Obscn	chr11	-	0.316	0.419	0.477	0.709	0.545	0.871	-0.304	1.41406e-06	6.46076e-05	SE	59052444-59052711~59064186-59064450~59067065-59067329
SE.19622	ENSMUSG00000063179.13	Pstk	chr7	+	1	1	1	0.33	0.17	1	0.5	1.44029e-06	6.56679e-05	SE	131383924-131384000~131384499-131384593~131392499-131392768
SE.19743	ENSMUSG00000025498.15	Irf7	chr7	-	0.622	0.552	0.712	1	1	1	-0.371	1.45148e-06	6.6041e-05	SE	141263658-141264048~141264222-141264315~141264492-141264559
SE.12072	ENSMUSG00000025949.16	Pikfyve	chr1	+	0.567	0.711	0.908	0.133	0.339	0	0.571	1.46265e-06	6.64113e-05	SE	65192144-65192294~65192533-65192566~65195655-65195774
A5SS.1019	ENSMUSG00000033060.16	Lmo7	chr14	+	0.136	0.097	0.061	0.043	0.027	0.011	0.071	4.23001e-07	6.94875e-05	A5SS	101886936-101887656~101887656-101887891~101888676-101888706
A5SS.647	ENSMUSG00000045962.16	Wnk1	chr6	-	0.338	0.284	0.282	0.139	0.099	0.155	0.17	5.42713e-07	7.12903e-05	A5SS	119929832-119929867~119932668-119932689~119932689-119932761
A5SS.887	ENSMUSG00000032503.18	Arpp21	chr9	-	1	0.696	1	0.518	0.296	0.336	0.515	5.52332e-07	7.12903e-05	A5SS	112149334-112149372~112155417-112157689~112157689-112157798
A5SS.1174	ENSMUSG00000027257.13	Pacsin3	chr2	+	0.482	0.383	0.616	0.153	0.203	0.132	0.331	5.22335e-07	7.12903e-05	A5SS	91256301-91256343~91256343-91256408~91259863-91259927
SE.4983	ENSMUSG00000025871.18	4833439L19Rik	chr13	-	0.574	0.358	0.441	0.787	0.763	0.743	-0.307	1.60483e-06	7.27171e-05	SE	54556367-54556651~54564514-54564621~54565181-54565303
A5SS.317	ENSMUSG00000021068.17	Nin	chr12	-	1	1	1	0.254	1	0.089	0.552	6.52453e-07	7.36864e-05	A5SS	70102650-70102854~70111071-70111435~70111435-70111482
A5SS.1190	ENSMUSG00000038437.11	Mllt6	chr11	+	0.727	0.749	0.789	0.434	0.581	0.441	0.27	6.28729e-07	7.36864e-05	A5SS	97672456-97672592~97672592-97672682~97673459-97674071
SE.6214	ENSMUSG00000026596.13	Abl2	chr1	+	1	1	1	0.622	1	0.484	0.298	1.63586e-06	7.39706e-05	SE	156615922-156616058~156620838-156620901~156622484-156622655
SE.18577	ENSMUSG00000038695.13	Josd2	chr7	+	1	1	1	0.936	0.92	0.825	0.106	1.66146e-06	7.49738e-05	SE	44467979-44468190~44468809-44468969~44470411-44470537
SE.2021	ENSMUSG00000022453.8	Naga	chr15	-	1	1	1	0.905	0.482	0.858	0.252	1.66762e-06	7.50976e-05	SE	82335842-82336020~82336769-82336941~82337386-82337496
MXE.1506	ENSMUSG00000051747.15	Ttn	chr2	-	0.218	0.241	0.191	0.311	0.249	0.353	-0.088	3.68497e-06	7.59411e-05	MXE	76887805-76888087~76888885-76889173;76901840-76902122~76903062-76903626
MXE.2131	ENSMUSG00000032355.16	Mlip	chr9	-	0.928	0.909	0.954	0.833	0.887	0.801	0.09	3.69014e-06	7.59411e-05	MXE	77181351-77181396~77216976-77217048;77229484-77231029~77239391-77239784
SE.4036	ENSMUSG00000020814.13	Mxra7	chr11	-	0	0.395	0	0.925	0.662	0.367	-0.52	1.70308e-06	7.65377e-05	SE	116807728-116807968~116810787-116810867~116811922-116812016
SE.38	ENSMUSG00000041476.12	Smpx	chrX	+	0.852	0.854	0.877	0.917	0.941	0.908	-0.061	1.72518e-06	7.73724e-05	SE	157720930-157721079~157751594-157751629~157752171-157752214
SE.17679	ENSMUSG00000050471.17	Fam118b	chr9	-	0.824	1	0.8	0.455	0.4	0	0.59	1.73832e-06	7.7803e-05	SE	35244613-35244706~35267036-35267111~35267722-35267777
SE.12711	ENSMUSG00000102976.6	Zc3h11a	chr1	-	0.061	0.26	0.13	0.023	0.013	0.032	0.128	1.76287e-06	7.87416e-05	SE	133647469-133647529~133651777-133651825~133653972-133654032
SE.14144	ENSMUSG00000051747.15	Ttn	chr2	-	0.123	0.168	0.122	0.312	0.155	0.327	-0.127	1.80212e-06	8.03315e-05	SE	76831787-76831874~76844204-76844279~76847387-76847471
SE.4634	ENSMUSG00000001036.17	Epn2	chr11	-	0.405	0.577	0	1	1	1	-0.673	1.80929e-06	8.04876e-05	SE	61546691-61546911~61553509-61553579~61565821-61565894
MXE.133	ENSMUSG00000024122.16	Pdpk1	chr17	-	0.058	0.144	0.222	0.403	0.378	0.422	-0.26	4.02859e-06	8.13849e-05	MXE	24098093-24098169~24100810-24100908;24107228-24107271~24110847-24111117
MXE.1705	ENSMUSG00000040998.18	Npnt	chr3	-	0	0	0	0.231	0.429	0.278	-0.313	4.02438e-06	8.13849e-05	MXE	132908342-132908462~132909895-132910015;132917460-132917553~132948046-132948147
SE.731	ENSMUSG00000024969.15	Mark2	chr19	-	0.856	1	1	0.298	0.718	0	0.613	1.83932e-06	8.16583e-05	SE	7276848-7277450~7279985-7280012~7280997-7281255
SE.4975	ENSMUSG00000025871.18	4833439L19Rik	chr13	-	0.987	0.987	0.98	0.929	0.941	0.908	0.059	1.86006e-06	8.24126e-05	SE	54559197-54559324~54561692-54561871~54565181-54565291
SE.19224	ENSMUSG00000015126.9	Tsr3	chr17	+	0.722	0.72	0.903	1	1	1	-0.218	1.89068e-06	8.36009e-05	SE	25240169-25240364~25240443-25240663~25241063-25241257
SE.16946	ENSMUSG00000020074.7	Ccar1	chr10	-	0.74	0.719	0.84	0.949	1	0.959	-0.203	1.94405e-06	8.56653e-05	SE	62763439-62763523~62764323-62764534~62765266-62765433
SE.21012	ENSMUSG00000048537.16	Phldb1	chr9	-	0.236	0.144	0.161	0.377	0.475	0.318	-0.21	1.94517e-06	8.56653e-05	SE	44699555-44699696~44700945-44701086~44703802-44703892
SE.10863	ENSMUSG00000022568.17	Scrib	chr15	-	0.446	0.306	0.653	0.824	0.946	0.946	-0.437	2.01087e-06	8.83818e-05	SE	76061133-76061223~76061738-76061801~76062669-76063047
SE.19893	ENSMUSG00000022353.10	Mtss1	chr15	-	0.217	0	0	0.357	1	0.316	-0.485	2.01768e-06	8.85039e-05	SE	58945984-58946019~58948322-58948442~58951469-58951680
SE.16632	ENSMUSG00000030556.13	Lrrc28	chr7	-	0.252	0.236	0.136	0.443	0.75	0.564	-0.378	2.03318e-06	8.90063e-05	SE	67545365-67545468~67559857-67560064~67617992-67618130
SE.17497	ENSMUSG00000030172.15	Erc1	chr6	-	0.435	0.604	0.661	0.299	0.229	0.242	0.31	2.05568e-06	8.97294e-05	SE	119824385-119825209~119825680-119825819~119847876-119848134
SE.19059	ENSMUSG00000038482.11	Tfdp1	chr8	+	0.945	0.938	0.879	0.744	0.224	0.432	0.454	2.05786e-06	8.97294e-05	SE	13339664-13339739~13357042-13357109~13365088-13365195
SE.4399	ENSMUSG00000020521.7	Rnft1	chr11	+	1	0.939	0.969	0.863	0.646	0.912	0.162	2.07108e-06	9.00427e-05	SE	86486060-86486505~86486655-86486732~86489066-86489167
SE.15241	ENSMUSG00000033526.16	Ppip5k1	chr2	-	0.146	0.111	0.352	0.525	0.473	0.721	-0.37	2.07324e-06	9.00427e-05	SE	121321654-121321792~121327644-121327770~121331557-121331648
SE.13100	ENSMUSG00000035901.14	Dennd5a	chr7	-	0.977	1	1	0.903	0.892	0.848	0.111	2.14709e-06	9.30658e-05	SE	109934692-109934802~109935481-109935553~109960073-109960470
SE.4517	ENSMUSG00000038351.14	Sgsm2	chr11	-	0	0.062	0	0.441	0.678	0.226	-0.428	2.18681e-06	9.46009e-05	SE	74859745-74859899~74863559-74863694~74865084-74865211
MXE.159	ENSMUSG00000045983.16	Eif4g1	chr16	+	0.279	0.24	0.226	0.316	0.374	0.403	-0.116	4.74516e-06	9.49895e-05	MXE	20672748-20672876~20673598-20673655;20673867-20673961~20674227-20674314
RI.817	ENSMUSG00000074578.14	Zfas1	chr2	+	0.052	0.031	0.049	0.291	0.313	0.215	-0.229	5.62516e-07	9.6091e-05	RI	167065158-167065217~167065158-167065480~167065433-167065480
SE.14538	ENSMUSG00000051747.15	Ttn	chr2	-	0.208	0.193	0.169	0.466	0.256	0.554	-0.235	2.23554e-06	9.6519e-05	SE	76894141-76894423~76898837-76899116~76903062-76903626
SE.13251	ENSMUSG00000061462.18	Obscn	chr11	-	0.084	0.099	0.109	0.279	0.183	0.564	-0.245	2.24092e-06	9.65618e-05	SE	59053573-59053837~59062030-59062294~59067065-59067329
SE.7129	ENSMUSG00000029538.14	Srsf9	chr5	+	0.178	0.36	0.228	0.063	0.132	0.039	0.177	2.28278e-06	9.81727e-05	SE	115327394-115327499~115328346-115328704~115330497-115330658
A3SS.3023	ENSMUSG00000044876.15	Zfp444	chr7	+	0.575	1	0.403	0.184	0	0	0.598	4.65448e-07	0.000101301	A3SS	6173981-6174101~6183789-6183861~6183861-6184202
SE.12199	ENSMUSG00000070808.4	Bicra	chr7	-	1	1	1	1	0.763	0.567	0.223	2.38468e-06	0.000102355	SE	15979350-15979986~15986912-15987089~15987478-15989440
SE.11102	ENSMUSG00000021079.16	Timm9	chr12	-	0.486	0.724	0.423	0.134	0.085	0.055	0.453	2.44033e-06	0.00010454	SE	71132000-71132086~71132506-71132642~71136554-71136648
SE.20894	ENSMUSG00000036833.16	Pnpla7	chr2	+	0.043	0.018	0	0.207	0.247	0.119	-0.171	2.44682e-06	0.000104613	SE	24976100-24976313~24978125-24978221~24980033-24980102
SE.9177	ENSMUSG00000087380.7	2210408F21Rik	chr6	+	0.791	0.86	0.882	0.936	1	1	-0.134	2.554e-06	0.000108984	SE	31244104-31244358~31277847-31277955~31285002-31285120
A5SS.190	ENSMUSG00000097039.8	Pvt1	chr15	+	1	1	1	0	0.709	0.493	0.599	1.04234e-06	0.000110795	A5SS	62242173-62242297~62242297-62242301~62242433-62242561
SE.3389	ENSMUSG00000097451.11	Rian	chr12	+	1	1	0.663	0.203	0.208	0.478	0.591	2.62084e-06	0.00011162	SE	109627047-109627132~109634275-109634354~109635393-109635457
SE.13230	ENSMUSG00000061462.18	Obscn	chr11	-	0.935	0.696	0.927	0.359	0.411	0.661	0.376	2.6619e-06	0.000113149	SE	59054161-59054425~59060843-59061107~59062030-59062294
SE.20564	ENSMUSG00000021366.8	Hivep1	chr13	+	0.028	0	0	0.141	0.297	0.075	-0.162	2.67461e-06	0.00011347	SE	42167561-42167663~42169240-42169309~42181431-42181910
SE.2	ENSMUSG00000035299.16	Mid1	chrX	+	1	1	1	0.857	0.94	0.626	0.192	2.71977e-06	0.000115163	SE	169966062-169966158~169976921-169977029~169981884-169982033
SE.20735	ENSMUSG00000057193.8	Slc44a2	chr9	+	0.372	0.347	0.335	0.538	0.562	0.493	-0.18	2.75534e-06	0.000116445	SE	21352466-21352551~21353000-21353128~21353681-21353851
SE.396	ENSMUSG00000025006.18	Sorbs1	chr19	-	0.163	0.076	0.022	0.421	0.251	0.5	-0.304	2.95822e-06	0.000124779	SE	40373475-40373617~40376983-40377016~40382520-40382633
MXE.1182	ENSMUSG00000009995.17	Taz	chrX	+	0.852	0.968	0.884	0.963	1	1	-0.086	6.39107e-06	0.000126785	MXE	74288450-74288513~74288661-74288714;74288928-74289019~74289104-74289182
SE.13264	ENSMUSG00000061462.18	Obscn	chr11	-	0.071	0.063	0.052	0.167	0.089	0.387	-0.152	3.01715e-06	0.000127021	SE	59053573-59053837~59062646-59062910~59067065-59067329
SE.13062	ENSMUSG00000041757.17	Plekha6	chr1	+	1	0.835	1	0.533	0.894	0.655	0.251	3.04237e-06	0.000127838	SE	133273857-133274374~133274792-133274879~133280338-133280407
SE.1754	ENSMUSG00000022677.15	Fopnl	chr16	-	0.464	0.536	0.467	0.333	0.154	0.126	0.285	3.08919e-06	0.000129557	SE	14304453-14304587~14311046-14311131~14317293-14317347
SE.21009	ENSMUSG00000048537.16	Phldb1	chr9	-	0.598	0.637	0.588	0.223	0.355	0.292	0.318	3.10441e-06	0.000129948	SE	44697925-44698220~44698826-44698871~44699346-44699449
MXE.1170	ENSMUSG00000032577.16	Mapkapk3	chr9	-	1	1	1	0.916	0.448	0.646	0.33	6.6149e-06	0.000130054	MXE	107257061-107257142~107258329-107258454;107258813-107258889~107260044-107260168
SE.6306	ENSMUSG00000020107.10	Anapc16	chr10	-	0.181	0.273	0.241	0.099	0	0.064	0.177	3.20441e-06	0.000133878	SE	59996447-59996614~60002417-60002467~60002955-60002995
SE.12407	ENSMUSG00000035642.16	Aamdc	chr7	-	0.96	0.947	0.988	0.878	0.941	0.747	0.11	3.25632e-06	0.000135789	SE	97550330-97550741~97565150-97565300~97575587-97575653
SE.7354	ENSMUSG00000028207.18	Asph	chr4	-	1	1	1	0.867	0.932	0.587	0.205	3.31682e-06	0.00013805	SE	9604515-9604629~9624359-9624401~9635900-9635969
SE.3627	ENSMUSG00000047454.12	Gphn	chr12	+	1	1	1	0.785	0.911	0.869	0.145	3.54208e-06	0.000147147	SE	78562855-78562898~78590533-78590671~78609144-78609237
SE.5015	ENSMUSG00000034354.17	Mtmr3	chr11	-	0.476	0.69	0.727	0.324	0.374	0.253	0.314	3.63537e-06	0.000150454	SE	4482751-4482939~4484670-4484697~4485362-4485451
SE.20271	ENSMUSG00000019763.11	Rmnd1	chr10	-	0.296	0.172	0.163	0.482	0.951	0.653	-0.485	3.63515e-06	0.000150454	SE	4427444-4427691~4428408-4428465~4429076-4429171
SE.21284	ENSMUSG00000032355.16	Mlip	chr9	-	1	1	1	0.829	0.776	0.41	0.328	3.65675e-06	0.000151054	SE	77181351-77181396~77190671-77190737~77229484-77230954
SE.4835	ENSMUSG00000020271.17	Fbxw11	chr11	+	0	0.192	0	0.843	0.284	1	-0.645	3.66874e-06	0.000151265	SE	32652747-32652904~32680200-32680302~32708187-32708250
SE.10769	ENSMUSG00000027695.16	Pld1	chr3	+	0.532	0.758	1	0.14	0.054	0.049	0.682	3.80047e-06	0.000155852	SE	28078203-28078417~28079188-28079302~28085785-28085914
SE.12631	ENSMUSG00000068735.14	Trp53i11	chr2	+	0	0	0	0.2	0.116	0.015	-0.11	3.78934e-06	0.000155852	SE	93187547-93187747~93189088-93189223~93196896-93196978
SE.15628	ENSMUSG00000040188.10	Scamp2	chr9	+	0.09	0	0	0.124	0.217	0.134	-0.128	3.80126e-06	0.000155852	SE	57577638-57577737~57578273-57578402~57579432-57579550
SE.14197	ENSMUSG00000051747.15	Ttn	chr2	-	0.931	0.981	1	0.858	0.671	0.922	0.154	3.85069e-06	0.000157584	SE	76848278-76848356~76848558-76848642~76850569-76850644
A3SS.1076	ENSMUSG00000003810.13	Mast2	chr4	-	0.929	0.921	0.825	0.753	0.654	0.693	0.192	8.20027e-07	0.000158067	A3SS	116368735-116368784~116368784-116368930~116371476-116371734
A3SS.2298	ENSMUSG00000072653.14	Zfp783	chr6	+	0.434	0	0	1	0.161	1	-0.576	8.3002e-07	0.000158067	A3SS	47945428-47945751~47945836-47945882~47945882-47945962
SE.17254	ENSMUSG00000009621.18	Vav2	chr2	-	0.717	0.47	0.559	0.123	0.073	0.112	0.479	3.96159e-06	0.000161822	SE	27267229-27267384~27268150-27268237~27268898-27269022
SE.13931	ENSMUSG00000051747.15	Ttn	chr2	-	0.981	0.964	0.976	0.996	0.994	0.991	-0.02	3.9997e-06	0.000163075	SE	76817788-76817863~76818735-76818816~76821115-76821184
SE.3432	ENSMUSG00000021258.10	Ccnk	chr12	+	1	0.99	0.991	0.872	0.971	0.89	0.083	4.0148e-06	0.000163388	SE	108179578-108179880~108182176-108182208~108186375-108186622
SE.19789	ENSMUSG00000087090.7	Nctc1	chr7	-	0.981	0.994	0.984	0.909	0.99	0.946	0.038	4.12534e-06	0.000167576	SE	142544608-142545383~142555033-142556170~142558404-142558596
SE.4527	ENSMUSG00000097729.2	2310015A10Rik	chr12	-	0.129	0.082	0	0.301	0.369	0.37	-0.276	4.14222e-06	0.000167951	SE	80124925-80125126~80127065-80127196~80131813-80131959
SE.17103	ENSMUSG00000025019.17	Lcor	chr19	+	1	0.711	1	0.693	0	0.551	0.489	4.15906e-06	0.000168323	SE	41545874-41546007~41555607-41555701~41581777-41586536
SE.15045	ENSMUSG00000050565.16	Tor1aip2	chr1	+	1	1	1	0.704	1	0.556	0.247	4.22546e-06	0.000170696	SE	156035771-156036091~156041074-156041134~156051293-156051623
SE.14860	ENSMUSG00000034312.15	Iqsec1	chr6	-	0.317	0.385	0.373	0.591	0.543	0.564	-0.208	4.25408e-06	0.000171537	SE	90659597-90662955~90664021-90664071~90667899-90668076
SE.14213	ENSMUSG00000051747.15	Ttn	chr2	-	0.903	0.978	1	0.78	0.548	0.898	0.218	4.28078e-06	0.000172297	SE	76848278-76848356~76850305-76850380~76850569-76850644
SE.13228	ENSMUSG00000061462.18	Obscn	chr11	-	0.067	0.057	0.069	0.161	0.091	0.377	-0.145	4.2895e-06	0.000172333	SE	59053573-59053837~59060843-59061107~59067065-59067329
SE.3387	ENSMUSG00000097451.11	Rian	chr12	+	0.707	0.591	0.743	0.225	0.178	0.185	0.484	4.32088e-06	0.000173277	SE	109627047-109627153~109634193-109634354~109635393-109635457
SE.11015	ENSMUSG00000051285.17	Pcmtd1	chr1	+	0.913	0.912	0.94	0.82	0.629	0.785	0.177	4.45355e-06	0.000178272	SE	7088919-7089216~7120193-7120615~7147636-7147739
SE.13910	ENSMUSG00000051747.15	Ttn	chr2	-	0.997	0.996	0.997	0.981	0.998	0.957	0.018	4.47605e-06	0.000178657	SE	76764633-76764954~76785101-76785401~76787026-76787326
SE.18536	ENSMUSG00000096054.3	Syne1	chr10	-	0.607	0.561	0.594	0.296	0.338	0.446	0.227	4.47943e-06	0.000178657	SE	5043610-5043753~5045265-5045334~5047530-5047858
SE.4484	ENSMUSG00000000631.20	Myo18a	chr11	+	0.903	0.902	0.876	0.938	0.991	0.958	-0.069	4.67623e-06	0.000185831	SE	77857722-77857845~77859018-77860331~77864690-77865195
SE.5098	ENSMUSG00000090841.2	Myl6	chr10	-	0.127	0.163	0	0.505	1	0.395	-0.537	4.67379e-06	0.000185831	SE	128492601-128492745~128492938-128493045~128493538-128493566
MXE.548	ENSMUSG00000026950.18	Neb	chr2	-	0.173	0.17	0.122	0.19	0.289	0.247	-0.087	9.69786e-06	0.00018898	MXE	52149589-52149697~52150536-52150629;52156354-52156447~52157290-52157383
SE.19831	ENSMUSG00000011832.16	Evi5l	chr8	+	0.957	0.929	1	0.492	0.908	0.621	0.288	4.77098e-06	0.000189255	SE	4200799-4200921~4201933-4201966~4202935-4203076
SE.19138	ENSMUSG00000057637.13	Prdm2	chr4	-	0.728	1	1	0.446	0.211	0.573	0.499	4.82164e-06	0.00019092	SE	143180876-143180991~143194660-143194734~143212614-143212705
SE.15212	ENSMUSG00000079110.12	Capn3	chr2	+	0.009	0.009	0	0.077	0.095	0.089	-0.081	4.86181e-06	0.000191475	SE	120501210-120501324~120501495-120501632~120502102-120502180
SE.19777	ENSMUSG00000061723.18	Tnnt3	chr7	+	0.728	0.817	0.699	1	1	1	-0.252	4.84496e-06	0.000191475	SE	142501828-142501842~142502739-142502757~142504047-142504065
SE.19872	ENSMUSG00000031441.15	Atp11a	chr8	+	0.015	0	0.104	0.134	0.209	0.188	-0.137	4.86095e-06	0.000191475	SE	12859313-12859479~12861639-12861724~12863758-12863862
A3SS.1983	ENSMUSG00000034101.14	Ctnnd1	chr2	-	0.894	0.867	0.833	0.963	0.972	0.989	-0.11	1.11432e-06	0.000199725	A3SS	84600780-84602900~84602900-84602903~84603648-84603752
MXE.545	ENSMUSG00000026950.18	Neb	chr2	-	0.57	0.555	0.567	0.651	0.635	0.685	-0.093	1.05544e-05	0.000203867	MXE	52149589-52149697~52150536-52150629;52150966-52151059~52151363-52151456
RI.2366	ENSMUSG00000053964.17	Lgals4	chr7	+	0.271	0.528	0.271	0.528	1	1	-0.486	1.28916e-06	0.000207984	RI	28840580-28840610~28840580-28840952~28840863-28840952
SE.9854	ENSMUSG00000026384.13	Ptpn4	chr1	-	0.649	0.658	0.822	1	0.894	1	-0.255	5.35776e-06	0.00021063	SE	119765428-119765481~119765877-119765922~119783481-119783589
SE.13949	ENSMUSG00000051747.15	Ttn	chr2	-	1	1	1	0.872	0.702	0.799	0.209	5.44583e-06	0.00021371	SE	76818735-76818816~76822450-76822564~76847387-76847471
MXE.568	ENSMUSG00000026950.18	Neb	chr2	-	0.074	0.08	0.047	0.08	0.119	0.117	-0.038	1.11779e-05	0.000214032	MXE	52150966-52151059~52151363-52151456;52156354-52156447~52157290-52157383
SE.11841	ENSMUSG00000054387.13	Mdm4	chr1	-	0.76	0.442	0.613	0	0.241	0	0.525	5.54787e-06	0.000217326	SE	133003790-133003890~133004653-133004692~133009136-133009192
MXE.1525	ENSMUSG00000051747.15	Ttn	chr2	-	0.764	0.758	0.815	0.651	0.756	0.658	0.091	1.16293e-05	0.000220757	MXE	76895141-76895429~76895532-76895811;76903062-76903626~76906253-76906532
SE.14200	ENSMUSG00000051747.15	Ttn	chr2	-	0.97	0.956	0.978	0.89	0.865	0.937	0.071	5.6468e-06	0.000220808	SE	76848558-76848642~76848816-76849071~76850569-76850644
SE.21526	ENSMUSG00000041528.15	Rnf123	chr9	-	0.941	0.979	0.928	1	0.994	0.989	-0.045	5.7521e-06	0.000224526	SE	108052213-108052308~108052444-108052587~108056036-108056121
SE.17046	ENSMUSG00000031099.16	Smarca1	chrX	-	0.489	0.366	0.827	1	1	0.727	-0.348	5.78225e-06	0.000225303	SE	47874154-47874223~47875163-47875295~47876384-47876540
SE.1184	ENSMUSG00000024006.17	Stk38	chr17	-	0.853	1	0.753	1	1	1	-0.131	5.89525e-06	0.000229299	SE	28982031-28982186~28984076-28984200~28988177-28988261
SE.18022	ENSMUSG00000069601.14	Ank3	chr10	+	0.846	0.835	0.772	0.613	0.663	0.658	0.173	5.92281e-06	0.000229964	SE	69999354-69999498~70001922-70002231~70002510-70002601
SE.7560	ENSMUSG00000045962.16	Wnk1	chr6	-	0.285	0.299	0.398	0.427	0.529	0.498	-0.157	5.9556e-06	0.000230829	SE	119952684-119952969~119953770-119953902~119956070-119956170
SE.8112	ENSMUSG00000034544.17	Rsrc1	chr3	+	1	1	1	0.841	0.735	0.816	0.203	5.96849e-06	0.000230922	SE	66994516-66994712~66996470-66996590~67082535-67082709
SE.12366	ENSMUSG00000027634.14	Ndrg3	chr2	-	0.074	0.173	0.346	0.065	0	0	0.176	5.98593e-06	0.000231189	SE	156927344-156928881~156929931-156929970~156931215-156931267
SE.4549	ENSMUSG00000040483.15	Xaf1	chr11	+	0.386	1	1	0.485	0	0.239	0.554	6.17688e-06	0.000237829	SE	72303326-72303462~72306563-72306652~72308606-72308749
SE.20706	ENSMUSG00000031972.5	Acta1	chr8	-	0.021	0.019	0.018	0.024	0.031	0.034	-0.01	6.17949e-06	0.000237829	SE	123893568-123893709~123894421-123894511~123894691-123894751
MXE.1590	ENSMUSG00000028273.15	Pdlim5	chr3	-	0.844	0.867	0.925	0.648	0.761	0.545	0.227	1.26667e-05	0.000238394	MXE	142304704-142304722~142306283-142306298;142309527-142309544~142314405-142314448
SE.8202	ENSMUSG00000004897.16	Hdgf	chr3	+	0.067	0.07	0.057	0.127	0.125	0.176	-0.078	6.38955e-06	0.000245484	SE	87913312-87913451~87913840-87913910~87914051-87914237
RI.122	ENSMUSG00000007603.9	Dus3l	chr17	+	0.479	0.652	0.648	0.213	0.335	0.19	0.347	1.62423e-06	0.00024825	RI	56768033-56768150~56768033-56768902~56768347-56768902
SE.1069	ENSMUSG00000039153.17	Runx2	chr17	-	0	0	1	0.858	1	1	-0.619	6.51776e-06	0.000249972	SE	44639664-44639826~44658518-44658692~44717191-44717296
MXE.1276	ENSMUSG00000023079.14	Gtf2ird1	chr5	-	0.833	1	1	0.714	0	0.727	0.464	1.34913e-05	0.000251762	MXE	134360237-134360275~134360953-134361146;134363181-134363374~134363901-134363979
SE.3831	ENSMUSG00000036333.11	Kidins220	chr12	+	0.882	0.957	0.909	0.627	0.747	0.735	0.213	6.63967e-06	0.000254205	SE	25038323-25038550~25040455-25040569~25051094-25051226
MXE.1209	ENSMUSG00000025997.13	Ikzf2	chr1	-	0.038	0.16	0	0.24	0.376	0.426	-0.281	1.37809e-05	0.000255005	MXE	69542226-69542370~69548598-69548736;69570492-69570660~69683209-69683314
SE.13206	ENSMUSG00000061462.18	Obscn	chr11	-	0.592	0.618	0.602	0.741	0.684	0.857	-0.157	6.76072e-06	0.000258389	SE	59052444-59052711~59053573-59053837~59067065-59067329
SE.14274	ENSMUSG00000051747.15	Ttn	chr2	-	0.802	0.817	0.871	0.94	0.903	0.872	-0.075	6.96636e-06	0.000265786	SE	76856264-76856366~76856802-76856904~76857396-76857474
SE.10076	ENSMUSG00000030527.15	Crtc3	chr7	-	1	1	1	0.953	0.789	0.742	0.172	7.06533e-06	0.000269095	SE	80609896-80609932~80616464-80616565~80618593-80618656
SE.2491	ENSMUSG00000071350.12	Setdb2	chr14	-	0.764	0.504	0.64	1	1	0.814	-0.302	7.35265e-06	0.000279553	SE	59431142-59431268~59437436-59437765~59440586-59440875
SE.21141	ENSMUSG00000036986.16	Pml	chr9	-	0.045	0.148	0.094	0.342	0.549	0.455	-0.353	7.47532e-06	0.000283726	SE	58229827-58230086~58230490-58230628~58233152-58233247
SE.13877	ENSMUSG00000032479.15	Map4	chr9	+	0.632	0.593	0.606	0.456	0.482	0.506	0.129	7.57696e-06	0.000287089	SE	110068692-110068985~110072612-110072705~110078002-110078084
SE.18420	ENSMUSG00000025728.16	Pigq	chr17	-	1	1	1	1	0.805	0.685	0.17	7.70223e-06	0.000291332	SE	25930957-25931038~25931673-25932231~25934757-25934878
SE.20570	ENSMUSG00000021481.11	Zfp346	chr13	+	0.789	1	1	0.438	0.592	0.757	0.334	7.75206e-06	0.000292713	SE	55122281-55122515~55130536-55130627~55132306-55132705
SE.13029	ENSMUSG00000028456.18	Unc13b	chr4	+	0	0	0	0.537	0.127	0.121	-0.262	7.93748e-06	0.000299201	SE	43259461-43259609~43260992-43261049~43261681-43261774
SE.4094	ENSMUSG00000018858.15	Mrpl58	chr11	+	0.942	1	1	0.896	0.884	0.898	0.088	8.06949e-06	0.000303656	SE	115406550-115406587~115409479-115409539~115410059-115410142
SE.11857	ENSMUSG00000022092.11	Ppp3cc	chr14	-	0.504	0.331	0.608	0.115	0	0.298	0.343	8.21182e-06	0.000308484	SE	70224966-70225048~70225927-70225954~70235139-70235208
SE.8138	ENSMUSG00000042642.13	Flad1	chr3	-	1	1	0.976	0.897	0.813	1	0.089	8.2317e-06	0.000308703	SE	89408421-89409166~89411157-89411380~89411745-89411869
SE.1986	ENSMUSG00000062906.12	Hdac10	chr15	-	0.569	0.248	0.569	1	1	1	-0.538	8.53887e-06	0.000319133	SE	89126377-89126437~89126629-89126706~89126868-89126995
SE.18129	ENSMUSG00000075318.13	Scn2a	chr2	+	1	1	1	0.532	0.879	0.903	0.229	8.5306e-06	0.000319133	SE	65682502-65682594~65682689-65682781~65683670-65683943
SE.11016	ENSMUSG00000051285.17	Pcmtd1	chr1	+	0.078	0.032	0	0.1	0.116	0.121	-0.076	8.5888e-06	0.000319911	SE	7147636-7147739~7155079-7155271~7160891-7160902
SE.13277	ENSMUSG00000061462.18	Obscn	chr11	-	0.299	0.366	0.412	0.612	0.487	0.813	-0.278	8.58477e-06	0.000319911	SE	59053573-59053837~59064186-59064450~59067065-59067329
MXE.1204	ENSMUSG00000040774.15	Cept1	chr3	-	0.462	0.704	0.429	0.182	0.25	0	0.388	1.77687e-05	0.000326056	MXE	106505720-106505852~106512802-106512887;106520008-106520093~106531136-106531278
A3SS.1728	ENSMUSG00000022223.9	Sdr39u1	chr14	-	0.052	0.091	0.135	0.25	0.283	0.492	-0.249	1.97753e-06	0.000334751	A3SS	55898242-55898386~55898386-55898477~55899183-55899305
SE.18270	ENSMUSG00000054808.15	Actn4	chr7	-	0.755	0.753	0.945	0.479	0.529	0.427	0.339	9.02624e-06	0.000335069	SE	28909902-28909988~28911489-28911575~28912239-28912321
SE.19066	ENSMUSG00000030560.17	Ctsc	chr7	+	0.168	0.134	0.154	0.037	0.015	0.068	0.112	9.01485e-06	0.000335069	SE	88281386-88281532~88286893-88286978~88297082-88297249
A5SS.376	ENSMUSG00000020882.17	Cacnb1	chr11	-	0.034	0.043	0.024	0.061	0.068	0.057	-0.028	3.37299e-06	0.000338611	A5SS	98009857-98009916~98010003-98010295~98010295-98010376
SE.13837	ENSMUSG00000017718.15	Afmid	chr11	+	0.597	1	1	0.488	0.175	0.342	0.531	9.25699e-06	0.000343055	SE	117832527-117832576~117834766-117834852~117834945-117835018
SE.1755	ENSMUSG00000022677.15	Fopnl	chr16	-	0.438	0.451	0.418	0.253	0.214	0.226	0.205	9.2833e-06	0.000343451	SE	14304453-14304587~14313815-14314013~14317293-14317347
SE.13950	ENSMUSG00000051747.15	Ttn	chr2	-	1	1	1	0.722	0.888	0.787	0.201	9.69305e-06	0.000358007	SE	76818735-76818816~76822450-76822564~76857903-76857987
SE.1016	ENSMUSG00000024212.9	Mllt1	chr17	-	0.776	0.873	0.792	0.362	0.521	0.583	0.325	9.75615e-06	0.000359733	SE	56899768-56900296~56902562-56902688~56905711-56905855
A5SS.734	ENSMUSG00000026110.15	Mgat4a	chr1	-	0.958	1	1	0.805	0.786	0.753	0.205	3.7836e-06	0.00035984	A5SS	37495872-37496013~37498572-37498599~37498599-37498740
SE.5743	ENSMUSG00000026950.18	Neb	chr2	-	0.015	0.012	0.025	0.006	0.005	0.009	0.011	9.85782e-06	0.000362873	SE	52185270-52185375~52186011-52186116~52187410-52187515
SE.9817	ENSMUSG00000019487.11	Trip10	chr17	+	0.969	0.942	0.89	0.984	0.985	0.976	-0.048	9.92019e-06	0.000364559	SE	57250703-57250857~57250954-57251011~57253261-57253402
SE.13227	ENSMUSG00000061462.18	Obscn	chr11	-	0.278	0.181	0.205	0.536	0.354	0.702	-0.309	1.00009e-05	0.000366911	SE	59053573-59053837~59060843-59061107~59064186-59064450
SE.18575	ENSMUSG00000038695.13	Josd2	chr7	+	1	1	1	0.965	0.948	0.874	0.071	1.02348e-05	0.000374867	SE	44468021-44468190~44468806-44468969~44470411-44470468
RI.1006	ENSMUSG00000028689.14	Ccdc163	chr4	+	1	1	1	0.589	1	0.12	0.43	2.59703e-06	0.000377089	RI	116709239-116709273~116709239-116709619~116709437-116709619
MXE.1192	ENSMUSG00000026159.13	Agfg1	chr1	+	0.724	0.736	0.649	0.884	0.863	0.865	-0.168	2.09236e-05	0.000380776	MXE	82875287-82875450~82876170-82876324;82880007-82880127~82880746-82880818
SE.7463	ENSMUSG00000030306.14	Tmtc1	chr6	-	0.964	0.899	0.905	0.967	1	1	-0.066	1.05395e-05	0.000385385	SE	148284856-148284970~148294514-148294682~148305997-148306119
SE.12616	ENSMUSG00000028957.12	Per3	chr4	-	0.716	0.749	0.783	0.974	0.875	0.955	-0.185	1.06958e-05	0.00039045	SE	151028748-151028905~151029135-151029242~151031912-151031991
RI.571	ENSMUSG00000005354.16	Txn2	chr15	-	0.933	0.925	0.956	0.982	0.968	0.99	-0.042	2.88235e-06	0.000396962	RI	77915046-77915236~77915046-77915857~77915704-77915857
RI.748	ENSMUSG00000003068.17	Stk11	chr10	+	0.044	0.03	0.032	0.082	0.055	0.138	-0.056	3.00729e-06	0.000396962	RI	80126032-80126165~80126032-80126369~80126232-80126369
SE.2638	ENSMUSG00000021884.18	Hacl1	chr14	-	1	1	1	0.694	0.464	1	0.281	1.10636e-05	0.000402986	SE	31632895-31632968~31634198-31634279~31635743-31635784
SE.16977	ENSMUSG00000030852.18	Tacc2	chr7	+	0.928	0.962	0.969	0.87	0.908	0.849	0.077	1.10759e-05	0.000402986	SE	130645928-130646430~130663015-130663141~130674601-130674739
A5SS.1188	ENSMUSG00000022948.16	Setd4	chr16	-	0.494	1	1	1	0.061	0	0.478	4.76922e-06	0.00041038	A5SS	93589910-93590085~93590255-93590873~93590873-93591303
A5SS.1749	ENSMUSG00000032495.8	Lrrc2	chr9	+	0.013	0	0.028	0.056	0.262	0.059	-0.112	4.75079e-06	0.00041038	A5SS	110957799-110957946~110957946-110957956~110960801-110961009
SE.10928	ENSMUSG00000057335.11	Cep170	chr1	-	1	0.844	1	0.855	0.712	0.489	0.263	1.13251e-05	0.000411374	SE	176761350-176761500~176769232-176769526~176769712-176769870
A3SS.644	ENSMUSG00000038178.16	Slc43a2	chr11	+	0	0	0	0.092	0.071	0.116	-0.093	2.73235e-06	0.000415487	A3SS	75545753-75545830~75560820-75560898~75560898-75560991
A3SS.1074	ENSMUSG00000029822.15	Osbpl3	chr6	-	1	1	0.863	0.76	0.622	0.731	0.25	2.73253e-06	0.000415487	A3SS	50336214-50336329~50336329-50336345~50344873-50345030
A3SS.2870	ENSMUSG00000061878.16	Sphk1	chr11	+	1	1	1	0	1	0.303	0.566	2.86355e-06	0.000415487	A3SS	116533969-116534173~116534848-116534851~116534851-116535001
SE.13248	ENSMUSG00000061462.18	Obscn	chr11	-	0.106	0.14	0.158	0.384	0.234	0.673	-0.296	1.14814e-05	0.000416361	SE	59052444-59052711~59062030-59062294~59067065-59067329
MXE.868	ENSMUSG00000031865.16	Dctn1	chr6	+	0.496	0.396	0.663	0.058	0	0.045	0.484	2.32301e-05	0.000419285	MXE	83183298-83183333~83183935-83183956;83186427-83186445~83187763-83187784
SE.5151	ENSMUSG00000036916.13	Zfp280c	chrX	-	1	1	1	0.299	0	0.561	0.713	1.15848e-05	0.000419418	SE	48591672-48591761~48593513-48593598~48594363-48594391
SE.13773	ENSMUSG00000072591.10	Fzd10os	chr5	-	1	1	1	0.708	0.816	0.891	0.195	1.16614e-05	0.000420805	SE	128585271-128585406~128594207-128594910~128600536-128600693
SE.16240	ENSMUSG00000060261.15	Gtf2i	chr5	-	0.952	0.952	0.959	0.876	0.842	0.784	0.12	1.16538e-05	0.000420805	SE	134266542-134266656~134274538-134274595~134279436-134279514
SE.11581	ENSMUSG00000026153.15	Fam135a	chr1	-	0.903	0.901	0.711	1	1	1	-0.162	1.17982e-05	0.000424455	SE	24028199-24029940~24030741-24030896~24032662-24032736
SE.21879	ENSMUSG00000012819.15	Cdh23	chr10	-	0.457	0.628	0.824	1	1	0.835	-0.309	1.18012e-05	0.000424455	SE	60421045-60421158~60426607-60426724~60428308-60428381
SE.21716	ENSMUSG00000029804.17	Herc3	chr6	+	1	0.84	1	0.476	0.863	0.634	0.289	1.18298e-05	0.000424789	SE	58831464-58831642~58832401-58832536~58843603-58843714
SE.5245	ENSMUSG00000022973.18	Synj1	chr16	-	0.147	0	0	0.166	1	0.463	-0.494	1.19374e-05	0.000427955	SE	90936100-90939034~90940472-90940496~90944354-90944575
SE.1987	ENSMUSG00000062906.12	Hdac10	chr15	-	0.735	0.51	0.316	1	1	1	-0.48	1.20681e-05	0.000431936	SE	89126377-89126437~89126640-89126706~89126868-89126995
MXE.1339	ENSMUSG00000061462.18	Obscn	chr11	-	0.353	0.425	0.5	0.264	0.266	0.215	0.178	2.46217e-05	0.000437234	MXE	59054773-59055037~59055376-59055640;59055960-59056224~59064186-59064450
MXE.1347	ENSMUSG00000061462.18	Obscn	chr11	-	0.658	0.641	0.664	0.758	0.785	0.761	-0.114	2.45771e-05	0.000437234	MXE	59060843-59061107~59061423-59061687;59062030-59062294~59062646-59062910
MXE.697	ENSMUSG00000028649.21	Macf1	chr4	-	0.332	0.317	0.268	0.125	0.119	0.1	0.191	2.48339e-05	0.000437474	MXE	123513834-123514001~123536201-123536294;123539795-123539873~123544741-123544831
SE.13774	ENSMUSG00000072591.10	Fzd10os	chr5	-	1	1	1	0.726	0.826	0.898	0.183	1.23234e-05	0.000440151	SE	128585271-128585406~128594207-128595764~128600536-128600687
SE.14191	ENSMUSG00000051747.15	Ttn	chr2	-	0.267	0.354	0.253	0.49	0.371	0.573	-0.187	1.23377e-05	0.000440151	SE	76847724-76847808~76848278-76848356~76850569-76850644
RI.769	ENSMUSG00000034248.7	Slc25a37	chr14	-	0.681	0.778	0.769	1	0.87	0.954	-0.199	3.48858e-06	0.000440472	RI	69247580-69247637~69247580-69249622~69248882-69249622
SE.3281	ENSMUSG00000023805.17	Synj2	chr17	+	1	1	1	0.946	0.939	0.877	0.079	1.25409e-05	0.000446677	SE	6028418-6028586~6029699-6029834~6032696-6032809
A3SS.2581	ENSMUSG00000025326.12	Ube3a	chr7	+	0.958	0.711	0.873	0.984	0.955	1	-0.132	3.23596e-06	0.000448181	A3SS	59247172-59247217~59271946-59272142~59272142-59272236
SE.4854	ENSMUSG00000020300.14	Cpeb4	chr11	+	0.669	0.66	0.705	0.543	0.52	0.463	0.169	1.28515e-05	0.000456344	SE	31889857-31889939~31908824-31908875~31920408-31920582
SE.19945	ENSMUSG00000031543.18	Ank1	chr8	+	1	1	0.969	0.952	0.951	0.897	0.056	1.28539e-05	0.000456344	SE	23141163-23141304~23141595-23141720~23148280-23148369
SE.13990	ENSMUSG00000051747.15	Ttn	chr2	-	1	1	1	0.308	0	0.857	0.612	1.29178e-05	0.000457875	SE	76826994-76827078~76827691-76827766~76840232-76840313
SE.19158	ENSMUSG00000047767.17	Atg16l2	chr7	-	1	1	0.886	0.628	0.738	0.484	0.345	1.30678e-05	0.000462443	SE	101293875-101293984~101294858-101294921~101296120-101296234
SE.9473	ENSMUSG00000020900.15	Myh10	chr11	+	0	0	0	0.064	0.143	0.092	-0.1	1.31834e-05	0.000465785	SE	68745316-68745419~68745934-68745964~68751941-68752034
SE.20129	ENSMUSG00000025404.15	R3hdm2	chr10	+	0.764	0.704	0.796	0.566	0.628	0.579	0.164	1.32277e-05	0.0004666	SE	127464981-127465013~127465130-127465184~127471767-127472000
SE.11909	ENSMUSG00000009995.17	Taz	chrX	+	0.165	0.033	0.119	0.04	0	0.013	0.088	1.35095e-05	0.000475777	SE	74288661-74288714~74288928-74289019~74289104-74289182
RI.132	ENSMUSG00000023952.13	Gtpbp2	chr17	+	0.093	0.037	0.037	0.126	0.169	0.114	-0.081	4.02455e-06	0.000486971	RI	46165777-46165997~46165777-46166446~46166310-46166446
RI.986	ENSMUSG00000028453.10	Fancg	chr4	-	0.028	0.338	1	0.561	1	1	-0.398	4.20822e-06	0.000488827	RI	43003226-43003344~43003226-43003932~43003782-43003932
SE.5677	ENSMUSG00000026950.18	Neb	chr2	-	0.959	1	1	0.928	0.893	0.566	0.191	1.39146e-05	0.000489258	SE	52150966-52151059~52153682-52153775~52157290-52157383
SE.18503	ENSMUSG00000022607.18	Ptk2	chr15	-	0.39	0.542	1	1	1	1	-0.356	1.45233e-05	0.000509845	SE	73391758-73391880~73392343-73392447~73394647-73394744
SE.14108	ENSMUSG00000051747.15	Ttn	chr2	-	0.313	0.146	0	0.557	0.827	0.804	-0.576	1.4613e-05	0.000512178	SE	76822450-76822564~76841767-76841836~76847387-76847471
A5SS.526	ENSMUSG00000024845.17	Tmem134	chr19	+	0.825	0.787	0.849	0.961	0.935	0.981	-0.139	6.24686e-06	0.000513094	A5SS	4127549-4127639~4127639-4127836~4131228-4131282
MXE.341	ENSMUSG00000097451.11	Rian	chr12	+	0.183	0	0.183	0.513	0.414	0.505	-0.355	2.95979e-05	0.000517258	MXE	109637838-109637926~109640266-109640328;109642564-109642652~109643413-109643461
A3SS.1252	ENSMUSG00000018411.17	Mapt	chr11	+	1	0.91	0.966	0.504	0.544	0.932	0.299	3.91261e-06	0.000518336	A3SS	104302360-104302410~104305211-104305312~104305312-104305409
SE.13678	ENSMUSG00000057897.14	Camk2b	chr11	-	0.086	0.082	0.212	0.009	0.027	0.02	0.108	1.49398e-05	0.000522798	SE	5972812-5972888~5977811-5977940~5979672-5979721
SE.3397	ENSMUSG00000097451.11	Rian	chr12	+	1	1	1	0.859	0.852	0.859	0.143	1.5157e-05	0.000528715	SE	109639280-109640328~109642564-109642652~109643413-109643461
SE.15330	ENSMUSG00000027406.13	Idh3b	chr2	-	0.012	0.015	0.005	0.028	0.016	0.028	-0.013	1.51508e-05	0.000528715	SE	130279312-130279437~130279555-130279726~130280262-130280323
SE.7644	ENSMUSG00000030035.14	Wbp1	chr6	-	0.771	0.735	0.772	0.943	0.918	1	-0.194	1.52745e-05	0.000531127	SE	83120184-83120287~83120771-83120876~83121202-83121406
SE.14405	ENSMUSG00000051747.15	Ttn	chr2	-	0.989	0.982	0.979	0.996	0.991	0.998	-0.012	1.52707e-05	0.000531127	SE	76887805-76888087~76888885-76889173~76903062-76903626
SE.18607	ENSMUSG00000039126.10	Prune2	chr19	+	0	0.237	0.117	0.469	0.721	0.613	-0.483	1.5305e-05	0.000531348	SE	17211677-17211713~17212291-17212330~17216325-17216373
RI.985	ENSMUSG00000028455.15	Stoml2	chr4	-	0.108	0.009	0.057	0.018	0.006	0.01	0.047	4.96135e-06	0.000554145	RI	43028937-43029066~43028937-43029358~43029278-43029358
SE.11113	ENSMUSG00000040648.14	Ppip5k2	chr1	-	0.044	0	0.134	0.224	0.618	0.284	-0.316	1.60106e-05	0.000554967	SE	97719833-97719906~97721105-97721279~97723669-97723834
SE.5678	ENSMUSG00000026950.18	Neb	chr2	-	0.979	0.79	1	0.607	0.712	0.585	0.288	1.6587e-05	0.000574042	SE	52150966-52151059~52153682-52153775~52157831-52157912
SE.9058	ENSMUSG00000026927.17	Entr1	chr2	-	0	0.143	0	0.125	0.25	0.4	-0.211	1.70179e-05	0.000588027	SE	26388491-26388560~26388915-26389065~26389148-26389291
SE.12106	ENSMUSG00000036707.16	Cab39	chr1	+	0.077	0.101	0.108	0.196	0.287	0.186	-0.128	1.71212e-05	0.000590668	SE	85793540-85793821~85795356-85795473~85818356-85818513
SE.2544	ENSMUSG00000022884.16	Eif4a2	chr16	+	0.979	0.989	0.99	0.957	0.964	0.944	0.031	1.72612e-05	0.000594564	SE	23108718-23108851~23109119-23109259~23109984-23110153
SE.8675	ENSMUSG00000036782.13	Klhl13	chrX	-	0	0	0.217	0.246	0.41	0.229	-0.223	1.74062e-05	0.000598621	SE	23261434-23261573~23294214-23294280~23315129-23315201
A3SS.1546	ENSMUSG00000002265.17	Peg3	chr7	-	0.404	0.543	0.156	0.078	0.079	0.062	0.295	4.73882e-06	0.000601633	A3SS	6718425-6718556~6718556-6718848~6726489-6726574
SE.18592	ENSMUSG00000030739.18	Myh14	chr7	-	0.056	0.077	0.201	0.029	0	0.032	0.091	1.75285e-05	0.000601886	SE	44655591-44655684~44657416-44657440~44657934-44658037
SE.3918	ENSMUSG00000037669.15	Ldah	chr12	+	0.69	0.818	0.784	1	1	0.908	-0.205	1.78279e-05	0.000610755	SE	8227219-8227363~8238442-8238615~8268363-8268598
SE.13829	ENSMUSG00000029720.9	Gm20605	chr5	+	0.919	0.711	0.859	1	0.951	1	-0.154	1.78424e-05	0.000610755	SE	137638438-137638542~137638654-137638738~137639121-137639198
SE.15898	ENSMUSG00000039782.15	Cpeb2	chr5	+	0.564	1	0.463	1	1	0.898	-0.29	1.83083e-05	0.000625728	SE	43261733-43261784~43268868-43268892~43277430-43277601
SE.13511	ENSMUSG00000013539.14	Tango2	chr16	-	0.184	0.106	0.181	0	0.056	0	0.138	1.84756e-05	0.000630465	SE	18316645-18316734~18319743-18319787~18324356-18324450
RI.1614	ENSMUSG00000064289.15	Tank	chr2	+	0.101	0.033	0.01	0.161	0.269	0.104	-0.13	6.32673e-06	0.000632259	RI	61643714-61643785~61643714-61644422~61644306-61644422
RI.2613	ENSMUSG00000018796.13	Acsl1	chr8	+	0.012	0.01	0.012	0.015	0.023	0.029	-0.011	6.45558e-06	0.000632259	RI	46511359-46511461~46511359-46513390~46513290-46513390
RI.2652	ENSMUSG00000021901.10	Bap1	chr14	+	0.733	0.88	0.91	1	1	0.964	-0.147	6.72381e-06	0.000632259	RI	31256660-31256791~31256660-31257767~31257625-31257767
RI.2744	ENSMUSG00000027752.15	Exosc8	chr3	-	0.418	0.402	1	1	1	1	-0.393	6.74932e-06	0.000632259	RI	54734102-54734166~54734102-54734332~54734295-54734332
RI.2806	ENSMUSG00000027438.14	Napb	chr2	-	0.814	1	1	0.344	0.447	0.836	0.396	6.72512e-06	0.000632259	RI	148707158-148707205~148707158-148709433~148709316-148709433
SE.19060	ENSMUSG00000038482.11	Tfdp1	chr8	+	0.135	0.331	0	0	0.051	0	0.138	1.86144e-05	0.000634218	SE	13369458-13369580~13370168-13370274~13370480-13370646
MXE.1782	ENSMUSG00000021614.16	Vcan	chr13	-	0.384	0.325	0.306	0.246	0.285	0.195	0.096	3.69405e-05	0.000640495	MXE	89685078-89685192~89688284-89693501;89702917-89705797~89712204-89712498
SE.7347	ENSMUSG00000027601.13	Mtfr1	chr3	+	0.076	0.124	0.088	0	0	0	0.096	1.9003e-05	0.000646454	SE	19206451-19206550~19208490-19208527~19211467-19211583
SE.12793	ENSMUSG00000023079.14	Gtf2ird1	chr5	-	0.493	0.394	0.619	0.178	0	0.098	0.41	1.91584e-05	0.000650733	SE	134363901-134363979~134366835-134366916~134376106-134376135
RI.1822	ENSMUSG00000057897.14	Camk2b	chr11	-	0.038	0.03	0.014	0.063	0.077	0.088	-0.049	7.19e-06	0.000652493	RI	5972631-5972726~5972631-5972888~5972812-5972888
RI.2237	ENSMUSG00000040669.14	Phc1	chr6	-	0.042	0.129	0.151	0.052	0.013	0	0.086	7.47776e-06	0.000658043	RI	122321871-122322083~122321871-122322472~122322324-122322472
MXE.1067	ENSMUSG00000051586.17	Mical3	chr6	-	1	0.706	0.545	0.266	0.301	0.221	0.488	3.84666e-05	0.000661746	MXE	120962754-120962865~120969354-120969492;120971750-120971840~120973402-120973647
SE.9338	ENSMUSG00000085566.1	A730017L22Rik	chr2	-	0.244	0.28	0.28	0	0	0.039	0.255	1.9591e-05	0.0006644	SE	130879698-130882330~130883828-130883987~130906210-130906356
SE.9153	ENSMUSG00000028789.16	Azin2	chr4	-	0.698	1	1	0.134	0.581	0.698	0.428	2.00524e-05	0.000679001	SE	128950599-128950772~128959783-128959957~128962083-128962201
SE.3124	ENSMUSG00000021375.11	Kif13a	chr13	-	0.153	0	0.37	0.018	0.009	0.012	0.161	2.00967e-05	0.000679453	SE	46752080-46752872~46760662-46760767~46761272-46761424
SE.17725	ENSMUSG00000015766.14	Eps8	chr6	-	0.8	1	0.727	0.571	0.182	0.2	0.525	2.01993e-05	0.000681875	SE	137537617-137537694~137539321-137539396~137591417-137591492
SE.616	ENSMUSG00000024563.16	Smad2	chr18	+	0.847	0.955	0.843	0.971	1	1	-0.109	2.06579e-05	0.000696285	SE	76299782-76299995~76302078-76302216~76302382-76302527
A3SS.2014	ENSMUSG00000005506.16	Celf1	chr2	+	0.906	0.971	0.95	0.786	0.871	0.85	0.107	5.87535e-06	0.000716087	A3SS	91004700-91004862~91006619-91006631~91006631-91006695
SE.2085	ENSMUSG00000033565.18	Rbfox2	chr15	-	0.817	0.787	0.863	0.612	0.412	0.536	0.302	2.15048e-05	0.00072372	SE	77086066-77086155~77094450-77094490~77097939-77098072
SE.3388	ENSMUSG00000097451.11	Rian	chr12	+	0.647	0.647	0.604	0.111	0.044	0.131	0.537	2.15778e-05	0.000725066	SE	109627047-109627153~109634258-109634354~109635393-109635457
A5SS.924	ENSMUSG00000057335.11	Cep170	chr1	-	1	0.877	1	0.854	0.765	0.388	0.29	9.77595e-06	0.000731882	A5SS	176761350-176761500~176769232-176769712~176769712-176769870
A5SS.1000	ENSMUSG00000032577.16	Mapkapk3	chr9	-	1	1	1	0.686	0.709	0.66	0.315	9.96216e-06	0.000731882	A5SS	107261877-107261957~107262422-107263624~107263624-107263764
A5SS.1661	ENSMUSG00000023994.13	Nfya	chr17	-	1	0.887	1	0.62	0.269	0.873	0.375	1.01256e-05	0.000731882	A5SS	48395649-48395796~48398981-48398984~48398984-48399065
RI.1596	ENSMUSG00000008690.15	Ncaph2	chr15	+	0	0.026	0.089	0.203	0.274	0.051	-0.138	8.61815e-06	0.000736092	RI	89370394-89370488~89370394-89370675~89370603-89370675
SE.20955	ENSMUSG00000050379.15	Septin6	chrX	-	1	1	0	0.606	0	0	0.465	2.21613e-05	0.000743538	SE	36913445-36916545~36920368-36920413~36922839-36923030
SE.4482	ENSMUSG00000000631.20	Myo18a	chr11	+	0	0.038	0	0.156	0.113	0.156	-0.129	2.28379e-05	0.00076507	SE	77777292-77778314~77815855-77815999~77817618-77817706
SE.3971	ENSMUSG00000025144.17	Cenpx	chr11	-	1	1	0.839	0.77	0.547	0.565	0.319	2.30625e-05	0.000771418	SE	120711702-120711756~120711843-120711895~120713692-120713738
SE.19769	ENSMUSG00000039219.18	Arid4b	chr13	+	0.052	0.271	0.331	1	1	0.536	-0.627	2.32989e-05	0.000778141	SE	14164766-14164942~14169918-14170071~14181219-14181304
SE.374	ENSMUSG00000025006.18	Sorbs1	chr19	-	0.985	0.985	0.976	0.923	0.951	0.94	0.044	2.37773e-05	0.000792913	SE	40300242-40300302~40309580-40310333~40311668-40311863
SE.21773	ENSMUSG00000025786.17	Zdhhc3	chr9	-	0.104	0.11	0.115	0.035	0.014	0.012	0.089	2.40672e-05	0.000801366	SE	123089031-123089156~123098922-123098974~123100262-123100592
SE.12764	ENSMUSG00000021427.10	Ssr1	chr13	-	0.108	0.202	0.132	0.037	0	0	0.135	2.42541e-05	0.000803935	SE	37979742-37979806~37983094-37983109~37983392-37983486
SE.15490	ENSMUSG00000074698.10	Csnk2a1	chr2	+	0.958	1	1	0.741	0.963	0.859	0.132	2.42203e-05	0.000803935	SE	152226838-152226991~152250401-152250611~152254209-152254321
SE.17126	ENSMUSG00000068329.12	Htra2	chr6	-	0.854	1	1	0.626	0.626	0.626	0.325	2.42165e-05	0.000803935	SE	83052472-83052542~83052697-83052726~83053037-83053070
SE.18301	ENSMUSG00000030592.18	Ryr1	chr7	-	0.003	0.004	0.002	0.018	0.011	0.028	-0.016	2.43381e-05	0.000805504	SE	29116112-29116187~29117207-29117228~29117333-29117438
RI.384	ENSMUSG00000040472.15	Rabggta	chr14	-	0	0.199	0	1	0.184	1	-0.662	9.7143e-06	0.000806009	RI	55721843-55721900~55721843-55722176~55722052-55722176
MXE.1029	ENSMUSG00000033852.16	Gm28042	chr2	+	0.543	0.543	0.543	1	1	0.704	-0.358	4.80445e-05	0.000820109	MXE	120030288-120030542~120030815-120030872;120031306-120031402~120031501-120031651
SE.819	ENSMUSG00000037013.17	Ss18	chr18	-	1	1	0.832	0.638	0.847	0.755	0.197	2.51931e-05	0.000832547	SE	14636495-14636618~14637391-14637484~14640955-14641123
A3SS.2105	ENSMUSG00000002107.18	Celf2	chr2	-	0.909	1	1	0.852	0.506	0.668	0.294	7.13681e-06	0.00083638	A3SS	6604023-6604182~6604182-6607961~6615687-6615822
SE.17917	ENSMUSG00000027522.15	Stx16	chr2	+	0.964	0.951	0.934	0.65	0.851	0.797	0.184	2.53941e-05	0.00083793	SE	174091481-174091622~174092401-174092567~174093433-174093525
SE.10104	ENSMUSG00000028559.17	Osbpl9	chr4	-	0.86	0.578	0.631	1	0.86	1	-0.264	2.56956e-05	0.000846607	SE	109102496-109102592~109107880-109107949~109117894-109118036
SE.3289	ENSMUSG00000024236.18	Svil	chr18	+	1	1	1	0.788	0.912	0.945	0.118	2.6124e-05	0.000859434	SE	5048884-5049494~5054017-5054098~5057274-5057439
SE.19770	ENSMUSG00000039219.18	Arid4b	chr13	+	0.108	0.477	0	1	1	0.728	-0.714	2.63247e-05	0.000864742	SE	14164766-14164942~14169918-14170179~14181219-14181304
A3SS.2841	ENSMUSG00000031907.9	Zfp90	chr8	+	0.381	0	0	0.435	1	0.551	-0.535	7.77459e-06	0.000877377	A3SS	106419070-106419197~106419420-106419514~106419514-106419610
SE.9621	ENSMUSG00000006476.19	Nsmf	chr2	+	0.872	1	1	0.649	0.847	0.481	0.298	2.77186e-05	0.00090917	SE	25057146-25057176~25058228-25058321~25059020-25059073
SE.6351	ENSMUSG00000026867.18	Gapvd1	chr2	-	0.458	0.48	0.547	0.255	0.178	0.109	0.314	2.79106e-05	0.000912743	SE	34720567-34720728~34722937-34723018~34725042-34725232
SE.21111	ENSMUSG00000022255.16	Mtdh	chr15	+	0.211	0.207	0.221	0.335	0.402	0.336	-0.145	2.78889e-05	0.000912743	SE	34117879-34118110~34121422-34121512~34123667-34123766
SE.19365	ENSMUSG00000038187.14	Btbd10	chr7	-	0.511	1	0.677	0.189	0.149	0.104	0.582	2.80619e-05	0.000916326	SE	113335321-113335518~113364904-113364969~113368871-113368958
A3SS.749	ENSMUSG00000019948.4	Actr6	chr10	-	0.319	0.273	0.103	0	0	0	0.232	8.73872e-06	0.000918168	A3SS	89725767-89725903~89725903-89725953~89726636-89726760
A3SS.1161	ENSMUSG00000055723.6	Rras2	chr7	-	0.278	0.117	0.281	0.068	0.068	0.042	0.166	8.54183e-06	0.000918168	A3SS	114050300-114050419~114050419-114051698~114058539-114058648
SE.294	ENSMUSG00000035173.14	Ccdc186	chr19	-	1	1	1	0.265	0.351	0.619	0.588	2.87364e-05	0.000935657	SE	56809192-56809321~56810238-56810365~56821987-56822190
SE.20270	ENSMUSG00000019763.11	Rmnd1	chr10	-	0.434	0.53	0.318	0.716	0.95	0.708	-0.364	2.8739e-05	0.000935657	SE	4427522-4427691~4428368-4428465~4429076-4429171
SE.13816	ENSMUSG00000035064.17	Eef2k	chr7	+	1	0.97	0.945	0.911	0.848	0.777	0.126	2.90254e-05	0.000943583	SE	120889688-120889751~120891864-120892053~120895183-120895308
SE.9809	ENSMUSG00000000827.18	Tpd52l2	chr2	+	0.66	0.682	0.653	0.433	0.505	0.422	0.212	2.9795e-05	0.00096717	SE	181501904-181502053~181502875-181502935~181508165-181508267
SE.5845	ENSMUSG00000029152.13	Ociad1	chr5	+	0.836	0.935	0.909	0.953	0.982	0.977	-0.077	3.01162e-05	0.000976155	SE	73306577-73306798~73310273-73310426~73313442-73313941
SE.711	ENSMUSG00000024505.16	Dtwd2	chr18	-	0.814	0.881	1	0.467	0.396	0.546	0.429	3.02359e-05	0.000978591	SE	49700258-49700387~49723621-49723814~49724112-49724207
SE.4254	ENSMUSG00000014195.16	Dnajc7	chr11	-	0.053	0.06	0.116	0.022	0.011	0.011	0.062	3.08909e-05	0.000998322	SE	100584981-100585055~100589674-100589778~100589897-100589989
MXE.2124	ENSMUSG00000032355.16	Mlip	chr9	-	0.336	0.476	0.31	0.7	0.58	0.851	-0.336	5.9289e-05	0.00100426	MXE	77181351-77181396~77190671-77190737;77216976-77217048~77239391-77239784
A3SS.392	ENSMUSG00000046169.10	Adamts6	chr13	+	0.744	1	1	0.592	0	0.367	0.595	1.00411e-05	0.0010054	A3SS	104312714-104312926~104313630-104313635~104313635-104313719
A3SS.1840	ENSMUSG00000023079.14	Gtf2ird1	chr5	-	1	1	1	0.467	0	0	0.844	1.05588e-05	0.0010054	A3SS	134366835-134366895~134366895-134366916~134376106-134376135
A3SS.2839	ENSMUSG00000031903.7	Pla2g15	chr8	+	0.621	0.29	1	0.966	1	1	-0.352	1.03297e-05	0.0010054	A3SS	106160580-106160679~106161083-106161208~106161208-106161308
SE.13690	ENSMUSG00000026586.16	Prrx1	chr1	-	0.413	0.449	0.444	0.603	0.555	0.578	-0.143	3.13939e-05	0.00101309	SE	163245118-163248396~163253976-163254048~163257760-163257942
SE.854	ENSMUSG00000024293.16	Esco1	chr18	-	0.673	0.702	0.75	1	0.9	1	-0.258	3.26404e-05	0.00105177	SE	10588438-10588550~10595675-10595875~10596338-10596441
A5SS.1585	ENSMUSG00000074802.11	Gas2l3	chr10	-	1	1	0.495	1	0	0.098	0.466	1.5207e-05	0.00105689	A5SS	89433764-89433812~89434289-89434292~89434292-89434361
SE.19656	ENSMUSG00000036473.16	Tbc1d24	chr17	-	0.309	0.373	0.229	0	0	0	0.304	3.31306e-05	0.001066	SE	24183693-24183852~24184380-24184398~24185203-24186201
SE.17457	ENSMUSG00000025702.15	Marchf8	chr6	+	0.045	0.051	0.07	0.113	0.155	0.143	-0.082	3.32541e-05	0.00106841	SE	116401036-116401122~116401336-116402182~116403419-116403600
SE.20578	ENSMUSG00000031728.10	Zfp821	chr8	+	0.738	1	1	0.47	1	0.145	0.374	3.34015e-05	0.00107158	SE	109706087-109706419~109708028-109708144~109709410-109709527
A3SS.2995	ENSMUSG00000032504.15	Pdcd6ip	chr9	-	0.138	0.115	0.138	0.022	0.023	0.022	0.108	1.16893e-05	0.00107931	A3SS	113685306-113685423~113685423-113685438~113687624-113687725
SE.9504	ENSMUSG00000037426.18	Depdc5	chr5	+	1	0.726	1	0.498	0.589	0.498	0.38	3.37165e-05	0.00108011	SE	32863712-32863743~32864009-32864312~32864576-32864699
SE.19856	ENSMUSG00000031508.14	Ankrd10	chr8	-	0.325	0.325	0.088	0.695	0.875	0.647	-0.493	3.37914e-05	0.00108093	SE	11619061-11619297~11623696-11623858~11628438-11628530
SE.491	ENSMUSG00000034820.4	Cpsf7	chr19	+	0	0	0	0.2	0	0.104	-0.101	3.39642e-05	0.00108488	SE	10531780-10531999~10532130-10532196~10532819-10532923
A3SS.2639	ENSMUSG00000030706.17	Mrpl48	chr7	-	1	0	0	1	1	0.502	-0.501	1.22531e-05	0.00109809	A3SS	100565193-100565279~100565279-100565427~100571251-100571289
SE.1950	ENSMUSG00000022701.18	Ccdc191	chr16	+	0.442	1	1	0	1	0	0.481	3.44866e-05	0.00109997	SE	43889799-43890038~43892152-43892191~43898089-43898231
MXE.288	ENSMUSG00000100410.1	2310020H05Rik	chr13	-	1	1	1	0.795	0.912	0.823	0.157	6.5582e-05	0.00110238	MXE	99078708-99078850~99078932-99079038;99083827-99083924~99087853-99087921
SE.16635	ENSMUSG00000030556.13	Lrrc28	chr7	-	0.962	1	1	0.817	0.759	0.908	0.159	3.48179e-05	0.00110893	SE	67619073-67619111~67628294-67628335~67641103-67641340
SE.15019	ENSMUSG00000026972.15	Arrdc1	chr2	-	1	0.889	1	1	0.62	0.564	0.235	3.53201e-05	0.00112247	SE	24927125-24927176~24927728-24927839~24935027-24935054
SE.18904	ENSMUSG00000024566.10	Atp9b	chr18	-	1	1	1	0.856	0.292	0.926	0.309	3.53454e-05	0.00112247	SE	80795289-80795432~80836354-80836431~80844526-80844602
SE.1005	ENSMUSG00000024085.13	Man2a1	chr17	+	0.869	0.706	0.67	0.915	1	0.954	-0.208	3.5641e-05	0.00113022	SE	64625306-64625451~64636483-64636655~64651195-64651323
SE.2572	ENSMUSG00000023026.16	Dip2b	chr15	+	0.666	0.732	0.727	0.935	0.872	0.931	-0.204	3.62354e-05	0.00114742	SE	100142021-100142147~100151150-100151363~100154156-100154306
A3SS.2696	ENSMUSG00000030786.18	Itgam	chr7	+	0	0	0.246	0.746	0.395	0.303	-0.399	1.32553e-05	0.00115296	A3SS	128101415-128101556~128101633-128101636~128101636-128101846
A3SS.2848	ENSMUSG00000033763.14	Mtss2	chr8	+	0.818	0.849	0.821	0.68	0.744	0.632	0.144	1.36221e-05	0.00115296	A3SS	110730022-110730120~110731961-110732057~110732057-110732178
SE.15405	ENSMUSG00000039033.11	Tasp1	chr2	-	0.944	1	0.935	0.777	0.48	0.942	0.227	3.69058e-05	0.00116697	SE	139976531-139977713~139985128-139985208~139996072-139996157
A5SS.1389	ENSMUSG00000068329.12	Htra2	chr6	-	0.445	1	1	0.138	0.211	0.762	0.445	1.74782e-05	0.00116975	A5SS	83052472-83052542~83053000-83053037~83053037-83053070
A3SS.336	ENSMUSG00000056917.13	Sipa1	chr19	-	0.622	0.712	0.767	0.292	0.142	0.142	0.508	1.42652e-05	0.00117476	A3SS	5661595-5661626~5661626-5661658~5662587-5662841
SE.14733	ENSMUSG00000031488.14	Rab11fip1	chr8	-	1	1	1	0.642	1	0.344	0.338	3.73628e-05	0.00117972	SE	27150694-27150803~27151596-27153159~27154145-27154935
SE.20230	ENSMUSG00000033389.16	Arhgap44	chr11	-	0.656	0.922	0.712	0.255	0.498	0.36	0.392	3.74897e-05	0.00118203	SE	65002038-65003450~65005453-65005505~65008062-65008440
SE.18417	ENSMUSG00000025728.16	Pigq	chr17	-	1	1	1	1	0.879	0.808	0.104	3.75529e-05	0.00118233	SE	25930957-25931038~25931461-25931673~25934757-25934801
SE.5067	ENSMUSG00000023764.18	Sfi1	chr11	-	1	0.88	1	0.674	1	0.497	0.236	3.77114e-05	0.00118562	SE	3187239-3187410~3188940-3189056~3193359-3193407
SE.2091	ENSMUSG00000033697.16	Arhgap39	chr15	-	1	1	1	1	0.649	0.236	0.372	3.78251e-05	0.00118749	SE	76727402-76727476~76730363-76730456~76734876-76735438
SE.2224	ENSMUSG00000022197.16	Pdzd2	chr15	-	0.959	1	0.898	0.762	0.855	0.773	0.156	3.80766e-05	0.00119368	SE	12372446-12376380~12382598-12382743~12385160-12385948
SE.13823	ENSMUSG00000032175.11	Tyk2	chr9	-	0.863	1	1	0.898	0.698	0.674	0.198	3.81358e-05	0.00119384	SE	21114192-21114320~21115191-21115279~21115371-21115548
SE.14149	ENSMUSG00000051747.15	Ttn	chr2	-	0.988	0.95	0.98	0.923	0.9	0.924	0.057	3.84593e-05	0.00120225	SE	76838811-76838895~76844204-76844279~76847387-76847471
SE.1914	ENSMUSG00000034653.11	Ythdc2	chr18	+	0.514	0.729	1	1	1	1	-0.252	3.86787e-05	0.00120739	SE	44877617-44877795~44885122-44885326~44886239-44886422
MXE.1331	ENSMUSG00000061462.18	Obscn	chr11	-	0.164	0.22	0.271	0.331	0.251	0.39	-0.106	7.40384e-05	0.0012351	MXE	59051527-59051794~59052444-59052711;59064186-59064450~59067065-59067329
SE.3684	ENSMUSG00000014503.15	Pkd2l2	chr18	+	1	0	1	0	0	0	0.667	3.99825e-05	0.00124392	SE	34435315-34435367~34438101-34438214~34438730-34438832
SE.16982	ENSMUSG00000030852.18	Tacc2	chr7	+	0.049	0.022	0.039	0.003	0.019	0.012	0.025	3.99788e-05	0.00124392	SE	130728522-130729828~130731530-130731566~130733505-130733566
SE.17798	ENSMUSG00000032860.5	P2ry2	chr7	-	0.985	0.954	0.983	0.906	0.792	0.985	0.08	4.00187e-05	0.00124392	SE	100996567-100999100~101003563-101003754~101011711-101011998
SE.20155	ENSMUSG00000029769.16	Ccdc136	chr6	+	1	1	1	0.805	0.716	0.958	0.174	4.03234e-05	0.00125162	SE	29412901-29413087~29414785-29414980~29426624-29426857
A3SS.2976	ENSMUSG00000032582.14	Rbm6	chr9	-	0.81	0.74	0.555	1	0.842	1	-0.246	1.56435e-05	0.00125436	A3SS	107852124-107853403~107853403-107853674~107860348-107860459
SE.16098	ENSMUSG00000029471.13	Camkk2	chr5	-	0	0	0.1	0.609	0.437	0.25	-0.399	4.05674e-05	0.00125742	SE	122731169-122734245~122736987-122737030~122737432-122737533
SE.11931	ENSMUSG00000021470.19	Ercc6l2	chr13	+	0.877	0.885	0.829	1	1	1	-0.136	4.09693e-05	0.0012667	SE	63877378-63877533~63894637-63894819~63898533-63899503
SE.13236	ENSMUSG00000061462.18	Obscn	chr11	-	0.935	0.776	0.94	0.593	0.578	0.78	0.233	4.0982e-05	0.0012667	SE	59054161-59054425~59061423-59061687~59062030-59062294
A3SS.563	ENSMUSG00000025571.13	Tnrc6c	chr11	+	0.065	0.193	0.155	0.029	0.048	0	0.112	1.63124e-05	0.00127445	A3SS	117739866-117740009~117741644-117741668~117741668-117741818
SE.12228	ENSMUSG00000055322.16	Tns1	chr1	-	0.951	0.969	0.972	0.924	0.892	0.884	0.064	4.15261e-05	0.00128171	SE	73937224-73937317~73941909-73942106~73952420-73953950
MXE.2135	ENSMUSG00000015501.10	Hivep2	chr10	+	0.55	0	0	0.924	0.896	0.83	-0.7	7.775e-05	0.00128726	MXE	14066582-14066684~14110664-14110786;14123017-14123200~14126451-14126496
MXE.1966	ENSMUSG00000047767.17	Atg16l2	chr7	-	1	1	0.603	0.474	0.741	0.532	0.285	7.90347e-05	0.00129876	MXE	101297159-101297233~101299005-101299108;101300111-101300211~101301900-101302071
SE.12433	ENSMUSG00000052707.8	Tnrc6a	chr7	+	0.825	0.524	0.486	0.834	1	1	-0.333	4.21952e-05	0.00130054	SE	123124667-123124715~123143749-123143837~123162493-123162877
A3SS.2605	ENSMUSG00000030979.13	Uros	chr7	-	0.903	1	1	0.708	0.869	0.629	0.232	1.71108e-05	0.00130341	A3SS	133690507-133690593~133690593-133691166~133697668-133697743
SE.7692	ENSMUSG00000028116.13	Myoz2	chr3	-	0.052	0.093	0.058	0.027	0.03	0.018	0.043	4.28574e-05	0.00131725	SE	123026062-123026232~123033191-123033363~123034191-123034280
SE.9542	ENSMUSG00000029177.9	Cenpa	chr5	+	1	1	0.611	0.549	0	0.758	0.435	4.28091e-05	0.00131725	SE	30666896-30667113~30669691-30669828~30672463-30672570
MXE.1704	ENSMUSG00000020593.16	Lpin1	chr12	-	0.338	0.369	0.325	0.228	0.2	0.207	0.132	8.15338e-05	0.00132991	MXE	16579881-16579977~16580703-16580904;16612552-16612609~16646836-16646966
A5SS.1297	ENSMUSG00000028101.18	Pias3	chr3	+	1	1	0.926	0.554	0.806	0.799	0.256	2.09055e-05	0.00134915	A5SS	96703525-96703628~96703628-96703659~96703738-96703907
MXE.318	ENSMUSG00000021432.15	Slc35b3	chr13	-	1	1	0	0.771	0	0	0.41	8.33673e-05	0.00134981	MXE	38943058-38943166~38944499-38944654;38954108-38954230~38955820-38955936
SE.15721	ENSMUSG00000029106.14	Add1	chr5	+	0.591	0.865	0.706	1	1	0.974	-0.271	4.40591e-05	0.0013523	SE	34628414-34628513~34629135-34629172~34630234-34630284
SE.9622	ENSMUSG00000006476.19	Nsmf	chr2	+	0.892	1	1	0.733	0.883	0.631	0.215	4.48786e-05	0.00137553	SE	25057100-25057176~25058252-25058321~25059020-25059045
SE.18915	ENSMUSG00000030689.15	Ino80e	chr7	-	0.145	0.189	0.145	0.016	0	0.072	0.13	4.49999e-05	0.00137732	SE	126852817-126852991~126853488-126853580~126857225-126857342
SE.13387	ENSMUSG00000026883.17	Dab2ip	chr2	+	1	0.988	1	0.977	0.902	0.972	0.046	4.50714e-05	0.00137759	SE	35643887-35643991~35661491-35661625~35707647-35707801
MXE.1857	ENSMUSG00000075318.13	Scn2a	chr2	+	0	0	0	0.259	0.083	0.03	-0.124	8.58727e-05	0.00138023	MXE	65681996-65682125~65682502-65682594;65682689-65682781~65683670-65683943
MXE.160	ENSMUSG00000045983.16	Eif4g1	chr16	+	0.219	0.191	0.176	0.248	0.258	0.318	-0.079	8.66445e-05	0.00138254	MXE	20672748-20672876~20673598-20673655;20675343-20675520~20675729-20675829
SE.18608	ENSMUSG00000039126.10	Prune2	chr19	+	0.442	0.613	0	0.856	1	1	-0.6	4.58927e-05	0.00140075	SE	17211677-17211713~17212291-17212330~17220783-17221809
SE.8303	ENSMUSG00000097571.9	Jpx	chrX	+	0.349	0.616	0.349	1	1	1	-0.562	4.61376e-05	0.00140627	SE	103496437-103496530~103524866-103524996~103529644-103530710
SE.9870	ENSMUSG00000026914.15	Psmd14	chr2	+	1	1	1	0.942	0.691	1	0.122	4.68892e-05	0.0014272	SE	61720443-61720571~61722709-61722848~61760635-61760707
SE.18899	ENSMUSG00000030979.13	Uros	chr7	-	0.948	1	1	0.839	0.937	0.776	0.132	4.72455e-05	0.00143605	SE	133690507-133690593~133691085-133691166~133697668-133697743
SE.5066	ENSMUSG00000023764.18	Sfi1	chr11	-	1	0.646	1	0.497	1	0.186	0.321	4.73295e-05	0.00143662	SE	3187239-3187410~3188877-3189056~3193359-3193424
RI.1756	ENSMUSG00000015790.16	Surf1	chr2	-	0.492	0.511	0.13	0.817	1	0.801	-0.495	1.78303e-05	0.00143831	RI	26915595-26915769~26915595-26916006~26915954-26916006
SE.8139	ENSMUSG00000042642.13	Flad1	chr3	-	0.985	0.985	1	0.965	0.898	0.826	0.094	4.76881e-05	0.00144551	SE	89408421-89409166~89411157-89411380~89411783-89411863
SE.9827	ENSMUSG00000040025.17	Ythdf2	chr4	-	0.9	0.953	0.921	0.785	0.706	0.835	0.149	4.78456e-05	0.00144829	SE	132184911-132186947~132204131-132205715~132210751-132210831
RI.2707	ENSMUSG00000036672.5	Cenpt	chr8	-	0.664	1	1	0.497	0.248	0.116	0.601	1.84966e-05	0.00145173	RI	105844672-105844995~105844672-105845178~105845073-105845178
A3SS.1242	ENSMUSG00000028212.16	Ccne2	chr4	+	0.71	0.774	0	1	1	1	-0.505	1.96817e-05	0.00145464	A3SS	11192680-11192717~11192814-11192817~11192817-11192911
A3SS.2468	ENSMUSG00000069601.14	Ank3	chr10	+	0.889	0.862	0.799	0.689	0.722	0.727	0.137	2.00508e-05	0.00145464	A3SS	69999354-69999498~70001922-70002510~70002510-70002601
SE.13541	ENSMUSG00000037652.15	Phc3	chr3	-	0	0.111	0	0.523	0.059	0.255	-0.242	4.82807e-05	0.00145945	SE	30931738-30931892~30935951-30936020~30936284-30937156
MXE.1115	ENSMUSG00000085396.7	Firre	chrX	-	1	0.461	1	0.631	0.631	0	0.4	9.37766e-05	0.00148558	MXE	50600743-50600898~50603438-50603525;50608477-50608604~50608686-50608814
SE.20825	ENSMUSG00000036644.15	Tbc1d9b	chr11	+	0.913	1	1	0.784	0.835	0.792	0.167	4.93774e-05	0.00149055	SE	50163824-50163896~50168168-50168225~50168695-50168802
SE.16014	ENSMUSG00000028869.13	Gnl2	chr4	+	1	0.965	1	0.94	0.691	0.895	0.146	4.9755e-05	0.00149988	SE	125035214-125035309~125037521-125037661~125040936-125041121
SE.10358	ENSMUSG00000032503.18	Arpp21	chr9	-	1	0.546	1	0.345	0.265	0.376	0.52	5.00737e-05	0.00150742	SE	112149334-112149372~112155417-112155516~112157689-112157798
SE.18263	ENSMUSG00000054808.15	Actn4	chr7	-	0.025	0.084	0.065	0.12	0.168	0.147	-0.087	5.12153e-05	0.00153968	SE	28894500-28894659~28895120-28895180~28895431-28895512
SE.11984	ENSMUSG00000033060.16	Lmo7	chr14	+	0.922	0.899	0.893	0.948	1	0.993	-0.076	5.22727e-05	0.00156718	SE	101929175-101929451~101931171-101931280~101932569-101932672
SE.15170	ENSMUSG00000056268.15	Dennd1b	chr1	+	0.951	1	1	0.878	0.69	0.87	0.171	5.22427e-05	0.00156718	SE	139023104-139023148~139041923-139042043~139053345-139053415
SE.798	ENSMUSG00000034295.10	Fhod3	chr18	+	0.833	0.946	0.982	1	0.978	1	-0.072	5.25855e-05	0.00157441	SE	25001790-25002032~25022621-25022978~25028064-25028169
SE.13395	ENSMUSG00000115869.1	Gm31814	chr16	-	0.808	1	1	0.507	0.808	0.752	0.247	5.33605e-05	0.00159544	SE	24186028-24186285~24192920-24193091~24204738-24204896
RI.1383	ENSMUSG00000026107.11	Nabp1	chr1	-	0.946	0.891	0.877	0.698	0.57	0.756	0.23	2.09274e-05	0.0015993	RI	51469819-51469926~51469819-51471411~51470970-51471411
SE.6442	ENSMUSG00000066036.14	Ubr4	chr4	+	0.881	0.888	0.905	0.813	0.718	0.721	0.141	5.36303e-05	0.00160133	SE	139431544-139431761~139432481-139432514~139433619-139433683
SE.19341	ENSMUSG00000059119.9	Nap1l4	chr7	-	0.228	0.404	0.382	0.542	0.63	0.524	-0.227	5.38174e-05	0.00160474	SE	143513578-143514637~143518849-143518885~143520383-143520440
SE.17424	ENSMUSG00000031169.13	Porcn	chrX	-	1	0.535	0.223	1	1	1	-0.414	5.42345e-05	0.00161498	SE	8193847-8194277~8197974-8198085~8199066-8199152
SE.18486	ENSMUSG00000022607.18	Ptk2	chr15	-	0.268	0.168	0.163	0.034	0.059	0	0.169	5.44373e-05	0.00161883	SE	73274486-73274584~73275620-73275641~73276856-73276913
MXE.2025	ENSMUSG00000031508.14	Ankrd10	chr8	-	0.973	0.915	0.876	0.724	0.774	0.812	0.151	0.000103019	0.00162034	MXE	11619061-11619297~11620261-11620373;11628438-11628530~11632865-11633018
A3SS.776	ENSMUSG00000043822.18	Adamtsl5	chr10	-	1	0.89	1	0.84	0.946	0.61	0.165	2.33585e-05	0.0016227	A3SS	80345042-80345103~80345103-80345416~80345512-80345703
A3SS.1778	ENSMUSG00000020368.15	Canx	chr11	-	0.934	0.964	0.854	1	1	0.977	-0.075	2.40912e-05	0.0016227	A3SS	50311603-50311780~50311780-50311784~50325492-50325673
A3SS.1868	ENSMUSG00000062647.16	Rpl7a	chr2	+	0	0	0.402	0.402	0.574	0.729	-0.434	2.34875e-05	0.0016227	A3SS	26912018-26912159~26912292-26912365~26912365-26912445
A3SS.2319	ENSMUSG00000018566.14	Slc2a4	chr11	-	0.957	0.969	0.989	0.935	0.935	0.862	0.061	2.44975e-05	0.0016227	A3SS	69945837-69945953~69945953-69946193~69946285-69946458
A3SS.2484	ENSMUSG00000053175.17	Bcl3	chr7	-	1	1	1	0.799	0.62	0.521	0.353	2.51499e-05	0.00163046	A3SS	19808461-19808930~19808930-19809056~19809141-19809259
SE.3001	ENSMUSG00000021608.15	Lpcat1	chr13	+	1	1	0.942	0.797	0.434	0.918	0.264	5.50671e-05	0.00163534	SE	73467196-73467517~73484260-73484403~73488886-73489101
MXE.898	ENSMUSG00000028478.18	Clta	chr4	+	0.052	0.045	0.162	0.238	0.347	0.295	-0.207	0.000105569	0.00164868	MXE	44025448-44025560~44030214-44030268;44031399-44031435~44032400-44032846
A3SS.1824	ENSMUSG00000033540.18	Idua	chr5	+	0.545	0.868	0.706	0.894	1	1	-0.258	2.6064e-05	0.00165452	A3SS	108680110-108680206~108680294-108680394~108680394-108680497
A3SS.1950	ENSMUSG00000034903.18	Cobll1	chr2	-	1	1	1	0.956	0.746	0.38	0.306	2.73854e-05	0.00166887	A3SS	65097632-65099389~65099389-65099392~65102068-65102166
A3SS.2666	ENSMUSG00000030759.16	Far1	chr7	+	0.958	1	0.951	0.805	0.808	0.854	0.147	2.7303e-05	0.00166887	A3SS	113525987-113526038~113539272-113539276~113539276-113539466
A5SS.506	ENSMUSG00000029152.13	Ociad1	chr5	+	0.126	0.165	0.124	0.099	0.054	0.043	0.073	2.68436e-05	0.00167263	A5SS	73306577-73306753~73306753-73306798~73310273-73310426
SE.5721	ENSMUSG00000026950.18	Neb	chr2	-	0.956	0.956	0.955	0.983	0.988	0.994	-0.033	5.67873e-05	0.00168415	SE	52154569-52154662~52157290-52157383~52157831-52157912
SE.8739	ENSMUSG00000028478.18	Clta	chr4	+	0.516	0.797	0.769	0.485	0.337	0.177	0.361	5.71583e-05	0.00169287	SE	44025448-44025560~44031399-44031435~44032400-44032846
RI.1943	ENSMUSG00000002107.18	Celf2	chr2	-	0.043	0.027	0.029	0.061	0.049	0.06	-0.024	2.33976e-05	0.00169867	RI	6604023-6604182~6604023-6607961~6607881-6607961
RI.2771	ENSMUSG00000038895.16	Zfp653	chr9	-	0.919	1	1	0.836	0.332	0.795	0.319	2.3108e-05	0.00169867	RI	22057500-22057702~22057500-22058415~22057803-22058415
A3SS.1799	ENSMUSG00000032507.15	Fbxl2	chr9	-	0.118	0	0	0.444	0.211	0.323	-0.287	2.86497e-05	0.00171168	A3SS	113983984-113984041~113984041-113984116~113984540-113984585
SE.650	ENSMUSG00000042439.13	Zfp532	chr18	+	0.382	0.241	0.166	0.102	0	0	0.229	5.81297e-05	0.00171933	SE	65582896-65583006~65605331-65605370~65622983-65623508
SE.5688	ENSMUSG00000026950.18	Neb	chr2	-	0.9	0.867	0.844	0.642	0.779	0.839	0.117	5.84261e-05	0.00172577	SE	52153055-52153148~52153682-52153775~52159476-52159569
A5SS.682	ENSMUSG00000054252.18	Fgfr3	chr5	+	0	0.087	0	0.254	0.415	0.242	-0.275	2.87429e-05	0.00173128	A5SS	33721723-33721928~33721928-33721954~33722305-33722511
SE.2367	ENSMUSG00000024346.6	Pfdn1	chr18	-	1	0.865	1	0.786	0.578	1	0.167	5.89247e-05	0.00173816	SE	36403675-36404460~36432305-36432390~36451079-36451246
SE.19247	ENSMUSG00000021646.9	Mccc2	chr13	-	0.157	0.143	0.1	0.06	0	0.019	0.107	5.90968e-05	0.0017409	SE	100000249-100000316~100009649-100009740~100015385-100015618
A3SS.1101	ENSMUSG00000030035.14	Wbp1	chr6	-	0.555	0.481	0.539	0.847	0.792	1	-0.355	2.97542e-05	0.00174348	A3SS	83120184-83120287~83120287-83120876~83121202-83121559
SE.21283	ENSMUSG00000032355.16	Mlip	chr9	-	0.793	0.841	0.943	0.561	0.695	0.356	0.322	5.93502e-05	0.00174602	SE	77181351-77181396~77190671-77190737~77216976-77217048
SE.1652	ENSMUSG00000022847.15	Thpo	chr16	-	0.17	0.552	0.418	1	0.742	0.831	-0.478	6.01541e-05	0.00176731	SE	20728381-20728468~20728718-20728933~20729063-20729217
RI.964	ENSMUSG00000038828.13	Tmem214	chr5	+	0.161	0.282	0.167	0.479	0.409	0.371	-0.216	2.5001e-05	0.0017708	RI	30872686-30872768~30872686-30873144~30873042-30873144
SE.11443	ENSMUSG00000087590.2	Epb41l4aos	chr18	+	0.902	0.638	1	1	1	1	-0.153	6.05125e-05	0.00177547	SE	33794891-33795124~33795382-33795445~33795852-33795986
SE.9811	ENSMUSG00000000827.18	Tpd52l2	chr2	+	1	1	0.957	0.882	0.966	0.865	0.081	6.06034e-05	0.00177576	SE	181508165-181508267~181510503-181510530~181511573-181511615
A5SS.1014	ENSMUSG00000026407.17	Cacna1s	chr1	+	0.173	0.132	0	0.476	0.353	0.708	-0.411	3.15481e-05	0.00183895	A5SS	136118335-136118427~136118427-136118442~136118669-136118813
SE.10257	ENSMUSG00000069631.14	Strada	chr11	-	1	1	1	1	0	0.265	0.578	6.32902e-05	0.00185202	SE	106173678-106173781~106184561-106184619~106187100-106187180
SE.5859	ENSMUSG00000024924.14	Vldlr	chr19	+	1	0.987	1	0.93	0.977	0.9	0.06	6.39919e-05	0.00186905	SE	27239621-27239741~27239844-27239970~27240465-27240637
SE.13986	ENSMUSG00000051747.15	Ttn	chr2	-	0.981	0.918	0.757	0.975	1	0.98	-0.1	6.40425e-05	0.00186905	SE	76826994-76827078~76827482-76827560~76827691-76827766
SE.9949	ENSMUSG00000035969.15	Rusc2	chr4	+	0	0.158	0.13	0.2	0.25	0.4	-0.187	6.47073e-05	0.00188595	SE	43406556-43406680~43413004-43413054~43414627-43414755
SE.2783	ENSMUSG00000021772.15	Nkiras1	chr14	+	0.332	0.473	0.538	0.193	0.143	0.143	0.288	6.50297e-05	0.00189284	SE	18276695-18276806~18277843-18278101~18278303-18278545
SE.7549	ENSMUSG00000045962.16	Wnk1	chr6	-	0.851	0.778	0.776	0.931	0.96	0.891	-0.126	6.56114e-05	0.00190724	SE	119929832-119929867~119932668-119932761~119934255-119934328
SE.197	ENSMUSG00000019088.14	Dnase1l1	chrX	-	0.947	0.85	0.923	0.758	0.734	0.607	0.207	6.6189e-05	0.00191896	SE	74274367-74274468~74276645-74276734~74277038-74277342
SE.1372	ENSMUSG00000040666.19	Sh3bgr	chr16	+	0.987	0.974	1	0.946	0.982	0.889	0.048	6.61638e-05	0.00191896	SE	96206481-96206667~96214012-96214093~96219488-96219501
SE.15236	ENSMUSG00000033526.16	Ppip5k1	chr2	-	0.909	0.869	0.922	0.71	0.838	0.816	0.112	6.65206e-05	0.00192603	SE	121321689-121321792~121323193-121323376~121331557-121331648
MXE.43	ENSMUSG00000024743.16	Syt7	chr19	+	0.349	0.251	1	0.843	1	1	-0.414	0.000124378	0.00192874	MXE	10417962-10418042~10421756-10421888;10422784-10423012~10426298-10426667
SE.21845	ENSMUSG00000038774.9	Ascc3	chr10	+	0.892	1	1	0.84	0.767	0.85	0.145	6.70072e-05	0.00193757	SE	50604750-50604882~50607919-50608070~50617711-50618271
SE.8742	ENSMUSG00000063889.16	Crem	chr18	-	1	1	1	0.547	0.326	1	0.376	6.79558e-05	0.00196241	SE	3273421-3273578~3276693-3276729~3281687-3281738
RI.1717	ENSMUSG00000033540.18	Idua	chr5	+	0.494	0.889	0.689	0.889	1	1	-0.272	2.85766e-05	0.00197587	RI	108680110-108680206~108680110-108680497~108680394-108680497
SE.47	ENSMUSG00000041115.16	Iqsec2	chrX	+	1	1	1	1	0.665	0.799	0.179	6.88382e-05	0.00198289	SE	152166933-152166963~152180996-152181092~152193865-152194601
SE.3223	ENSMUSG00000021302.10	Ggps1	chr13	-	0.699	0.944	0.95	1	1	1	-0.136	6.88453e-05	0.00198289	SE	14050658-14054455~14055149-14055220~14057795-14057888
SE.21820	ENSMUSG00000038302.14	Afg1l	chr10	-	0.059	0	0.038	0.099	0.283	0.149	-0.145	6.95184e-05	0.00199965	SE	42360164-42360247~42394825-42395017~42400340-42400399
SE.11485	ENSMUSG00000026773.19	Pfkfb3	chr2	-	0.9	0.769	0.936	0.593	0.79	0.48	0.247	6.96976e-05	0.00200219	SE	11474406-11474543~11478035-11478058~11480197-11480371
RI.68	ENSMUSG00000056185.5	Snx32	chr19	-	0.719	0.727	1	0.355	0.326	0.338	0.476	3.08192e-05	0.00201104	RI	5496315-5496402~5496315-5497025~5496985-5497025
RI.1751	ENSMUSG00000027404.15	Snrpb	chr2	-	0.046	0.085	0.077	0.053	0.024	0.013	0.039	3.01634e-05	0.00201104	RI	130172602-130172728~130172602-130173174~130173035-130173174
RI.2896	ENSMUSG00000021820.18	Camk2g	chr14	-	0.055	0.054	0.057	0.092	0.095	0.133	-0.051	3.11628e-05	0.00201104	RI	20764860-20764955~20764860-20765479~20765395-20765479
SE.17619	ENSMUSG00000064181.6	Rab3ip	chr10	-	0.867	0.897	1	0.67	0.604	0.753	0.246	7.07241e-05	0.00202902	SE	116919573-116919651~116928188-116928284~116937396-116937655
MXE.1026	ENSMUSG00000028538.12	St3gal3	chr4	-	0.709	0.709	0.709	0.494	0.529	0.313	0.264	0.000132521	0.00204064	MXE	118014704-118014797~118031839-118031882;118054649-118054697~118107548-118107693
SE.6396	ENSMUSG00000004319.15	Clcn3	chr8	-	0.115	0.022	0.06	0.04	0.025	0	0.044	7.14982e-05	0.00204856	SE	60910860-60913175~60914577-60914828~60919339-60919556
SE.7896	ENSMUSG00000056367.14	Actr3b	chr5	+	0.686	0.327	0.744	1	1	1	-0.414	7.20001e-05	0.00205757	SE	25760025-25760128~25798445-25798501~25809784-25809909
SE.8111	ENSMUSG00000034544.17	Rsrc1	chr3	+	1	1	1	0.876	0.83	0.916	0.126	7.19067e-05	0.00205757	SE	66994516-66994712~66996464-66996590~67082535-67082709
RI.308	ENSMUSG00000062906.12	Hdac10	chr15	-	0.795	0.563	0.528	1	1	1	-0.371	3.28301e-05	0.00207258	RI	89126377-89126437~89126377-89126995~89126868-89126995
SE.20791	ENSMUSG00000040560.10	Wdr7	chr18	+	0.307	0.213	0.295	0.604	0.611	0.51	-0.303	7.2785e-05	0.0020773	SE	63779868-63779957~63791795-63791891~63794224-63794343
SE.9299	ENSMUSG00000019841.15	Rev3l	chr10	+	0.14	0.107	0.351	0.045	0	0	0.184	7.29517e-05	0.00207936	SE	39847974-39848083~39851276-39851403~39851866-39852073
SE.14159	ENSMUSG00000051747.15	Ttn	chr2	-	1	0.988	0.976	0.987	0.881	0.906	0.063	7.4105e-05	0.0021095	SE	76842770-76842848~76847112-76847196~76847387-76847471
A3SS.1755	ENSMUSG00000026173.15	Plcd4	chr1	+	0.018	0	0	0.039	0.126	0.169	-0.105	3.7336e-05	0.00214647	A3SS	74560289-74560493~74562020-74562054~74562054-74562223
SE.11305	ENSMUSG00000026305.15	Lrrfip1	chr1	+	0.873	0.955	0.718	0.963	1	0.968	-0.128	7.6549e-05	0.00217625	SE	91084945-91085005~91087058-91087124~91088633-91088711
SE.16540	ENSMUSG00000029629.17	Phf14	chr6	+	0.531	0.768	0.7	1	0.959	0.754	-0.238	7.67645e-05	0.00217956	SE	11987003-11987274~11987575-11987682~11988721-11988817
SE.21045	ENSMUSG00000032267.8	Usp28	chr9	+	1	1	1	0.874	0.924	0.978	0.075	7.69872e-05	0.00218306	SE	49032213-49032353~49033576-49033672~49035592-49035771
SE.1607	ENSMUSG00000022801.13	Lrch3	chr16	+	0.115	0.075	0.105	0.352	0.159	0.386	-0.201	7.72302e-05	0.00218431	SE	33005663-33005741~33009188-33009436~33012340-33012699
SE.20569	ENSMUSG00000021481.11	Zfp346	chr13	+	0.945	1	1	0.723	0.755	0.913	0.185	7.71496e-05	0.00218431	SE	55122015-55122515~55130533-55130627~55132306-55132356
SE.8150	ENSMUSG00000054252.18	Fgfr3	chr5	+	1	0.595	1	0	1	0.269	0.442	7.80257e-05	0.00220398	SE	33727646-33727916~33728191-33728245~33729680-33729837
SE.14960	ENSMUSG00000057234.9	Mettl15	chr2	-	0	0	0	0.053	0.12	0.148	-0.107	8.04536e-05	0.00226964	SE	109191551-109191688~109240279-109240416~109274388-109274675
SE.11531	ENSMUSG00000026782.15	Abi2	chr1	+	0	0	0	0.138	0.058	0.146	-0.114	8.0754e-05	0.00227228	SE	60448077-60448202~60450169-60450253~60453603-60453762
SE.12071	ENSMUSG00000025949.16	Pikfyve	chr1	+	0.659	0.843	0.928	0.357	0.567	0.195	0.437	8.07023e-05	0.00227228	SE	65192144-65192294~65192530-65192566~65195655-65195774
SE.2987	ENSMUSG00000064138.14	Fam172a	chr13	+	0.689	0.66	0.653	0.929	0.9	0.926	-0.251	8.13698e-05	0.00228668	SE	77759427-77759529~77761837-77761938~77825322-77825388
MXE.637	ENSMUSG00000070733.13	Fryl	chr5	-	0.658	0.652	0.76	0.51	0.484	0.37	0.235	0.00015003	0.00229421	MXE	73148016-73148222~73194985-73195113;73220907-73221072~73256399-73256425
SE.14798	ENSMUSG00000027257.13	Pacsin3	chr2	+	1	0.566	0.501	1	1	0.851	-0.261	8.19858e-05	0.00230105	SE	91255953-91256190~91256301-91256343~91259863-91259927
RI.2251	ENSMUSG00000038346.18	Zfp384	chr6	+	0.849	1	1	0.837	0.434	0.672	0.302	3.74808e-05	0.00231584	RI	125024032-125024270~125024032-125024552~125024413-125024552
RI.1495	ENSMUSG00000028542.17	Slc6a9	chr4	+	0	0	0.161	0.434	0.161	0.207	-0.214	3.92794e-05	0.0023279	RI	117864404-117864642~117864404-117864888~117864753-117864888
RI.2504	ENSMUSG00000027247.16	Arhgap1	chr2	+	0.777	0.367	0.635	1	1	1	-0.407	3.85214e-05	0.0023279	RI	91651497-91651654~91651497-91651823~91651763-91651823
MXE.2089	ENSMUSG00000013076.17	Amotl1	chr9	-	0.12	0.108	0.152	0.071	0.076	0.094	0.046	0.000153301	0.00232805	MXE	14575150-14575439~14592753-14593711;14596450-14596600~14614733-14615006
A5SS.163	ENSMUSG00000023007.15	Prpf40b	chr15	+	0	0	0.093	0.34	0.316	0.148	-0.237	4.14285e-05	0.00233941	A5SS	99315479-99315569~99315569-99315581~99315722-99315900
SE.17740	ENSMUSG00000030279.15	C2cd5	chr6	-	0.067	0.154	0.105	0	0.031	0	0.098	8.38743e-05	0.00235105	SE	143061752-143061861~143066185-143066218~143067055-143067085
SE.16616	ENSMUSG00000029771.12	Irf5	chr6	+	0.972	0.951	1	0.868	0.804	0.93	0.107	8.50981e-05	0.00238231	SE	29533951-29534141~29534534-29534593~29535040-29535074
SE.14716	ENSMUSG00000051736.8	Fam229b	chr10	-	1	0.318	1	0.238	0.584	0.483	0.338	8.59933e-05	0.00240431	SE	39118867-39119034~39120225-39120396~39122176-39122335
SE.12444	ENSMUSG00000058254.12	Tspan7	chrX	+	0.992	1	1	0.941	0.975	0.949	0.042	8.69565e-05	0.00242815	SE	10585496-10585652~10590135-10590219~10595278-10595354
A3SS.1724	ENSMUSG00000037447.16	Arid5a	chr1	+	1	1	1	0.818	0.94	0.797	0.148	4.35942e-05	0.00243206	A3SS	36307753-36307836~36316208-36316211~36316211-36316327
A3SS.2050	ENSMUSG00000028273.15	Pdlim5	chr3	-	0.89	0.636	0.816	0.503	0.57	0.568	0.234	4.39e-05	0.00243206	A3SS	142312122-142312214~142312214-142312541~142314405-142314448
RI.1264	ENSMUSG00000048865.16	Arhgap30	chr1	+	0.023	0	0	0.113	0.253	0.113	-0.152	4.19449e-05	0.00243616	RI	171403212-171403340~171403212-171403955~171403780-171403955
RI.2716	ENSMUSG00000031897.9	Psmb10	chr8	-	0.092	0.079	0.202	0.071	0	0.014	0.096	4.28856e-05	0.00244196	RI	105937240-105937381~105937240-105937591~105937493-105937591
SE.10744	ENSMUSG00000034731.11	Dgkh	chr14	-	0.211	0	0	0.286	0.071	0.516	-0.221	8.75632e-05	0.00244199	SE	78570002-78570157~78575886-78576017~78577448-78577557
SE.9646	ENSMUSG00000041926.15	Rnpep	chr1	-	1	1	0.97	0.93	1	0.701	0.113	8.79539e-05	0.00244978	SE	135271528-135271764~135272361-135272478~135277388-135277537
A3SS.1307	ENSMUSG00000003617.16	Cp	chr3	+	0.47	0.246	0.44	0.154	0.14	0.065	0.266	4.50844e-05	0.00245307	A3SS	19973776-19973929~19974858-19974861~19974861-19975058
SE.3475	ENSMUSG00000033530.8	Ttc7b	chr12	-	0.96	1	1	0.948	0.765	1	0.082	8.94314e-05	0.00248149	SE	100332578-100332719~100340496-100340547~100343831-100343993
SE.5712	ENSMUSG00000026950.18	Neb	chr2	-	0.826	0.664	1	1	1	1	-0.17	8.94157e-05	0.00248149	SE	52153682-52153775~52156354-52156447~52159476-52159569
SE.19989	ENSMUSG00000046111.17	Cep295	chr9	-	0.344	0.331	0.227	0.762	0.591	0.606	-0.352	8.93921e-05	0.00248149	SE	15324148-15324291~15325506-15325746~15326074-15326177
SE.8039	ENSMUSG00000028803.18	Nipal3	chr4	-	0	0.049	0.11	0.08	0.403	0.305	-0.21	8.96563e-05	0.0024846	SE	135451885-135452572~135454872-135454904~135463785-135463880
SE.9391	ENSMUSG00000040151.9	Hs2st1	chr3	-	0.101	0.087	0.123	0	0.018	0.021	0.091	8.98902e-05	0.00248794	SE	144465046-144465285~144556949-144557085~144569733-144569881
SE.5950	ENSMUSG00000019907.10	Ppp1r12a	chr10	+	0.751	0.724	0.829	0.907	0.917	0.974	-0.165	9.04185e-05	0.00249942	SE	108252756-108252924~108253324-108253495~108259755-108259846
SE.21536	ENSMUSG00000063015.12	Ccni	chr5	-	0.064	0.092	0.121	0.034	0.012	0.036	0.065	9.20127e-05	0.00254029	SE	93202304-93202462~93205441-93205707~93205913-93206428
SE.11197	ENSMUSG00000026150.14	Mff	chr1	+	0.19	0.291	0.226	0.022	0.052	0.038	0.198	9.27927e-05	0.00255861	SE	82735418-82735507~82745523-82745556~82747082-82747142
RI.2725	ENSMUSG00000074063.10	Osgin1	chr8	+	0	0.036	0.06	0.131	0.222	0.253	-0.17	4.61805e-05	0.002579	RI	119442915-119443107~119442915-119443283~119443191-119443283
RI.630	ENSMUSG00000002055.9	Spag5	chr11	+	0	0	0	0.266	0.055	0.189	-0.17	4.76961e-05	0.00261338	RI	78313512-78313647~78313512-78313939~78313819-78313939
SE.17009	ENSMUSG00000018566.14	Slc2a4	chr11	-	0.981	0.984	0.996	0.97	0.974	0.941	0.025	9.51007e-05	0.00261896	SE	69945837-69945953~69946068-69946193~69946285-69946458
SE.7645	ENSMUSG00000074238.6	Ap1ar	chr3	-	0.546	0.674	0.616	0.808	1	0.875	-0.282	9.5634e-05	0.00263035	SE	127813239-127813295~127815595-127815694~127816909-127817006
SE.12405	ENSMUSG00000035642.16	Aamdc	chr7	-	0.878	0.814	0.97	0.72	0.77	0.512	0.22	9.57626e-05	0.0026306	SE	97550330-97550741~97558130-97558226~97575587-97575653
SE.8107	ENSMUSG00000040270.16	Bach2	chr4	+	0.858	1	1	0.761	0.58	0.909	0.203	9.67387e-05	0.00265409	SE	32317197-32317304~32417434-32417583~32501612-32501636
A3SS.676	ENSMUSG00000032633.12	Flcn	chr11	-	0.193	0.255	0.197	0.324	0.432	0.35	-0.154	4.99924e-05	0.0026724	A3SS	59795140-59795264~59795264-59795575~59795749-59795863
SE.911	ENSMUSG00000024127.15	Prepl	chr17	-	0.426	0.562	0.661	0.244	0.325	0.202	0.293	9.83603e-05	0.00269185	SE	85083192-85083315~85088339-85088442~85090105-85090241
SE.15778	ENSMUSG00000027340.15	Slc23a2	chr2	-	0.887	0.57	0.723	0.842	1	1	-0.221	9.84821e-05	0.00269185	SE	132077428-132077493~132078412-132078501~132089095-132089253
SE.21231	ENSMUSG00000029089.8	5730480H06Rik	chr5	+	0.538	0.492	1	1	1	1	-0.323	9.82848e-05	0.00269185	SE	48379329-48379464~48380123-48380231~48381786-48381867
MXE.1002	ENSMUSG00000019487.11	Trip10	chr17	+	0.059	0.07	0.108	0.033	0.022	0.031	0.05	0.000180959	0.00272926	MXE	57249501-57249571~57250703-57250857;57250954-57251011~57253261-57253402
A3SS.3036	ENSMUSG00000039936.18	Pik3cd	chr4	-	0.579	1	0.662	1	0.831	1	-0.197	5.23223e-05	0.00274873	A3SS	149655335-149655500~149655500-149655503~149655580-149655631
SE.13954	ENSMUSG00000051747.15	Ttn	chr2	-	1	0	1	0.467	0	0.18	0.451	0.000100992	0.00275703	SE	76816988-76817075~76826074-76826152~76831787-76831874
RI.790	ENSMUSG00000029298.15	Gbp9	chr5	-	0.864	0.762	0.643	0.48	0.451	0.314	0.341	5.13419e-05	0.00276105	RI	105082703-105082910~105082703-105083853~105083572-105083853
SE.7877	ENSMUSG00000058388.14	Phtf1	chr3	+	1	1	1	0.772	0.708	0.772	0.249	0.000101551	0.00276823	SE	103987426-103987561~103988614-103988774~103991037-103991127
SE.14290	ENSMUSG00000051747.15	Ttn	chr2	-	0.226	0.331	0.213	0.199	0.123	0.174	0.091	0.000101654	0.00276823	SE	76852056-76852137~76857609-76857690~76857903-76857987
RI.1671	ENSMUSG00000026193.15	Fn1	chr1	-	0.052	0.013	0.052	0.026	0.014	0.029	0.016	5.26053e-05	0.00277756	RI	71597280-71597747~71597280-71598463~71598373-71598463
RI.2276	ENSMUSG00000070034.13	Sp110	chr1	-	1	1	0.694	0.321	1	0.574	0.266	5.37045e-05	0.00278496	RI	85579056-85579199~85579056-85579745~85579643-85579745
RI.120	ENSMUSG00000002668.8	Dennd1c	chr17	-	1	0.54	1	0.369	1	0.227	0.315	5.64034e-05	0.00279289	RI	57066731-57066942~57066731-57067116~57067048-57067116
RI.2415	ENSMUSG00000042918.17	Mamstr	chr7	+	0.286	0.273	0.256	0.566	0.553	0.38	-0.228	5.67426e-05	0.00279289	RI	45642747-45642929~45642747-45643324~45643236-45643324
RI.2561	ENSMUSG00000025473.16	Adam8	chr7	-	0.789	1	1	0.68	0.476	0.288	0.448	5.51e-05	0.00279289	RI	139987178-139987268~139987178-139987737~139987559-139987737
A5SS.519	ENSMUSG00000029166.14	Mapre3	chr5	+	0.774	0.849	0.79	0.713	0.609	0.513	0.193	5.14802e-05	0.00281893	A5SS	30863203-30863360~30863360-30863405~30864573-30864728
A3SS.1987	ENSMUSG00000032212.10	Sltm	chr9	+	0.495	0.688	0.688	1	1	1	-0.376	5.5151e-05	0.00284822	A3SS	70572148-70572176~70573456-70573510~70573510-70573925
SE.6709	ENSMUSG00000037523.13	Mavs	chr2	+	0.892	0.757	0.857	0.539	0.728	0.629	0.203	0.00010482	0.0028509	SE	131238735-131238910~131240314-131240492~131241879-131242049
SE.6162	ENSMUSG00000024845.17	Tmem134	chr19	+	0.916	0.887	0.938	0.977	0.963	0.989	-0.063	0.000105393	0.00286293	SE	4127549-4127639~4127759-4127836~4131228-4131282
MXE.543	ENSMUSG00000026950.18	Neb	chr2	-	0.288	0.293	0.26	0.368	0.307	0.405	-0.08	0.000192124	0.00286437	MXE	52149093-52149277~52149589-52149697;52160655-52160748~52161370-52161475
MXE.1395	ENSMUSG00000060227.15	Casc4	chr2	+	0.067	0	0.212	0.403	0.077	0.282	-0.161	0.000192519	0.00286437	MXE	121905929-121906071~121906697-121906778;121910798-121910897~121911870-121912041
MXE.754	ENSMUSG00000029862.16	Clcn1	chr6	+	0.328	0.344	0.379	0.087	0.114	0.263	0.196	0.000194885	0.00288011	MXE	42292940-42293018~42294077-42294156;42298798-42298924~42299237-42299322
SE.19980	ENSMUSG00000036501.7	Fam13b	chr18	-	0.901	1	1	0.959	0.549	0.78	0.204	0.000107321	0.00291171	SE	34445531-34445615~34448025-34448121~34448367-34448451
SE.6798	ENSMUSG00000024392.17	Bag6	chr17	+	0.766	0.763	0.669	0.828	0.838	0.885	-0.118	0.000107826	0.00291821	SE	35146245-35146353~35146756-35146903~35147140-35147305
SE.15979	ENSMUSG00000029513.14	Prkab1	chr5	-	0.952	1	0.944	0.845	0.88	0.811	0.12	0.000107814	0.00291821	SE	116017814-116018081~116020003-116020118~116020373-116020467
SE.9951	ENSMUSG00000031734.13	Irx3	chr8	-	0.942	1	0.567	1	1	1	-0.164	0.000108298	0.00292737	SE	91799410-91799477~91799658-91800798~91800964-91801915
SE.1662	ENSMUSG00000045983.16	Eif4g1	chr16	+	1	0.995	0.991	0.983	0.959	0.963	0.027	0.000108552	0.00293063	SE	20672822-20672876~20674227-20674314~20675343-20675433
SE.6182	ENSMUSG00000054099.11	Slc25a40	chr5	+	0.67	1	1	0.336	0.448	0.67	0.405	0.0001089	0.00293284	SE	8422849-8423039~8427195-8427267~8427407-8427516
SE.17160	ENSMUSG00000030016.14	Zfp638	chr6	+	1	0.373	0	1	1	1	-0.542	0.00010883	0.00293284	SE	83976201-83976350~83981683-83981785~83983975-83984074
SE.1651	ENSMUSG00000022847.15	Thpo	chr16	-	0.883	0.798	0.654	1	0.942	0.965	-0.191	0.000109484	0.00294496	SE	20728381-20728468~20728718-20728846~20729063-20729217
SE.20856	ENSMUSG00000032185.15	Carm1	chr9	+	0.056	0.02	0.022	0.08	0.076	0.125	-0.061	0.000109646	0.00294569	SE	21574486-21574593~21574893-21575093~21575413-21575518
SE.10825	ENSMUSG00000028180.18	Zranb2	chr3	+	0.848	0.965	0.889	1	1	1	-0.099	0.000110546	0.00296264	SE	157536333-157536386~157536447-157536586~157537586-157537669
SE.13602	ENSMUSG00000052337.15	Immt	chr6	+	0.005	0.008	0.008	0.025	0.018	0.044	-0.022	0.000110441	0.00296264	SE	71851771-71851880~71852729-71852867~71856911-71857048
SE.9952	ENSMUSG00000031734.13	Irx3	chr8	-	0.95	1	0.611	1	1	1	-0.146	0.00011109	0.00297357	SE	91799410-91799477~91799672-91800798~91800964-91802067
SE.15821	ENSMUSG00000039286.12	Fndc3b	chr3	-	0.569	0	0.248	0.726	0.398	1	-0.436	0.000111351	0.00297695	SE	27642950-27643089~27682737-27682814~27710370-27710398
SE.12497	ENSMUSG00000027365.14	Trpm7	chr2	-	0.927	1	0.967	0.813	0.828	0.817	0.145	0.00011162	0.00298052	SE	126844299-126844474~126846073-126846245~126848496-126848621
A5SS.61	ENSMUSG00000033460.14	Armcx1	chrX	+	1	1	1	0.693	0.22	0.361	0.575	5.78231e-05	0.00298532	A5SS	134718919-134718992~134718992-134719108~134719626-134719725
A5SS.1129	ENSMUSG00000013622.15	Atraid	chr5	+	0.939	1	0.824	0.973	0.99	0.989	-0.063	5.73104e-05	0.00298532	A5SS	31049461-31049483~31049483-31049580~31052196-31052268
SE.8086	ENSMUSG00000034035.18	Ccdc17	chr4	+	0.365	1	1	0	0	1	0.455	0.000112834	0.00300928	SE	116599288-116599490~116599556-116599667~116599886-116600201
SE.14074	ENSMUSG00000051747.15	Ttn	chr2	-	0.861	0.792	0.715	0.911	0.944	0.986	-0.158	0.000113696	0.00302859	SE	76822450-76822564~76840232-76840313~76847387-76847471
SE.690	ENSMUSG00000024617.16	Camk2a	chr18	+	0.991	0.983	0.993	0.961	0.934	0.933	0.046	0.00011494	0.00305802	SE	60963553-60963963~60969010-60969043~60969993-60970042
MXE.1351	ENSMUSG00000061462.18	Obscn	chr11	-	0.789	0.81	0.819	0.727	0.767	0.714	0.07	0.000208354	0.00305863	MXE	59061423-59061687~59062030-59062294;59064186-59064450~59067065-59067329
A5SS.1065	ENSMUSG00000030980.17	Knop1	chr7	-	1	1	0.868	0.88	0.496	0.868	0.208	6.29953e-05	0.00307655	A5SS	118850620-118850689~118852402-118852888~118852888-118853340
A5SS.1284	ENSMUSG00000029478.16	Ncor2	chr5	-	0.373	0.331	0.349	0.516	0.485	0.553	-0.167	6.29278e-05	0.00307655	A5SS	125026801-125027217~125028611-125028620~125028620-125028798
SE.1812	ENSMUSG00000008658.16	Rbfox1	chr16	+	1	0.98	0.992	0.979	0.907	0.955	0.044	0.000116277	0.00308984	SE	7306407-7306461~7330361-7330442~7352931-7353045
SE.10216	ENSMUSG00000032913.13	Lrig2	chr3	-	0.801	1	1	0.671	0.632	0.763	0.245	0.000116552	0.00309342	SE	104461400-104461688~104462658-104462787~104463858-104464308
SE.7667	ENSMUSG00000053819.16	Camk2d	chr3	+	0.347	0.46	0.439	0.165	0.238	0.153	0.23	0.000117439	0.0031132	SE	126805856-126805916~126808207-126808249~126810638-126810687
SE.11191	ENSMUSG00000026150.14	Mff	chr1	+	0.815	0.818	0.716	0.862	0.941	0.918	-0.124	0.000118956	0.00314962	SE	82735418-82735507~82737012-82737087~82741817-82741976
SE.13269	ENSMUSG00000061462.18	Obscn	chr11	-	0.839	0.693	0.832	0.94	0.934	0.92	-0.143	0.000119304	0.00315504	SE	59061423-59061687~59062646-59062910~59064186-59064450
SE.21402	ENSMUSG00000022744.12	Cldnd1	chr16	+	0.017	0.094	0.128	0.013	0.021	0	0.068	0.000120226	0.00317559	SE	58728047-58728084~58729157-58729223~58729437-58729747
SE.4167	ENSMUSG00000020694.17	Tlk2	chr11	+	0.861	0.436	0.481	1	1	0.844	-0.355	0.000121989	0.0032177	SE	105208851-105208921~105209793-105209837~105221185-105221353
SE.12774	ENSMUSG00000006542.13	Prkag3	chr1	-	0.985	0.978	1	0.982	0.599	0.936	0.149	0.000122113	0.0032177	SE	74747871-74748024~74748471-74748511~74748817-74748867
SE.394	ENSMUSG00000025006.18	Sorbs1	chr19	-	0.788	0.867	0.611	0.89	0.882	0.938	-0.148	0.000124233	0.00326963	SE	40373475-40373617~40376644-40377016~40382520-40382633
SE.7643	ENSMUSG00000030035.14	Wbp1	chr6	-	0.63	0.652	0.739	0.924	0.85	1	-0.251	0.000124571	0.00327462	SE	83120184-83120287~83120771-83120873~83121202-83121387
SE.12686	ENSMUSG00000020124.10	Usp15	chr10	-	1	0.972	1	0.968	0.918	0.886	0.067	0.000124955	0.00327687	SE	123146793-123146938~123163592-123163654~123168226-123168372
SE.20158	ENSMUSG00000029769.16	Ccdc136	chr6	+	1	1	1	0.847	0.759	0.966	0.143	0.000124895	0.00327687	SE	29412901-29413087~29417071-29417578~29426624-29426857
SE.14935	ENSMUSG00000024038.17	Ndufv3	chr17	+	0.013	0.014	0.011	0.023	0.015	0.026	-0.009	0.000125923	0.00329831	SE	31521568-31521692~31527309-31528401~31531109-31531331
SE.5466	ENSMUSG00000029550.11	Sppl3	chr5	+	0	0	0	0.025	0.108	0.036	-0.056	0.000126419	0.00330736	SE	115011145-115011615~115020733-115020871~115061561-115061601
SE.14083	ENSMUSG00000051747.15	Ttn	chr2	-	0.056	0.079	0.058	0.143	0.039	0.141	-0.043	0.000127021	0.00331736	SE	76831787-76831874~76840232-76840313~76847387-76847471
SE.15985	ENSMUSG00000061887.14	Ssbp3	chr4	+	0.09	0.14	0.029	0.291	0.146	0.256	-0.145	0.000127103	0.00331736	SE	107009678-107009768~107027216-107027297~107028192-107028252
SE.7254	ENSMUSG00000066735.8	Vkorc1l1	chr5	+	0.204	0.366	0.182	0.092	0	0	0.22	0.000128984	0.00336246	SE	129941969-129942365~129978518-129978628~129982140-129982241
SE.6623	ENSMUSG00000028649.21	Macf1	chr4	-	0.513	0.455	0.472	0.723	0.645	0.877	-0.268	0.000131706	0.00342934	SE	123360909-123361027~123364056-123364074~123365272-123365347
SE.21064	ENSMUSG00000032058.14	Ppp2r1b	chr9	+	0.135	0.632	0.186	0	0.022	0	0.31	0.000132162	0.00343716	SE	50870083-50870236~50873196-50873308~50873646-50873707
SE.14981	ENSMUSG00000055013.16	Agap1	chr1	+	0.112	0.134	0	0.239	0.481	0.181	-0.218	0.000132622	0.00344505	SE	89609495-89609583~89610283-89610295~89627760-89627846
RI.1120	ENSMUSG00000064068.15	Mtx1	chr3	-	0.335	0.12	0.16	0.017	0.061	0.024	0.171	7.23406e-05	0.00350128	RI	89210106-89210183~89210106-89210448~89210265-89210448
SE.2227	ENSMUSG00000022197.16	Pdzd2	chr15	-	1	1	1	0.786	0.746	0.942	0.175	0.000135066	0.00350437	SE	12419457-12419572~12437103-12437259~12457797-12458299
SE.3976	ENSMUSG00000025137.15	Pcyt2	chr11	-	0.367	0.468	0.361	0.816	0.673	0.81	-0.368	0.000136948	0.00354901	SE	120612204-120612601~120612845-120613083~120613378-120613423
SE.13320	ENSMUSG00000061462.18	Obscn	chr11	-	0.514	0.679	0.413	0.679	1	1	-0.358	0.000138674	0.00358951	SE	59107741-59108017~59112518-59112794~59128062-59128338
SE.11910	ENSMUSG00000009995.17	Taz	chrX	+	0.09	0.042	0.123	0	0	0	0.085	0.000139156	0.00359775	SE	74288661-74288714~74288983-74289019~74289104-74289182
SE.3341	ENSMUSG00000021285.15	Ppp1r13b	chr12	-	0.164	0.407	0.352	0.128	0	0.033	0.254	0.000140444	0.00362678	SE	111835612-111835776~111837001-111837106~111838600-111838781
SE.1395	ENSMUSG00000022965.8	Ifngr2	chr16	+	1	1	0.984	0.95	0.95	0.963	0.04	0.000141046	0.00363806	SE	91547071-91547232~91554947-91555080~91557884-91558078
SE.11347	ENSMUSG00000037795.14	N4bp2	chr5	+	0.79	1	1	0.781	0.403	1	0.202	0.000142978	0.00368358	SE	65775584-65775663~65788052-65788141~65790017-65791170
SE.20746	ENSMUSG00000025812.18	Pard3	chr8	+	0.198	0.278	0.262	0.023	0.204	0	0.17	0.000143894	0.00370282	SE	127409555-127409707~127410728-127410773~127415569-127415797
MXE.567	ENSMUSG00000026950.18	Neb	chr2	-	0.018	0.018	0.023	0.008	0.012	0.011	0.009	0.000257639	0.0037571	MXE	52150966-52151059~52151363-52151456;52153682-52153775~52157290-52157383
SE.14006	ENSMUSG00000051747.15	Ttn	chr2	-	0.979	0.976	1	0.75	0.786	1	0.14	0.000146574	0.00376739	SE	76816988-76817075~76831787-76831874~76857903-76857987
SE.1933	ENSMUSG00000036167.16	Pphln1	chr15	+	0.299	0.458	0.319	0.031	0.162	0.121	0.254	0.000147	0.00377391	SE	93441500-93441712~93452116-93452173~93455450-93455530
SE.1515	ENSMUSG00000035258.15	Abi3bp	chr16	+	0.245	1	0.245	1	1	0.722	-0.411	0.000149569	0.00383252	SE	56647024-56647099~56652136-56652217~56657265-56657331
SE.11346	ENSMUSG00000037795.14	N4bp2	chr5	+	0.649	1	1	0.663	0.254	1	0.244	0.000149632	0.00383252	SE	65775584-65775663~65786105-65786361~65790017-65791170
SE.9072	ENSMUSG00000030409.16	Dmpk	chr7	+	0.855	0.898	0.88	0.977	0.947	0.979	-0.09	0.000150441	0.00384876	SE	19091938-19092036~19092207-19092254~19092949-19093044
RI.1794	ENSMUSG00000026869.12	Psmd5	chr2	-	0.109	0.077	0.077	0.027	0.027	0.037	0.057	8.12173e-05	0.00386648	RI	34856447-34856557~34856447-34857829~34857637-34857829
SE.20999	ENSMUSG00000032010.15	Usp2	chr9	+	0.115	0.19	0.048	0.101	0.038	0.009	0.068	0.0001522	0.00388924	SE	44067077-44067220~44068037-44068295~44075365-44076222
SE.20725	ENSMUSG00000002052.6	Supt6	chr11	-	0.037	0.148	0.105	0.015	0	0.025	0.083	0.000153104	0.00390779	SE	78219882-78220090~78220596-78220747~78221120-78221248
SE.18462	ENSMUSG00000039007.10	Cpq	chr15	+	0.042	0	0.015	0.08	0.11	0.098	-0.077	0.000154381	0.00393582	SE	33083255-33083322~33090298-33090494~33212815-33213181
SE.10827	ENSMUSG00000028180.18	Zranb2	chr3	+	0.853	0.967	0.899	1	1	1	-0.094	0.000155318	0.00395512	SE	157536333-157536386~157536482-157536586~157537586-157537669
SE.3630	ENSMUSG00000021065.16	Fut8	chr12	+	0.896	0.905	0.832	0.656	0.517	0.776	0.228	0.000156297	0.00397544	SE	77277360-77277455~77323844-77323937~77331895-77332329
A5SS.1345	ENSMUSG00000029925.13	Tbxas1	chr6	+	1	1	1	0.5	0.506	0.434	0.52	8.39017e-05	0.00398975	A5SS	39080938-39081076~39081076-39083855~39084295-39084585
MXE.35	ENSMUSG00000025006.18	Sorbs1	chr19	-	0.133	0.12	0.101	0.068	0.072	0.084	0.043	0.000277541	0.0039916	MXE	40373475-40373617~40376644-40377016;40377653-40378379~40382520-40382633
MXE.377	ENSMUSG00000021000.17	Mia2	chr12	+	0.064	0	0.132	0.297	0.138	0.21	-0.15	0.000279158	0.0039916	MXE	59137697-59137786~59144698-59144770;59146335-59146362~59146846-59146957
MXE.918	ENSMUSG00000041890.17	Git2	chr5	-	0.12	0.161	0.081	0.262	0.261	0.272	-0.144	0.000277416	0.0039916	MXE	114733860-114733943~114739032-114739281;114743775-114743880~114745428-114745571
SE.17726	ENSMUSG00000015766.14	Eps8	chr6	-	0.917	1	0.796	0.854	0.635	0.14	0.361	0.000159838	0.00406081	SE	137537617-137537694~137539321-137539401~137591417-137591492
SE.3442	ENSMUSG00000041415.10	Dicer1	chr12	-	0.561	0.533	0.519	0.79	0.725	0.814	-0.239	0.000160445	0.00407153	SE	104731019-104731182~104731799-104731987~104737768-104737866
SE.7448	ENSMUSG00000028402.18	Mpdz	chr4	-	0.956	0.943	0.953	0.898	0.934	0.745	0.092	0.000161399	0.00409101	SE	81356329-81356497~81358625-81358742~81360003-81360213
SE.21333	ENSMUSG00000034252.14	Senp6	chr9	+	0.727	0.777	0.931	0.913	1	1	-0.159	0.000163146	0.00413052	SE	80066902-80067572~80087429-80087523~80089848-80089906
SE.7897	ENSMUSG00000056367.14	Actr3b	chr5	+	0.505	0.803	0.803	1	1	1	-0.296	0.000164128	0.00415061	SE	25825107-25825215~25829525-25829669~25831610-25831784
SE.11142	ENSMUSG00000038685.18	Rtel1	chr2	+	0.771	1	1	0.296	0	1	0.492	0.000165081	0.00416991	SE	181354352-181354442~181355008-181355125~181355309-181355552
SE.14322	ENSMUSG00000051747.15	Ttn	chr2	-	0.843	0.853	0.764	0.887	0.824	0.937	-0.063	0.000165472	0.00417498	SE	76857903-76857987~76861422-76861509~76862111-76862189
SE.14118	ENSMUSG00000051747.15	Ttn	chr2	-	0.804	0.622	1	1	1	1	-0.191	0.000165703	0.00417603	SE	76831787-76831874~76841767-76841836~76850305-76850380
SE.1970	ENSMUSG00000036561.9	Ppp6r2	chr15	+	0.239	0.348	0.329	0.145	0.242	0.115	0.138	0.000166201	0.00418376	SE	89278698-89278784~89279272-89279353~89279719-89279817
SE.10217	ENSMUSG00000032913.13	Lrig2	chr3	-	0.833	1	1	0.75	0.655	0.81	0.206	0.000166685	0.00419115	SE	104461400-104461688~104462658-104462808~104463858-104464308
SE.21389	ENSMUSG00000022263.10	Trio	chr15	-	1	1	1	0.922	0.879	0.866	0.111	0.000167606	0.00420949	SE	27743952-27744200~27747920-27748142~27748459-27748551
SE.12493	ENSMUSG00000027365.14	Trpm7	chr2	-	0.038	0	0.042	0.249	0.053	0.112	-0.111	0.000171862	0.00431145	SE	126799312-126799363~126800288-126800337~126801122-126801148
SE.15258	ENSMUSG00000014778.10	Fhod1	chr8	-	0.668	0.76	0.721	0.365	0.161	0.341	0.427	0.000172235	0.0043159	SE	105334686-105334802~105336236-105336260~105336381-105336561
SE.18452	ENSMUSG00000029267.17	Mtf2	chr5	+	0	0.698	1	0	0	0	0.566	0.000172748	0.0043238	SE	108073306-108073454~108078865-108078974~108080824-108081023
SE.11543	ENSMUSG00000057738.14	Sptan1	chr2	+	0	0	0.012	0.039	0.035	0.098	-0.053	0.000173235	0.00433107	SE	29965679-29965785~29968775-29968826~29978376-29978616
A5SS.1305	ENSMUSG00000037017.15	Zscan21	chr5	+	0.262	0.64	0.571	0.756	1	1	-0.428	9.45756e-05	0.004382	A5SS	138116936-138116988~138116988-138117007~138124977-138125690
SE.13289	ENSMUSG00000061462.18	Obscn	chr11	-	0.597	0.76	1	0.864	1	1	-0.169	0.000177759	0.00443913	SE	59085064-59085340~59086664-59086940~59099689-59099965
RI.1787	ENSMUSG00000070003.7	Ssbp4	chr8	-	0.391	0.161	0.08	0.616	0.498	0.512	-0.331	9.48619e-05	0.00444321	RI	70598538-70598617~70598538-70598772~70598701-70598772
RI.1658	ENSMUSG00000049339.16	Retreg2	chr1	+	1	1	1	0.962	0.855	0.894	0.096	9.7006e-05	0.00447152	RI	75146429-75146719~75146429-75147909~75146830-75147909
RI.987	ENSMUSG00000028453.10	Fancg	chr4	-	0.331	1	1	0.271	0	0.248	0.604	0.00010328	0.00447648	RI	43006983-43007114~43006983-43007403~43007267-43007403
RI.1353	ENSMUSG00000020974.6	Pole2	chr12	-	1	1	0.342	0.148	0.148	0.258	0.596	0.000102262	0.00447648	RI	69212222-69212271~69212222-69213043~69212986-69213043
RI.2300	ENSMUSG00000012848.15	Rps5	chr7	+	0.014	0.012	0.015	0.016	0.02	0.039	-0.011	0.000101282	0.00447648	RI	12925736-12925865~12925736-12926494~12926395-12926494
RI.2344	ENSMUSG00000061028.7	Clasrp	chr7	-	0.853	0.906	1	0.604	0.741	0.646	0.256	0.000100515	0.00447648	RI	19591992-19592077~19591992-19594552~19594472-19594552
RI.262	ENSMUSG00000003526.12	Prodh	chr16	-	0.3	0.562	1	1	1	0.873	-0.337	0.000106495	0.00448205	RI	18077443-18077590~18077443-18077883~18077790-18077883
RI.1797	ENSMUSG00000026883.17	Dab2ip	chr2	+	0.906	0.864	0.927	0.845	0.794	0.719	0.113	0.00010598	0.00448205	RI	35728057-35728128~35728057-35730994~35729110-35730994
SE.5220	ENSMUSG00000036676.14	Tmtc3	chr10	-	1	1	1	1	0.679	1	0.107	0.000180206	0.00449003	SE	100466020-100466273~100471328-100471501~100474374-100474474
SE.14035	ENSMUSG00000051747.15	Ttn	chr2	-	0.562	0.428	0.529	0.364	0.25	0.19	0.238	0.000180169	0.00449003	SE	76831787-76831874~76832100-76832184~76838811-76838895
A5SS.311	ENSMUSG00000021134.17	Srsf5	chr12	+	0.664	0.709	0.79	0.875	0.917	0.836	-0.155	0.000105195	0.0045074	A5SS	80945531-80945668~80945668-80945672~80946575-80946720
A5SS.1073	ENSMUSG00000037703.14	Lzts3	chr2	-	1	0.846	1	0.67	1	0.533	0.214	0.000103311	0.0045074	A5SS	130635772-130636627~130636942-130637284~130637284-130637419
A5SS.1207	ENSMUSG00000011658.16	Fuz	chr7	+	0.922	0.907	0.893	0.734	0.647	0.474	0.289	0.000105936	0.0045074	A5SS	44897519-44897624~44897624-44898700~44898775-44898871
A5SS.1388	ENSMUSG00000068329.12	Htra2	chr6	-	0.91	1	1	0.754	0.718	0.905	0.178	0.00010726	0.0045074	A5SS	83052472-83052542~83052697-83053037~83053037-83053070
SE.18780	ENSMUSG00000011877.13	Git1	chr11	+	0.025	0	0.025	0.102	0.041	0.097	-0.063	0.000182001	0.00452961	SE	77500987-77501114~77502828-77502855~77503017-77503066
SE.15196	ENSMUSG00000050211.14	Pla2g4e	chr2	-	1	1	1	0.763	0.804	0.779	0.218	0.000185161	0.00460306	SE	120200212-120200285~120207129-120207235~120209812-120209923
SE.5880	ENSMUSG00000037720.16	Tmem33	chr5	+	0.881	0.868	0.937	0.983	1	0.974	-0.09	0.000185668	0.00460524	SE	67267301-67267369~67268510-67268644~67284139-67284223
SE.12327	ENSMUSG00000039844.20	Rapgef1	chr2	+	0.93	0.936	0.98	0.996	0.968	0.995	-0.038	0.000185462	0.00460524	SE	29707197-29707400~29710152-29710308~29719592-29719850
SE.21577	ENSMUSG00000032497.19	Lrrfip2	chr9	+	0	0	0	0.178	0	0.115	-0.098	0.000187374	0.00464231	SE	111161302-111161389~111173080-111173122~111188761-111188806
SE.16238	ENSMUSG00000060261.15	Gtf2i	chr5	-	0.319	0.223	0.215	0.413	0.375	0.545	-0.192	0.000188816	0.00466751	SE	134266542-134266656~134272523-134272586~134274538-134274595
SE.16631	ENSMUSG00000030556.13	Lrrc28	chr7	-	0.462	0.42	0.334	0.596	0.779	0.66	-0.273	0.00018874	0.00466751	SE	67545365-67545468~67559857-67559969~67617992-67618130
SE.13442	ENSMUSG00000033335.17	Dnm2	chr9	+	0.063	0.144	0.113	0.293	0.166	0.565	-0.235	0.000189283	0.0046738	SE	21478898-21479037~21480406-21480545~21481332-21481419
A5SS.1048	ENSMUSG00000063047.9	Zfp780b	chr7	-	0.649	0.104	0.536	0	0	0.144	0.382	0.000113881	0.00467691	A5SS	27974752-27974805~27976739-27976751~27976751-27976833
MXE.76	ENSMUSG00000024294.14	Mib1	chr18	+	0.456	0.423	0.606	0.677	0.708	0.765	-0.222	0.000331457	0.00470882	MXE	10778148-10778300~10792894-10793027;10794477-10794564~10795689-10795851
SE.2701	ENSMUSG00000025290.17	Rps24	chr14	+	0.434	0.831	0.711	0.222	0.263	0.263	0.409	0.000193059	0.00476169	SE	24493382-24493493~24494051-24494069~24495774-24495845
SE.4560	ENSMUSG00000020821.17	Kif1c	chr11	+	0.376	0.342	0.409	0.443	0.542	0.466	-0.108	0.00019407	0.00477591	SE	70700649-70700709~70702431-70702551~70702771-70702905
SE.20042	ENSMUSG00000025981.13	Coq10b	chr1	+	0.988	1	0.98	0.945	0.892	0.942	0.063	0.000193957	0.00477591	SE	55052769-55052990~55061274-55061424~55064180-55064373
SE.14073	ENSMUSG00000051747.15	Ttn	chr2	-	1	1	1	0.954	0.707	0.972	0.122	0.000195175	0.00479772	SE	76818735-76818816~76840232-76840313~76847387-76847471
SE.10218	ENSMUSG00000032913.13	Lrig2	chr3	-	0.728	1	1	0.672	0.536	0.743	0.259	0.000195913	0.00481048	SE	104461400-104461688~104462658-104462845~104463858-104464308
SE.12387	ENSMUSG00000027534.16	Snx16	chr3	-	1	0.833	1	0.859	1	0.486	0.163	0.000196676	0.00482384	SE	10418145-10419223~10420196-10420316~10420739-10420876
SE.8819	ENSMUSG00000014444.17	Piezo1	chr8	-	0	0.321	0	0.761	0.78	0.261	-0.494	0.000197255	0.00483243	SE	122489098-122489199~122489554-122489616~122490062-122490163
SE.16832	ENSMUSG00000008140.18	Emc10	chr7	-	0.137	0.202	0.153	0.516	0.271	0.388	-0.228	0.000197517	0.00483243	SE	44490110-44490970~44491162-44491249~44491954-44492048
SE.17768	ENSMUSG00000031712.10	Il15	chr8	-	0.725	1	0.769	0.853	1	1	-0.12	0.000197686	0.00483243	SE	82379488-82379615~82402738-82402873~82402968-82403209
SE.1892	ENSMUSG00000023021.15	Cers5	chr15	-	0	0.061	0	0.147	0	0.113	-0.066	0.000198294	0.00484191	SE	99734880-99736436~99737546-99737653~99738664-99738730
SE.20621	ENSMUSG00000014633.15	Cmc2	chr8	-	0.777	0.91	0.865	1	0.915	1	-0.121	0.000199284	0.00486068	SE	116888684-116889859~116894087-116894159~116911127-116911234
SE.16424	ENSMUSG00000001844.10	Zdhhc4	chr5	-	0.258	0.176	0.242	0.143	0.082	0.022	0.143	0.00020008	0.00487467	SE	143328390-143328570~143328677-143328897~143329165-143329228
MXE.36	ENSMUSG00000025006.18	Sorbs1	chr19	-	0.745	0.916	0.885	0.447	0.635	0.581	0.294	0.000350531	0.00488641	MXE	40373475-40373617~40376983-40377016;40377653-40378379~40382520-40382633
MXE.1334	ENSMUSG00000061462.18	Obscn	chr11	-	0.241	0.308	0.376	0.46	0.356	0.53	-0.14	0.000350614	0.00488641	MXE	59052444-59052711~59053573-59053837;59064186-59064450~59067065-59067329
MXE.1821	ENSMUSG00000038696.14	Mapkap1	chr2	+	0	0	0	0.132	0.016	0.092	-0.08	0.000348929	0.00488641	MXE	34533787-34533897~34581191-34581332;34597422-34597560~34619844-34619942
SE.1328	ENSMUSG00000014767.17	Tbp	chr17	+	0.201	0	0	0.392	0.376	0.43	-0.332	0.000201249	0.00489773	SE	15499887-15500024~15501153-15501202~15502964-15503128
MXE.386	ENSMUSG00000037989.15	Wnk2	chr13	-	0.496	0.514	0.404	0.568	0.654	0.697	-0.168	0.000357256	0.00494766	MXE	49044373-49044418~49050483-49050582;49051356-49051527~49052558-49052773
SE.15765	ENSMUSG00000033423.16	Eri3	chr4	+	0.992	0.97	1	0.931	0.979	0.907	0.048	0.000205089	0.00498567	SE	117552609-117553043~117564620-117564898~117582599-117582716
SE.6320	ENSMUSG00000071042.12	Rasgrp3	chr17	+	0.537	0.654	0.504	0.261	0.317	0.284	0.278	0.000206085	0.00500433	SE	75435895-75436168~75488816-75488949~75491757-75491790
SE.5415	ENSMUSG00000045098.19	Kmt5b	chr19	+	1	1	0.954	0.914	0.827	0.919	0.098	0.000206622	0.00501183	SE	3768021-3768340~3786388-3786627~3793067-3793167
SE.7578	ENSMUSG00000028268.14	Gbp3	chr3	+	1	1	0.685	1	0.465	0.225	0.332	0.000207463	0.00502669	SE	142560025-142560283~142560495-142560690~142561739-142561935
SE.226	ENSMUSG00000073139.9	Tmem185a	chrX	-	0.889	0.929	0.889	1	1	1	-0.098	0.000208558	0.00504211	SE	70462844-70463021~70465002-70465086~70467153-70467203
SE.17127	ENSMUSG00000068329.12	Htra2	chr6	-	0.958	1	1	0.804	0.85	0.934	0.123	0.000208537	0.00504211	SE	83052472-83052542~83052697-83052803~83053037-83053070
SE.15962	ENSMUSG00000022723.16	Crybg3	chr16	-	0.695	0.804	0.759	0.891	0.891	1	-0.175	0.000209156	0.00505099	SE	59524860-59524970~59529222-59529255~59530103-59530191
RI.2762	ENSMUSG00000032180.11	Tmed1	chr9	-	0.178	0.182	0.147	0.055	0.027	0.049	0.125	0.000122073	0.00506429	RI	21508930-21509114~21508930-21509351~21509253-21509351
MXE.1438	ENSMUSG00000051747.15	Ttn	chr2	-	0.047	0.035	0.047	0.008	0	0	0.04	0.000368303	0.00506876	MXE	76818735-76818816~76821115-76821184;76826446-76826542~76831787-76831874
SE.1758	ENSMUSG00000018830.10	Myh11	chr16	-	0.805	0.888	0.79	0.687	0.467	0.467	0.287	0.000213088	0.00514031	SE	14246726-14246819~14248579-14248600~14250521-14250624
SE.12182	ENSMUSG00000035495.15	Tstd2	chr4	-	0.018	0.031	0	0.045	0.124	0.13	-0.083	0.000214879	0.00517782	SE	46132145-46132156~46133381-46133655~46135386-46135778
SE.15328	ENSMUSG00000011658.16	Fuz	chr7	+	0.967	0.964	0.966	0.883	0.877	0.788	0.116	0.000215481	0.00518665	SE	44897519-44897624~44898502-44898700~44898775-44898789
MXE.2199	ENSMUSG00000010461.15	Eya4	chr10	-	0.641	0.309	0.366	0.145	0.06	0.19	0.307	0.000380677	0.00520653	MXE	23226801-23226851~23323047-23323146;23349761-23349890~23350662-23350786
SE.940	ENSMUSG00000024074.8	Crim1	chr17	+	0.816	1	1	0.564	0.608	0.847	0.266	0.000217245	0.0052071	SE	78237771-78237915~78281245-78281366~78313123-78313306
SE.7522	ENSMUSG00000028188.13	Spata1	chr3	-	0.857	1	0.521	0.475	0.179	0.475	0.416	0.000216991	0.0052071	SE	146469624-146469803~146475255-146475381~146476193-146476302
SE.14141	ENSMUSG00000051747.15	Ttn	chr2	-	1	0.98	0.962	0.987	0.844	0.906	0.068	0.000217278	0.0052071	SE	76842770-76842848~76843375-76843492~76847387-76847471
SE.16064	ENSMUSG00000029528.19	Pxn	chr5	+	0.949	0.893	0.893	0.797	0.876	0.583	0.16	0.000217123	0.0052071	SE	115546812-115546948~115548281-115549112~115551487-115551589
SE.19160	ENSMUSG00000047767.17	Atg16l2	chr7	-	1	1	1	0.75	1	0.545	0.235	0.000218119	0.00522154	SE	101299005-101299108~101300111-101300211~101301900-101302027
SE.17626	ENSMUSG00000038696.14	Mapkap1	chr2	+	0.951	1	1	0.98	0.846	0.818	0.102	0.000218502	0.00522503	SE	34497700-34497873~34518672-34518849~34533787-34533897
SE.1640	ENSMUSG00000033653.18	Vps8	chr16	+	1	1	1	0.875	1	0.405	0.24	0.000219379	0.0052403	SE	21506769-21506821~21511518-21511561~21517282-21517355
SE.8731	ENSMUSG00000034684.12	Sema3f	chr9	-	0.292	0.093	0	0.188	1	0.622	-0.475	0.000220531	0.00526209	SE	107689685-107689779~107691355-107691448~107692167-107692287
MXE.2196	ENSMUSG00000021820.18	Camk2g	chr14	-	0.212	0.182	0.296	0.486	0.39	0.311	-0.166	0.000391554	0.00532224	MXE	20744603-20744648~20745791-20745860;20747818-20747851~20755658-20755702
SE.7481	ENSMUSG00000039068.16	Zzz3	chr3	+	0.74	0	1	1	0	0	0.247	0.000224965	0.00535625	SE	152422617-152422771~152446628-152446689~152446798-152446937
SE.18552	ENSMUSG00000004609.11	Cd33	chr7	-	0	0.177	0	0.074	0.474	0.177	-0.183	0.000224724	0.00535625	SE	43527994-43529008~43529472-43529555~43529865-43529932
MXE.510	ENSMUSG00000090841.2	Myl6	chr10	-	0.858	0.841	1	0.584	0.716	0.56	0.28	0.000397845	0.00537457	MXE	128492601-128492745~128492938-128493045;128493333-128493353~128493538-128493566
SE.9443	ENSMUSG00000055296.14	Tmem245	chr4	-	0.059	0.175	0.031	0.039	0	0	0.075	0.000226448	0.00538573	SE	56899305-56899428~56903211-56903247~56903917-56904049
MXE.908	ENSMUSG00000026743.16	Mllt10	chr2	+	0.21	0.383	0.544	0.118	0.047	0.135	0.279	0.000401815	0.0053951	MXE	18071124-18071204~18109781-18109891;18122244-18122348~18123718-18123812
RI.329	ENSMUSG00000033669.8	Zfp7	chr15	+	1	1	1	0.585	1	0.052	0.454	0.00013585	0.00547929	RI	76888230-76888347~76888230-76892395~76890006-76892395
RI.2248	ENSMUSG00000034949.18	Zfr2	chr10	+	0.698	1	1	0.687	1	0.384	0.209	0.00013579	0.00547929	RI	81242769-81242956~81242769-81243795~81243649-81243795
SE.102	ENSMUSG00000067369.12	Trmt2b	chrX	-	1	1	1	0.754	1	0.853	0.131	0.000230719	0.0054814	SE	134262784-134262884~134263726-134263861~134266260-134266315
SE.14872	ENSMUSG00000005506.16	Celf1	chr2	+	0.764	0.518	0.587	1	0.832	0.866	-0.276	0.000230999	0.00548211	SE	90954288-90954341~90987664-90987816~90998579-90998616
SE.7482	ENSMUSG00000039068.16	Zzz3	chr3	+	0.277	0.061	0.047	0.033	0	0	0.117	0.00023129	0.00548309	SE	152427276-152428832~152446628-152446689~152446798-152446937
SE.20718	ENSMUSG00000021493.15	Pdlim7	chr13	-	0.411	1	0.582	1	1	1	-0.336	0.000232703	0.00551064	SE	55507487-55507624~55508207-55508326~55508891-55509043
SE.9991	ENSMUSG00000041540.16	Sox5	chr6	-	0.336	0.336	0.202	0.602	0.791	1	-0.506	0.000233155	0.00551542	SE	143873972-143874150~143907386-143907533~143941350-143941436
A3SS.2481	ENSMUSG00000031166.13	Wdr13	chrX	-	0.924	1	1	0.788	0.884	0.891	0.12	0.000109614	0.00556658	A3SS	8131384-8131591~8131591-8131625~8132286-8132366
A3SS.1379	ENSMUSG00000069769.13	Msi2	chr11	-	0.5	0.458	0.394	0.637	0.754	0.565	-0.201	0.000111597	0.00557434	A3SS	88348783-88348938~88348938-88348992~88366784-88366847
SE.12463	ENSMUSG00000026219.14	Trip12	chr1	-	0.142	0.163	0.157	0.264	0.229	0.232	-0.088	0.000236312	0.00558407	SE	84793524-84794327~84795689-84795815~84814822-84814969
A3SS.2357	ENSMUSG00000036570.14	Fxyd1	chr7	-	0.793	0.741	0.737	0.629	0.545	0.489	0.203	0.000113737	0.00558961	A3SS	31054305-31054370~31054370-31054434~31054672-31054818
SE.9641	ENSMUSG00000026387.15	Sctr	chr1	+	0.974	1	0.976	0.905	0.898	1	0.049	0.000237833	0.00558998	SE	120055384-120055476~120056393-120056520~120061893-120061935
SE.13056	ENSMUSG00000035513.19	Ntng2	chr2	-	0.41	0.364	0.302	0.222	0.216	0.099	0.18	0.000237357	0.00558998	SE	29196981-29197149~29198813-29198915~29204897-29204924
SE.14215	ENSMUSG00000051747.15	Ttn	chr2	-	0.87	0.868	0.905	0.667	0.628	0.802	0.182	0.000237032	0.00558998	SE	76848558-76848642~76850305-76850380~76850569-76850644
SE.15102	ENSMUSG00000039648.14	Kyat1	chr2	-	0	0.046	0.021	0.033	0.12	0.113	-0.066	0.000237808	0.00558998	SE	30191924-30192072~30192187-30192285~30194053-30194112
SE.16588	ENSMUSG00000009741.15	Ubp1	chr9	+	0.577	0.628	0.642	0.437	0.342	0.359	0.236	0.000237473	0.00558998	SE	113958828-113958939~113959375-113959483~113964551-113964655
MXE.2012	ENSMUSG00000019795.17	Pcmt1	chr10	-	0.655	0.768	0.805	0.541	0.607	0.525	0.185	0.00041939	0.00559695	MXE	7629372-7630976~7638055-7638225;7640694-7640815~7644324-7644429
A3SS.548	ENSMUSG00000025144.17	Cenpx	chr11	-	1	1	0.741	0.7	0.509	0.438	0.365	0.000116279	0.00562384	A3SS	120711702-120711756~120711756-120711895~120713692-120713738
SE.9604	ENSMUSG00000069769.13	Msi2	chr11	-	0.464	0.526	0.436	0.629	0.561	0.582	-0.115	0.000239888	0.00563225	SE	88343888-88344660~88348783-88348992~88366784-88366847
SE.1455	ENSMUSG00000024830.17	Rps6kb2	chr19	-	0.915	1	0.59	0.935	1	1	-0.143	0.000240342	0.00563689	SE	4162259-4162328~4162602-4162718~4163167-4163300
SE.6765	ENSMUSG00000063849.6	Ppcdc	chr9	-	1	1	0.653	0.725	0.408	1	0.173	0.000241177	0.00565042	SE	57437416-57437482~57439113-57439362~57440069-57440097
SE.14038	ENSMUSG00000051747.15	Ttn	chr2	-	0.391	0.382	0.58	0.282	0.165	0.201	0.235	0.000242358	0.00567205	SE	76831787-76831874~76832100-76832184~76841767-76841836
SE.17974	ENSMUSG00000041596.12	Nlrp5-ps	chr7	-	1	0	1	0	1	0	0.333	0.000242748	0.00567514	SE	14603139-14603190~14606565-14606642~14607239-14607320
MXE.1953	ENSMUSG00000027763.13	Mbnl1	chr3	+	0.067	0.058	0.08	0.152	0.155	0.1	-0.067	0.000428988	0.00569056	MXE	60615619-60615773~60621422-60621458;60622145-60622240~60625123-60625198
MXE.774	ENSMUSG00000003810.13	Mast2	chr4	-	0.38	0.401	0.507	0.137	0.27	0.29	0.197	0.000433103	0.00571073	MXE	116330390-116330469~116337421-116337497;116352972-116353064~116371476-116371732
RI.652	ENSMUSG00000020886.17	Dlg4	chr11	+	0	0.132	0	0.138	0.168	0.252	-0.142	0.000144095	0.00573221	RI	70030866-70030991~70030866-70031258~70031088-70031258
RI.2635	ENSMUSG00000002346.16	Slc25a42	chr8	-	0.17	0.139	0.09	0.264	0.293	0.193	-0.117	0.000146676	0.00575606	RI	70188832-70188949~70188832-70189577~70189410-70189577
SE.12862	ENSMUSG00000079427.10	Mthfsl	chr9	-	0.254	0.146	0.185	0	0	0	0.195	0.00024667	0.00576069	SE	88715487-88715749~88716493-88716563~88719658-88719813
SE.19153	ENSMUSG00000030737.17	Slco2b1	chr7	-	0.248	1	0	1	0.497	1	-0.416	0.000247351	0.00577048	SE	99691756-99691893~99695062-99695367~99695559-99695628
SE.3665	ENSMUSG00000034574.10	Daam1	chr12	+	0	0	0	0	0.053	0.524	-0.192	0.000249566	0.00581598	SE	71952451-71952559~71958746-71958773~71959805-71959912
SE.12333	ENSMUSG00000039844.20	Rapgef1	chr2	+	0.611	0.612	0.556	0.15	0.324	0.483	0.274	0.000250902	0.00582857	SE	29707197-29707400~29720642-29720738~29722223-29722309
SE.16077	ENSMUSG00000004698.11	Hdac9	chr12	-	0.944	1	1	0.88	0.923	0.778	0.121	0.000250778	0.00582857	SE	34312533-34312711~34373877-34374138~34389244-34389462
SE.21403	ENSMUSG00000022744.12	Cldnd1	chr16	+	0.035	0.116	0.24	0.042	0.022	0.028	0.1	0.000250637	0.00582857	SE	58727924-58728084~58729172-58729223~58729437-58729747
SE.1019	ENSMUSG00000024206.15	Rfx2	chr17	-	1	0.861	1	0.877	0.237	0.861	0.295	0.000252924	0.00586315	SE	56805357-56805447~56808233-56808325~56830882-56830939
SE.1826	ENSMUSG00000022515.6	Anks3	chr16	-	1	1	1	0.7	0.736	0.788	0.259	0.000252843	0.00586315	SE	4957640-4957762~4960396-4960568~4964119-4964173
SE.89	ENSMUSG00000031433.15	Rbm41	chrX	-	0.101	0.253	0	0.474	0.336	0.403	-0.286	0.000257934	0.00597298	SE	139968195-139968599~139991515-139991587~139993297-139993502
SE.10278	ENSMUSG00000026571.12	Dcaf6	chr1	-	0.965	0.988	0.975	0.826	0.932	0.895	0.092	0.000258935	0.00598984	SE	165371122-165371248~165374061-165374235~165388657-165388746
SE.4034	ENSMUSG00000020814.13	Mxra7	chr11	-	0	0	0	0.834	0	0.174	-0.336	0.000259748	0.00599593	SE	116807912-116807968~116810779-116810867~116811922-116812016
SE.14462	ENSMUSG00000051747.15	Ttn	chr2	-	0.988	0.987	0.971	0.998	0.987	0.998	-0.012	0.000259694	0.00599593	SE	76883909-76884197~76894141-76894423~76903062-76903626
SE.15841	ENSMUSG00000033352.11	Map2k4	chr11	-	0.946	0.915	0.845	1	0.963	0.98	-0.079	0.000260016	0.00599593	SE	65719483-65719603~65735191-65735366~65756268-65756371
SE.6573	ENSMUSG00000025499.18	Hras	chr7	-	0.013	0.034	0.006	0.061	0.012	0.083	-0.034	0.000260515	0.00600112	SE	141189933-141191467~141191954-141192036~141192130-141192290
MXE.1270	ENSMUSG00000026131.20	Dst	chr1	+	0.376	0.391	0.353	0.29	0.283	0.242	0.102	0.000462435	0.00602534	MXE	34116117-34116195~34117431-34117524;34135089-34135256~34152201-34152314
MXE.1762	ENSMUSG00000030852.18	Tacc2	chr7	+	0.899	0.901	0.842	0.88	0.823	0.811	0.043	0.000460859	0.00602534	MXE	130601836-130601937~130621720-130626841;130674601-130674739~130716702-130716839
SE.19667	ENSMUSG00000051375.15	Pcdh1	chr18	-	0.058	0	0	0.045	0.047	0.563	-0.199	0.000263073	0.0060537	SE	38185913-38189942~38191060-38191099~38192051-38192271
SE.14980	ENSMUSG00000016128.14	Stard13	chr5	-	1	1	1	0.849	0.875	0.651	0.208	0.000264315	0.00607593	SE	151062295-151063656~151073300-151073364~151092746-151092828
SE.1457	ENSMUSG00000024830.17	Rps6kb2	chr19	-	0.921	1	0.575	0.941	1	1	-0.148	0.000264855	0.00608197	SE	4162259-4162328~4162602-4162723~4163167-4163274
SE.13710	ENSMUSG00000015937.15	Macroh2a1	chr13	-	1	1	1	0.914	1	0.587	0.166	0.00026617	0.0061058	SE	56084195-56084285~56088251-56088342~56089757-56090058
MXE.541	ENSMUSG00000031835.16	Mbtps1	chr8	-	0.457	0.42	0.36	0.571	0.583	0.639	-0.185	0.000479495	0.00617454	MXE	119525367-119525556~119528923-119529068;119531048-119531210~119533320-119533472
MXE.2149	ENSMUSG00000032411.15	Tfdp2	chr9	+	0.667	0.517	0.732	0.294	0.263	0.475	0.295	0.000479294	0.00617454	MXE	96232681-96232748~96273838-96273942;96287600-96287722~96290579-96290627
SE.14156	ENSMUSG00000051747.15	Ttn	chr2	-	0.043	0.079	0.054	0.097	0.051	0.112	-0.028	0.000270589	0.00620069	SE	76831787-76831874~76847112-76847196~76847387-76847471
A3SS.1017	ENSMUSG00000057541.14	Pus7	chr5	-	0.098	0	0	0.329	0.304	0.068	-0.201	0.000130461	0.00621115	A3SS	23748755-23748843~23748843-23748922~23749804-23749866
RI.2096	ENSMUSG00000029625.16	Cpsf4	chr5	+	0.39	0.7	1	1	1	0.821	-0.244	0.000160831	0.00622738	RI	145177229-145177302~145177229-145178928~145178757-145178928
A3SS.2655	ENSMUSG00000040374.13	Pex2	chr3	-	1	1	1	0.934	0.94	0.722	0.135	0.000133224	0.00624514	A3SS	5560499-5561760~5561760-5561764~5562668-5562732
SE.10637	ENSMUSG00000038369.14	Ncoa6	chr2	-	0.477	0.733	0.578	0.071	0.095	0.407	0.405	0.000277544	0.00635345	SE	155440687-155440785~155449282-155449351~155473639-155473806
SE.19282	ENSMUSG00000036528.16	Ppfibp2	chr7	+	0.854	1	1	0.895	0.101	0.628	0.41	0.000281476	0.00643676	SE	107697566-107697698~107705283-107705466~107708779-107708872
SE.4334	ENSMUSG00000020866.17	Cacna1g	chr11	-	0	0	0	0.229	0	0.093	-0.107	0.000282146	0.0064389	SE	94411438-94411616~94414930-94415074~94415742-94416099
SE.10149	ENSMUSG00000033852.16	Gm28042	chr2	+	1	1	1	1	0.684	0.333	0.328	0.000282156	0.0064389	SE	120031306-120031402~120031501-120031651~120031840-120032000
SE.86	ENSMUSG00000047045.17	Tmem164	chrX	+	1	1	1	0.961	0.478	0.898	0.221	0.000286125	0.00652024	SE	142770966-142771033~142805989-142806068~142832500-142832601
SE.15329	ENSMUSG00000011658.16	Fuz	chr7	+	0.926	0.946	0.911	0.814	0.711	0.61	0.216	0.000286314	0.00652024	SE	44897519-44897624~44898515-44898700~44898775-44898871
SE.4055	ENSMUSG00000020776.18	Fbf1	chr11	-	1	1	1	0.661	0.271	1	0.356	0.000286863	0.00652599	SE	116164662-116164690~116165831-116165912~116167551-116167780
SE.17219	ENSMUSG00000002010.17	Idh3g	chrX	-	0.649	0.398	0.134	0.236	0	0	0.315	0.000287445	0.00653246	SE	73782005-73782103~73782297-73782309~73782674-73782716
SE.9673	ENSMUSG00000032534.18	Cep63	chr9	-	0.832	0.733	0.468	1	1	0.873	-0.28	0.000288427	0.006548	SE	102607325-102607439~102613294-102613417~102615274-102615370
SE.9650	ENSMUSG00000027883.15	Gpsm2	chr3	-	0.623	1	1	0.879	0.452	0.581	0.237	0.000291138	0.00660274	SE	108702864-108703086~108711276-108711580~108722040-108722309
SE.10196	ENSMUSG00000044037.15	Als2cl	chr9	+	0.493	0.752	0.669	0.888	1	0.81	-0.261	0.00029353	0.00664327	SE	110893986-110894160~110894295-110894392~110894565-110894723
SE.11005	ENSMUSG00000005893.14	Nr2c2	chr6	+	0.927	0.787	0.75	0.957	0.958	1	-0.15	0.000293523	0.00664327	SE	92091389-92091742~92138986-92139026~92139779-92139890
RI.1406	ENSMUSG00000003549.9	Ercc1	chr7	+	0.186	0.156	0.236	0.094	0.048	0.056	0.127	0.000179559	0.00667041	RI	19355100-19355172~19355100-19355361~19355292-19355361
RI.1662	ENSMUSG00000026211.17	Obsl1	chr1	-	0.065	0.037	0.079	0.028	0.017	0.015	0.04	0.000175315	0.00667041	RI	75502912-75503215~75502912-75503618~75503366-75503618
RI.2194	ENSMUSG00000024042.7	Sik1	chr17	-	0.085	0.119	0.077	0.035	0.062	0.048	0.045	0.000181461	0.00667041	RI	31848958-31849081~31848958-31849674~31849518-31849674
RI.2247	ENSMUSG00000023456.16	Tpi1	chr6	-	0.101	0.1	0.109	0.083	0.077	0.062	0.029	0.0001793	0.00667041	RI	124812620-124812705~124812620-124812913~124812789-124812913
SE.15799	ENSMUSG00000038982.10	Bloc1s5	chr13	-	1	0.888	1	0.834	1	0.444	0.203	0.000297101	0.00671717	SE	38598840-38604028~38612642-38612701~38619089-38619219
SE.18903	ENSMUSG00000024566.10	Atp9b	chr18	-	1	1	1	0.959	0.399	0.961	0.227	0.000298707	0.00674654	SE	80795289-80795432~80808611-80808772~80844526-80844602
A5SS.13	ENSMUSG00000073131.12	Vma21	chrX	+	0	0.026	0.035	0.184	0.063	0.035	-0.074	0.000169386	0.00680177	A5SS	71816789-71816940~71816940-71817067~71820067-71820177
SE.12328	ENSMUSG00000039844.20	Rapgef1	chr2	+	0.937	0.94	0.981	0.996	0.969	0.996	-0.034	0.000303633	0.00685077	SE	29707197-29707400~29710155-29710308~29719592-29719850
SE.11104	ENSMUSG00000021079.16	Timm9	chr12	-	0.576	0.872	0.392	0.242	0.193	0.159	0.415	0.000305218	0.00687945	SE	71132000-71132086~71132506-71132798~71136554-71136612
SE.1020	ENSMUSG00000007603.9	Dus3l	chr17	+	0.838	0.726	1	1	1	0.972	-0.136	0.000305774	0.00688492	SE	56768347-56768413~56768517-56768628~56768805-56768902
SE.21511	ENSMUSG00000038578.15	Susd1	chr4	-	0.72	0	0.155	0.595	1	1	-0.573	0.000307092	0.00690753	SE	59324867-59324907~59329462-59329721~59332936-59333033
SE.2230	ENSMUSG00000022197.16	Pdzd2	chr15	-	1	1	1	0.807	0.907	0.941	0.115	0.000307712	0.00691439	SE	12419457-12419572~12445522-12445665~12457797-12458299
SE.4168	ENSMUSG00000020694.17	Tlk2	chr11	+	0.88	0.888	0.826	0.725	0.613	0.478	0.259	0.000308042	0.00691474	SE	105209793-105209837~105210544-105210640~105221185-105221353
SE.10939	ENSMUSG00000063077.15	Kif1b	chr4	-	0.052	0.043	0.049	0.121	0.082	0.162	-0.074	0.000308526	0.00691854	SE	149192572-149192687~149195472-149195499~149198431-149198494
SE.17724	ENSMUSG00000028745.18	Capzb	chr4	+	0.795	0.899	0.763	0.705	0.759	0.654	0.113	0.000308977	0.00692159	SE	139287755-139287832~139288860-139288973~139291002-139291758
SE.9437	ENSMUSG00000009575.14	Cbx5	chr15	-	0	0.176	0	0.188	0.185	0.194	-0.13	0.00031198	0.00698175	SE	103213071-103213254~103215021-103215121~103239732-103239816
RI.189	ENSMUSG00000036775.13	Decr2	chr17	-	0.119	0	0	0.265	0.253	0.119	-0.173	0.000197881	0.00700788	RI	26083844-26083938~26083844-26084135~26084010-26084135
RI.2511	ENSMUSG00000018599.5	Mief2	chr11	+	0.124	0.124	0.082	0.178	0.131	0.202	-0.06	0.000196331	0.00700788	RI	60730282-60730435~60730282-60730792~60730629-60730792
RI.2611	ENSMUSG00000031634.13	Ufsp2	chr8	+	0.825	1	1	0.306	1	0.37	0.383	0.000193628	0.00700788	RI	45980314-45980467~45980314-45980639~45980572-45980639
RI.926	ENSMUSG00000028670.14	Lypla2	chr4	-	0.068	0.062	0.064	0.225	0.154	0.129	-0.105	0.00020058	0.00701787	RI	135969427-135969529~135969427-135969674~135969600-135969674
A3SS.1314	ENSMUSG00000000823.16	Zfp512b	chr2	-	0.198	0.33	0.156	0	0	0.092	0.197	0.000152978	0.00706248	A3SS	181587980-181588079~181588079-181588103~181588213-181588306
SE.17097	ENSMUSG00000025019.17	Lcor	chr19	+	0.931	1	1	0.949	0.761	0.964	0.086	0.000315946	0.00706332	SE	41528560-41528640~41545874-41546007~41552448-41552736
SE.6535	ENSMUSG00000028221.3	Pip4p2	chr4	+	0.864	0.842	0.838	0.988	0.915	0.948	-0.102	0.000316741	0.00707389	SE	14886533-14886682~14892392-14892499~14893500-14893624
SE.169	ENSMUSG00000043929.16	Klhl15	chrX	+	1	1	1	0.528	0.272	1	0.4	0.000317655	0.00708709	SE	94235220-94235420~94241944-94241995~94252414-94252740
RI.846	ENSMUSG00000054099.11	Slc25a40	chr5	+	1	1	1	0.468	0.646	1	0.295	0.000207308	0.00710048	RI	8440720-8440788~8440720-8442571~8442446-8442571
RI.1126	ENSMUSG00000041263.14	Rusc1	chr3	-	0.951	0.798	0.553	1	0.912	1	-0.203	0.000210246	0.00710048	RI	89089668-89089767~89089668-89089975~89089920-89089975
RI.1970	ENSMUSG00000021486.7	Prelid1	chr13	+	0.144	0.32	0.079	0.055	0.075	0.006	0.136	0.000210276	0.00710048	RI	55324330-55324444~55324330-55324605~55324526-55324605
A3SS.1735	ENSMUSG00000027082.15	Tfpi	chr2	-	0.817	0.528	1	0.566	0.085	0.318	0.459	0.000156372	0.00711144	A3SS	84440139-84442925~84442925-84443312~84444009-84444138
SE.1445	ENSMUSG00000022747.17	St3gal6	chr16	-	1	0.873	1	0.824	0.737	0.815	0.166	0.000319176	0.0071138	SE	58507447-58507614~58523501-58523672~58523926-58524134
SE.12434	ENSMUSG00000052707.8	Tnrc6a	chr7	+	0.686	0.636	0.466	0.466	1	1	-0.226	0.000319549	0.0071149	SE	123124667-123124715~123152163-123152185~123162493-123162663
MXE.495	ENSMUSG00000020456.17	Ogdh	chr11	+	0.001	0.003	0.002	0.019	0.016	0.019	-0.016	0.000560761	0.00717905	MXE	6313787-6313979~6316764-6316855;6316977-6317080~6334532-6334648
SE.12221	ENSMUSG00000055322.16	Tns1	chr1	-	0.957	0.907	0.912	1	1	0.976	-0.067	0.000324382	0.00721521	SE	73927911-73928110~73935897-73935936~73936331-73936355
SE.820	ENSMUSG00000037013.17	Ss18	chr18	-	1	1	0.943	0.775	0.925	0.941	0.101	0.000325282	0.007225	SE	14636495-14636618~14640256-14640361~14640955-14641123
SE.11087	ENSMUSG00000027281.16	Slx4ip	chr2	+	1	1	0	0.624	0.525	0	0.284	0.00032548	0.007225	SE	137000183-137000273~137004933-137005054~137043999-137044077
SE.14040	ENSMUSG00000051747.15	Ttn	chr2	-	0.466	0.704	0.642	0.405	0.212	0.284	0.304	0.000329045	0.00729676	SE	76831787-76831874~76832100-76832184~76844204-76844279
SE.1076	ENSMUSG00000061130.13	Ppm1b	chr17	+	1	1	1	0.802	1	0.602	0.199	0.000334242	0.00740453	SE	85005508-85005566~85023031-85023079~85023695-85023779
SE.7460	ENSMUSG00000030306.14	Tmtc1	chr6	-	0.857	0.771	0.892	0.722	0.765	0.696	0.112	0.000334703	0.00740728	SE	148271375-148271519~148284856-148284970~148294514-148294682
SE.12049	ENSMUSG00000035765.10	Dym	chr18	+	0.855	0.807	0.805	0.95	0.912	0.951	-0.115	0.000335691	0.00742168	SE	75063100-75063173~75080202-75080328~75114789-75114972
SE.9947	ENSMUSG00000035969.15	Rusc2	chr4	+	0	0.158	0.429	0.429	0.75	0.375	-0.322	0.00033616	0.00742458	SE	43383509-43383759~43413004-43413054~43414627-43414755
A3SS.2356	ENSMUSG00000036570.14	Fxyd1	chr7	-	0.829	0.854	0.791	0.879	0.871	0.893	-0.056	0.000167178	0.00745361	A3SS	31051681-31051780~31051780-31051815~31051932-31051987
A3SS.3046	ENSMUSG00000000902.13	Smarcb1	chr10	-	0	0	0.034	0.107	0.456	0.068	-0.199	0.000168789	0.00745361	A3SS	75897444-75897576~75897576-75897605~75904383-75904574
RI.2743	ENSMUSG00000057193.8	Slc44a2	chr9	+	0.109	0.077	0.131	0.186	0.118	0.262	-0.083	0.000223878	0.00747289	RI	21347034-21347129~21347034-21347986~21347882-21347986
SE.13873	ENSMUSG00000032479.15	Map4	chr9	+	0.845	0.912	0.854	0.773	0.839	0.8	0.066	0.000341112	0.00752639	SE	110036741-110036855~110037287-110040467~110063016-110063123
SE.8443	ENSMUSG00000031865.16	Dctn1	chr6	+	0.662	0.727	0.676	0.82	0.752	0.792	-0.1	0.000343758	0.00757716	SE	83183298-83183333~83187763-83187784~83189076-83189153
SE.19206	ENSMUSG00000036606.17	Plxnb2	chr15	-	1	1	1	0.962	0.711	0.968	0.12	0.0003449	0.00759471	SE	89170568-89170617~89171066-89171116~89180664-89180788
SE.6931	ENSMUSG00000038708.10	Golga4	chr9	+	0.008	0	0	0.055	0.007	0.053	-0.036	0.000345834	0.00760382	SE	118577141-118577228~118579541-118579606~118581848-118582519
SE.18010	ENSMUSG00000069601.14	Ank3	chr10	+	0.566	0.61	0.575	0.761	0.683	0.825	-0.173	0.000346006	0.00760382	SE	69884746-69884845~69885138-69885237~69892321-69892519
A3SS.2766	ENSMUSG00000002379.7	Ndufa11	chr17	+	0.976	0.984	0.996	0.968	0.96	0.942	0.029	0.000174795	0.00760858	A3SS	56721034-56721127~56721318-56721358~56721358-56721441
SE.21972	ENSMUSG00000001120.15	Pcbp3	chr10	-	0.398	0.248	0.398	0	0	0.117	0.309	0.000346697	0.00761141	SE	76825859-76825992~76847735-76847812~76892556-76892656
A5SS.315	ENSMUSG00000021068.17	Nin	chr12	-	0.856	0.809	1	0.514	0.816	0.527	0.269	0.000194311	0.00763305	A5SS	70020833-70021031~70025379-70025406~70025406-70025481
SE.6530	ENSMUSG00000028899.11	Taf12	chr4	+	0.824	0.867	0.964	0.595	0.761	0.444	0.285	0.00034899	0.0076541	SE	132274415-132274487~132281993-132282078~132282793-132283045
SE.10043	ENSMUSG00000027282.17	Mtch2	chr2	+	0.9	1	1	0.739	0.839	0.918	0.135	0.000349781	0.0076576	SE	90849597-90849704~90852815-90852866~90853050-90853113
SE.19807	ENSMUSG00000037519.17	Ppfia1	chr7	-	0.667	0.667	0.4	0.082	0	0.25	0.467	0.000349847	0.0076576	SE	144514440-144514524~144514871-144514946~144515985-144516120
SE.313	ENSMUSG00000024976.14	Shoc2	chr19	+	0	0.421	0.621	0	0	0	0.347	0.000351175	0.00767902	SE	53944884-53945013~53949818-53949943~53987453-53987642
A3SS.2562	ENSMUSG00000062785.14	Kcnc3	chr7	+	1	1	0.855	0.797	0.645	0.907	0.169	0.000179515	0.00770396	A3SS	44595160-44596268~44598380-44598383~44598383-44598575
SE.13244	ENSMUSG00000061462.18	Obscn	chr11	-	1	1	0.94	0.902	0.974	0.896	0.056	0.00035569	0.00777002	SE	59060843-59061107~59061423-59061687~59062030-59062294
SE.7826	ENSMUSG00000063235.16	Ptpmt1	chr2	-	0.401	0.394	0.342	0.164	0.157	0.252	0.188	0.000357549	0.00780289	SE	90913983-90914175~90916853-90916911~90917428-90917509
A5SS.156	ENSMUSG00000060657.8	Marf1	chr16	-	0.986	0.828	0.943	0.967	1	1	-0.07	0.000211752	0.00780891	A5SS	14151141-14151316~14152025-14152562~14152562-14152712
A5SS.573	ENSMUSG00000011257.19	Pabpc4	chr4	+	0.958	0.939	0.919	0.966	0.975	0.968	-0.031	0.000208846	0.00780891	A5SS	123295201-123295273~123295273-123295321~123295929-123296057
A5SS.680	ENSMUSG00000034771.15	Tle2	chr10	+	0.287	1	1	0.801	0	0	0.495	0.000205843	0.00780891	A5SS	81586212-81586337~81586337-81586373~81586854-81586928
SE.9828	ENSMUSG00000040025.17	Ythdf2	chr4	-	0.828	0.942	0.893	0.738	0.545	0.778	0.201	0.000358845	0.00782338	SE	132186687-132186947~132205513-132205715~132210751-132210809
SE.4186	ENSMUSG00000018412.16	Kansl1	chr11	-	0.741	0.77	0.76	0.624	0.532	0.443	0.224	0.000360935	0.00785475	SE	104342362-104342511~104342858-104343047~104343490-104343673
SE.20101	ENSMUSG00000029189.10	Sel1l3	chr5	-	1	1	1	0.964	0.937	0.941	0.053	0.000360998	0.00785475	SE	53187955-53188082~53199900-53200471~53213129-53213315
SE.5322	ENSMUSG00000035620.15	Ric8b	chr10	+	0.697	0.187	0	1	1	0.408	-0.508	0.000362555	0.00788082	SE	85008715-85008793~85009451-85009627~85015075-85018337
RI.1793	ENSMUSG00000066456.14	Hmgn3	chr9	-	1	1	1	1	0.652	0.824	0.175	0.000239319	0.00789754	RI	83109947-83110429~83109947-83111106~83111033-83111106
A5SS.811	ENSMUSG00000055296.14	Tmem245	chr4	-	0.797	0.363	0.759	0.759	1	1	-0.28	0.000220882	0.00798266	A5SS	56903211-56903247~56903353-56903917~56903917-56904049
SE.13145	ENSMUSG00000032599.12	Ip6k2	chr9	+	0.186	0.102	0	0.329	0.578	0.255	-0.291	0.000368049	0.00799233	SE	108795993-108796396~108798109-108798178~108798270-108798493
MXE.2034	ENSMUSG00000031596.15	Slc7a2	chr8	+	0.159	0.079	0.086	0.288	0.211	0.266	-0.147	0.000627991	0.00799328	MXE	40905504-40905727~40908055-40908195;40908397-40908534~40910994-40911097
SE.18248	ENSMUSG00000030602.13	Pak4	chr7	-	0	0	0	0.391	0.278	0	-0.223	0.000368556	0.00799544	SE	28569792-28569866~28570171-28570313~28598034-28598155
SE.3043	ENSMUSG00000021514.18	Zfp369	chr13	+	1	1	1	0.696	1	0.817	0.162	0.00036955	0.0080091	SE	65280261-65280388~65284920-65285016~65291822-65292305
RI.1284	ENSMUSG00000041319.14	Thoc6	chr17	-	0	0.242	0	0.299	0.175	0.305	-0.179	0.00024611	0.00803036	RI	23668975-23669110~23668975-23669306~23669195-23669306
SE.13262	ENSMUSG00000061462.18	Obscn	chr11	-	0.612	0.619	0.656	0.774	0.709	0.895	-0.164	0.000372089	0.00805618	SE	59061423-59061687~59062030-59062294~59067065-59067329
SE.19349	ENSMUSG00000038244.14	Mical2	chr7	+	0.942	0.896	0.97	1	1	1	-0.064	0.000376339	0.00814019	SE	112335328-112335430~112336848-112336974~112345245-112345353
SE.5576	ENSMUSG00000019528.18	Gyg	chr3	-	0.993	1	0.987	0.973	0.981	0.96	0.022	0.000376906	0.00814442	SE	20150538-20150701~20150952-20151127~20152729-20152865
SE.17376	ENSMUSG00000006673.14	Qrich1	chr9	+	1	1	1	0.983	0.928	0.955	0.045	0.000377769	0.00815506	SE	108528588-108528918~108533586-108534618~108541687-108541865
SE.16716	ENSMUSG00000002413.15	Braf	chr6	-	0.055	0.1	0.038	0.149	0.188	0.223	-0.122	0.000380519	0.00819659	SE	39644237-39644380~39646724-39646844~39648449-39648486
SE.17396	ENSMUSG00000030257.16	Srgap3	chr6	-	1	1	1	0.413	1	0	0.529	0.000380812	0.00819659	SE	112749361-112749422~112757153-112757430~112759748-112759776
SE.21769	ENSMUSG00000025786.17	Zdhhc3	chr9	-	0	0	0	0.031	0.009	0.087	-0.042	0.000380411	0.00819659	SE	123089032-123089156~123090976-123091132~123100262-123100592
SE.17310	ENSMUSG00000059439.15	Bcas3	chr11	+	1	0.973	1	0.947	0.879	0.94	0.069	0.000382092	0.0082161	SE	85495827-85495961~85509427-85509692~85531792-85531943
A3SS.1257	ENSMUSG00000034684.12	Sema3f	chr9	-	0	0.116	0	0.136	0.165	0.198	-0.128	0.000195337	0.00826657	A3SS	107684687-107684776~107684776-107684816~107685324-107685547
MXE.10	ENSMUSG00000034055.16	Phka1	chrX	-	0.249	0.229	0.249	0.334	0.296	0.342	-0.082	0.000655826	0.0082996	MXE	102574964-102575074~102586076-102586211;102592626-102592705~102597401-102597509
SE.1567	ENSMUSG00000002365.10	Snx9	chr17	+	0.185	0.095	0.13	0.074	0.056	0.049	0.077	0.000392286	0.00842661	SE	5841351-5841546~5870667-5870953~5886996-5887083
SE.7475	ENSMUSG00000039068.16	Zzz3	chr3	+	0.874	0.526	0.397	1	0.633	1	-0.279	0.000392649	0.00842661	SE	152420014-152420140~152422617-152422771~152446798-152446937
SE.13967	ENSMUSG00000051747.15	Ttn	chr2	-	1	0.997	1	0.991	0.967	0.957	0.027	0.000395848	0.00848697	SE	76816988-76817075~76826994-76827078~76831787-76831874
SE.15583	ENSMUSG00000038145.17	Snrk	chr9	+	0.22	0.361	0.232	0.07	0.168	0.095	0.16	0.000399061	0.00854752	SE	122131892-122131942~122133960-122134076~122136905-122137176
SE.11832	ENSMUSG00000035024.16	Ncapd3	chr9	+	0.936	0.924	0.87	0.647	0.784	0.645	0.218	0.000400353	0.00855851	SE	27030174-27030499~27030622-27030830~27036984-27037139
SE.15403	ENSMUSG00000020532.18	Acaca	chr11	+	0.223	0.282	0.264	0.668	0.601	0.775	-0.425	0.000400197	0.00855851	SE	84280391-84280510~84290287-84290311~84292890-84293034
SE.10258	ENSMUSG00000069631.14	Strada	chr11	-	1	1	1	1	0	0.658	0.447	0.000401165	0.00856754	SE	106173678-106173781~106184561-106184619~106187124-106187180
SE.11877	ENSMUSG00000031216.13	Stard8	chrX	+	0.877	1	1	0.814	0.764	0.881	0.139	0.00040234	0.0085843	SE	99060727-99060799~99063364-99063446~99064393-99064457
SE.2324	ENSMUSG00000013236.17	Ptprs	chr17	-	0.946	0.977	0.885	0.724	0.812	0.901	0.124	0.000405614	0.00864575	SE	56424879-56424977~56429098-56429157~56434452-56434597
RI.1146	ENSMUSG00000031340.8	Gabre	chrX	-	1	0	1	0.549	0.196	0.379	0.292	0.00026914	0.00868426	RI	72264518-72264608~72264518-72264739~72264704-72264739
SE.19156	ENSMUSG00000049288.4	Lix1l	chr3	+	1	1	1	0.871	1	0.904	0.075	0.00040807	0.00868967	SE	96614391-96614555~96618600-96618741~96621308-96621404
A3SS.2801	ENSMUSG00000021901.10	Bap1	chr14	+	0.892	0.946	0.959	1	1	0.983	-0.062	0.000208435	0.00870004	A3SS	31256660-31256791~31257288-31257625~31257625-31257767
SE.306	ENSMUSG00000024985.20	Tcf7l2	chr19	+	1	0	0	0.308	0.4	0.727	-0.145	0.000412812	0.00877365	SE	55925976-55926049~55926681-55926756~55931433-55933229
SE.17491	ENSMUSG00000030172.15	Erc1	chr6	-	1	1	0.871	0.832	0.615	0.827	0.199	0.000412639	0.00877365	SE	119694570-119694731~119713679-119713811~119722172-119722308
SE.13728	ENSMUSG00000027022.14	Xirp2	chr2	+	0.853	1	1	0.725	1	0.725	0.134	0.000415984	0.00883252	SE	67482245-67482383~67507046-67507180~67524771-67526604
RI.139	ENSMUSG00000001524.14	Gtf2h4	chr17	-	0.146	0.122	0.202	0.048	0	0.023	0.133	0.000277976	0.00886704	RI	35670656-35670745~35670656-35670962~35670865-35670962
RI.1224	ENSMUSG00000028656.14	Cap1	chr4	-	0.248	0.253	0.279	0.164	0.049	0.086	0.16	0.000280912	0.00886704	RI	122862622-122862746~122862622-122863085~122862900-122863085
RI.249	ENSMUSG00000038084.16	Opa1	chr16	+	0.102	0.09	0.069	0.184	0.169	0.134	-0.075	0.000291797	0.00901465	RI	29614125-29614198~29614125-29615164~29615048-29615164
RI.2389	ENSMUSG00000060601.13	Nr1h2	chr7	-	0.857	1	0.87	0.691	0.479	0.759	0.266	0.000289234	0.00901465	RI	44551954-44552343~44551954-44552620~44552506-44552620
SE.2897	ENSMUSG00000021709.14	Erbin	chr13	-	0	1	1	0.254	1	0.203	0.181	0.000425251	0.00901548	SE	103824719-103824926~103830187-103830331~103833497-103835028
SE.12331	ENSMUSG00000039844.20	Rapgef1	chr2	+	0.677	0.74	0.623	0.762	0.885	0.841	-0.149	0.000425421	0.00901548	SE	29707197-29707400~29719592-29719850~29722223-29722309
A3SS.553	ENSMUSG00000061306.16	Slc38a10	chr11	-	0.992	1	0.98	0.973	0.93	0.943	0.042	0.000222111	0.00914557	A3SS	120138985-120139092~120139092-120139129~120140592-120140686
SE.3775	ENSMUSG00000037989.15	Wnk2	chr13	-	0.953	0.852	0.942	0.991	0.97	0.972	-0.062	0.000433293	0.00917346	SE	49071990-49072040~49072501-49072795~49076136-49076664
MXE.1320	ENSMUSG00000041757.17	Plekha6	chr1	+	1	0.722	0.765	0.963	1	0.898	-0.125	0.000731205	0.00920065	MXE	133273857-133274374~133274792-133274879;133279372-133279453~133280338-133280407
RI.1645	ENSMUSG00000026269.14	Rnpepl1	chr1	+	0.912	1	1	0.896	0.925	0.689	0.134	0.000301133	0.00920515	RI	92916710-92916946~92916710-92917746~92917633-92917746
SE.17342	ENSMUSG00000035158.15	Mitf	chr6	+	0.762	0.802	0.719	1	0.876	1	-0.198	0.000435458	0.00921042	SE	97940917-97941302~97994380-97994464~97996373-97996469
SE.19174	ENSMUSG00000110195.1	Pde2a	chr7	+	0.511	0.519	0.578	0.323	0.347	0.31	0.209	0.000436013	0.0092133	SE	101451401-101451468~101461479-101461541~101481370-101481460
SE.11430	ENSMUSG00000035597.19	Prpf39	chr12	+	0.519	0.489	0.489	0.827	0.59	1	-0.307	0.000436832	0.00922174	SE	65043326-65043357~65043714-65043877~65044005-65044124
A5SS.1067	ENSMUSG00000029577.13	Ube3b	chr5	+	0.011	0	0	0.033	0	0.098	-0.04	0.000260805	0.00924067	A5SS	114404539-114404711~114404711-114404715~114406171-114406290
RI.12	ENSMUSG00000031232.17	Magt1	chrX	-	0.615	0.665	0.763	0.555	0.224	0.383	0.294	0.000312201	0.00925133	RI	105968083-105971026~105968083-105971479~105971435-105971479
RI.315	ENSMUSG00000022390.11	Zc3h7b	chr15	+	0.042	0.031	0.046	0.065	0.112	0.083	-0.047	0.000306905	0.00925133	RI	81779108-81779270~81779108-81780609~81780403-81780609
RI.2334	ENSMUSG00000040940.18	Arhgef1	chr7	+	0	0.029	0	0.031	0.016	0.122	-0.047	0.000311289	0.00925133	RI	24924795-24924883~24924795-24925062~24924975-24925062
SE.857	ENSMUSG00000024290.9	Rock1	chr18	-	0.34	0.162	0.127	0	0	0.162	0.156	0.000439149	0.00926175	SE	10073114-10073185~10073656-10073700~10079114-10079274
MXE.599	ENSMUSG00000026950.18	Neb	chr2	-	0.32	0.318	0.304	0.263	0.264	0.233	0.061	0.000744193	0.00931087	MXE	52162904-52163009~52163936-52164050;52164591-52164702~52165166-52165277
MXE.28	ENSMUSG00000025006.18	Sorbs1	chr19	-	0.113	0.122	0.112	0.065	0.075	0.099	0.036	0.00074869	0.00931421	MXE	40318021-40318068~40324746-40324832;40325470-40326937~40327449-40327622
SE.13771	ENSMUSG00000072591.10	Fzd10os	chr5	-	0	0.15	0	0.098	0.017	0.284	-0.083	0.000444989	0.00937591	SE	128579177-128579285~128584163-128584296~128585271-128585350
MXE.376	ENSMUSG00000021103.12	Mnat1	chr12	+	0.85	0.799	0.872	0.645	0.405	0.139	0.444	0.000761652	0.00942223	MXE	73167999-73168152~73170593-73170667;73179204-73179308~73181783-73181924
SE.3779	ENSMUSG00000022386.12	Trmu	chr15	+	0.54	0.369	1	0.54	0	0	0.456	0.000449222	0.00945603	SE	85893953-85894020~85894177-85894283~85894925-85895026
A5SS.1664	ENSMUSG00000022793.17	B4galt4	chr16	+	0.347	0.886	0.68	1	1	1	-0.362	0.000275296	0.00956653	A5SS	38763068-38763129~38763129-38763191~38765914-38766019
SE.20762	ENSMUSG00000025899.14	Alkbh8	chr9	+	0.84	0.641	0.863	0.858	1	1	-0.171	0.000458539	0.00964291	SE	3335472-3335594~3338455-3338591~3343014-3343252
SE.1140	ENSMUSG00000024299.17	Adamts10	chr17	+	0.774	1	0.687	0.942	1	1	-0.16	0.000461076	0.00968701	SE	33528679-33529026~33530132-33530289~33531579-33531797
MXE.1277	ENSMUSG00000023079.14	Gtf2ird1	chr5	-	0	0.227	0	0.595	0.329	0.269	-0.322	0.000789385	0.00971075	MXE	134389673-134389711~134390821-134390930;134392394-134392420~134395616-134395796
SE.8388	ENSMUSG00000043940.15	Wdfy3	chr5	-	0.022	0.128	0.109	0.132	0.237	0.206	-0.105	0.000465241	0.00976088	SE	101930827-101931005~101935989-101936073~101937281-101937739
SE.20715	ENSMUSG00000021493.15	Pdlim7	chr13	-	0.859	0.83	0.692	0.557	0.629	0.44	0.252	0.000465481	0.00976088	SE	55507487-55507624~55507863-55507880~55508207-55508326
SE.15208	ENSMUSG00000118623.1	AL935121.1	chr2	+	0.443	0.23	0.284	0.531	1	1	-0.525	0.000466758	0.00977213	SE	120495235-120495247~120495401-120495754~120495864-120496073
SE.15323	ENSMUSG00000031078.15	Cttn	chr7	-	0.605	1	1	0.335	0.668	0.338	0.421	0.000466906	0.00977213	SE	144449559-144449615~144450977-144451088~144452026-144452137
A5SS.461	ENSMUSG00000020227.10	Irak3	chr10	-	0.058	0	0	0.069	0.358	0.162	-0.177	0.000286999	0.00978503	A5SS	120146430-120146629~120165040-120165092~120165092-120165211
A5SS.295	ENSMUSG00000097451.11	Rian	chr12	+	0.825	0.85	1	0.787	0.81	0.763	0.105	0.000310773	0.00985203	A5SS	109656787-109656831~109656831-109656840~109658052-109658121
A5SS.622	ENSMUSG00000042354.7	Gnl3	chr14	-	0	0	0.155	0.416	0.234	0.057	-0.184	0.000306123	0.00985203	A5SS	31016321-31016454~31016812-31016826~31016826-31016907
A5SS.1723	ENSMUSG00000109324.2	Prmt1	chr7	-	0.096	0.121	0.102	0.301	0.162	0.323	-0.156	0.000307955	0.00985203	A5SS	44983485-44983587~44983770-44984079~44984079-44984133
A5SS.1806	ENSMUSG00000001120.15	Pcbp3	chr10	-	0	0.407	0	0.255	0.407	0.255	-0.17	0.000300602	0.00985203	A5SS	76781831-76781873~76785070-76785139~76785139-76785214
SE.11991	ENSMUSG00000026159.13	Agfg1	chr1	+	0.422	0.527	0.591	0.257	0.346	0.282	0.218	0.000472506	0.00987992	SE	82880007-82880127~82880746-82880818~82882227-82882437
SE.1198	ENSMUSG00000063952.16	Brpf3	chr17	+	0.377	0.547	0.547	0.752	1	1	-0.427	0.000476102	0.00994564	SE	28821085-28821592~28831313-28831411~28835761-28835916
SE.20745	ENSMUSG00000025812.18	Pard3	chr8	+	0.435	1	1	0.204	0.606	0	0.542	0.000478196	0.00997989	SE	127409555-127409704~127410728-127410773~127415569-127415797
SE.6246	ENSMUSG00000000296.8	Tpd52l1	chr10	-	1	1	1	1	0.332	0.902	0.255	0.000479636	0.0100005	SE	31332375-31332969~31338184-31338245~31341139-31341178
A5SS.782	ENSMUSG00000087380.7	2210408F21Rik	chr6	+	0.399	0.626	0.431	0.201	0.327	0.12	0.269	0.00032102	0.0100014	A5SS	31328288-31328360~31328360-31328389~31335990-31336062
SE.21796	ENSMUSG00000022151.16	Ttc33	chr15	+	0.847	0.823	0.907	0.971	0.949	0.975	-0.106	0.000483423	0.0100699	SE	5189581-5189803~5208368-5208450~5211998-5212043
SE.11066	ENSMUSG00000054752.16	Fsd1l	chr4	+	0.705	1	1	0.571	0.667	0.63	0.279	0.00048478	0.0100886	SE	53649791-53649893~53659512-53659634~53679793-53680003
SE.15774	ENSMUSG00000031996.17	Aplp2	chr9	-	0.325	0.353	0.269	0.227	0.227	0.144	0.116	0.000487148	0.0101283	SE	31153413-31153499~31156189-31156225~31157694-31157847
SE.2724	ENSMUSG00000021767.19	Kat6b	chr14	+	0.798	0.636	0.612	0.869	1	0.905	-0.243	0.000488011	0.0101366	SE	21619217-21619299~21624832-21625215~21626718-21626840
A3SS.2214	ENSMUSG00000005373.13	Mlxipl	chr5	+	0.436	0.326	0.162	0	0	0	0.308	0.000250216	0.0101654	A3SS	135132314-135132861~135133075-135133080~135133080-135133176
MXE.1403	ENSMUSG00000057897.14	Camk2b	chr11	-	0.765	0.652	0.68	0.828	0.844	0.794	-0.123	0.000834114	0.010204	MXE	5979672-5979721~5981069-5981114;5982500-5982572~5982720-5982758
A3SS.1654	ENSMUSG00000025572.17	Tmc6	chr11	-	0.231	0.311	0.475	0.644	1	1	-0.542	0.000255211	0.010232	A3SS	117770690-117770786~117770786-117770802~117772672-117772852
SE.8990	ENSMUSG00000021488.8	Nsd1	chr13	+	0.955	1	0.939	1	0.624	0.819	0.15	0.000494834	0.0102686	SE	55213203-55214150~55238689-55238862~55245517-55248077
SE.15889	ENSMUSG00000002546.17	Golga2	chr2	+	0.94	1	1	0.868	0.935	0.854	0.094	0.000497285	0.0103098	SE	32292092-32292215~32293314-32293395~32296625-32296721
SE.3459	ENSMUSG00000024150.12	Mcfd2	chr17	-	0.046	0.066	0	0.051	0.262	0.225	-0.142	0.000499885	0.0103539	SE	87257927-87258089~87258749-87258881~87265834-87265895
SE.21946	ENSMUSG00000021820.18	Camk2g	chr14	-	0.289	0.318	0.254	0.408	0.419	0.482	-0.149	0.00050464	0.0104425	SE	20755658-20755702~20757665-20757728~20760143-20760186
A5SS.1617	ENSMUSG00000004356.8	Utp20	chr10	-	0.222	0	0.102	0.322	0.47	0.25	-0.239	0.000344033	0.0105367	A5SS	88777404-88777549~88778109-88778222~88778222-88778446
SE.13594	ENSMUSG00000015189.12	Casd1	chr6	+	0.919	1	1	0.888	0.743	0.972	0.105	0.000509923	0.0105419	SE	4631518-4631598~4634001-4634103~4635745-4635886
SE.7920	ENSMUSG00000008763.16	Man1a2	chr3	-	0.89	0.933	0.77	1	0.925	1	-0.111	0.00051139	0.0105623	SE	100644540-100644621~100646991-100647110~100652538-100652635
SE.10192	ENSMUSG00000051985.12	Igfn1	chr1	-	0.975	1	1	0.835	1	0.871	0.09	0.000513622	0.0105985	SE	135979864-135980004~135981831-135981954~135982366-135982482
SE.20278	ENSMUSG00000006276.10	Eps15l1	chr8	-	0.953	1	0.891	0.645	1	0.772	0.142	0.000515317	0.0106235	SE	72345965-72346171~72358312-72358445~72367903-72367986
SE.9514	ENSMUSG00000037426.18	Depdc5	chr5	+	0.822	1	1	0.85	0.624	0.698	0.217	0.000517041	0.010649	SE	32983858-32984030~32986935-32986996~32990741-32990824
SE.13716	ENSMUSG00000027022.14	Xirp2	chr2	+	0.993	0.991	0.99	0.99	0.979	0.969	0.012	0.000518801	0.0106753	SE	67476717-67476866~67482245-67482383~67507046-67507180
SE.7664	ENSMUSG00000053819.16	Camk2d	chr3	+	1	1	0.931	0.835	0.955	0.963	0.059	0.00051939	0.0106774	SE	126801716-126801761~126805856-126805916~126808207-126808249
SE.4974	ENSMUSG00000025871.18	4833439L19Rik	chr13	-	0.993	1	0.992	0.967	0.976	0.912	0.043	0.000521928	0.0107095	SE	54559197-54559324~54561692-54561871~54564514-54564621
SE.17530	ENSMUSG00000040669.14	Phc1	chr6	-	0.727	1	1	0.639	1	0.262	0.275	0.000521486	0.0107095	SE	122325457-122325950~122332521-122332653~122333290-122333440
SE.18141	ENSMUSG00000000131.15	Xpo6	chr7	-	1	1	1	1	0	0	0.667	0.000525237	0.0107674	SE	126103078-126103190~126103622-126103715~126104703-126104808
RI.123	ENSMUSG00000007603.9	Dus3l	chr17	+	0.855	0.689	1	1	1	0.967	-0.141	0.000372972	0.010768	RI	56768347-56768413~56768347-56768902~56768805-56768902
RI.323	ENSMUSG00000068206.13	Pick1	chr15	+	0.033	0.093	0.039	0.093	0.134	0.147	-0.07	0.000374506	0.010768	RI	79245289-79246111~79245289-79246500~79246407-79246500
RI.2523	ENSMUSG00000014873.15	Surf2	chr2	+	1	1	1	0.807	0.39	1	0.268	0.000373035	0.010768	RI	26917427-26917531~26917427-26919055~26918928-26919055
RI.1975	ENSMUSG00000029165.17	Agbl5	chr5	+	0.536	0.248	0	0	0	0.142	0.214	0.000380654	0.0108375	RI	30893900-30894070~30893900-30894510~30894374-30894510
MXE.31	ENSMUSG00000025006.18	Sorbs1	chr19	-	0.46	0.495	0.569	0.405	0.271	0.321	0.176	0.000891041	0.0108402	MXE	40336985-40337035~40340044-40340146;40344355-40344439~40349898-40350013
RI.2393	ENSMUSG00000025728.16	Pigq	chr17	-	0.108	0.076	0.039	0.108	0.146	0.195	-0.075	0.000386204	0.0108887	RI	25931673-25931827~25931673-25932231~25932104-25932231
MXE.1864	ENSMUSG00000040940.18	Arhgef1	chr7	+	0.42	0.228	0.342	0.667	0.485	0.631	-0.264	0.000900118	0.0108904	MXE	24907853-24907934~24908310-24908424;24912056-24912155~24912309-24912352
A5SS.817	ENSMUSG00000037270.18	4932438A13Rik	chr3	+	0.713	0.498	0.876	0.475	0.292	0.195	0.375	0.000361924	0.0109	A5SS	37030546-37030643~37030643-37030748~37032364-37032526
A5SS.1153	ENSMUSG00000044308.17	Ubr3	chr2	+	0.329	0.231	0.328	0.542	0.404	0.508	-0.189	0.000368258	0.0109003	A5SS	69991424-69991625~69991625-69991637~69993675-69993812
A5SS.1198	ENSMUSG00000025747.12	Tyms	chr5	-	1	1	0.235	0.268	1	0.316	0.217	0.000373999	0.0109003	A5SS	30068465-30068640~30069833-30071633~30071633-30071707
RI.804	ENSMUSG00000024924.14	Vldlr	chr19	+	0.299	0.22	0.107	0.075	0.097	0.065	0.13	0.000392138	0.0109497	RI	27245534-27245681~27245534-27247090~27247009-27247090
SE.21070	ENSMUSG00000026353.9	Ubxn4	chr1	+	0.883	1	0.902	1	1	0.988	-0.068	0.000537139	0.0110011	SE	128269868-128269971~128272820-128272952~128274801-128275004
A5SS.1374	ENSMUSG00000030852.18	Tacc2	chr7	+	0.1	0.092	0.078	0.206	0.204	0.11	-0.083	0.000384472	0.0110276	A5SS	130734948-130735228~130735228-130735243~130739811-130739873
SE.17344	ENSMUSG00000035158.15	Mitf	chr6	+	0.901	0.907	0.67	1	0.83	1	-0.117	0.000542204	0.0110842	SE	97940917-97941302~97996373-97996469~98003886-98004004
SE.21371	ENSMUSG00000032495.8	Lrrc2	chr9	+	0.993	0.986	1	0.973	0.974	0.917	0.038	0.0005418	0.0110842	SE	110960801-110961009~110962514-110962671~110966440-110966577
A3SS.540	ENSMUSG00000020594.14	Pum2	chr12	+	0.986	0.966	1	0.915	0.947	0.92	0.057	0.000281044	0.0111213	A3SS	8713843-8713937~8718987-8719005~8719005-8719113
SE.4788	ENSMUSG00000020376.17	Rnf130	chr11	+	0.628	0.705	0.683	0.381	0.559	0.345	0.244	0.000545261	0.0111363	SE	50095775-50095980~50099245-50099339~50119044-50125719
SE.14870	ENSMUSG00000005506.16	Celf1	chr2	+	0.037	0.12	0.214	0	0.039	0.052	0.093	0.000547043	0.0111623	SE	90940396-90940641~90954288-90954341~90998579-90998767
SE.3384	ENSMUSG00000097451.11	Rian	chr12	+	0	1	0	0.627	0.189	0.529	-0.115	0.000551698	0.0112469	SE	109627047-109627153~109630020-109630191~109634193-109634354
SE.14656	ENSMUSG00000023932.9	Cdc5l	chr17	-	0.131	0.052	0.126	0.046	0	0	0.088	0.000552305	0.0112488	SE	45411827-45411990~45412524-45412634~45413121-45413270
SE.15807	ENSMUSG00000026427.16	Eif2d	chr1	+	1	0.789	0.898	0.945	1	1	-0.086	0.00055513	0.0112959	SE	131164402-131164506~131164619-131164769~131165119-131165209
MXE.1673	ENSMUSG00000061887.14	Ssbp3	chr4	+	0.118	0.135	0.019	0.258	0.171	0.238	-0.132	0.00094115	0.0113247	MXE	107009678-107009768~107027216-107027297;107028192-107028252~107030861-107030928
RI.1602	ENSMUSG00000013593.12	Ndufs2	chr1	-	0.047	0.051	0.059	0.023	0.036	0.027	0.024	0.000417582	0.0115491	RI	171237944-171238064~171237944-171238372~171238286-171238372
SE.2640	ENSMUSG00000021891.8	Mettl6	chr14	-	0.907	0.902	1	0.606	1	0.586	0.206	0.000568496	0.0115571	SE	31476819-31479810~31482790-31482932~31487570-31487618
SE.7665	ENSMUSG00000053819.16	Camk2d	chr3	+	0.735	0.714	0.641	0.853	0.987	0.88	-0.21	0.000569652	0.0115699	SE	126801716-126801761~126805856-126805916~126810638-126810687
SE.20452	ENSMUSG00000087579.7	Hectd2os	chr19	-	1	1	1	0.979	0.834	0.949	0.079	0.00057234	0.0116138	SE	36658427-36658566~36685526-36685667~36689238-36689273
SE.3621	ENSMUSG00000047454.12	Gphn	chr12	+	0.846	0.881	0.766	0.891	1	0.938	-0.112	0.000573596	0.0116285	SE	78492037-78492310~78493949-78494057~78504616-78504751
SE.13394	ENSMUSG00000026890.19	Lhx6	chr2	-	0.228	0	0.47	1	0	1	-0.434	0.000575135	0.011649	SE	36081952-36084075~36087367-36087471~36090961-36091136
SE.16129	ENSMUSG00000049550.17	Clip1	chr5	-	0.937	0.929	0.783	0.763	0.769	0.814	0.101	0.00057617	0.0116592	SE	123630224-123631169~123638955-123638988~123640493-123640554
SE.18021	ENSMUSG00000069601.14	Ank3	chr10	+	1	1	1	0.671	0.55	0.449	0.443	0.000578399	0.0116936	SE	69989934-69992475~69993544-69993762~69994371-69994446
MXE.256	ENSMUSG00000025290.17	Rps24	chr14	+	0.752	0.918	0.69	0.403	0.318	0.603	0.345	0.000991895	0.0118704	MXE	24493382-24493493~24494051-24494069;24495429-24495449~24495774-24495845
SE.13939	ENSMUSG00000051747.15	Ttn	chr2	-	1	1	1	0.961	0.906	0.971	0.054	0.000588449	0.0118767	SE	76818735-76818816~76821115-76821184~76847387-76847471
SE.17910	ENSMUSG00000031060.16	Rbm10	chrX	+	1	0.843	1	0.711	0.936	0.783	0.138	0.000588538	0.0118767	SE	20639432-20639502~20641182-20641256~20642743-20642830
SE.342	ENSMUSG00000025220.8	Oga	chr19	-	0.742	0.783	0.803	0.905	0.866	0.945	-0.129	0.000589794	0.0118911	SE	45761103-45761208~45762184-45762270~45765449-45765624
SE.7691	ENSMUSG00000028116.13	Myoz2	chr3	-	0.736	0.858	1	0.736	0.596	0.531	0.244	0.000595207	0.0119892	SE	123016548-123016678~123033191-123033363~123034191-123034280
MXE.1474	ENSMUSG00000051747.15	Ttn	chr2	-	0.251	0.364	0.222	0.228	0.151	0.186	0.091	0.00100739	0.0119907	MXE	76851554-76851764~76852056-76852137;76857609-76857690~76857903-76857987
A3SS.3016	ENSMUSG00000031660.13	Brd7	chr8	-	0.261	0.1	0.351	0.116	0.041	0.059	0.165	0.000307432	0.0120096	A3SS	88334104-88334216~88334216-88334219~88337080-88337137
SE.12596	ENSMUSG00000020458.16	Rtn4	chr11	+	0.905	0.823	0.952	0.997	1	0.998	-0.105	0.00060012	0.0120771	SE	29705534-29705591~29706409-29708770~29733632-29733840
SE.19898	ENSMUSG00000038457.17	Tmem255b	chr8	+	1	1	0.925	0.79	0.837	0.837	0.154	0.000601964	0.0121032	SE	13435458-13435667~13441137-13441280~13451025-13451115
SE.21665	ENSMUSG00000025894.11	Aasdhppt	chr9	-	0.922	1	1	0.89	0.713	0.885	0.145	0.000610786	0.0122693	SE	4302469-4302631~4303093-4303215~4309253-4309467
RI.1692	ENSMUSG00000053332.13	Gas5	chr1	+	0.467	0.422	0.598	0.931	0.686	1	-0.377	0.000450886	0.0123129	RI	161035982-161036014~161035982-161036244~161036207-161036244
RI.2208	ENSMUSG00000044906.6	4930503L19Rik	chr18	-	1	1	1	0.891	0.486	1	0.208	0.000453679	0.0123129	RI	70467334-70467485~70467334-70468517~70467758-70468517
A3SS.2248	ENSMUSG00000029625.16	Cpsf4	chr5	+	0.484	0.397	0.365	0.076	0.397	0.099	0.225	0.000320646	0.0123338	A3SS	145177229-145177302~145178757-145178835~145178835-145178928
A3SS.2282	ENSMUSG00000030556.13	Lrrc28	chr7	-	0.169	0.143	0	0.282	0.479	0.31	-0.253	0.000323828	0.0123338	A3SS	67559857-67559969~67559969-67560064~67617992-67618130
A3SS.2250	ENSMUSG00000029625.16	Cpsf4	chr5	+	0.298	0.271	0.394	0.085	0.426	0	0.151	0.000328096	0.0123421	A3SS	145177229-145177302~145178783-145178835~145178835-145178928
SE.16815	ENSMUSG00000002968.9	Med25	chr7	-	0.806	0.825	0.838	0.894	0.893	0.94	-0.086	0.000615171	0.0123461	SE	44880251-44880470~44880566-44880638~44880922-44881111
SE.4927	ENSMUSG00000020173.17	Cobl	chr11	-	0.983	0.99	0.978	0.949	0.945	0.925	0.044	0.000619931	0.012419	SE	12369593-12369691~12373328-12373373~12375809-12376038
SE.17788	ENSMUSG00000030313.15	Dennd5b	chr6	-	0.959	0.825	0.907	1	1	1	-0.103	0.000619853	0.012419	SE	149044482-149045019~149054899-149055087~149068049-149068716
SE.19575	ENSMUSG00000032198.9	Dock6	chr9	-	0.9	0.923	0.639	1	1	1	-0.179	0.000620496	0.012419	SE	21802813-21802903~21802992-21803118~21803921-21804001
MXE.569	ENSMUSG00000026950.18	Neb	chr2	-	0.117	0.152	0.111	0.142	0.147	0.224	-0.044	0.00105083	0.0124405	MXE	52150966-52151059~52151363-52151456;52157290-52157383~52157831-52157912
RI.1338	ENSMUSG00000021557.15	Agtpbp1	chr13	-	0.027	0.027	0.054	0.025	0.012	0	0.024	0.000465799	0.0125248	RI	59473687-59473817~59473687-59474712~59474531-59474712
MXE.1566	ENSMUSG00000005506.16	Celf1	chr2	+	0.093	0.222	0.234	0	0.073	0.085	0.13	0.00107118	0.0126136	MXE	90940396-90940641~90954288-90954341;90987664-90987816~90998579-90998767
SE.11554	ENSMUSG00000055116.8	Arntl	chr7	+	0	0.2	0	0.268	0.18	0.637	-0.295	0.000632178	0.0126413	SE	113280649-113280802~113281401-113281422~113283256-113283295
SE.14096	ENSMUSG00000051747.15	Ttn	chr2	-	0.106	0.136	0.12	0.187	0.114	0.185	-0.041	0.00063475	0.0126696	SE	76831787-76831874~76841089-76841389~76847387-76847471
SE.19581	ENSMUSG00000032198.9	Dock6	chr9	-	0.638	1	1	0.407	0.627	0.526	0.359	0.000634599	0.0126696	SE	21825782-21825875~21829473-21829578~21830213-21830377
SE.16297	ENSMUSG00000020593.16	Lpin1	chr12	-	0.981	0.991	0.984	0.947	0.917	0.964	0.043	0.000636573	0.0126945	SE	16568389-16568519~16571163-16571262~16573659-16573785
RI.1062	ENSMUSG00000027318.17	Adam33	chr2	-	1	0.686	0.406	0.354	0.084	0.084	0.523	0.000494856	0.0129465	RI	131053684-131053793~131053684-131054361~131053917-131054361
RI.1075	ENSMUSG00000007379.15	Dennd2c	chr3	+	0.096	0	1	0.525	1	0.356	-0.262	0.000492387	0.0129465	RI	103133214-103133345~103133214-103133851~103133738-103133851
RI.2499	ENSMUSG00000039934.12	Gsap	chr5	+	0.545	1	0.324	0.853	1	1	-0.328	0.000486128	0.0129465	RI	21270555-21270614~21270555-21271248~21271216-21271248
MXE.570	ENSMUSG00000026950.18	Neb	chr2	-	0.416	0.419	0.439	0.366	0.35	0.353	0.068	0.00110787	0.0129762	MXE	52150966-52151059~52151363-52151456;52159476-52159569~52160655-52160748
SE.17322	ENSMUSG00000064302.13	Clasp1	chr1	+	0.917	0.492	0.088	0.02	0.064	0.189	0.408	0.000656144	0.0130729	SE	118525296-118525455~118531977-118532085~118536134-118536197
SE.853	ENSMUSG00000024293.16	Esco1	chr18	-	0.813	0.892	0.93	1	0.941	1	-0.102	0.000663314	0.0132038	SE	10588438-10588550~10593745-10595875~10596338-10596441
SE.9408	ENSMUSG00000022307.16	Oxr1	chr15	+	0.183	0.17	0.351	0.718	0.419	0.434	-0.289	0.000664691	0.0132192	SE	41825889-41826052~41848669-41848750~41850458-41850584
SE.4713	ENSMUSG00000020400.17	Tnip1	chr11	-	0.875	1	1	0.512	0.823	0.893	0.216	0.000666244	0.0132381	SE	54939597-54939735~54940710-54940882~54962832-54962912
SE.10823	ENSMUSG00000027806.9	Tsc22d2	chr3	+	0.057	0.127	0.139	0	0	0	0.108	0.000667009	0.0132414	SE	58417483-58417613~58437316-58437475~58459330-58459382
RI.1808	ENSMUSG00000026554.15	Dcaf8	chr1	+	1	1	1	1	1	0.613	0.129	0.000511968	0.0132746	RI	172186295-172186368~172186295-172187460~172187352-172187460
SE.4035	ENSMUSG00000020814.13	Mxra7	chr11	-	0	0	0.395	0.328	0	0.495	-0.143	0.000671339	0.0133153	SE	116803061-116804654~116810787-116810867~116811922-116812016
SE.317	ENSMUSG00000025026.15	Add3	chr19	+	0.108	0.239	0.208	0.02	0.096	0.018	0.14	0.000672418	0.0133247	SE	53140516-53140714~53203413-53203475~53216800-53217015
SE.13493	ENSMUSG00000018449.12	Rpain	chr11	+	0.645	1	0.775	1	1	0.877	-0.152	0.000675103	0.0133658	SE	70973014-70973075~70973801-70973913~70974068-70974132
SE.17086	ENSMUSG00000001143.13	Lman2l	chr1	-	0.365	0.159	0.197	0	0.19	0	0.177	0.000676671	0.0133848	SE	36428299-36428461~36429422-36429455~36438749-36438832
RI.395	ENSMUSG00000040618.7	Pck2	chr14	+	0	0.097	0.139	0.185	0.327	0.101	-0.126	0.000521965	0.013414	RI	55544394-55545047~55544394-55545425~55545206-55545425
MXE.1640	ENSMUSG00000042359.18	Osbpl6	chr2	+	0.217	0.208	0.2	0.117	0.143	0.07	0.098	0.00116774	0.0136051	MXE	76555013-76555117~76555889-76555982;76560185-76560260~76564783-76564949
SE.8709	ENSMUSG00000035314.10	Gdpd5	chr7	+	0.876	1	1	1	0.692	0.674	0.17	0.000692255	0.0136808	SE	99424052-99424229~99438247-99438351~99441171-99441261
A5SS.965	ENSMUSG00000026213.15	Stk11ip	chr1	+	0.053	0	0	0.044	0.23	0.173	-0.131	0.000484662	0.0136841	A5SS	75524682-75524888~75524888-75524943~75525087-75525162
RI.40	ENSMUSG00000025006.18	Sorbs1	chr19	-	1	0.989	0.91	0.904	0.888	0.975	0.044	0.000541527	0.0137304	RI	40376644-40376803~40376644-40377016~40376983-40377016
RI.1100	ENSMUSG00000053158.10	Fes	chr7	-	0.212	0.65	0.43	0.179	0.037	0.024	0.351	0.000543731	0.0137304	RI	80383833-80384017~80383833-80384287~80384190-80384287
SE.11982	ENSMUSG00000033060.16	Lmo7	chr14	+	0.202	0.1	0.256	0.118	0.043	0.017	0.127	0.000697578	0.0137736	SE	101914276-101914337~101915687-101915744~101917630-101917656
SE.15870	ENSMUSG00000002944.15	Cd36	chr5	-	0.715	0.613	0.724	0.732	0.833	0.856	-0.123	0.0007	0.013809	SE	17829455-17829549~17835617-17835671~17849656-17849729
MXE.704	ENSMUSG00000037523.13	Mavs	chr2	+	0.275	0.341	0.276	0.538	0.376	0.462	-0.161	0.0012007	0.0139155	MXE	131234062-131234127~131238735-131238910;131240314-131240492~131241879-131242049
A3SS.1541	ENSMUSG00000049624.14	Slc17a5	chr9	-	0	0	0.153	0	0.231	0.513	-0.197	0.000375601	0.0139568	A3SS	78574649-78574737~78574737-78574753~78577029-78577263
MXE.327	ENSMUSG00000024335.20	Brd2	chr17	-	0.883	0.794	0.8	0.91	0.925	0.882	-0.08	0.00122247	0.0139913	MXE	34116197-34116335~34116597-34116689;34116907-34117211~34118605-34119900
MXE.804	ENSMUSG00000028116.13	Myoz2	chr3	-	0.035	0.058	0.014	0.015	0.017	0.009	0.022	0.0012263	0.0139913	MXE	123016548-123016678~123026062-123026232;123033191-123033363~123034191-123034280
MXE.1839	ENSMUSG00000026825.17	Dnm1	chr2	-	1	1	0.963	0.973	0.836	0.975	0.06	0.00122004	0.0139913	MXE	32327960-32328047~32333065-32333204;32334681-32334820~32335775-32335843
SE.4833	ENSMUSG00000020271.17	Fbxw11	chr11	+	0.074	0.166	0	0.298	0.442	0.106	-0.202	0.00071823	0.0141559	SE	32642865-32642935~32680200-32680302~32708187-32708250
SE.10801	ENSMUSG00000098789.7	Jmjd7	chr2	+	1	1	1	1	0.755	0.468	0.259	0.000719238	0.0141631	SE	120031306-120031402~120031574-120031651~120031840-120032000
SE.21790	ENSMUSG00000026603.13	Smyd2	chr1	-	0.013	0.027	0.009	0.022	0.027	0.084	-0.028	0.000723537	0.014235	SE	189897422-189897483~189898352-189898896~189899817-189899928
RI.2631	ENSMUSG00000031858.16	Mau2	chr8	-	0.687	0.778	0.633	0.357	0.537	0.462	0.247	0.000571192	0.0142995	RI	70022619-70022669~70022619-70023697~70023610-70023697
SE.16139	ENSMUSG00000034201.13	Gas2l1	chr11	-	1	0.859	1	1	0.638	0.925	0.099	0.000729189	0.0143209	SE	5060469-5062326~5062414-5062511~5062593-5062701
SE.21591	ENSMUSG00000031586.17	Rbpms	chr8	-	0.282	0.486	0.208	0.09	0	0.129	0.252	0.000729207	0.0143209	SE	33782643-33784186~33789391-33789495~33795081-33795150
SE.19025	ENSMUSG00000025103.8	Btbd1	chr7	-	1	0.991	0.99	0.962	0.931	0.984	0.035	0.000737003	0.014461	SE	81800596-81801150~81805741-81805939~81815914-81815955
SE.2540	ENSMUSG00000022130.10	Tgds	chr14	-	1	0.849	1	0.833	0.833	0.521	0.221	0.000739979	0.0145065	SE	118121718-118121861~118127494-118127585~118128222-118128291
SE.18878	ENSMUSG00000030509.17	Asb7	chr7	-	0.173	0.201	0.239	0.119	0	0	0.165	0.000742828	0.0145494	SE	66659649-66660255~66678156-66678245~66679079-66679341
SE.1825	ENSMUSG00000022515.6	Anks3	chr16	-	1	1	1	0.83	0.751	0.659	0.253	0.00074767	0.0146312	SE	4957640-4957762~4957967-4958166~4964119-4964192
SE.14363	ENSMUSG00000051747.15	Ttn	chr2	-	0.992	0.986	0.951	0.993	0.975	1	-0.013	0.000748792	0.0146401	SE	76883909-76884197~76884751-76885030~76885927-76886215
SE.7142	ENSMUSG00000038816.14	Ctnnal1	chr4	-	0	0	0	0	0.483	0.28	-0.254	0.000749605	0.0146429	SE	56837731-56837902~56838004-56838047~56838965-56839055
RI.1357	ENSMUSG00000026509.15	Capn2	chr1	-	0.119	0.105	0.197	0.082	0.094	0.069	0.059	0.000590173	0.0146484	RI	182489964-182490048~182489964-182491035~182490866-182491035
MXE.936	ENSMUSG00000087380.7	2210408F21Rik	chr6	+	0.697	0.605	0.57	0.789	0.833	0.944	-0.231	0.00129707	0.0147224	MXE	31220404-31220519~31285002-31285120;31328288-31328389~31335990-31336062
SE.21735	ENSMUSG00000030733.10	Sh2b1	chr7	-	0.435	0.224	0.235	0.076	0.207	0.089	0.174	0.000755509	0.0147452	SE	126472072-126473094~126473478-126473615~126474995-126475090
SE.18043	ENSMUSG00000032826.19	Ank2	chr3	-	0.71	0.743	0.666	0.875	0.815	0.81	-0.127	0.000761757	0.0148539	SE	126964937-126965162~126971002-126971038~126976050-126976154
A3SS.675	ENSMUSG00000042709.15	Atpaf2	chr11	-	0	0.083	0.028	0.156	0.143	0.193	-0.127	0.00040505	0.0148697	A3SS	60405775-60405856~60405856-60405877~60407293-60407391
SE.11744	ENSMUSG00000039298.16	Cdk5rap2	chr4	-	1	1	1	0.872	1	0.376	0.251	0.000765315	0.0149101	SE	70254635-70254814~70257334-70257383~70264490-70264680
SE.10865	ENSMUSG00000059263.9	Usp47	chr7	+	0.939	0.975	0.879	0.844	0.932	0.818	0.066	0.000767736	0.014944	SE	112023544-112023746~112046926-112046986~112053216-112053420
SE.3385	ENSMUSG00000097451.11	Rian	chr12	+	0	1	0	0.513	0.157	0.403	-0.024	0.000772487	0.0150232	SE	109627047-109627153~109630020-109630191~109634275-109634354
SE.5394	ENSMUSG00000043822.18	Adamtsl5	chr10	-	1	0.985	1	0.957	0.989	0.927	0.037	0.0007766	0.0150735	SE	80345042-80345103~80345321-80345413~80345512-80345703
SE.15023	ENSMUSG00000045302.13	Preb	chr5	-	0.808	0.822	0.854	0.958	0.917	1	-0.13	0.000777136	0.0150735	SE	30955492-30955737~30955931-30956089~30956261-30956334
SE.19221	ENSMUSG00000027247.16	Arhgap1	chr2	+	1	0.811	1	0.859	0.543	0.823	0.195	0.00077639	0.0150735	SE	91649859-91650252~91651763-91651823~91654072-91654207
RI.77	ENSMUSG00000083282.3	Ctsf	chr19	+	0.315	0.113	0.176	0.072	0.054	0.079	0.133	0.000614127	0.0151138	RI	4858591-4858672~4858591-4859522~4859402-4859522
MXE.1720	ENSMUSG00000029659.16	Medag	chr5	+	0.688	0.647	0.713	0.604	0.487	0.46	0.166	0.00134045	0.0151368	MXE	149411748-149412255~149422133-149422243;149426933-149427046~149427220-149427506
SE.13991	ENSMUSG00000051747.15	Ttn	chr2	-	1	0.727	1	0.667	0.609	1	0.15	0.000790354	0.0153164	SE	76826994-76827078~76827691-76827766~76841767-76841836
SE.4926	ENSMUSG00000020173.17	Cobl	chr11	-	0.841	0.964	0.809	0.694	0.612	0.816	0.164	0.000797056	0.0154101	SE	12343743-12343917~12365104-12365179~12369593-12369640
SE.7300	ENSMUSG00000027016.17	Zfp385b	chr2	-	0.597	0.624	0.7	0.494	0.463	0.229	0.245	0.000796989	0.0154101	SE	77476734-77476845~77481326-77481365~77503539-77503682
SE.20716	ENSMUSG00000021493.15	Pdlim7	chr13	-	0.993	0.984	0.992	0.902	0.818	0.976	0.091	0.000797291	0.0154101	SE	55507487-55507624~55507863-55507880~55508779-55508810
SE.20598	ENSMUSG00000031959.15	Wdr59	chr8	-	0.195	0.206	0.293	0.761	0.344	0.653	-0.355	0.000798245	0.015415	SE	111466788-111466922~111472629-111472686~111476043-111476197
SE.941	ENSMUSG00000024074.8	Crim1	chr17	+	0.942	1	1	0.904	0.858	0.93	0.083	0.000803227	0.0154976	SE	78237741-78237915~78302986-78303108~78313123-78313188
SE.5097	ENSMUSG00000090841.2	Myl6	chr10	-	0.089	0.163	0	0.325	0.259	0.369	-0.234	0.000808867	0.0155927	SE	128492601-128492745~128492938-128493045~128493333-128493353
SE.9255	ENSMUSG00000063765.12	Chadl	chr15	-	0.654	0	0.321	1	1	1	-0.675	0.000810191	0.0156045	SE	81692107-81692306~81692986-81693153~81693533-81694028
SE.1865	ENSMUSG00000056851.14	Pcbp2	chr15	+	0.802	0.699	0.836	0.875	0.879	0.962	-0.126	0.000811003	0.0156065	SE	102484153-102484240~102485947-102486040~102488204-102488277
SE.17230	ENSMUSG00000079477.9	Rab7	chr6	-	0.07	0.058	0.007	0.141	0.06	0.058	-0.041	0.000814935	0.0156684	SE	88013637-88013698~88015631-88015718~88045072-88045231
SE.1579	ENSMUSG00000022906.15	Parp9	chr16	+	1	1	1	0.765	1	0.352	0.294	0.000817565	0.0156915	SE	35941032-35941135~35943368-35943402~35947500-35948354
SE.4297	ENSMUSG00000001445.10	Mrpl10	chr11	+	0.918	1	0.896	0.981	1	1	-0.056	0.000817355	0.0156915	SE	97041559-97041652~97044527-97044697~97047029-97047194
SE.11508	ENSMUSG00000037679.9	Inf2	chr12	+	1	1	0.889	0.879	0.921	0.504	0.195	0.000822611	0.0157721	SE	112611409-112612036~112612547-112612604~112614894-112614957
SE.20419	ENSMUSG00000031652.11	N4bp1	chr8	-	0.765	0.93	0.87	1	1	0.913	-0.116	0.000823199	0.0157721	SE	86841138-86845041~86846814-86846922~86860425-86862110
MXE.1454	ENSMUSG00000051747.15	Ttn	chr2	-	0.775	0.819	0.767	0.863	0.887	0.875	-0.088	0.00141308	0.0158755	MXE	76831787-76831874~76832100-76832184;76843375-76843492~76844204-76844279
SE.8442	ENSMUSG00000031865.16	Dctn1	chr6	+	0	0.309	0	0.573	1	0	-0.421	0.000831015	0.015908	SE	83183935-83183956~83186427-83186445~83187763-83187784
SE.16417	ENSMUSG00000028772.19	Zcchc17	chr4	-	1	0.637	1	0.658	0.47	0.789	0.24	0.000833074	0.0159335	SE	130338483-130338584~130349264-130349322~130354135-130354256
SE.3894	ENSMUSG00000020608.7	Smc6	chr12	+	0.888	1	0.786	0.523	0.672	0.594	0.295	0.000833804	0.0159336	SE	11271728-11271871~11276259-11276365~11279604-11279727
SE.70	ENSMUSG00000025261.18	Huwe1	chrX	+	0.716	0.761	0.792	0.616	0.651	0.704	0.099	0.000839894	0.0160361	SE	151857807-151857913~151859454-151859688~151860166-151860268
SE.8151	ENSMUSG00000054252.18	Fgfr3	chr5	+	0	0.333	0.428	0.749	1	0.618	-0.535	0.000847236	0.0161622	SE	33730143-33730334~33731280-33731431~33732116-33732261
SE.7586	ENSMUSG00000028156.12	Eif4e	chr3	+	1	1	1	1	0.814	0.689	0.166	0.0008512	0.0162237	SE	138526424-138527314~138546320-138546427~138547658-138547754
A5SS.1215	ENSMUSG00000068134.13	Zfp120	chr2	-	0	0	0	1	0.445	0	-0.482	0.000587608	0.0163355	A5SS	150114405-150118200~150119480-150119564~150119564-150119628
MXE.672	ENSMUSG00000031902.10	Nfatc3	chr8	+	0.718	0.724	0.726	0.493	0.635	0.445	0.198	0.00146567	0.0163827	MXE	106096163-106096336~106099071-106099212;106100933-106100989~106104024-106104151
SE.8951	ENSMUSG00000041890.17	Git2	chr5	-	0.151	0.154	0.071	0.287	0.239	0.252	-0.134	0.000861089	0.016398	SE	114739032-114739281~114743775-114743880~114745428-114745571
SE.1866	ENSMUSG00000056851.14	Pcbp2	chr15	+	0.908	0.876	0.901	0.943	0.943	0.979	-0.06	0.000866468	0.0164862	SE	102484153-102484240~102487087-102487129~102488204-102488255
SE.3424	ENSMUSG00000058070.14	Eml1	chr12	+	0.886	0.97	0.804	0.753	0.767	0.599	0.18	0.000874332	0.0166214	SE	108502389-108502418~108503182-108503233~108506478-108506608
SE.13303	ENSMUSG00000061462.18	Obscn	chr11	-	0.172	0.227	0.081	0.366	0.53	1	-0.472	0.00087875	0.0166909	SE	59093295-59093571~59099689-59099965~59106294-59106570
SE.11713	ENSMUSG00000004360.9	9330159F19Rik	chr10	+	0	0	0	0.038	0.011	0.084	-0.044	0.000882101	0.0167401	SE	29222220-29222300~29223333-29223405~29224234-29225414
SE.3477	ENSMUSG00000033530.8	Ttc7b	chr12	-	0.958	0.934	0.952	0.865	0.947	0.674	0.119	0.000882961	0.0167408	SE	100332578-100332719~100343831-100343993~100347935-100348033
SE.19905	ENSMUSG00000071176.10	Arhgef10	chr8	+	1	1	1	0.816	0.84	0.916	0.143	0.000883662	0.0167408	SE	14929963-14930245~14932356-14932420~14934769-14934846
SE.10772	ENSMUSG00000061536.13	Sec22c	chr9	-	0.73	0.242	0.69	0.923	1	0.878	-0.38	0.000884959	0.016751	SE	121690235-121690415~121692909-121693073~121695533-121695742
RI.2738	ENSMUSG00000031985.9	Gnpat	chr8	+	0.183	0.278	0.157	0.148	0.128	0.062	0.093	0.000686898	0.0167626	RI	124886682-124886779~124886682-124886946~124886852-124886946
SE.16642	ENSMUSG00000044471.12	Lncpint	chr6	-	0.703	0.788	0.73	0.825	1	1	-0.201	0.000896941	0.0169632	SE	31181021-31181149~31197779-31197851~31216135-31216366
SE.8719	ENSMUSG00000022772.12	Senp5	chr16	-	1	0.593	0.795	0.708	0.593	0.226	0.287	0.000904944	0.0170998	SE	31968799-31968937~31977598-31977757~31983263-31983311
A3SS.161	ENSMUSG00000005936.19	Kctd20	chr17	+	0.016	0	0.025	0.04	0.23	0.032	-0.087	0.000472045	0.0171229	A3SS	28961413-28961687~28962646-28962809~28962809-28962912
SE.2726	ENSMUSG00000021767.19	Kat6b	chr14	+	0.872	0.775	0.757	0.906	1	0.944	-0.149	0.000907117	0.0171261	SE	21619217-21619299~21624832-21625761~21626718-21626840
SE.654	ENSMUSG00000042439.13	Zfp532	chr18	+	0.034	0.116	0.164	0.223	0.665	0.314	-0.296	0.00091482	0.0172271	SE	65625137-65625334~65644192-65644369~65682894-65683007
SE.16677	ENSMUSG00000038538.17	Ubn2	chr6	+	0.845	0.87	1	0.956	1	1	-0.08	0.000914694	0.0172271	SE	38440454-38440547~38452869-38452971~38461474-38461612
SE.17988	ENSMUSG00000050891.10	Tatdn1	chr15	-	0.953	1	1	0.799	1	0.799	0.118	0.000913309	0.0172271	SE	58905740-58905811~58909572-58909649~58916151-58916178
SE.696	ENSMUSG00000024613.16	Tcof1	chr18	-	0.965	0.935	1	0.945	0.664	0.945	0.115	0.000916861	0.0172508	SE	60831773-60831995~60832165-60832309~60832426-60832624
SE.14286	ENSMUSG00000051747.15	Ttn	chr2	-	0.876	0.95	0.93	0.79	0.89	0.76	0.105	0.000918318	0.0172634	SE	76856264-76856366~76857396-76857474~76857609-76857690
SE.3977	ENSMUSG00000025137.15	Pcyt2	chr11	-	0.614	0.584	0.475	0.898	0.688	0.869	-0.261	0.000928137	0.0174182	SE	120612462-120612601~120613029-120613083~120613378-120613423
SE.15713	ENSMUSG00000030536.10	Iqgap1	chr7	-	0.057	0.05	0.058	0.126	0.137	0.159	-0.086	0.000927702	0.0174182	SE	80728848-80729081~80729643-80729691~80730068-80730153
SE.13970	ENSMUSG00000051747.15	Ttn	chr2	-	1	1	1	0.991	0.961	0.967	0.027	0.000931488	0.0174364	SE	76818735-76818816~76826994-76827078~76831787-76831874
SE.15234	ENSMUSG00000033526.16	Ppip5k1	chr2	-	0.988	0.938	0.985	0.864	0.956	0.853	0.079	0.000930818	0.0174364	SE	121321689-121321792~121323193-121323376~121326851-121326914
SE.15573	ENSMUSG00000042359.18	Osbpl6	chr2	+	0.736	0.738	0.815	1	0.842	0.91	-0.154	0.000930788	0.0174364	SE	76555889-76555982~76560185-76560260~76564783-76564949
SE.14866	ENSMUSG00000026723.10	Trdmt1	chr2	-	0.078	0	0	0.276	0.276	0.202	-0.225	0.000936918	0.0175231	SE	13523425-13523497~13524950-13524997~13525617-13525694
SE.16524	ENSMUSG00000029759.9	Pon3	chr6	-	0.868	0.897	0.939	0.958	0.983	0.98	-0.072	0.000937785	0.0175245	SE	5246047-5246333~5254515-5254586~5256152-5256214
RI.1498	ENSMUSG00000038685.18	Rtel1	chr2	+	0.816	1	1	0.525	0.689	1	0.201	0.00072792	0.0176157	RI	181354352-181354442~181354352-181355552~181355309-181355552
A3SS.113	ENSMUSG00000024070.15	Prkd3	chr17	-	0.951	0.915	0.922	0.932	0.683	0.588	0.195	0.000497199	0.0177131	A3SS	78962526-78962576~78962576-78962579~78966174-78966451
A3SS.2733	ENSMUSG00000028060.14	Khdc4	chr3	+	0.903	0.947	0.772	0.939	0.963	1	-0.093	0.000499944	0.0177131	A3SS	88699950-88700008~88700260-88700364~88700364-88700514
SE.18926	ENSMUSG00000027763.13	Mbnl1	chr3	+	0.6	0.619	0.705	0.494	0.541	0.555	0.111	0.000952772	0.0177894	SE	60501219-60501423~60528755-60528978~60595593-60598100
A5SS.956	ENSMUSG00000028906.17	Epb41	chr4	-	0.312	0.405	0.614	1	1	0	-0.223	0.000655035	0.0179341	A5SS	131937014-131937464~131955527-131955542~131955542-131955578
MXE.1488	ENSMUSG00000051747.15	Ttn	chr2	-	0.619	0.631	0.693	0.709	0.678	0.739	-0.061	0.00161356	0.0179447	MXE	76857903-76857987~76859459-76859546;76862349-76862427~76862799-76862859
SE.7435	ENSMUSG00000003810.13	Mast2	chr4	-	0.262	0.239	0.376	0.527	0.45	0.479	-0.193	0.000966162	0.0180241	SE	116352972-116353064~116368735-116368784~116371476-116371734
RI.87	ENSMUSG00000024913.16	Lrp5	chr19	-	0.039	0.029	0.051	0.028	0.02	0.017	0.018	0.000751721	0.0180413	RI	3593515-3593626~3593515-3597480~3597243-3597480
SE.10484	ENSMUSG00000051586.17	Mical3	chr6	-	0	0	0.23	0.348	0	0.554	-0.224	0.000968753	0.0180418	SE	120935173-120935273~120946552-120946603~120951300-120951394
SE.12817	ENSMUSG00000036591.16	Arhgap21	chr2	-	0.06	0.35	0.041	0	0	0	0.15	0.000967998	0.0180418	SE	20853041-20853069~20854619-20854643~20854934-20855040
SE.15435	ENSMUSG00000028522.16	Mier1	chr4	+	0.573	1	0.728	0.401	1	0.182	0.239	0.000972727	0.0181005	SE	103115559-103115660~103118241-103118315~103127272-103127297
SE.4559	ENSMUSG00000020821.17	Kif1c	chr11	+	0.443	0.405	0.446	0.469	0.573	0.544	-0.097	0.000975466	0.0181054	SE	70700560-70700709~70702371-70702551~70702771-70702905
SE.5628	ENSMUSG00000026950.18	Neb	chr2	-	0.934	1	1	0.552	1	0.426	0.319	0.000974881	0.0181054	SE	52149589-52149697~52150966-52151059~52161370-52161475
SE.18267	ENSMUSG00000054808.15	Actn4	chr7	-	0.041	0.025	0	0.037	0.161	0.064	-0.065	0.000974227	0.0181054	SE	28906971-28907064~28909902-28909988~28911489-28911575
SE.9445	ENSMUSG00000055296.14	Tmem245	chr4	-	0.707	0.858	0.812	0.397	0.655	0.223	0.367	0.000978152	0.0181247	SE	56916701-56916806~56922386-56922410~56923338-56923508
SE.18410	ENSMUSG00000025425.18	St8sia5	chr18	+	0.565	0.605	0.484	0.368	0.339	0.284	0.221	0.000977416	0.0181247	SE	77185838-77186225~77211655-77211763~77232792-77232885
SE.14278	ENSMUSG00000051747.15	Ttn	chr2	-	0.851	0.871	0.9	0.935	0.932	0.902	-0.049	0.000980815	0.0181587	SE	76856264-76856366~76857154-76857229~76857396-76857474
MXE.578	ENSMUSG00000026950.18	Neb	chr2	-	0.11	0.122	0.083	0.119	0.153	0.157	-0.038	0.00165214	0.0182815	MXE	52151363-52151456~52153055-52153148;52156354-52156447~52157290-52157383
SE.2883	ENSMUSG00000046169.10	Adamts6	chr13	+	1	1	1	0.672	0.746	0.725	0.286	0.000991766	0.018346	SE	104347347-104347391~104352757-104352863~104366793-104366940
SE.2683	ENSMUSG00000046753.10	Ccdc66	chr14	-	0.086	0.143	0.429	0.086	0	0.018	0.185	0.000995842	0.0184059	SE	27482406-27482602~27482940-27483190~27483807-27483875
SE.15144	ENSMUSG00000063659.11	Zbtb18	chr1	+	0.067	0.067	0.141	0.016	0	0.074	0.062	0.00099896	0.018448	SE	177442465-177442595~177443223-177443341~177447088-177447486
SE.16279	ENSMUSG00000057691.8	Zfp746	chr6	-	0.666	0.926	1	1	1	1	-0.136	0.00100482	0.0185407	SE	48062394-48064952~48066428-48066554~48067168-48067360
SE.8076	ENSMUSG00000099083.7	Atf7	chr15	-	1	1	1	0.941	0.864	1	0.065	0.00100886	0.0185996	SE	102536642-102538291~102540739-102540937~102546404-102546557
SE.6634	ENSMUSG00000037211.12	Spry1	chr3	+	0.732	0.291	0.867	0.915	1	0.857	-0.294	0.00101065	0.0186141	SE	37639957-37640105~37640519-37640808~37642554-37644598
SE.7073	ENSMUSG00000031644.19	Nek1	chr8	+	0.21	0	0	0.347	0.587	0.151	-0.292	0.00101134	0.0186141	SE	61049783-61049947~61050027-61050159~61054519-61054622
SE.21159	ENSMUSG00000051705.13	Senp8	chr9	-	0.634	1	1	0.634	0	0	0.667	0.00101222	0.0186147	SE	59739939-59740051~59750261-59750371~59750577-59750627
SE.21777	ENSMUSG00000039031.16	Arhgap18	chr10	+	1	1	1	1	0.72	1	0.093	0.0010162	0.0186722	SE	26878890-26879050~26880687-26880770~26887780-26887987
SE.15020	ENSMUSG00000045302.13	Preb	chr5	-	0.895	0.926	0.94	0.985	0.954	1	-0.059	0.00103212	0.0189489	SE	30950852-30955737~30955929-30956089~30956261-30956334
SE.1516	ENSMUSG00000035258.15	Abi3bp	chr16	+	0.725	1	0.681	1	1	0.84	-0.145	0.00103396	0.0189668	SE	56647024-56647099~56654001-56654079~56657265-56657331
MXE.839	ENSMUSG00000054252.18	Fgfr3	chr5	+	0.395	0.14	0.14	0.439	0.797	0.495	-0.352	0.00172978	0.0190449	MXE	33730143-33730334~33731280-33731431;33732116-33732261~33732721-33732912
SE.1904	ENSMUSG00000023007.15	Prpf40b	chr15	+	0.751	1	0.564	0.126	1	0.301	0.296	0.00103993	0.0190605	SE	99295270-99295428~99301786-99301984~99303282-99303363
SE.13720	ENSMUSG00000027022.14	Xirp2	chr2	+	0.946	0.946	0.94	0.937	0.892	0.789	0.071	0.00104208	0.019084	SE	67476717-67476866~67505033-67505123~67507046-67507180
SE.10942	ENSMUSG00000063077.15	Kif1b	chr4	-	0.141	0.263	0.172	0.256	0.359	0.33	-0.123	0.00104788	0.0191742	SE	149214906-149215025~149220541-149220790~149222226-149222364
A3SS.537	ENSMUSG00000020608.7	Smc6	chr12	+	0	0	0	0.058	0.153	0.057	-0.089	0.000554377	0.0194159	A3SS	11294922-11295083~11297102-11297149~11297149-11297285
SE.16116	ENSMUSG00000029442.18	Wdr66	chr5	+	0.118	0	0	0.416	1	0	-0.433	0.00106546	0.0194797	SE	123290008-123290066~123293789-123293920~123297420-123297535
MXE.1032	ENSMUSG00000006010.14	Odr4	chr1	-	0.866	0.697	0.767	0.562	0.544	0.52	0.235	0.00178	0.0195003	MXE	150375495-150375624~150380311-150380377;150381498-150381594~150382267-150382408
SE.12005	ENSMUSG00000014592.21	Camta1	chr4	-	0.036	0.038	0.1	0.207	0.092	0.203	-0.109	0.00106819	0.0195112	SE	151059524-151062855~151071425-151071456~151073987-151074062
SE.19759	ENSMUSG00000025147.7	Mob2	chr7	-	0.077	0.119	0.114	0	0.045	0.033	0.077	0.00106955	0.0195112	SE	142016344-142016505~142025829-142025957~142060984-142061064
SE.21302	ENSMUSG00000032355.16	Mlip	chr9	-	0.85	0.879	0.904	0.947	0.935	0.941	-0.063	0.00106985	0.0195112	SE	77190671-77190737~77229484-77231029~77239391-77239784
RI.463	ENSMUSG00000044258.10	Ctla2a	chr13	-	1	1	1	0.631	0.673	0.407	0.43	0.000820468	0.0195298	RI	60935546-60935669~60935546-60936075~60935957-60936075
SE.17340	ENSMUSG00000035158.15	Mitf	chr6	+	0.735	0.781	0.636	1	0.649	1	-0.166	0.00107193	0.0195329	SE	97940917-97941302~97993126-97993354~97996373-97996469
SE.6305	ENSMUSG00000020107.10	Anapc16	chr10	-	0.692	0.6	0.84	0.333	0	0.333	0.489	0.00107698	0.0196088	SE	59990832-59990907~60002417-60002467~60002955-60002995
SE.7092	ENSMUSG00000035325.16	Sec31a	chr5	-	0.476	0.641	0.442	0.102	0.335	0.131	0.33	0.00108251	0.019693	SE	100368293-100368352~100369595-100369634~100373379-100373715
SE.8811	ENSMUSG00000021254.9	Gpatch2l	chr12	+	1	1	1	0.948	0.925	0.846	0.094	0.00108745	0.0197666	SE	86256867-86256932~86260576-86260753~86261615-86261695
SE.405	ENSMUSG00000048720.8	Tbc1d12	chr19	+	1	1	0.745	0.636	0.84	0.762	0.169	0.00108901	0.0197785	SE	38895986-38896069~38901308-38901415~38907771-38907852
SE.6572	ENSMUSG00000035666.14	Gtf3c4	chr2	-	0	0.163	0.369	0.369	0.369	0.637	-0.281	0.00109885	0.0199263	SE	28836024-28836127~28836410-28836516~28839882-28840352
SE.19855	ENSMUSG00000031508.14	Ankrd10	chr8	-	0.186	0.364	0.314	0.741	0.8	0.51	-0.396	0.00109895	0.0199263	SE	11619061-11619297~11620261-11620373~11628438-11628530
SE.11453	ENSMUSG00000026933.17	Camsap1	chr2	-	0.105	0.086	0.12	0	0.049	0	0.087	0.00110082	0.0199436	SE	25952677-25952819~25955259-25955292~25956246-25956327
SE.8381	ENSMUSG00000053110.13	Yap1	chr9	-	0.678	0.625	0.493	0.408	0.47	0.333	0.195	0.00110222	0.0199525	SE	7938407-7938538~7950491-7950539~7952952-7953134
SE.21198	ENSMUSG00000032370.8	Lactb	chr9	-	0.972	1	1	0.917	1	0.841	0.071	0.0011039	0.0199664	SE	66955392-66956200~66967678-66967844~66970581-66970936
SE.4062	ENSMUSG00000020758.15	Itgb4	chr11	+	0.548	0.362	0.842	0.593	1	1	-0.28	0.00110672	0.0199683	SE	116005530-116005767~116005896-116006055~116006460-116006610
SE.9073	ENSMUSG00000030409.16	Dmpk	chr7	+	0.947	0.945	0.956	0.987	0.978	0.989	-0.035	0.00110532	0.0199683	SE	19091938-19092036~19092417-19092632~19092949-19093819
SE.15670	ENSMUSG00000064202.15	4430402I18Rik	chr19	-	1	0	0	1	1	0.439	-0.48	0.00110612	0.0199683	SE	28948618-28948743~28954089-28954131~28959679-28959728
SE.9653	ENSMUSG00000021413.9	Prpf4b	chr13	+	0.627	0.101	0.627	0	0.224	0	0.377	0.0011177	0.0201499	SE	34903108-34903273~34903529-34903602~34904043-34904089
SE.1580	ENSMUSG00000022906.15	Parp9	chr16	+	1	1	1	0.86	1	0.339	0.267	0.00111953	0.0201594	SE	35941032-35941135~35943368-35943510~35947500-35948354
SE.11004	ENSMUSG00000005893.14	Nr2c2	chr6	+	0.391	0	0.391	0.719	0.391	1	-0.443	0.00112007	0.0201594	SE	92091389-92091742~92105281-92105365~92139779-92139890
SE.20012	ENSMUSG00000026313.16	Hdac4	chr1	-	0.196	0.213	0.339	0.118	0.029	0.152	0.15	0.00112256	0.0201877	SE	92054900-92054972~92091731-92091818~92148255-92148494
A3SS.75	ENSMUSG00000024853.10	Sf3b2	chr19	-	0.989	0.975	0.976	0.931	0.919	0.948	0.047	0.000585386	0.0201965	A3SS	5288303-5288410~5288410-5288413~5291304-5291422
A3SS.1749	ENSMUSG00000031278.12	Acsl4	chrX	-	0.132	0.193	0.163	0.446	0.21	0.383	-0.184	0.000596549	0.0201965	A3SS	142351378-142351618~142351618-142351908~142360386-142360436
A3SS.2857	ENSMUSG00000030583.16	Sipa1l3	chr7	-	0.14	0.164	0	0.346	0.164	0.428	-0.211	0.000590628	0.0201965	A3SS	29331297-29331541~29331541-29331544~29332224-29332390
A5SS.478	ENSMUSG00000113949.1	Scamp4	chr10	+	1	1	1	0.88	0.851	0.859	0.137	0.000749459	0.020213	A5SS	80609329-80609424~80609424-80609458~80609640-80609797
A3SS.1597	ENSMUSG00000037784.14	Dzip1l	chr9	+	0	1	1	0.37	0	0.797	0.278	0.000604161	0.0202294	A3SS	99662940-99663157~99663525-99663528~99663528-99663716
RI.785	ENSMUSG00000004815.12	Dgkq	chr5	-	0	0	0.16	0.143	0.488	0.1	-0.19	0.000857415	0.0202434	RI	108655289-108655364~108655289-108655593~108655439-108655593
SE.5182	ENSMUSG00000020166.15	Cnot2	chr10	-	0.949	1	0.888	0.757	0.788	0.839	0.151	0.00113159	0.0203002	SE	116517316-116517383~116527826-116527949~116549032-116549105
SE.11171	ENSMUSG00000085396.7	Firre	chrX	-	1	0.448	1	0.575	0.765	0	0.369	0.00113111	0.0203002	SE	50603438-50603525~50608477-50608604~50608686-50608814
SE.12810	ENSMUSG00000025027.18	Xpnpep1	chr19	-	0.705	0.856	0.764	0.419	0.327	0.663	0.305	0.00112998	0.0203002	SE	53025258-53025383~53032008-53032097~53038513-53038553
SE.8057	ENSMUSG00000036202.16	Rif1	chr2	+	0.787	0.947	1	0.631	0.517	0.767	0.273	0.00113293	0.0203078	SE	52116247-52116394~52116667-52116745~52116834-52116950
SE.12269	ENSMUSG00000042349.13	Ikbke	chr1	-	1	0	0	0.703	1	0.612	-0.438	0.00114259	0.0204643	SE	131259019-131259283~131260005-131260045~131263272-131263349
MXE.313	ENSMUSG00000046876.16	Atxn1	chr13	-	0.814	0.68	0.771	0.639	0.644	0.636	0.115	0.00188962	0.0205988	MXE	45735114-45735178~45795508-45795637;45852327-45852456~45956454-45956575
SE.4173	ENSMUSG00000020694.17	Tlk2	chr11	+	0.963	1	1	0.775	0.899	0.96	0.11	0.00115426	0.0206564	SE	105241568-105241661~105246773-105246884~105247458-105247595
SE.9933	ENSMUSG00000038861.14	Pi4kb	chr3	+	0.903	0.962	0.952	0.783	0.739	0.925	0.123	0.00115666	0.0206825	SE	94974730-94975085~94983982-94984919~94992965-94993193
SE.21666	ENSMUSG00000025894.11	Aasdhppt	chr9	-	0.923	1	1	0.9	0.836	0.885	0.101	0.00115847	0.0206981	SE	4302469-4302631~4308693-4308919~4309253-4309467
SE.5970	ENSMUSG00000030990.18	Pgap2	chr7	+	1	1	1	1	0.56	1	0.147	0.0011728	0.0209371	SE	102210361-102210591~102223378-102223490~102226270-102226445
SE.11259	ENSMUSG00000031626.18	Sorbs2	chr8	+	0.688	0.543	0.723	0.762	0.938	0.838	-0.195	0.0011749	0.0209524	SE	45805652-45805853~45809408-45810191~45819718-45819768
SE.18728	ENSMUSG00000042178.6	Armc5	chr7	+	1	1	1	0.926	0.826	0.931	0.106	0.00117557	0.0209524	SE	128240082-128240869~128242179-128242676~128243339-128243472
SE.21489	ENSMUSG00000027575.19	Arfgap1	chr2	+	0.74	0.471	0.713	0.879	0.763	0.936	-0.218	0.00117777	0.0209746	SE	180967233-180967329~180967601-180967814~180971050-180971114
SE.2772	ENSMUSG00000039599.16	Fam149b	chr14	+	1	0.88	0.767	1	1	1	-0.118	0.00118206	0.0210046	SE	20377774-20377999~20378399-20378523~20378763-20378883
SE.3748	ENSMUSG00000020954.16	Strn3	chr12	-	0.08	0.051	0.065	0.077	0.125	0.128	-0.045	0.00118107	0.0210046	SE	51629373-51629507~51633578-51633719~51647993-51648135
SE.12131	ENSMUSG00000040774.15	Cept1	chr3	-	0.289	0.047	0.362	0.734	0.39	1	-0.475	0.00118232	0.0210046	SE	106505720-106505852~106512802-106512887~106520008-106520093
SE.15043	ENSMUSG00000050565.16	Tor1aip2	chr1	+	1	1	0.877	0.811	0.811	0.704	0.184	0.00118481	0.0210319	SE	156035725-156035920~156041074-156041134~156051293-156051623
SE.12502	ENSMUSG00000039997.16	Ifi203	chr1	-	0.853	0.701	0.631	0.805	1	1	-0.207	0.00118579	0.0210322	SE	173926805-173927222~173928274-173929516~173935009-173935177
RI.1236	ENSMUSG00000021488.8	Nsd1	chr13	+	0.27	0.328	0.322	0.234	0.187	0.249	0.083	0.000906779	0.0210663	RI	55213203-55213317~55213203-55214150~55214060-55214150
RI.1886	ENSMUSG00000038671.15	Arfrp1	chr2	-	0.425	0.243	0.47	0.188	0.121	0.248	0.194	0.000900184	0.0210663	RI	181364013-181364096~181364013-181364398~181364310-181364398
SE.21298	ENSMUSG00000032355.16	Mlip	chr9	-	0.861	0.887	0.913	0.951	0.939	0.946	-0.058	0.0011905	0.0210987	SE	77190671-77190737~77229484-77230954~77239391-77239784
A5SS.102	ENSMUSG00000002274.13	Metrn	chr17	-	0.202	0.047	0.109	0.067	0.056	0	0.078	0.000822214	0.0212272	A5SS	25795373-25795433~25796085-25796240~25796240-25796641
A5SS.840	ENSMUSG00000006850.8	Tmco6	chr18	+	0	0	0	0.219	0.193	0	-0.137	0.000817764	0.0212272	A5SS	36737456-36737572~36737572-36737579~36737668-36737852
A5SS.1520	ENSMUSG00000019854.17	Reps1	chr10	+	0.731	0.468	0.686	0.915	0.73	0.966	-0.242	0.000822479	0.0212272	A5SS	18093778-18093840~18093840-18093903~18094409-18094572
A5SS.1601	ENSMUSG00000040263.16	Klhdc4	chr8	-	0.403	0.527	0.51	0.654	0.849	0.929	-0.331	0.000838282	0.0212272	A5SS	121820121-121820220~121821279-121821302~121821302-121821358
A5SS.1729	ENSMUSG00000032264.9	Zw10	chr9	+	0.022	0.098	0.245	0.045	0.018	0.027	0.092	0.0008458	0.0212272	A5SS	49069573-49069812~49069812-49069982~49071581-49071653
SE.2323	ENSMUSG00000013236.17	Ptprs	chr17	-	0.623	0.543	0.409	0.233	0.323	0.392	0.209	0.00120287	0.0212912	SE	56426386-56426504~56427790-56427817~56427938-56428132
SE.8994	ENSMUSG00000038733.14	Wdr26	chr1	-	0.141	0.092	0.137	0.07	0.085	0.065	0.05	0.00120416	0.0212912	SE	181177674-181177831~181180465-181180648~181181303-181181489
SE.12023	ENSMUSG00000025968.16	Ndufs1	chr1	-	0.04	0.043	0.053	0.104	0.085	0.067	-0.04	0.00120427	0.0212912	SE	63170848-63170914~63172153-63172257~63176427-63176524
SE.8581	ENSMUSG00000026463.17	Atp2b4	chr1	-	0.944	1	1	0.84	1	0.834	0.09	0.00120603	0.0213052	SE	133735047-133735209~133736615-133736651~133737989-133738118
A5SS.1282	ENSMUSG00000039652.16	Cpeb3	chr19	-	0.741	0.71	0.697	0.498	0.578	0.444	0.209	0.000861926	0.0213356	A5SS	37126331-37126388~37139061-37139130~37139130-37139221
SE.9875	ENSMUSG00000027180.12	Fbxo3	chr2	+	0.878	0.764	0.833	0.622	0.629	0.651	0.191	0.00120946	0.0213486	SE	104027843-104027966~104030358-104030433~104033595-104033759
A3SS.45	ENSMUSG00000036748.16	Cuedc2	chr19	-	1	0.385	1	0.484	0	0.319	0.527	0.000648496	0.0214779	A3SS	46338312-46338420~46338420-46338430~46338519-46338630
SE.14878	ENSMUSG00000020064.9	Herc4	chr10	+	0.121	0.052	0.07	0.043	0	0	0.067	0.00121848	0.0214906	SE	63245821-63246125~63249953-63250086~63264025-63264185
SE.387	ENSMUSG00000025006.18	Sorbs1	chr19	-	0.647	0.465	0.599	0.246	0.395	0.19	0.293	0.00122407	0.0215449	SE	40352517-40352565~40361041-40361104~40361428-40361503
SE.13693	ENSMUSG00000026730.12	Pter	chr2	+	0.885	1	1	1	0.598	0.852	0.145	0.0012245	0.0215449	SE	12924040-12924198~12974368-12974453~12978159-12978617
SE.19137	ENSMUSG00000057637.13	Prdm2	chr4	-	0.698	0.248	0.569	0.799	0.799	1	-0.361	0.00122368	0.0215449	SE	143170035-143170188~143179314-143179391~143180876-143180991
SE.17382	ENSMUSG00000030102.11	Itpr1	chr6	+	0.595	0.477	0.447	0.74	0.748	0.698	-0.222	0.00122605	0.0215549	SE	108363609-108363705~108365298-108365343~108369010-108369165
SE.20505	ENSMUSG00000031788.14	Kifc3	chr8	-	1	1	1	0.856	0.959	0.933	0.084	0.00123005	0.021608	SE	95099827-95100452~95100646-95100673~95101408-95101517
SE.9974	ENSMUSG00000002731.6	Prkra	chr2	-	1	0.796	0.678	0.917	1	1	-0.148	0.00124237	0.0218069	SE	76643222-76643304~76647124-76647294~76647791-76648015
A5SS.791	ENSMUSG00000068040.10	Tm9sf4	chr2	+	0.978	0.874	0.868	1	0.977	0.983	-0.08	0.000917221	0.0220989	A5SS	153188953-153189049~153189049-153189077~153190830-153190949
A5SS.1687	ENSMUSG00000031728.10	Zfp821	chr8	+	0.64	0	1	1	0.816	1	-0.392	0.000913087	0.0220989	A5SS	109717761-109717887~109717887-109717906~109721194-109721343
A3SS.2614	ENSMUSG00000027763.13	Mbnl1	chr3	+	0.983	0.993	0.99	0.955	0.865	1	0.049	0.000675265	0.022124	A3SS	60614682-60614736~60615619-60615724~60615724-60615773
SE.14715	ENSMUSG00000060279.14	Ap2a1	chr7	-	0.012	0	0	0.014	0.007	0.102	-0.037	0.00126232	0.0221394	SE	44916401-44916470~44923806-44923915~44929279-44929466
SE.11849	ENSMUSG00000029086.15	Prom1	chr5	-	1	1	1	0.797	0.542	1	0.22	0.00126825	0.0222258	SE	44016565-44016650~44018292-44018396~44020807-44020931
SE.3315	ENSMUSG00000071984.11	Fndc1	chr17	-	0.86	1	1	0.76	0.792	0.709	0.2	0.00127378	0.0222927	SE	7788993-7789200~7801567-7801654~7804826-7805021
SE.16705	ENSMUSG00000029925.13	Tbxas1	chr6	+	1	1	1	0.742	0	0	0.753	0.0012741	0.0222927	SE	39080938-39081076~39083692-39083855~39084295-39084585
A3SS.457	ENSMUSG00000021275.16	Tecpr2	chr12	+	0.687	0.852	0.788	1	1	1	-0.224	0.000698292	0.0223968	A3SS	110918868-110919026~110926163-110926195~110926195-110926476
A3SS.2660	ENSMUSG00000014873.15	Surf2	chr2	+	1	1	1	0.584	0.495	1	0.307	0.000693258	0.0223968	A3SS	26917427-26917531~26918864-26918928~26918928-26919055
SE.8847	ENSMUSG00000026074.15	Map4k4	chr1	+	0.542	0.812	0.714	1	0.929	0.867	-0.243	0.00128338	0.0224372	SE	40001429-40001591~40003756-40003987~40004806-40004913
SE.5818	ENSMUSG00000036323.14	Srp72	chr5	+	0	0	0	0.041	0.027	0.28	-0.116	0.00128598	0.0224578	SE	76997404-76997582~76998015-76998097~76998191-76998341
SE.11103	ENSMUSG00000021079.16	Timm9	chr12	-	0.402	0.839	0.327	0.149	0.099	0.172	0.383	0.0012866	0.0224578	SE	71132000-71132086~71132506-71132758~71136554-71136597
SE.12367	ENSMUSG00000027634.14	Ndrg3	chr2	-	1	1	1	0.964	0.909	0.94	0.062	0.00130745	0.0228036	SE	156950033-156950139~156958466-156958502~156970036-156970138
SE.13817	ENSMUSG00000056763.16	Cspp1	chr1	+	1	0.633	0.633	0.223	0.775	0	0.423	0.00130882	0.0228094	SE	10058719-10058823~10059823-10059847~10064332-10064413
A3SS.1634	ENSMUSG00000036391.16	Sec24a	chr11	-	0.859	0.746	0.704	0.943	0.907	0.907	-0.149	0.000721897	0.0229127	A3SS	51729451-51729575~51729575-51729578~51731802-51731905
SE.3447	ENSMUSG00000021693.20	Kif2a	chr13	-	0.481	0.688	0.595	0.303	0.392	0.319	0.25	0.00131994	0.0229668	SE	106968637-106968788~106969703-106969817~106974494-106974562
SE.20750	ENSMUSG00000022629.17	Kif21a	chr15	-	1	0.76	0.665	1	1	0.856	-0.144	0.00131964	0.0229668	SE	90943764-90943901~90949005-90949044~90952710-90952818
A5SS.763	ENSMUSG00000038733.14	Wdr26	chr1	-	0.426	0.605	0.55	0.355	0.395	0.362	0.156	0.000967905	0.0230132	A5SS	181203023-181203160~181209002-181209050~181209050-181209107
A3SS.573	ENSMUSG00000020737.12	Jpt1	chr11	-	0.209	0.442	0	0.209	0.442	1	-0.333	0.000746375	0.0231076	A3SS	115500665-115500684~115500684-115500723~115502004-115502102
A3SS.2084	ENSMUSG00000003099.11	Ppp5c	chr7	-	1	0.952	0.696	1	1	1	-0.117	0.000738326	0.0231076	A3SS	17008613-17008712~17008712-17009058~17009874-17009996
A3SS.2180	ENSMUSG00000029422.15	Rsrc2	chr5	-	0.466	1	1	0.615	0	0.272	0.526	0.000750788	0.0231076	A3SS	123740671-123740862~123740862-123740884~123742778-123742856
RI.2072	ENSMUSG00000029718.14	Pcolce	chr5	-	0.06	0.105	0.077	0.06	0.044	0.042	0.032	0.00100704	0.0232099	RI	137605722-137605800~137605722-137607107~137606826-137607107
SE.6292	ENSMUSG00000042254.14	Cilp	chr9	+	1	1	0.827	0.971	0.898	0.705	0.084	0.00133574	0.0232232	SE	65265179-65265223~65265812-65265850~65267041-65267192
SE.14941	ENSMUSG00000028837.8	Psmb2	chr4	+	1	0.986	0.975	0.941	0.966	0.936	0.039	0.00133942	0.0232689	SE	126677629-126677845~126684121-126684244~126687028-126687099
A5SS.289	ENSMUSG00000097451.11	Rian	chr12	+	1	1	0.778	0.874	0.908	0.881	0.038	0.00100678	0.0233237	A5SS	109627047-109627132~109627132-109627153~109635393-109635457
A5SS.1741	ENSMUSG00000047766.15	Lrrc49	chr9	-	1	1	0	0.29	0	0.234	0.492	0.00100648	0.0233237	A5SS	60610257-60610421~60614998-60615093~60615093-60615177
SE.12006	ENSMUSG00000014592.21	Camta1	chr4	-	0.068	0	0.128	0.119	0.176	0.038	-0.046	0.00135323	0.0234901	SE	151075091-151075285~151076576-151076597~151077863-151077935
RI.789	ENSMUSG00000049606.16	Zfp644	chr5	-	0.609	0.649	0.337	0.764	0.805	0.812	-0.262	0.00102905	0.0235305	RI	106635609-106636323~106635609-106638635~106636416-106638635
A3SS.1280	ENSMUSG00000026074.15	Map4k4	chr1	+	0.837	0.915	1	0.601	0.524	0.836	0.264	0.000781898	0.0235609	A3SS	40004806-40004913~40006670-40006673~40006673-40006822
A3SS.2796	ENSMUSG00000074247.10	Dda1	chr8	+	1	0.773	0.732	1	1	0.843	-0.113	0.000777341	0.0235609	A3SS	71469198-71469325~71472036-71472040~71472040-71472117
A3SS.2817	ENSMUSG00000115987.1	Vps28	chr15	-	0.019	0.01	0	0.045	0.02	0.083	-0.04	0.000788715	0.0235609	A3SS	76624591-76624620~76624620-76624718~76625133-76625205
SE.5626	ENSMUSG00000026950.18	Neb	chr2	-	0.787	0.872	0.826	0.414	0.712	0.471	0.296	0.00136193	0.0236039	SE	52149589-52149697~52150966-52151059~52157831-52157912
SE.9306	ENSMUSG00000063382.6	Bcl9l	chr9	+	0.715	0.814	0.952	0.573	0.59	0.607	0.237	0.00136126	0.0236039	SE	44482865-44483486~44499447-44499549~44500744-44500800
SE.4762	ENSMUSG00000020359.13	Phykpl	chr11	+	1	1	1	1	0.842	0.808	0.117	0.00136349	0.0236123	SE	51598275-51598430~51598650-51598740~51599465-51599596
A5SS.449	ENSMUSG00000034175.13	Rhbdd3	chr11	+	1	1	1	0.891	0.936	0.71	0.154	0.00103765	0.0237346	A5SS	5105180-5105313~5105313-5105347~5105432-5105717
SE.6988	ENSMUSG00000025648.18	Pfkfb4	chr9	+	1	0.969	1	0.984	0.941	0.91	0.045	0.00137248	0.0237435	SE	109027744-109027807~109028893-109028958~109030328-109030712
SE.13995	ENSMUSG00000051747.15	Ttn	chr2	-	0.187	0.087	0.114	0.208	0.47	0.273	-0.188	0.00137322	0.0237435	SE	76828100-76828187~76828318-76828402~76831787-76831874
A3SS.1842	ENSMUSG00000001632.16	Brpf1	chr6	+	0.151	0	0	0.131	0.246	0.495	-0.24	0.000808981	0.0238029	A3SS	113318411-113318721~113319037-113319040~113319040-113319361
A3SS.3043	ENSMUSG00000045409.16	Trim39	chr17	-	0	0.156	0	0.122	0.624	0.217	-0.269	0.000812439	0.0238029	A3SS	36263728-36263959~36263959-36264080~36267124-36267220
SE.8714	ENSMUSG00000029778.12	Adcyap1r1	chr6	+	0.391	0.084	0.461	0.719	1	0.681	-0.488	0.00137794	0.0238063	SE	55484941-55485033~55491226-55491310~55494076-55494206
SE.4083	ENSMUSG00000020744.13	Slc25a19	chr11	-	0.015	0.014	0.018	0.105	0.026	0.022	-0.035	0.00138531	0.0239149	SE	115620876-115621047~115623417-115623592~115623871-115624027
SE.11682	ENSMUSG00000034940.15	Synrg	chr11	+	0.886	0.876	0.948	0.632	0.87	0.696	0.171	0.00139241	0.0240184	SE	84039210-84039321~84039655-84039691~84040796-84040928
SE.21863	ENSMUSG00000019878.8	Hsf2	chr10	+	0.424	0.612	0.632	0.41	0.125	0.261	0.291	0.00139718	0.0240818	SE	57506196-57506302~57509060-57509114~57511443-57511528
SE.8849	ENSMUSG00000026074.15	Map4k4	chr1	+	0.091	0.815	0.681	1	0.894	0.808	-0.372	0.00140129	0.0241249	SE	40001429-40001591~40003762-40003987~40004806-40004910
SE.19440	ENSMUSG00000046897.17	Zfp740	chr15	+	0.947	1	0.856	0.688	0.869	0.717	0.176	0.00140187	0.0241249	SE	102204570-102205086~102205228-102205305~102207770-102207920
SE.4561	ENSMUSG00000020821.17	Kif1c	chr11	+	0.37	0.373	0.438	0.447	0.553	0.469	-0.096	0.00141558	0.0243417	SE	70700547-70700709~70702445-70702551~70702771-70702905
SE.13674	ENSMUSG00000057897.14	Camk2b	chr11	-	1	1	1	0.967	0.829	0.945	0.086	0.00141795	0.0243635	SE	5972812-5972888~5976764-5976893~5977811-5977940
SE.17255	ENSMUSG00000060012.9	Kif13b	chr14	+	0.877	1	0.758	1	1	1	-0.122	0.0014203	0.0243847	SE	64779690-64779768~64782341-64782395~64788407-64788519
SE.6166	ENSMUSG00000020160.18	Meis1	chr11	-	1	1	1	0.697	0.682	1	0.207	0.00142249	0.0244033	SE	18880661-18881922~18883987-18884082~18884386-18884476
SE.15584	ENSMUSG00000038145.17	Snrk	chr9	+	0.439	0.471	0.502	0.166	0.175	0.413	0.219	0.00142689	0.0244597	SE	122132627-122132750~122133960-122134076~122136905-122137176
A3SS.532	ENSMUSG00000062054.7	Iah1	chr12	+	0.892	1	1	0.888	1	0.712	0.097	0.000851495	0.0244765	A3SS	21317375-21317428~21317897-21317929~21317929-21318046
A3SS.1392	ENSMUSG00000026626.11	Ppp2r5a	chr1	-	0.08	0.078	0.074	0.036	0.035	0.007	0.051	0.000851087	0.0244765	A3SS	191358924-191359055~191359055-191359079~191362248-191362341
A3SS.2369	ENSMUSG00000030067.17	Foxp1	chr6	-	0.809	0.839	0.844	0.548	0.558	0.632	0.251	0.000859646	0.0244798	A3SS	98945346-98945423~98945423-98945426~98945533-98945735
SE.7118	ENSMUSG00000070972.13	Dnajc25	chr4	+	0.368	0.334	0.616	0.174	0.167	0.151	0.275	0.00143111	0.0245129	SE	59003192-59003557~59013631-59013855~59017669-59017822
RI.681	ENSMUSG00000020377.15	Ltc4s	chr11	-	0.371	0	0.249	0	0	0.117	0.168	0.00108368	0.0245861	RI	50237193-50237264~50237193-50237440~50237340-50237440
A3SS.1483	ENSMUSG00000028541.14	B4galt2	chr4	-	0	0	0	0.119	0.802	0	-0.307	0.000873799	0.0246525	A3SS	117881314-117881670~117881670-117881705~117881775-117881817
A3SS.1044	ENSMUSG00000048000.15	Gigyf2	chr1	+	0.144	0.296	0	0.457	0.219	0.457	-0.231	0.000882418	0.0246672	A3SS	87436768-87436891~87440359-87440387~87440387-87440612
SE.13723	ENSMUSG00000027022.14	Xirp2	chr2	+	0.99	0.988	0.988	0.987	0.976	0.97	0.011	0.00145082	0.0248311	SE	67476717-67476866~67505502-67505575~67507046-67507180
MXE.1340	ENSMUSG00000061462.18	Obscn	chr11	-	0.363	0.408	0.524	0.344	0.286	0.237	0.143	0.00229442	0.0248882	MXE	59054773-59055037~59055376-59055640;59055960-59056224~59067065-59067329
SE.8823	ENSMUSG00000026643.16	Nmt2	chr2	+	0.823	0.91	1	0.595	0.895	0.261	0.327	0.00147117	0.0251406	SE	3304811-3304947~3305396-3305439~3309466-3309611
SE.10321	ENSMUSG00000021147.17	Wdr37	chr13	-	0.218	0.032	0	0.045	0.016	0	0.063	0.00147119	0.0251406	SE	8861135-8861265~8870636-8870716~8870869-8871007
SE.9442	ENSMUSG00000055296.14	Tmem245	chr4	-	1	0.964	1	1	0.956	0.795	0.071	0.00148346	0.0253307	SE	56888534-56888709~56890799-56890900~56899025-56899171
SE.21487	ENSMUSG00000027575.19	Arfgap1	chr2	+	0.697	0.381	0.651	0.861	0.736	0.904	-0.257	0.00148712	0.0253734	SE	180967244-180967329~180967533-180967814~180971050-180971114
SE.10911	ENSMUSG00000051984.13	Sec31b	chr19	-	1	0.944	0.97	0.914	0.622	0.949	0.143	0.00149538	0.0254945	SE	44536057-44536253~44543265-44543389~44543700-44543812
SE.6097	ENSMUSG00000062822.8	4833420G17Rik	chr13	+	0.04	0.083	0.047	0.153	0.04	0.303	-0.109	0.00149703	0.0255029	SE	119462771-119463119~119464564-119464690~119466010-119466304
SE.4882	ENSMUSG00000056342.16	Usp34	chr11	+	0.653	0.879	0.92	0.556	0.554	0.64	0.234	0.00149896	0.0255159	SE	23361586-23361716~23362576-23362612~23363057-23363188
SE.7698	ENSMUSG00000034832.15	Tet3	chr6	-	0.967	1	1	0.886	0.938	0.879	0.088	0.00150092	0.0255296	SE	83402666-83404824~83441216-83441273~83454749-83455480
SE.499	ENSMUSG00000024668.8	Sdhaf2	chr19	-	0	1	0.734	0.892	1	1	-0.386	0.00150635	0.0256021	SE	10516979-10517089~10517319-10517386~10525058-10525092
RI.685	ENSMUSG00000020282.18	Rhbdf1	chr11	-	0.119	0.3	0.194	0.055	0.078	0	0.16	0.00114111	0.0256882	RI	32212622-32212784~32212622-32212942~32212867-32212942
SE.12377	ENSMUSG00000068823.10	Csde1	chr3	+	0.331	0.312	0.317	0.36	0.401	0.51	-0.104	0.0015299	0.0259823	SE	103039932-103040042~103040440-103040533~103041144-103041242
SE.7361	ENSMUSG00000039246.8	Lyplal1	chr1	-	0.721	1	1	0.748	0.522	0.721	0.243	0.00153178	0.0259942	SE	186089443-186089559~186100192-186100362~186114263-186114363
RI.1979	ENSMUSG00000027569.15	Mrgbp	chr2	+	0.678	0.771	0.387	1	1	1	-0.388	0.00116381	0.0259977	RI	180584405-180584487~180584405-180584871~180584693-180584871
A5SS.453	ENSMUSG00000024581.13	Napg	chr18	+	0.174	0	0	0.48	0.526	0	-0.277	0.00118957	0.0263006	A5SS	62984039-62984070~62984070-62984123~62986178-62986288
A5SS.609	ENSMUSG00000035325.16	Sec31a	chr5	-	0.194	0.167	0.11	0.308	0.301	0.285	-0.141	0.00116469	0.0263006	A5SS	100368293-100368352~100373379-100373424~100373424-100373715
A5SS.1018	ENSMUSG00000044768.16	D1Ertd622e	chr1	-	0.831	1	0.649	0.552	1	0.235	0.231	0.0011935	0.0263006	A5SS	97654599-97654689~97660730-97661554~97661554-97661676
SE.13078	ENSMUSG00000041757.17	Plekha6	chr1	+	0.507	0.733	0.673	1	1	1	-0.362	0.0015563	0.026385	SE	133279372-133279453~133280338-133280407~133281782-133281811
SE.14336	ENSMUSG00000051747.15	Ttn	chr2	-	0.875	0.899	0.837	0.92	0.837	0.958	-0.035	0.00155721	0.026385	SE	76857903-76857987~76862349-76862427~76862799-76862859
RI.339	ENSMUSG00000024327.16	Slc39a7	chr17	-	0.078	0.062	0.222	0.075	0.044	0.007	0.079	0.00120451	0.0264993	RI	34030089-34030254~34030089-34030421~34030367-34030421
RI.2190	ENSMUSG00000020899.16	Pfas	chr11	-	0.053	0.074	0.035	0.175	0.285	0.065	-0.121	0.00120068	0.0264993	RI	68992915-68993038~68992915-68993458~68993296-68993458
SE.11780	ENSMUSG00000022131.3	Gpr180	chr14	+	1	1	1	0.892	0.979	0.95	0.06	0.00156832	0.0265527	SE	118139736-118139895~118148084-118148285~118153568-118153749
A5SS.733	ENSMUSG00000035443.10	Thyn1	chr9	+	1	1	1	0.813	1	0.892	0.098	0.00122092	0.0265808	A5SS	27003596-27003764~27003764-27003778~27005145-27005214
SE.19535	ENSMUSG00000070371.11	Prss36	chr7	-	0.873	0.86	1	0.575	0.904	0.457	0.266	0.00157801	0.0266837	SE	127933370-127933492~127933566-127933832~127934389-127934627
SE.21004	ENSMUSG00000032114.9	Slc37a4	chr9	+	1	1	0.941	0.928	0.902	0.826	0.095	0.00157848	0.0266837	SE	44401420-44401534~44401706-44401769~44402072-44402211
SE.3056	ENSMUSG00000033102.15	Cdc14b	chr13	-	1	0	1	0.529	0	0.584	0.296	0.00158556	0.0267827	SE	64196979-64197045~64201331-64201448~64205270-64205417
SE.1746	ENSMUSG00000080717.10	B230307C23Rik	chr16	+	0.13	0	0	0.3	1	0.273	-0.481	0.00159525	0.026905	SE	98008943-98009004~98010118-98010168~98015665-98015719
SE.11218	ENSMUSG00000028906.17	Epb41	chr4	-	0.648	0.566	0.446	0.168	0	1	0.164	0.00159463	0.026905	SE	131937014-131937464~131955542-131955578~131957642-131957819
A3SS.1052	ENSMUSG00000034724.18	Cnot6l	chr5	-	0.94	1	1	0.937	0.864	0.866	0.091	0.000976204	0.0269688	A3SS	96131058-96131241~96131241-96131245~96134010-96134132
A3SS.2734	ENSMUSG00000028060.14	Khdc4	chr3	+	0.662	0.662	0.384	0.723	0.815	1	-0.277	0.000982454	0.0269688	A3SS	88699950-88700008~88700361-88700364~88700364-88700514
SE.1726	ENSMUSG00000022789.15	Dnm1l	chr16	-	0.072	0.055	0.023	0.291	0.105	0.323	-0.19	0.00160093	0.0269801	SE	16316601-16316778~16318444-16318477~16319451-16319508
RI.494	ENSMUSG00000021281.15	Tnfaip2	chr12	+	0.073	0.033	0.069	0.16	0.15	0.058	-0.064	0.00124086	0.0270936	RI	111448246-111448369~111448246-111448639~111448538-111448639
SE.11118	ENSMUSG00000040964.16	Arhgef10l	chr4	-	0.031	0.009	0	0.05	0.045	0.05	-0.035	0.00162445	0.0273555	SE	140546999-140547086~140551795-140551920~140552527-140552649
A3SS.576	ENSMUSG00000020614.13	Fam20a	chr11	-	0	0	0.109	0	0.375	0.176	-0.147	0.00101112	0.027508	A3SS	109675842-109675952~109675952-109675977~109677153-109677334
A5SS.233	ENSMUSG00000042323.17	Pbrm1	chr14	+	1	0.654	1	0.825	0.654	0	0.392	0.00127984	0.0275318	A5SS	31023066-31023170~31023170-31023179~31025500-31025650
SE.9781	ENSMUSG00000020257.13	Wdr82	chr9	+	0.904	0.917	0.9	0.975	1	1	-0.085	0.00164363	0.0276574	SE	106180565-106180632~106183615-106183715~106184179-106184296
SE.870	ENSMUSG00000041225.16	Arhgap12	chr18	-	0.377	0.6	0.538	0.211	0.157	0.308	0.28	0.00164862	0.02772	SE	6052861-6052923~6057516-6057591~6061846-6061972
MXE.928	ENSMUSG00000030409.16	Dmpk	chr7	+	0.201	0.282	0.198	0.328	0.253	0.355	-0.085	0.00256832	0.0277227	MXE	19091938-19092036~19092207-19092254;19092546-19092632~19092949-19093416
SE.13297	ENSMUSG00000061462.18	Obscn	chr11	-	0.779	0.926	1	0.665	0.721	0.766	0.184	0.0016595	0.0278817	SE	59090507-59090783~59093295-59093571~59106294-59106570
SE.3785	ENSMUSG00000021144.14	Mta1	chr12	+	0.46	0.528	0.446	0.723	0.679	0.73	-0.233	0.00166688	0.0279843	SE	113116987-113117081~113120210-113120261~113120826-113120953
SE.17531	ENSMUSG00000040669.14	Phc1	chr6	-	0.873	1	1	0.797	1	0.62	0.152	0.00167141	0.0280389	SE	122325457-122325950~122332521-122332677~122333290-122333440
MXE.573	ENSMUSG00000026950.18	Neb	chr2	-	0.782	0.818	0.67	0.595	0.687	0.686	0.101	0.0026131	0.0280685	MXE	52150536-52150629~52153055-52153148;52156354-52156447~52157290-52157383
SE.5017	ENSMUSG00000034354.17	Mtmr3	chr11	-	0.482	0.53	0.677	0.423	0.374	0.314	0.193	0.00167912	0.0281468	SE	4485362-4485451~4485878-4485989~4487233-4488632
A5SS.725	ENSMUSG00000027722.14	Spata5	chr3	+	0	0	0	0.048	0.167	0.218	-0.144	0.00133173	0.028311	A5SS	37433137-37433267~37433267-37433283~37433638-37433695
SE.15032	ENSMUSG00000040029.15	Ipo8	chr6	-	0.858	0.84	0.95	0.939	1	1	-0.097	0.00170573	0.028571	SE	148804621-148804721~148806384-148806519~148809879-148809964
MXE.1977	ENSMUSG00000038244.14	Mical2	chr7	+	0.483	0.507	0.483	0.747	0.632	0.678	-0.195	0.00272023	0.0289369	MXE	112335328-112335430~112336848-112336974;112345245-112345353~112346721-112346908
MXE.2104	ENSMUSG00000035164.8	Zc3h12c	chr9	-	0.765	0.703	0.66	0.546	0.507	0.495	0.193	0.00271393	0.0289369	MXE	52111343-52116802~52117538-52117645;52120156-52120391~52126562-52126702
MXE.1584	ENSMUSG00000037857.16	Nufip2	chr11	+	0.864	0.941	0.933	0.952	0.965	0.968	-0.049	0.00274126	0.0290204	MXE	77686154-77686507~77691541-77693254;77705508-77705541~77709682-77712741
SE.18699	ENSMUSG00000030505.17	Prmt3	chr7	+	0.949	0.927	1	0.931	0.674	1	0.09	0.00173563	0.0290496	SE	49791972-49792038~49798305-49798427~49818031-49818110
SE.5141	ENSMUSG00000033417.16	Cacul1	chr19	-	0.937	0.979	1	0.925	0.754	0.959	0.093	0.00174628	0.0291913	SE	60534135-60534274~60537413-60537503~60543009-60543112
SE.21196	ENSMUSG00000032384.16	Csnk1g1	chr9	+	0	0.633	0.256	0.073	0	0	0.272	0.00174675	0.0291913	SE	66032238-66032345~66035049-66035073~66039576-66039729
SE.8101	ENSMUSG00000040481.17	Bptf	chr11	-	0.052	0.026	0.015	0.069	0.133	0.061	-0.057	0.00174902	0.0292071	SE	107061683-107061835~107062049-107062211~107062535-107062782
SE.15917	ENSMUSG00000069094.12	Pde7a	chr3	-	0.977	1	0.925	0.865	0.846	0.941	0.083	0.00175111	0.0292197	SE	19235912-19236013~19236443-19236539~19256777-19256861
RI.1974	ENSMUSG00000031917.12	Nip7	chr8	+	0.15	0.11	0.331	0	0	0.081	0.17	0.00135286	0.0293187	RI	107057092-107057179~107057092-107057411~107057272-107057411
A3SS.1754	ENSMUSG00000039221.10	Rpl22l1	chr3	+	0.35	0.121	0.257	0.708	0.75	0.554	-0.428	0.00109828	0.0294465	A3SS	28806499-28806592~28806669-28806736~28806736-28806858
A3SS.2831	ENSMUSG00000033249.10	Hsf4	chr8	+	1	0.892	1	0.756	1	0.78	0.119	0.00110171	0.0294465	A3SS	105272459-105272584~105272705-105272809~105272809-105272933
SE.9874	ENSMUSG00000027180.12	Fbxo3	chr2	+	0.967	0.941	0.955	0.877	0.899	0.911	0.059	0.00177599	0.0296125	SE	104027720-104027966~104030343-104030433~104033595-104033759
MXE.747	ENSMUSG00000036073.17	Galt	chr4	+	0.512	0.715	0.661	0.732	0.904	0.873	-0.207	0.00281722	0.0296819	MXE	41756512-41756561~41756681-41756811;41756938-41756995~41757155-41757278
SE.7806	ENSMUSG00000002524.17	Puf60	chr15	-	0.357	0.316	0.053	0	0.1	0.058	0.189	0.00178761	0.0297815	SE	76077600-76077702~76079369-76079489~76080849-76080904
SE.17879	ENSMUSG00000035203.16	Epn1	chr7	+	1	1	0.991	0.933	0.918	1	0.047	0.00178884	0.0297815	SE	5080234-5080477~5082017-5082121~5083729-5083982
SE.5719	ENSMUSG00000026950.18	Neb	chr2	-	0.371	0.503	0.398	0.536	0.484	0.59	-0.113	0.00179302	0.0298285	SE	52153055-52153148~52157290-52157383~52157831-52157912
SE.15000	ENSMUSG00000025157.8	Zdhhc16	chr19	+	0.486	0.806	0.602	0.171	0.431	0.149	0.381	0.00179439	0.0298287	SE	41939599-41939733~41939856-41939904~41940649-41940713
SE.15124	ENSMUSG00000050812.18	Ecpas	chr4	-	0.627	0.68	0.536	0.415	0.385	0.542	0.167	0.00179937	0.0298888	SE	58885367-58885498~58905003-58905107~58911868-58911927
MXE.705	ENSMUSG00000037523.13	Mavs	chr2	+	0.231	0.341	0.269	0.538	0.342	0.449	-0.163	0.00287051	0.0300603	MXE	131234104-131234355~131238735-131238910;131240314-131240492~131241879-131242049
MXE.885	ENSMUSG00000026767.12	Mindy3	chr2	-	0.654	1	1	0.557	1	0.611	0.162	0.00288044	0.0300603	MXE	12400022-12400137~12401024-12401076;12403997-12404168~12405859-12405920
SE.6370	ENSMUSG00000021906.14	Oxnad1	chr14	+	0.924	1	1	0.885	1	0.814	0.075	0.00181293	0.0300913	SE	32085375-32085566~32085848-32086053~32091635-32091759
SE.6922	ENSMUSG00000040785.19	Ttc3	chr16	+	1	1	1	1	0.359	0.804	0.279	0.00181512	0.030105	SE	94454426-94454523~94456710-94456761~94457320-94457411
SE.7737	ENSMUSG00000096687.8	Mfsd4b4	chr10	-	0.136	0.371	0.191	0.47	1	0.586	-0.453	0.00182221	0.0301789	SE	39894771-39894940~39895511-39895996~39898913-39899215
SE.19757	ENSMUSG00000025147.7	Mob2	chr7	-	0.56	0.145	0.347	1	0	0	0.017	0.00182232	0.0301789	SE	142016344-142016505~142024273-142024476~142025829-142026075
SE.2086	ENSMUSG00000033565.18	Rbfox2	chr15	-	0.022	0.066	0.101	0.024	0	0.019	0.049	0.00182602	0.0302173	SE	77091811-77091854~77094450-77094490~77097939-77098072
SE.1146	ENSMUSG00000003929.11	Zfp81	chr17	-	0.333	0	0	0.499	0.166	0.333	-0.222	0.00183071	0.0302495	SE	33336721-33336848~33338100-33338251~33358733-33358868
SE.1845	ENSMUSG00000075704.16	Txnrd2	chr16	+	1	1	1	0.887	0.712	1	0.134	0.00183006	0.0302495	SE	18472153-18472249~18472793-18472886~18474681-18474687
SE.7559	ENSMUSG00000045962.16	Wnk1	chr6	-	0.099	0.126	0.144	0.198	0.285	0.157	-0.09	0.00183456	0.0302675	SE	119951897-119951995~119953770-119953902~119956070-119956170
SE.14806	ENSMUSG00000027257.13	Pacsin3	chr2	+	0.967	1	1	0.844	0.924	0.949	0.083	0.00183366	0.0302675	SE	91256301-91256343~91259867-91259927~91260170-91260261
RI.2090	ENSMUSG00000026199.17	Ankzf1	chr1	+	0.085	0	0.218	0.177	0.182	0.157	-0.071	0.00140787	0.0302848	RI	75194840-75194943~75194840-75195712~75195062-75195712
SE.14160	ENSMUSG00000051747.15	Ttn	chr2	-	0.156	0.208	0.188	0.116	0.148	0.144	0.048	0.00184005	0.0303353	SE	76844204-76844279~76847112-76847196~76847387-76847471
RI.2382	ENSMUSG00000099689.6	Zfp383	chr7	+	0.271	0.403	0.382	0.482	0.881	0.753	-0.353	0.00142259	0.0303765	RI	29912168-29912295~29912168-29912685~29912589-29912685
SE.12673	ENSMUSG00000030562.17	Nox4	chr7	+	1	1	1	0.883	0.849	0.938	0.11	0.00185353	0.0305347	SE	87323632-87323797~87323932-87323995~87338956-87339017
SE.11908	ENSMUSG00000009995.17	Taz	chrX	+	0.516	0.172	0.438	0.384	0	0	0.247	0.00185578	0.0305487	SE	74288450-74288513~74288928-74289019~74289104-74289182
SE.7944	ENSMUSG00000029920.9	Smarcad1	chr6	+	0.032	0	0	0.095	0.05	0.388	-0.167	0.00185743	0.0305531	SE	65043205-65043445~65050042-65050129~65052619-65052660
SE.4255	ENSMUSG00000014195.16	Dnajc7	chr11	-	0.06	0.061	0.128	0.028	0.011	0.038	0.057	0.00186446	0.0306241	SE	100584981-100585055~100589678-100589778~100589897-100589989
SE.20390	ENSMUSG00000001419.17	Mef2d	chr3	+	0.995	1	0.99	1	1	0.839	0.049	0.00186556	0.0306241	SE	88156321-88156525~88158220-88158355~88159121-88159332
SE.20580	ENSMUSG00000037300.19	Ttc13	chr8	-	0.684	1	1	0.622	1	0.072	0.33	0.00186593	0.0306241	SE	124695635-124695752~124697993-124698086~124699655-124699721
SE.21765	ENSMUSG00000025786.17	Zdhhc3	chr9	-	0.937	0.937	0.99	0.911	0.858	0.922	0.058	0.00187921	0.030819	SE	123082847-123084310~123089031-123089156~123100262-123100592
SE.20330	ENSMUSG00000031540.14	Kat6a	chr8	+	1	1	1	0.888	0.855	0.944	0.104	0.00188175	0.0308378	SE	22919324-22919440~22923514-22923656~22925280-22925442
SE.15027	ENSMUSG00000045302.13	Preb	chr5	-	1	1	1	0.607	0.764	1	0.21	0.00189351	0.0310073	SE	30954997-30955737~30957887-30958061~30958470-30958551
RI.932	ENSMUSG00000028600.15	Podn	chr4	-	0.239	0.293	0.229	0.14	0.185	0.154	0.094	0.00146695	0.031095	RI	108022480-108022637~108022480-108023412~108023302-108023412
RI.877	ENSMUSG00000027677.17	Ttc14	chr3	+	0.91	0.67	0.704	1	0.803	1	-0.173	0.0014819	0.0311842	RI	33800190-33800436~33800190-33800674~33800581-33800674
RI.327	ENSMUSG00000033088.19	Triobp	chr15	+	0.071	0.021	0.029	0.056	0.055	0.097	-0.029	0.00149906	0.0313184	RI	78991328-78991438~78991328-78993432~78992903-78993432
A3SS.1063	ENSMUSG00000028249.15	Sdcbp	chr4	+	0.823	0.873	0.972	0.773	0.786	0.563	0.182	0.00118311	0.0313472	A3SS	6380989-6381099~6385025-6385028~6385028-6385187
RI.1252	ENSMUSG00000029385.14	Ccng2	chr5	+	0.032	0	0.089	0.128	0.109	0.08	-0.065	0.00152689	0.0314474	RI	93270793-93271044~93270793-93271279~93271200-93271279
RI.1369	ENSMUSG00000029071.16	Dvl1	chr4	+	0.065	0.048	0.087	0.159	0.081	0.108	-0.049	0.0015253	0.0314474	RI	155854565-155855025~155854565-155855180~155855103-155855180
A5SS.327	ENSMUSG00000062929.8	Cfl2	chr12	-	0.445	0.413	0.475	0.373	0.328	0.34	0.097	0.00149923	0.0315012	A5SS	54861336-54861413~54861668-54861779~54861779-54861833
SE.20602	ENSMUSG00000033545.14	Znrf1	chr8	+	0.976	1	1	0.959	0.954	0.94	0.041	0.00192585	0.0315134	SE	111536236-111537564~111609292-111609388~111619205-111619311
RI.1897	ENSMUSG00000027349.5	Fam98b	chr2	+	0.075	0.148	0.061	0.062	0.034	0.038	0.05	0.00154111	0.0315167	RI	117257633-117257779~117257633-117259355~117259220-117259355
SE.7313	ENSMUSG00000040842.17	Szrd1	chr4	-	0.447	0.473	0.502	0.294	0.417	0.257	0.151	0.00193148	0.031582	SE	141118526-141118781~141120323-141120373~141139691-141139727
SE.8373	ENSMUSG00000015882.18	Lcorl	chr5	-	0.506	0.381	1	1	1	0.787	-0.3	0.00193651	0.0316407	SE	45697180-45701997~45735730-45735824~45747055-45747307
SE.4247	ENSMUSG00000019302.16	Atp6v0a1	chr11	+	1	1	0.973	0.896	0.981	0.954	0.047	0.00194749	0.0317516	SE	101044515-101044623~101048417-101048525~101055025-101055143
SE.11074	ENSMUSG00000022558.16	Mroh1	chr15	+	0.016	0.015	0.036	0.118	0.112	0.04	-0.068	0.00194639	0.0317516	SE	76446515-76447365~76448752-76448999~76450085-76450223
SE.13324	ENSMUSG00000061462.18	Obscn	chr11	-	0.523	0.572	0.534	0.791	0.723	0.742	-0.209	0.00194763	0.0317516	SE	59090507-59090783~59122619-59122895~59128062-59128338
SE.13308	ENSMUSG00000061462.18	Obscn	chr11	-	0.301	0.33	0.364	0.711	0.536	0.527	-0.26	0.00196269	0.0319734	SE	59090507-59090783~59106294-59106570~59128062-59128338
MXE.571	ENSMUSG00000026950.18	Neb	chr2	-	0.777	0.818	0.667	0.599	0.685	0.68	0.099	0.00308878	0.0320826	MXE	52149589-52149697~52153055-52153148;52156354-52156447~52157290-52157383
SE.10316	ENSMUSG00000056770.15	Setd3	chr12	-	0.933	0.933	0.935	0.694	0.876	0.898	0.111	0.00197245	0.0321086	SE	108113318-108113393~108119105-108119164~108157753-108158010
SE.17264	ENSMUSG00000030087.11	Klf15	chr6	+	0.064	0.023	0.022	0.016	0	0.008	0.028	0.00197435	0.0321157	SE	90462673-90462725~90464636-90464843~90466419-90467523
SE.1308	ENSMUSG00000040097.16	Flywch1	chr17	-	0.789	0.803	0.879	0.964	1	0.845	-0.113	0.00197813	0.0321533	SE	23762975-23763318~23770234-23770332~23771414-23771602
SE.12937	ENSMUSG00000028763.18	Hspg2	chr4	+	0.018	0.015	0.018	0.022	0.04	0.049	-0.02	0.00198689	0.0322719	SE	137522458-137522650~137523851-137523890~137528804-137528897
SE.7911	ENSMUSG00000036810.16	Cnep1r1	chr8	+	0.543	0.454	0.568	0.784	0.6	0.695	-0.171	0.00199085	0.0322754	SE	88119779-88119851~88125081-88125155~88129694-88129804
SE.17674	ENSMUSG00000050471.17	Fam118b	chr9	-	0.649	1	0.451	1	1	1	-0.3	0.00199094	0.0322754	SE	35235230-35235483~35244613-35244706~35267722-35267780
SE.21044	ENSMUSG00000032267.8	Usp28	chr9	+	1	1	1	0.932	0.954	0.987	0.042	0.00199151	0.0322754	SE	49032213-49032353~49032508-49032688~49035592-49035771
SE.9449	ENSMUSG00000021277.16	Traf3	chr12	+	1	1	0.91	0.923	0.872	0.932	0.061	0.00199435	0.0322976	SE	111166462-111166602~111219810-111219921~111237561-111237820
SE.11052	ENSMUSG00000023206.16	Il15ra	chr2	+	1	0.751	0.546	0.783	1	1	-0.162	0.00199973	0.0323609	SE	11720012-11720105~11723511-11723610~11724095-11724128
SE.9585	ENSMUSG00000027630.13	Tbl1xr1	chr3	+	0.041	0.218	0.245	0.338	0.394	0.765	-0.331	0.00201219	0.0325386	SE	22089412-22089522~22102866-22102947~22148941-22149008
SE.5959	ENSMUSG00000048874.15	Phf3	chr1	-	0.904	0.89	0.699	0.899	1	1	-0.135	0.00201392	0.0325426	SE	30837104-30837266~30862986-30863255~30873577-30873581
SE.3696	ENSMUSG00000025612.5	Bach1	chr16	+	1	0.961	1	0.912	0.926	0.944	0.06	0.00201635	0.032558	SE	87698944-87699056~87715330-87715624~87718806-87720150
SE.7096	ENSMUSG00000035325.16	Sec31a	chr5	-	0.253	0.236	0.262	0.146	0.178	0.157	0.09	0.00202182	0.0325708	SE	100375207-100375331~100375960-100376053~100378827-100379001
SE.8737	ENSMUSG00000028478.18	Clta	chr4	+	0.024	0.041	0.116	0.084	0.227	0.317	-0.149	0.00202009	0.0325708	SE	44025448-44025560~44030214-44030268~44031399-44031435
SE.11861	ENSMUSG00000022092.11	Ppp3cc	chr14	-	0.895	0.92	1	0.778	0.45	0.804	0.261	0.00202308	0.0325708	SE	70247573-70247719~70266629-70266754~70267308-70267506
SE.16321	ENSMUSG00000059518.14	Znhit1	chr5	-	0.237	0.269	0.349	0.089	0.118	0.163	0.162	0.00202226	0.0325708	SE	136984878-136985049~136986125-136986255~136986810-136987232
SE.19457	ENSMUSG00000032637.15	Atxn2l	chr7	-	1	1	0.844	0.986	1	1	-0.047	0.0020265	0.0326021	SE	126493163-126493376~126493552-126493674~126493760-126493890
A3SS.2925	ENSMUSG00000061559.15	Wdr61	chr9	-	0.931	0.931	0.972	0.916	0.592	0.84	0.162	0.00124244	0.0326356	A3SS	54730633-54730656~54730656-54730661~54731386-54731437
RI.752	ENSMUSG00000004667.18	Polr2e	chr10	-	0.145	0.253	0.311	0.124	0.055	0.084	0.149	0.00161241	0.0327443	RI	80036763-80036842~80036763-80036973~80036914-80036973
RI.2506	ENSMUSG00000074064.6	Mlycd	chr8	+	0.029	0.049	0.043	0.105	0.028	0.132	-0.048	0.00162625	0.032796	RI	119401480-119401593~119401480-119402590~119402433-119402590
SE.21945	ENSMUSG00000021820.18	Camk2g	chr14	-	0.169	0.158	0.127	0.321	0.224	0.393	-0.161	0.00204184	0.0328248	SE	20745791-20745860~20747818-20747851~20755658-20755702
RI.2307	ENSMUSG00000033916.5	Chmp2a	chr7	-	0.072	0.157	0.104	0.054	0.041	0	0.079	0.00164044	0.032854	RI	13032434-13032565~13032434-13032821~13032641-13032821
SE.12783	ENSMUSG00000028797.20	Tmem234	chr4	+	0.126	0.131	0.153	0.229	0.379	0.325	-0.174	0.00204869	0.0328867	SE	129600982-129601243~129601406-129601533~129602194-129602261
SE.15570	ENSMUSG00000042359.18	Osbpl6	chr2	+	0.341	0.292	0.299	0.231	0.178	0.112	0.137	0.00204798	0.0328867	SE	76555013-76555117~76555889-76555982~76560185-76560260
RI.1807	ENSMUSG00000015094.16	Npdc1	chr2	+	0.136	0.372	0.29	0.117	0.139	0.068	0.158	0.00165676	0.0329537	RI	25408606-25408686~25408606-25409001~25408904-25409001
A3SS.2868	ENSMUSG00000034243.17	Golgb1	chr16	+	1	0.495	1	0	1	0	0.498	0.00127209	0.0331286	A3SS	36875201-36875263~36886130-36886133~36886133-36886228
A3SS.2033	ENSMUSG00000026826.13	Nr4a2	chr2	-	0.893	1	1	0.624	0.356	1	0.304	0.00129229	0.0332792	A3SS	57108560-57108618~57108618-57108739~57109062-57109265
A3SS.3020	ENSMUSG00000037370.13	Enpp1	chr10	-	0	0	0.197	0.109	0.263	0.164	-0.113	0.00129971	0.0332792	A3SS	24651244-24651396~24651396-24651399~24652834-24652886
SE.840	ENSMUSG00000049411.15	Tmem241	chr18	-	0	1	0	0.15	1	0.271	-0.14	0.00207678	0.0332907	SE	12064203-12064239~12066615-12066707~12067059-12067105
SE.10269	ENSMUSG00000026571.12	Dcaf6	chr1	-	0.961	0.99	0.982	1	0.741	0.945	0.082	0.00207688	0.0332907	SE	165357428-165357546~165367445-165367505~165374061-165374235
SE.9439	ENSMUSG00000015957.12	Wnt11	chr7	+	0	0.326	0	0.139	0.421	0.036	-0.09	0.00208039	0.0333226	SE	98835130-98835348~98836061-98836221~98839007-98839190
SE.17035	ENSMUSG00000061046.9	Haghl	chr17	-	0.741	1	1	0.798	1	0.708	0.078	0.00209126	0.0334723	SE	25784660-25784725~25785003-25785194~25785427-25785532
SE.6711	ENSMUSG00000039662.16	Icmt	chr4	+	0.068	0.072	0.044	0.109	0.17	0.218	-0.104	0.00210245	0.033627	SE	152298684-152298773~152299136-152299245~152299670-152299840
MXE.1112	ENSMUSG00000036377.19	C530008M17Rik	chr5	+	1	0.727	0.64	0.64	1	0.409	0.106	0.00326797	0.0337843	MXE	76759585-76759731~76822465-76822637;76840787-76840923~76848816-76848981
MXE.2076	ENSMUSG00000033763.14	Mtss2	chr8	+	0.406	0.442	0.454	0.672	0.496	0.682	-0.183	0.003287	0.0338223	MXE	110730022-110730120~110732057-110732178;110737145-110737220~110737571-110737748
SE.10356	ENSMUSG00000032503.18	Arpp21	chr9	-	1	1	0.87	0.879	0.958	0.839	0.065	0.00213117	0.0340615	SE	112124739-112125000~112126434-112126539~112127278-112127460
SE.10432	ENSMUSG00000003363.15	Pld3	chr7	-	0.547	1	1	0.476	1	0.769	0.101	0.00213458	0.0340912	SE	27542815-27542904~27545187-27545285~27552997-27553151
SE.2391	ENSMUSG00000022013.4	Dnajc15	chr14	-	0.982	0.994	1	0.971	0.956	0.966	0.028	0.00213997	0.0341266	SE	77840167-77840238~77844395-77844472~77852897-77852971
SE.19295	ENSMUSG00000040374.13	Pex2	chr3	-	0.26	0.097	0.123	0.678	0.318	0.529	-0.348	0.00214115	0.0341266	SE	5560499-5561760~5562668-5562732~5563164-5563272
SE.19641	ENSMUSG00000030946.13	Lhpp	chr7	+	1	1	1	0.808	0.877	1	0.105	0.00214145	0.0341266	SE	132642486-132642579~132650257-132650349~132705591-132706417
RI.1556	ENSMUSG00000024906.10	Mus81	chr19	-	0.57	0.469	0.624	0.29	0.194	0.363	0.272	0.00172906	0.0341578	RI	5483454-5483558~5483454-5483665~5483634-5483665
SE.12223	ENSMUSG00000055322.16	Tns1	chr1	-	0.02	0.099	0.055	0.011	0	0.03	0.044	0.00214645	0.0341814	SE	73927911-73928110~73936331-73936355~73937224-73937317
SE.7738	ENSMUSG00000033502.15	Cdc14a	chr3	-	1	1	1	1	0.547	1	0.151	0.00215167	0.0342398	SE	116298436-116298549~116308139-116308299~116322081-116322220
SE.14076	ENSMUSG00000051747.15	Ttn	chr2	-	0.348	0.369	0.334	0.645	0.377	0.706	-0.226	0.00215425	0.0342561	SE	76826994-76827078~76840232-76840313~76847387-76847471
A3SS.1026	ENSMUSG00000028470.10	Hint2	chr4	-	0.073	0.077	0.071	0.013	0	0.028	0.06	0.00135168	0.0343213	A3SS	43654512-43654585~43654585-43654614~43654715-43654820
SE.1241	ENSMUSG00000024188.16	Luc7l	chr17	+	0.442	0.162	0.207	0.644	0.437	0.69	-0.32	0.00216461	0.0343959	SE	26252998-26253091~26253973-26254044~26255030-26255125
SE.5957	ENSMUSG00000048874.15	Phf3	chr1	-	0.862	0.852	0.862	0.692	0.61	0.507	0.256	0.00216799	0.0344247	SE	30829842-30831559~30837104-30837266~30873577-30873581
MXE.146	ENSMUSG00000035258.15	Abi3bp	chr16	+	0.964	0.8	0.96	0.818	0.875	0.7	0.11	0.00337872	0.0344652	MXE	56592603-56592681~56594461-56594536;56647024-56647099~56652136-56652217
MXE.1212	ENSMUSG00000038371.15	Sbf2	chr7	-	0	0.247	0.211	0.048	0	0	0.137	0.00339644	0.0344652	MXE	110464587-110464707~110489220-110489358;110560257-110560346~110614706-110614761
MXE.2178	ENSMUSG00000039952.15	Dag1	chr9	-	0.138	0.095	0.092	0.098	0.036	0.068	0.041	0.00338591	0.0344652	MXE	108205943-108209661~108218012-108218410;108253100-108253157~108263624-108263815
RI.621	ENSMUSG00000024883.8	Rin1	chr19	+	0	0.231	0	0.041	0.294	0.052	-0.052	0.00175879	0.0345103	RI	5051200-5051254~5051200-5051468~5051353-5051468
A5SS.1735	ENSMUSG00000042557.14	Sin3a	chr9	+	0.053	0.059	0	0.239	0.146	0.105	-0.126	0.00166483	0.0345788	A5SS	57118069-57118162~57118162-57118171~57119092-57119187
SE.21056	ENSMUSG00000101304.1	Plet1os	chr9	-	0.695	0.727	0.655	0.832	1	1	-0.252	0.00218047	0.0345978	SE	50488798-50489487~50498925-50499170~50504620-50504805
SE.21771	ENSMUSG00000025786.17	Zdhhc3	chr9	-	0.271	0.331	0.748	0.058	0.08	0.142	0.357	0.00218287	0.034611	SE	123084213-123084310~123098922-123098974~123100262-123100592
SE.19140	ENSMUSG00000030753.15	Thap12	chr7	+	0.149	0.077	0.145	0.186	0.18	0.191	-0.062	0.00218543	0.0346266	SE	98706996-98707117~98707936-98708031~98710125-98710233
SE.7642	ENSMUSG00000030035.14	Wbp1	chr6	-	1	0.921	1	0.918	0.766	1	0.079	0.00218817	0.0346449	SE	83119867-83120044~83120184-83120876~83121202-83121559
RI.1000	ENSMUSG00000019927.6	Ube2d1	chr10	-	0.018	0.028	0.023	0.038	0.028	0.031	-0.009	0.00178303	0.0347511	RI	71259741-71259819~71259741-71262115~71262083-71262115
SE.793	ENSMUSG00000033632.16	AW554918	chr18	+	0.927	0.546	0.707	1	1	0.783	-0.201	0.00219713	0.0347618	SE	25339713-25340384~25344863-25344962~25399925-25400107
SE.1940	ENSMUSG00000022634.9	Yaf2	chr15	-	0.551	0.476	0.436	0.205	0.342	0.304	0.204	0.00219995	0.0347814	SE	93286409-93286562~93317538-93317608~93336339-93336465
RI.1912	ENSMUSG00000030232.18	Aebp2	chr6	+	0.554	0.546	0.558	0.717	0.654	0.76	-0.158	0.00180451	0.0347836	RI	140650755-140650782~140650755-140652826~140651315-140652826
RI.2778	ENSMUSG00000015656.17	Hspa8	chr9	+	1	0.754	0	1	1	0.789	-0.345	0.00180865	0.0347836	RI	40801917-40802127~40801917-40802623~40802417-40802623
A3SS.364	ENSMUSG00000021792.15	Prxl2a	chr14	-	0.473	0.843	1	0	1	0	0.439	0.00138682	0.0349227	A3SS	41004040-41004203~41004203-41004220~41013625-41013771
A5SS.974	ENSMUSG00000026790.19	Odf2	chr2	+	0.743	0.743	0.644	0.943	0.784	1	-0.199	0.00170098	0.0349281	A5SS	29893443-29893512~29893512-29893569~29901076-29901247
SE.728	ENSMUSG00000024969.15	Mark2	chr19	-	0.949	1	1	0.923	0.912	0.885	0.076	0.00221138	0.034937	SE	7275395-7277450~7278041-7278086~7280997-7281255
SE.579	ENSMUSG00000047656.9	Trpt1	chr19	+	1	1	0.938	0.731	1	1	0.069	0.00221708	0.0350018	SE	6996695-6996777~6998191-6998366~6998508-6998565
MXE.1580	ENSMUSG00000055013.16	Agap1	chr1	+	0.563	0.482	0.595	0.714	0.666	0.737	-0.159	0.00347005	0.0350507	MXE	89766305-89766464~89789162-89789324;89834433-89834588~89837711-89837802
SE.15098	ENSMUSG00000027628.10	Aar2	chr2	+	0.176	0.214	0.133	0.088	0.113	0.03	0.097	0.00222859	0.0351583	SE	156547583-156547883~156549884-156550027~156550648-156551449
SE.359	ENSMUSG00000025035.9	Arl3	chr19	-	0.971	0.946	0.949	0.741	1	0.752	0.124	0.00223219	0.0351641	SE	46531106-46531386~46541442-46541510~46542351-46542537
SE.4354	ENSMUSG00000059474.13	Mbtd1	chr11	+	0	0	0	1	0	1	-0.667	0.00223135	0.0351641	SE	93886105-93886121~93887021-93887073~93905158-93905358
SE.11148	ENSMUSG00000039621.13	Prex1	chr2	-	1	1	1	1	0.572	1	0.143	0.00223376	0.0351641	SE	166617832-166617966~166621171-166621333~166633365-166633467
SE.1245	ENSMUSG00000024182.16	Axin1	chr17	+	0.225	0.225	0.127	0.636	1	0.326	-0.462	0.0022358	0.0351711	SE	26189985-26190231~26192515-26192623~26193938-26194106
RI.362	ENSMUSG00000022241.6	Tars	chr15	-	0.019	0.058	0.039	0.19	0.053	0.093	-0.073	0.00186386	0.0351817	RI	11388080-11388218~11388080-11388460~11388297-11388460
RI.853	ENSMUSG00000028826.14	Maco1	chr4	-	0.175	0.122	0.296	0.111	0.112	0.094	0.092	0.00187195	0.0351817	RI	134802758-134804564~134802758-134806691~134806516-134806691
RI.2217	ENSMUSG00000066621.12	Tecpr1	chr5	-	0.091	0.066	0	0.34	0.444	0.112	-0.246	0.00185984	0.0351817	RI	144196131-144196251~144196131-144196458~144196351-144196458
RI.2829	ENSMUSG00000036529.17	Sbf1	chr15	-	0.11	0.098	0.145	0.075	0.066	0.051	0.054	0.00187781	0.0351817	RI	89301842-89301970~89301842-89302377~89302181-89302377
SE.21659	ENSMUSG00000036093.7	Arl5a	chr2	-	0.904	0.673	0.938	0.634	0.502	0.692	0.229	0.00224965	0.0353635	SE	52412061-52412145~52416063-52416211~52416635-52416696
SE.16434	ENSMUSG00000026199.17	Ankzf1	chr1	+	1	0.558	0.778	0.86	1	1	-0.175	0.00225782	0.0354666	SE	75192159-75192677~75194177-75194284~75194840-75194943
SE.9884	ENSMUSG00000025915.14	Sgk3	chr1	+	0	0	0	0.206	0	0.163	-0.123	0.0022599	0.0354739	SE	9798142-9798246~9827012-9827119~9865130-9865348
A3SS.2853	ENSMUSG00000031959.15	Wdr59	chr8	-	1	1	1	0.766	1	0.786	0.149	0.00143547	0.0358515	A3SS	111458922-111459046~111459046-111459049~111460582-111460655
RI.104	ENSMUSG00000024382.13	Ercc3	chr18	+	0	0.077	0	0.072	0.404	0.072	-0.157	0.00192845	0.0358988	RI	32245488-32245624~32245488-32245919~32245751-32245919
A3SS.1615	ENSMUSG00000002280.11	Ciao3	chr17	+	0.072	0	0.275	0.017	0.038	0.019	0.091	0.00145351	0.0360068	A3SS	25775045-25775141~25776948-25776965~25776965-25777109
SE.18353	ENSMUSG00000040225.15	Prrc2c	chr1	-	0.533	0.351	0.596	0.349	0.198	0.192	0.247	0.00230636	0.0361774	SE	162670724-162673656~162674098-162674151~162676690-162676817
A3SS.2608	ENSMUSG00000057788.13	Ddx49	chr8	-	0	0.154	0.205	0	0	0.036	0.108	0.00147626	0.0362755	A3SS	70294686-70294761~70294761-70294835~70295366-70295464
A3SS.1296	ENSMUSG00000038733.14	Wdr26	chr1	-	0.047	0.03	0.022	0.12	0.061	0.082	-0.055	0.00149429	0.0364248	A3SS	181203023-181203160~181203160-181203224~181209002-181209107
MXE.549	ENSMUSG00000026950.18	Neb	chr2	-	0.267	0.312	0.272	0.31	0.344	0.41	-0.071	0.00362975	0.0364964	MXE	52149589-52149697~52150536-52150629;52157290-52157383~52157831-52157912
A3SS.2540	ENSMUSG00000060601.13	Nr1h2	chr7	-	0.243	0	0.159	0.502	0.312	0.547	-0.32	0.00151177	0.0365585	A3SS	44551954-44552245~44552245-44552343~44552506-44552620
SE.5840	ENSMUSG00000029152.13	Ociad1	chr5	+	0.057	0.06	0.093	0.043	0.029	0.013	0.042	0.00233502	0.0366009	SE	73292806-73292976~73293965-73294010~73294284-73294347
A5SS.1243	ENSMUSG00000027708.14	Dcun1d1	chr3	-	0.837	0.937	0.909	1	1	1	-0.106	0.00181627	0.0368765	A5SS	35919000-35919169~35920970-35921112~35921112-35921188
SE.14487	ENSMUSG00000051747.15	Ttn	chr2	-	0.997	0.999	0.993	0.989	0.966	0.989	0.015	0.00235597	0.0369029	SE	76894141-76894423~76894659-76894902~76901463-76901742
SE.21230	ENSMUSG00000029089.8	5730480H06Rik	chr5	+	1	0.841	1	1	0.713	0.841	0.096	0.002358	0.0369085	SE	48375542-48375610~48377074-48377165~48379329-48379464
RI.2281	ENSMUSG00000035632.16	Cnot3	chr7	+	0.211	0.127	0.271	0.102	0.091	0.023	0.131	0.00199552	0.0369107	RI	3655570-3655952~3655570-3656156~3656032-3656156
RI.438	ENSMUSG00000024045.6	Akap8	chr17	-	0.815	0.947	0.942	0.966	1	0.955	-0.072	0.00200993	0.036942	RI	32312285-32312373~32312285-32313262~32313104-32313262
A3SS.912	ENSMUSG00000054405.14	Dnajc8	chr4	+	0	0.192	0	0.262	0	0.74	-0.27	0.00154237	0.0370047	A3SS	132538186-132538288~132541720-132541781~132541781-132541838
SE.20824	ENSMUSG00000036644.15	Tbc1d9b	chr11	+	0.648	0.827	0.767	0.447	0.327	0.66	0.269	0.00238792	0.0373501	SE	50163824-50163896~50164161-50164212~50168168-50168225
[truncated: 29,938 more rows]
